# Supplementary material
Source: PubMed Central journal article supplement (PMC3779473)
Supplement: NIHMS503648-supplement-4_si_001.pdf [file NIHMS503648-supplement-4_si_001.pdf]

## Supporting Information

### **Overcoming Synthetic Challenges of Oridonin A-Ring Structural Diversification:**

#### **Regio- and Stereoselective Installation of Azides and 1,2,3-Triazoles**

#### **at the C-1, C-2, or C-3 Position**

Chunyong Ding, Yusong Zhang, Haijun Chen, Christopher Wild, Tianzhi Wang, Mark A. White,

Qiang Shen, and Jia Zhou\*

*Chemical Biology Program, Department of Pharmacology and Toxicology, and Sealy Center for Structural Biology & Molecular Biophysics, University of Texas Medical Branch, Galveston, Texas 77555, United States, and Department of Clinical Cancer Prevention, Division of Cancer Prevention and Population Sciences, The University of Texas M.D. Anderson Cancer Center, Houston, Texas 77030,*

*United States*

*jizhou@utmb.edu*

## Table of Contents

|                                                                                          |               |
|------------------------------------------------------------------------------------------|---------------|
| <b>Figures S1- S4</b> .....                                                              | <b>S3-4</b>   |
| <b>Table S1</b> .....                                                                    | <b>S5</b>     |
| <b><i>In Vitro</i> Determination of Proliferation Effects against Cancer cells</b> ..... | <b>S6</b>     |
| <b>Synthetic Experimental Procedures</b> .....                                           | <b>S7-17</b>  |
| <b>Copies of NMR Data</b> .....                                                          | <b>S18-71</b> |

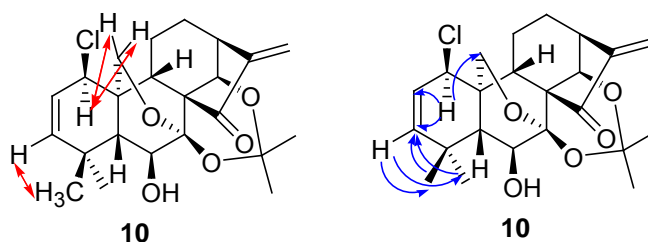

**Figure S1.** Selected ROESY correlations (H ↔ H) and key HMBC correlations (H → C) of **10**. The ROESY correlations of H-1/H<sub>2</sub>-20 indicated that H-1 was  $\alpha$ -directed. 1-Allylic chloride was determined by the ROESY correlation of H-1/H<sub>2</sub>-20 and the HMBC correlations of H-1/C-20, H-1/C-2 and H-1/C-3. The  $\Delta^2$  double bond was confirmed by the ROESY correlation of H-3/H<sub>3</sub>-18 and the HMBC correlations of H-3/C-18, H-3/C-19, H<sub>3</sub>-18/C-3 and H<sub>3</sub>-19/C-3.

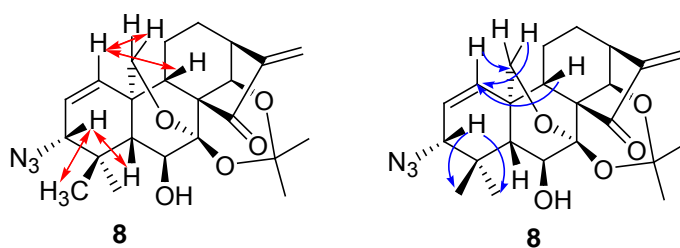

**Figure S2.** Selected ROESY correlations (H ↔ H) and key HMBC correlations (H → C) of **8**. The ROESY correlations of H-3/H<sub>3</sub>-18 and H-3/H-5 indicated that H-3 was  $\beta$ -directed. 3-Allylic azide was determined by the ROESY correlation of H-3/H<sub>3</sub>-18 and the HMBC correlations of H-3/C-18 and H-3/C-19. The  $\Delta^1$  double bond was confirmed by the ROESY correlations of H-1/H<sub>2</sub>-20 and H-1/H-9, and the HMBC correlations of H-1/C-20, H-9/C-1 and H<sub>2</sub>-20/C-1.

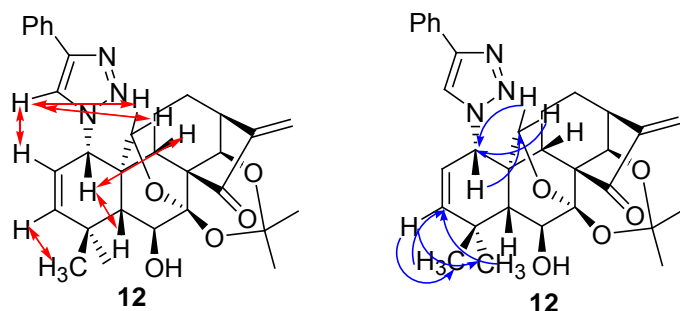

**Figure S3.** Selected ROESY correlations (H ↔ H) and key HMBC correlations (H → C) of **12**. The ROESY correlations of H-1/H-5, H-1/H-9 and H-5'/H<sub>2</sub>-20 indicated that H-1 was  $\beta$ -directed. 1-Allylic 1,2,3-triazole was determined by the ROESY correlations of H-1/H-9 and H-5'/H<sub>2</sub>-20, the HMBC correlations of H-1/C-20 and H<sub>2</sub>-20/C-1. The  $\Delta^2$  double bond was confirmed by the ROESY correlations of H-3/H<sub>3</sub>-18 and the HMBC correlations of H-3/C-18, H-3/C-19, H<sub>3</sub>-18/C-3 and H<sub>3</sub>-19/C-3.

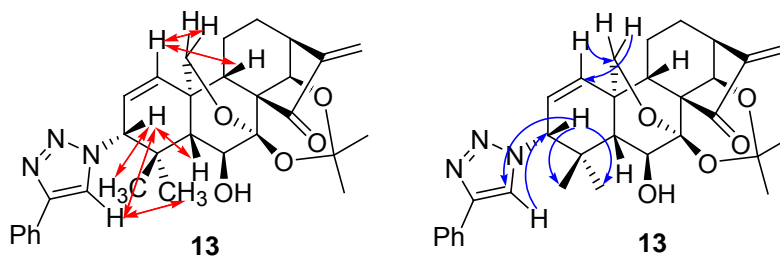

**Figure S4.** Selected ROESY correlations (H ↔ H) and key HMBC correlations (H → C) of **13**. The ROESY correlations of H-3/H<sub>3</sub>-18, H-5'/H<sub>3</sub>-19 and H-3/H-5 indicated that H-3 was  $\beta$ -directed. 3-Allylic 1,2,3-triazole was determined by the ROESY correlations of H-3/H<sub>3</sub>-18 and H-5'/H<sub>3</sub>-19, and the HMBC correlations of H-3/C-18, H-3/C-19, H-5'/C-3 and H-3/C-5'. The  $\Delta^1$  double bond was confirmed by the ROESY correlations of H-1/H<sub>2</sub>-20 and H-1/H-9, and the HMBC correlations of H-1/C-20 and H<sub>2</sub>-20/C-1.

**Table S1.** Ring opening of 1*S*,2*R*-epoxide **20** with NaN<sub>3</sub><sup>a</sup>

| Entry | Coordinating salt                                 | Solvent                                   | T (°C) | Time (h) | Yield (%) <sup>b</sup> | Recovery of <b>20</b> (%) <sup>b</sup> |
|-------|---------------------------------------------------|-------------------------------------------|--------|----------|------------------------|----------------------------------------|
| 1     | NH <sub>4</sub> Cl (2 equiv.)                     | MeOH/H <sub>2</sub> O (1:1)               | 55     | 24       | trace                  | 90                                     |
| 2     | NH <sub>4</sub> Cl (2 equiv.)                     | EtOH/H <sub>2</sub> O (1:1)               | 85     | 24       | 52                     | 31                                     |
| 3     | NH <sub>4</sub> Cl (2 equiv.)                     | EtOH/H <sub>2</sub> O (1:1)               | 85     | 48       | 40                     | 24                                     |
| 4     | NH <sub>4</sub> Cl (2 equiv.)                     | CH <sub>3</sub> CN/H <sub>2</sub> O (1:1) | 85     | 24       | 13                     | 86                                     |
| 5     | NH <sub>4</sub> Cl (2 equiv.)                     | Acetone/H <sub>2</sub> O (1:1)            | 85     | 24       | 8                      | 82                                     |
| 6     | NH <sub>4</sub> Cl (2 equiv.)                     | DMF                                       | 100    | 24       | 20                     | 32                                     |
| 7     | CeCl <sub>3</sub> ·7H <sub>2</sub> O (1.2 equiv.) | EtOH/H <sub>2</sub> O (1:1)               | 85     | 24       | 0                      | 96                                     |
| 8     | Bi(OTf) <sub>3</sub> (2 equiv.)                   | EtOH/H <sub>2</sub> O (1:1)               | 85     | 24       | trace                  | 90                                     |
| 9     | LiClO <sub>4</sub> (2 equiv.)                     | EtOH/H <sub>2</sub> O (1:1)               | 85     | 24       | 60                     | 20                                     |

<sup>a</sup> Reactions were performed with epoxide **20** (0.062 mmol), NaN<sub>3</sub> (8 equiv.), and the coordinating salt in 2 mL of solvent. <sup>b</sup> Isolated yield.

***In Vitro* Determination of Proliferation Effects against Cancer cells.** Cancer cells (breast cancer cell lines MCF-7 and MDA-MB-231) were seeded in 96-well plates at a density of  $1 \times 10^4$  cells/well and treated with DMSO, 0.01  $\mu\text{M}$ , 0.1  $\mu\text{M}$ , 1  $\mu\text{M}$ , 5  $\mu\text{M}$ , 10  $\mu\text{M}$ , and 100  $\mu\text{M}$  of individual compound for 48 h. Proliferation was measured by treating cells with the 3-(4,5-dimethylthiazol-2-yl)-2,5-diphenyltetrazolium bromide (MTT) in a CellTiter 96t AQueous Non-Radioactive Cell Proliferation Assay kit (Promega, Madison, WI, USA). Absorbance of all wells was determined by measuring OD at 550 nm after 1 h incubation at 37 °C on a 96-well iMark™ Microplate Absorbance Reader (BioRad, Hercules, CA). Each individual compound was tested in quadruplicate wells for each concentration.

## Synthetic Experimental Procedures

**General.** All commercially available starting materials and solvents were reagent grade, and used without further purification. Reactions were performed under a nitrogen atmosphere in dry glassware with magnetic stirring. Preparative column chromatography was performed using silica gel 60, particle size 0.063-0.200 mm (70-230 mesh, flash). Analytical TLC was carried out employing silica gel 60 F254 plates (Merck, Darmstadt). Visualization of the developed chromatograms was performed with detection by UV (254 nm). NMR spectra were recorded on Bruker-600 ( $^1\text{H}$ , 600 MHz;  $^{13}\text{C}$ , 150 MHz) or Bruker-300 ( $^1\text{H}$ , 300 MHz;  $^{13}\text{C}$ , 75 MHz) spectrometers.  $^1\text{H}$  and  $^{13}\text{C}$  NMR spectra were recorded with TMS as an internal reference. Chemical shifts were expressed in ppm, and J values were given in Hz. High-resolution mass spectra (HRMS) were obtained from Thermo Fisher LTQ Orbitrap Elite mass spectrometer. Parameters include the following: Nano ESI spray voltage was 1.8 kV; Capillary temperature was 275 °C and the resolution was 60,000; Ionization was achieved by positive mode. Melting points were measured on a Thermo Scientific Electrothermal Digital Melting Point Apparatus and uncorrected. Purity of final compounds was determined by analytical HPLC, which was carried out on a Shimadzu HPLC system (model: CBM-20A LC-20AD SPD-20A UV/VIS). HPLC analysis conditions: Waters  $\mu$ Bondapak C18 (300  $\times$  3.9 mm); flow rate 0.5 mL/min; UV detection at 270 and 254 nm; linear gradient from 30% acetonitrile in water (0.1% TFA) to 100% acetonitrile (0.1% TFA) in 20 min followed by 30 min of the last-named solvent.

### Synthesis of (3*S*,3*aR*,3*a*<sup>1</sup>*R*,6*aR*,7*S*,7*aR*,11*S*,11*aS*,11*bS*)-7-hydroxy-5,5,8,8-tetramethyl-15-methylene-14-oxodecahydro-1*H*-6*a*,11*a*-(epoxymethano)-3,3*a*<sup>1</sup>-ethanophenanthro[1,10-*de*][1,3]dioxin-11-yl methanesulfonate (**2**).

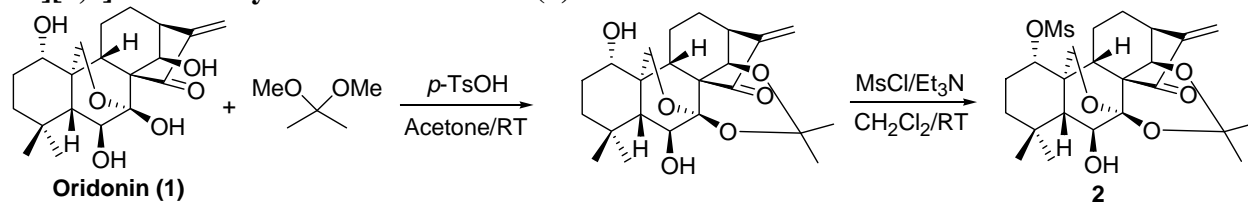

To a solution of oridonin (500 mg, 1.36 mmol) in acetone (20 mL) was added TsOH (20 mg) and 2,2-dimethoxypropane (3.0 mL) at rt. The resulting mixture was stirred at rt for 2 h, and then diluted with water and extracted with dichloromethane. The extract was washed with saturated NaHCO<sub>3</sub> (aq.) solution and brine, dried over anhydrous Na<sub>2</sub>SO<sub>4</sub>, filtered, and evaporated to afford the acetonide intermediate (520 mg, 93%); To a solution of the acetonide intermediate (277 mg, 0.68 mmol) in dichloromethane was added Et<sub>3</sub>N (138 mg, 1.37 mmol) and MsCl (94 mg, 0.82 mmol) slowly at 0 °C. The mixture was stirred at rt overnight, and diluted with water and extracted with dichloromethane. The organic extract was washed with saturated NaHCO<sub>3</sub> (aq.) solution and brine, dried over anhydrous Na<sub>2</sub>SO<sub>4</sub>, filtered, and evaporated to give an oily residue. The crude residue was further purified by silica gel column; elution with 50% EtOAc in hexane afforded the desired product **2** as a colorless gel (264 mg, 80%).  $^1\text{H}$  NMR (600 MHz, CDCl<sub>3</sub>)  $\delta$  6.17 (s, 1H), 5.82 (d, 1H,  $J$  = 12.0 Hz), 5.58 (s, 1H), 4.75 (d, 1H,  $J$  = 1.2 Hz), 4.60 (dd, 1H,  $J$  = 6.0 Hz, 12.0 Hz), 4.14 (m, 2H), 3.92 (dd, 1H,  $J$  = 7.8 Hz, 12.0 Hz), 3.07 (d, 1H,  $J$  = 9.0 Hz), 2.99 (s, 3H), 2.53 (m, 1H), 2.08 (m, 1H), 1.89 (m, 2H), 1.77 (m, 3H), 1.63 (s, 3H), 1.52 (m, 1H), 1.38 (d, 1H,  $J$  = 7.2 Hz), 1.33 (s, 3H), 1.31 (m, 1H), 1.19 (s, 3H), 1.18 (s, 3H);  $^{13}\text{C}$  NMR (150 MHz, CDCl<sub>3</sub>)  $\delta$  205.1, 150.4, 120.5, 101.1, 94.6, 84.8, 72.9, 69.9, 62.3, 59.5, 55.9, 50.1,

40.6, 40.1 (2C), 38.2, 33.2, 33.0, 30.1 (2C), 26.4, 25.4, 22.4, 18.8; HRMS Calcd for C<sub>24</sub>H<sub>36</sub>O<sub>8</sub>S: [M + H]<sup>+</sup> 483.2047; found 483.2052.

**Synthesis of (3*S*,3*aR*,3*a*<sup>1</sup>*R*,6*aR*,7*S*,7*aR*,11*aR*,11*bS*)-7-hydroxy-5,5,8,8-tetramethyl-15-methylene-2,3,3*a*,7,7*a*,8,9,11*b*-octahydro-1*H*-6*a*,11*a*-(epoxymethano)-3,3*a*<sup>1</sup>-ethanophenanthro[1,10-*de*][1,3]dioxin-14-one (**4**).**

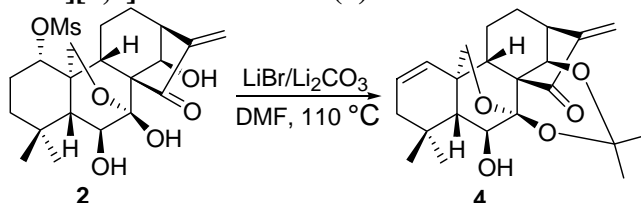

To a solution of **2** (34 mg, 0.07 mmol) in DMF (5 mL) was added LiBr (18 mg, 0.21 mmol) and Li<sub>2</sub>CO<sub>3</sub> (15 mg, 0.21 mmol) at rt. The resulting mixture was stirred at 115 °C for 2 h, and then diluted with water and extracted with EtOAc. The organic extract was washed with saturated NaHCO<sub>3</sub> (aq.) solution and brine, dried over anhydrous Na<sub>2</sub>SO<sub>4</sub>, filtered, and evaporated to give an oily residue. The crude residue was further purified by silica gel column; elution with 25% EtOAc in hexane afforded the desired product **4** as a colorless amorphous gel (25 mg, 84%). HPLC purity 99.8% (*t*<sub>R</sub> = 18.30 min). <sup>1</sup>H NMR (600 MHz, CDCl<sub>3</sub>) δ 6.16 (s, 1H), 5.77 (m, 1H), 5.56 (s, 1H), 5.41 (d, 1H, *J* = 12.0 Hz), 5.19 (dd, 1H, *J* = 3.0 Hz, 10.2 Hz), 4.82 (s, 1H), 3.99 (d, 1H, *J* = 10.2 Hz), 3.90 (dd, 1H, *J* = 8.4 Hz, 12.0 Hz), 3.81 (d, 1H, *J* = 9.6 Hz), 3.06 (d, 1H, *J* = 9.0 Hz), 2.53 (m, 1H), 1.95 (d, 1H, *J* = 17.4 Hz), 1.76 (m, 4H), 1.65 (s, 3H), 1.56 (m, 1H), 1.50 (d, 1H, *J* = 8.4 Hz), 1.35 (s, 3H), 1.18 (s, 3H), 1.05 (s, 3H); <sup>13</sup>C NMR (150 MHz, CDCl<sub>3</sub>) δ 204.5, 150.5, 130.3, 124.1, 120.4, 101.2, 95.4, 72.0, 70.1, 64.8, 57.9, 56.3, 49.1, 41.1, 40.3, 38.1, 32.2, 31.1, 30.3, 30.1, 25.5, 22.1, 17.3; HRMS Calcd for C<sub>23</sub>H<sub>31</sub>O<sub>5</sub>: [M + H]<sup>+</sup> 387.2166; found 387.2169.

**Synthesis of (3*S*,3*aR*,3*a*<sup>1</sup>*R*,6*aR*,7*S*,7*aS*,9*S*,11*aR*,11*bS*)-7,9-dihydroxy-5,5,8,8-tetramethyl-15-methylene-2,3,3*a*,7,7*a*,8,9,11*b*-octahydro-1*H*-6*a*,11*a*-(epoxymethano)-3,3*a*<sup>1</sup>-ethanophenanthro[1,10-*de*][1,3]dioxin-14-one (**6**).**

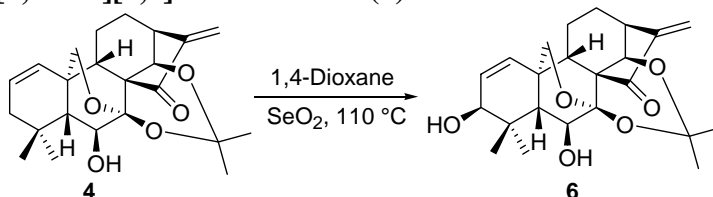

A mixture of **4** (20 mg, 0.05 mmol) and SeO<sub>2</sub> (16 mg, 0.15 mmol) in 1,4-dioxane (4 mL) was stirred at 100 °C for 16 h. After that, the reaction mixture was filtered, and the filtrate was diluted with water and extracted with dichloromethane. The extract was washed with brine, dried over anhydrous Na<sub>2</sub>SO<sub>4</sub>, filtered, and evaporated to give an oily residue. The residue was purified using preparative TLC developed by 50% EtOAc in hexane to afford the desired product **6** as a colorless solid (16 mg, 76%). HPLC purity 99.7% (*t*<sub>R</sub> = 17.31 min); <sup>1</sup>H NMR (600 MHz, CDCl<sub>3</sub>) δ 6.16 (s, 1H), 6.00 (dd, 1H, *J* = 6.0 Hz, 10.2 Hz), 5.56 (s, 1H), 5.42 (m, 2H), 4.82 (s, 1H), 3.94 (m, 2H), 3.84 (d, 1H, *J* = 9.6 Hz), 3.06 (d, 1H, *J* = 9.6 Hz), 2.53 (m, 1H), 1.87 (d, 1H, *J* = 9.0 Hz), 1.82 (m, 2H), 1.71 (m, 2H), 1.65 (s, 3H), 1.57 (m, 1H), 1.35 (s, 1H), 1.24 (s, 3H), 1.01 (s, 3H); <sup>13</sup>C NMR (150 MHz, CDCl<sub>3</sub>) δ 204.1, 150.3, 130.9, 128.6, 120.6, 101.2, 95.5, 72.6, 71.5,



70.0, 64.5, 56.1, 51.0, 48.8, 40.3, 38.2, 36.7, 30.2, 30.1, 25.9, 25.4, 21.9, 17.3; HRMS Calcd for C<sub>23</sub>H<sub>31</sub>O<sub>6</sub>: [M + H]<sup>+</sup> 403.2115; found 403.2118.

**(3*S*,3*aR*,3*a*<sup>1</sup>*R*,6*aR*,7*S*,7*aS*,9*S*,11*aR*,11*bS*)-7-hydroxy-5,5,8,8-tetramethyl-15-methylene-14-oxo-2,3,3*a*,7,7*a*,8,9,11*b*-octahydro-1*H*-6*a*,11*a*-(epoxymethano)-3,3*a*<sup>1</sup>-ethanophenanthro[1,10-*de*][1,3]dioxin-9-yl diphenyl phosphate (7).**

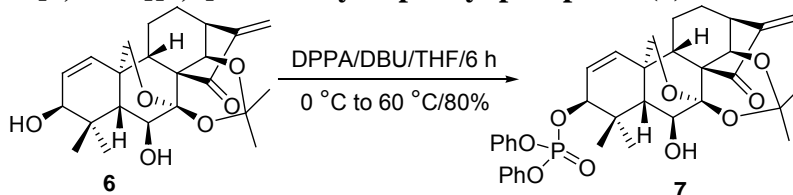

To a solution of **6** (25 mg, 0.062 mmol) in toluene (3 mL) was added DPPA (20.0 mg, 0.074 mmol) and DBU (11.0 mg, 0.074 mmol) at 0 °C. The resulting mixture was stirred at 60 °C for 6 h, and then diluted with water and extracted with dichloromethane. The extract was washed with brine, dried over anhydrous Na<sub>2</sub>SO<sub>4</sub>, filtered, and evaporated to give an oily residue. The residue was further purified using preparative TLC developed by 30% EtOAc in hexane to afford the desired product **7** (31 mg, 80%) as a colorless amorphous gel. <sup>1</sup>H NMR (600 MHz, CDCl<sub>3</sub>) δ 7.37 (m, 2H), 7.28 (m, 5H), 7.20 (m, 3H), 7.12 (m, 1H), 6.26 (s, 1H), 6.10 (m, 1H), 5.65 (s, 1H), 5.41 (m, 2H), 4.80 (s, 1H), 4.49 (t, 1H, *J* = 6.0 Hz), 3.89 (m, 2H), 3.82 (m, 1H), 3.09 (d, 1H, *J* = 9.0 Hz), 2.52 (m, 1H), 1.80 (d, 1H, *J* = 9.0 Hz), 1.75 (m, 1H), 1.70 (m, 1H), 1.65 (s, 3H), 1.45 (m, 1H), 1.37 (s, 3H), 1.19 (s, 3H), 1.04 (s, 3H). <sup>13</sup>C NMR (150 MHz, CDCl<sub>3</sub>) δ 204.0, 150.6, 150.5, 150.3, 131.3, 129.8, 129.5, 127.3, 125.3, 125.1, 120.6, 120.1, 120.0, 101.3, 95.4, 80.1, 71.2, 69.9, 64.3, 56.0, 51.2, 48.3, 40.3, 38.2, 36.6, 30.1, 29.9, 26.2, 25.4, 21.5, 17.2. HRMS Calcd for C<sub>35</sub>H<sub>40</sub>O<sub>9</sub>P: [M + H]<sup>+</sup> 635.2404; found 635.2411.

**(3*S*,3*aR*,3*a*<sup>1</sup>*R*,6*aR*,7*S*,7*aR*,11*R*,11*aS*,11*bR*)-11-chloro-7-hydroxy-5,5,8,8-tetramethyl-15-methylene-2,3,3*a*,7,7*a*,8,11,11*b*-octahydro-1*H*-6*a*,11*a*-(epoxymethano)-3,3*a*<sup>1</sup>-ethanophenanthro[1,10-*de*][1,3]dioxin-14-one (10).**

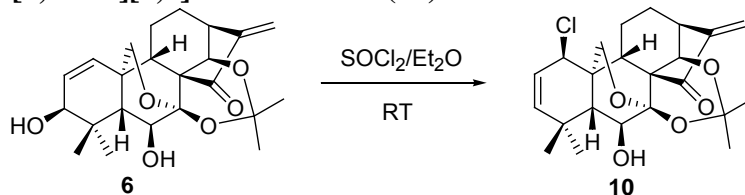

To a solution of **6** (25 mg, 0.062 mmol) in anhydrous ether (3 mL) was added freshly distilled SOCl<sub>2</sub> (8 mg, 0.068 mmol) at ice-water bath. The resulting mixture was stirred at rt for 3 h, and then diluted with water and extracted with dichloromethane. The extract was washed with brine, dried over anhydrous Na<sub>2</sub>SO<sub>4</sub>, filtered, and evaporated to give an oily residue. The residue was further purified using preparative TLC developed by 25% EtOAc in hexane to afford the desired product **10** (19 mg, 73%) as a colorless amorphous gel. <sup>1</sup>H NMR (300 MHz, CDCl<sub>3</sub>) δ 6.21 (s, 1H), 5.71 (m, 3H), 5.60 (s, 1H), 4.78 (s, 1H), 4.12 (dd, 1H, *J* = 7.2 Hz, 11.7 Hz), 4.00 (d, 1H, *J* = 6.0 Hz), 3.75 (m, 2H), 3.10 (d, 1H, *J* = 9.0 Hz), 2.52 (m, 1H), 2.33 (m, 1H), 1.92 (dd, 1H, *J* = 1.8 Hz, 6.9 Hz), 1.73 (m, 3H), 1.59 (s, 3H), 1.35 (s, 3H), 1.31 (s, 3H), 1.28 (s, 3H). <sup>13</sup>C NMR (75 MHz, CDCl<sub>3</sub>) δ 204.8, 150.2, 143.6, 120.7 (2C), 101.4, 95.5, 73.0, 70.0, 65.6, 56.3, 54.9, 52.3, 44.8, 40.3, 39.6, 34.3, 33.8, 30.1, 29.9, 28.1, 25.6, 16.3. HRMS Calcd for C<sub>23</sub>H<sub>30</sub>ClO<sub>5</sub>: [M + H]<sup>+</sup> 421.1776; found 421.1791.

**(3*S*,3*aR*,3*a*<sup>1</sup>*R*,6*aR*,7*S*,7*aR*,11*S*,11*aR*,11*bS*)-11-azido-7-hydroxy-5,5,8,8-tetramethyl-15-methylene-2,3,3*a*,7,7*a*,8,11,11*b*-octahydro-1*H*-6*a*,11*a*-(epoxymethano)-3,3*a*<sup>1</sup>-ethanophenanthro[1,10-*de*][1,3]dioxin-14-one (**11**).**

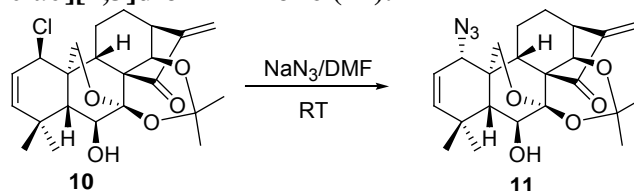

A mixture of **10** (30 mg, 0.071 mmol) and NaN<sub>3</sub> (25 mg, 0.355 mmol) in the dried DMF (3 mL) was stirred at rt under N<sub>2</sub> for 16 h. After the completion of the reaction, which was monitored by TLC, the reaction solvent was evaporated under vacuum at 27 °C to give an oily residue. The residue was further purified using preparative TLC developed by 25% EtOAc in hexane to afford the desired product **11** (21 mg, 71%) as a colorless amorphous gel. <sup>1</sup>H NMR (300 MHz, CDCl<sub>3</sub>) δ 6.18 (s, 1H), 5.91 (d, 1H, *J* = 11.7 Hz), 5.84 (dd, 1H, *J* = 2.1 Hz, 10.2 Hz), 5.59 (s, 1H), 5.44 (dd, 1H, *J* = 3.0 Hz, 10.2 Hz), 4.82 (d, 1H, *J* = 1.5 Hz), 4.18 (dd, 1H, *J* = 2.1 Hz, 10.2 Hz), 4.07 (m, 1H), 3.97 (dd, 1H, *J* = 1.2 Hz, 9.9 Hz), 3.97 (m, 1H), 3.12 (d, 1H, *J* = 9.6 Hz), 2.60 (m, 1H), 1.98 (m, 1H), 1.77 (m, 2H), 1.68 (s, 3H), 1.62 (m, 2H), 1.39 (s, 3H), 1.28 (s, 3H), 1.24 (s, 3H). <sup>13</sup>C NMR (75 MHz, CDCl<sub>3</sub>) δ 205.0, 150.4, 143.3, 120.4, 118.3, 101.2, 94.8, 72.8, 70.0, 63.2, 60.8, 56.6, 56.1, 49.6, 40.2, 38.6, 34.5, 32.4, 30.2, 30.1, 29.7, 26.2, 25.5, 18.2. HRMS Calcd for C<sub>23</sub>H<sub>30</sub>N<sub>3</sub>O<sub>5</sub>: [M + H]<sup>+</sup> 428.2180; found 428.2192.

**(3*S*,3*aR*,3*a*<sup>1</sup>*R*,6*aR*,7*S*,7*aR*,9*R*,11*aR*,11*bS*)-9-azido-7-hydroxy-5,5,8,8-tetramethyl-15-methylene-2,3,3*a*,7,7*a*,8,9,11*b*-octahydro-1*H*-6*a*,11*a*-(epoxymethano)-3,3*a*<sup>1</sup>-ethanophenanthro[1,10-*de*][1,3]dioxin-14-one (**8**).**

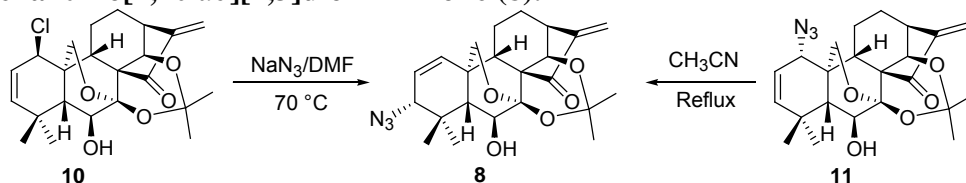

A mixture of **10** (30 mg, 0.071 mmol) and NaN<sub>3</sub> (25 mg, 0.355 mmol) in the dried DMF (3 mL) was stirred at 70 °C under N<sub>2</sub> for 10 h. After that, the reaction mixture was diluted with water and extracted with dichloromethane. The extract was washed with brine, dried over anhydrous Na<sub>2</sub>SO<sub>4</sub>, filtered, and evaporated to give an oily residue. The residue was further purified using preparative TLC developed by 25% EtOAc in hexane to afford the desired product **8** (22 mg, 74%) as a colorless amorphous gel.

A solution of **11** (10 mg, 0.023 mmol) in the dried CH<sub>3</sub>CN was refluxed at 85 °C for 8 h. After completion of the reaction, which was monitored by TLC, the reaction solvent was evaporated under vacuum at 27 °C to give an oily residue. The residue was further purified using preparative TLC developed by 25% EtOAc in hexane to afford the desired product **8** (9 mg, 90%) as a colorless amorphous gel. <sup>1</sup>H NMR (300 MHz, CDCl<sub>3</sub>) δ 6.18 (s, 1H), 5.73 (dd, 1H, *J* = 1.8 Hz, 10.5 Hz), 5.59 (s, 1H), 5.48 (d, 1H, *J* = 12.0 Hz), 5.38 (dd, 1H, *J* = 2.7 Hz, 10.5 Hz), 4.81 (d, 1H, *J* = 1.2 Hz), 3.95 (m, 2H), 3.84 (m, 1H), 3.75 (dd, 1H, *J* = 1.8 Hz, 2.4 Hz), 3.08 (dd, 1H, *J* = 0.9 Hz, 8.7 Hz), 2.54 (m, 1H), 1.76 (m, 3H), 1.64 (s, 3H), 1.53 (m, 2H), 1.35 (s, 3H), 1.28 (s, 3H), 1.01 (s, 3H). <sup>13</sup>C NMR (75 MHz, CDCl<sub>3</sub>) δ 204.4, 150.2, 129.5, 127.3, 120.8, 101.3, 95.3, 71.3, 69.9, 68.4, 64.6, 57.3, 56.1, 48.8, 40.2, 38.5, 38.3, 30.1 (2C), 27.2, 25.4, 17.3, 16.9. HRMS Calcd for C<sub>23</sub>H<sub>30</sub>N<sub>3</sub>O<sub>5</sub>: [M + H]<sup>+</sup> 428.2180; found 428.2190.

(3*S*,3*aR*,3*a*<sup>1</sup>*R*,6*aR*,7*S*,7*aR*,9*R*,11*aR*,11*bS*)-7-hydroxy-5,5,8,8-tetramethyl-15-methylene-9-(4-phenyl-1*H*-1,2,3-triazol-1-yl)-2,3,3*a*,7,7*a*,8,9,11*b*-octahydro-1*H*-6*a*,11*a*-(epoxymethano)-3,3*a*<sup>1</sup>-ethanophenanthro[1,10-*de*][1,3]dioxin-14-one (**13**) and (3*R*,4*aR*,5*S*,6*S*,6*aR*,9*S*,11*aS*,11*bR*,14*R*)-5,6,14-trihydroxy-4,4-dimethyl-8-methylene-3-(4-phenyl-1*H*-1,2,3-triazol-1-yl)-4,4*a*,5,6,9,10,11,11*a*-octahydro-3*H*-6,11*b*-(epoxymethano)-6*a*,9-methanocyclohepta[*a*]naphthalen-7(8*H*)-one (**15**).

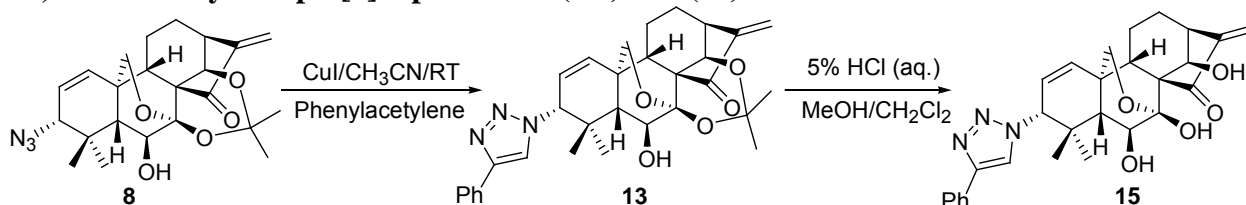

A mixture of **8** (15.0 mg, 0.035 mmol), phenylacetylene (7.1 mg, 0.07 mmol) and copper (I) iodide (6.6 mg, 0.035 mmol) in the dried acetonitrile (2 mL) was stirred at rt for 24 h. The reaction mixture was then diluted with water and extracted with dichloromethane. The extract was washed with brine, dried over anhydrous Na<sub>2</sub>SO<sub>4</sub>, filtered, and evaporated to give an oily residue. The residue was purified using preparative TLC developed by 30% ethyl acetate in hexane to afford the desired product **13** (14.0 mg, 78%) as a colorless amorphous gel. To a solution of **13** (10 mg, 0.018 mmol) in a mixture of MeOH (2.0 mL) and CH<sub>2</sub>Cl<sub>2</sub> (1.0 mL) was added 5% HCl aqueous solution (0.5 mL) at rt. The resulting mixture was stirred at rt for 2 h, and then diluted with water and extracted with dichloromethane. The extract was washed with saturated NaHCO<sub>3</sub> (aq.) solution and brine, dried over anhydrous Na<sub>2</sub>SO<sub>4</sub>, filtered, and evaporated to give an oily residue. The residue was purified using preparative TLC developed by 2.5% methanol in dichloromethane to afford the desired product **15** (8.0 mg, 86%) as a colorless amorphous gel. **Compound 13**: HPLC purity 96.8% (*t<sub>R</sub>* = 23.39 min); <sup>1</sup>H NMR (600 MHz, CDCl<sub>3</sub>) δ 7.84 (d, 2H, *J* = 7.2 Hz), 7.70 (s, 1H), 7.42 (m, 2H), 7.33 (t, 1H, *J* = 7.2 Hz), 6.22 (s, 1H), 5.90 (d, 1H, *J* = 10.2 Hz), 5.62 (s, 1H), 5.61 (d, 1H, *J* = 11.4 Hz), 5.56 (d, 1H, *J* = 10.2 Hz), 5.10 (s, 1H), 4.85 (s, 1H), 4.10 (d, 1H, *J* = 9.6 Hz), 3.97 (m, 2H), 3.11 (d, 1H, *J* = 9.0 Hz), 2.58 (m, 1H), 1.86 (m, 2H), 1.76 (m, 2H), 1.66 (s, 3H), 1.63 (m, 1H), 1.36 (s, 3H), 1.24 (s, 3H), 1.00 (s, 3H). <sup>13</sup>C NMR (150 MHz, CDCl<sub>3</sub>) δ 204.4, 150.1, 147.1, 130.5, 129.1, 128.8 (2C), 128.1, 127.9, 125.7 (2C), 121.1, 119.9, 101.4, 95.3, 71.4, 69.9, 67.8, 64.7, 57.3, 56.1, 48.8, 40.2, 38.4, 38.1, 30.1, 27.0, 25.4, 17.8, 17.3. HRMS Calcd for C<sub>31</sub>H<sub>36</sub>N<sub>3</sub>O<sub>5</sub>: [M + H]<sup>+</sup> 530.2649; found 530.2667. **Compound 15**: [α]<sub>D</sub><sup>25</sup> -72 (*c* 0.1, CH<sub>2</sub>Cl<sub>2</sub>); HPLC purity 96.8% (*t<sub>R</sub>* = 17.23 min); <sup>1</sup>H NMR (300 MHz, CDCl<sub>3</sub>) δ 7.84 (m, 2H), 7.69 (s, 1H), 7.42 (t, 2H, *J* = 7.5 Hz), 7.34 (m, 1H), 6.24 (br s, 2H), 5.91 (m, 1H), 5.63 (s, 1H), 5.61 (m, 1H), 5.10 (m, 1H), 4.93 (s, 1H), 3.99 (m, 3H), 3.07 (d, 1H, *J* = 8.7 Hz), 2.53 (m, 1H), 2.07 (m, 1H), 1.80 (m, 2H), 1.79 (d, 1H, *J* = 8.1 Hz), 1.63 (m, 2H), 1.21 (s, 3H), 0.98 (s, 3H). <sup>13</sup>C NMR (75 MHz, CDCl<sub>3</sub>) δ 206.4, 150.8, 147.2, 130.4, 129.4, 128.9 (2C), 128.3, 128.2, 125.7 (2C), 122.0, 119.8, 97.6, 72.8, 72.1, 67.6, 65.3, 62.0, 56.8, 52.0, 42.6, 38.9, 38.2, 29.6, 26.7, 17.6, 17.5. HRMS Calcd for C<sub>28</sub>H<sub>32</sub>N<sub>3</sub>O<sub>5</sub>: [M + H]<sup>+</sup> 490.2336; found 490.2344.

(3*S*,3*aR*,3*a*<sup>1</sup>*R*,6*aR*,7*S*,7*aR*,9*R*,11*aR*,11*bS*)-9-(4-(4-(*tert*-butyl)phenyl)-1*H*-1,2,3-triazol-1-yl)-7-hydroxy-5,5,8,8-tetramethyl-15-methylene-2,3,3*a*,7,7*a*,8,9,11*b*-octahydro-1*H*-6*a*,11*a*-(epoxymethano)-3,3*a*<sup>1</sup>-ethanophenanthro[1,10-*de*][1,3]dioxin-14-one (**17**) and (3*R*,4*aR*,5*S*,6*S*,6*aR*,9*S*,11*aS*,11*bR*,14*R*)-3-(4-(4-(*tert*-butyl)phenyl)-1*H*-1,2,3-triazol-1-yl)-

**5,6,14-trihydroxy-4,4-dimethyl-8-methylene-4,4a,5,6,9,10,11,11a-octahydro-3H-6,11b-(epoxymethano)-6a,9-methanocyclohepta[*a*]naphthalen-7(8H)-one (19).**

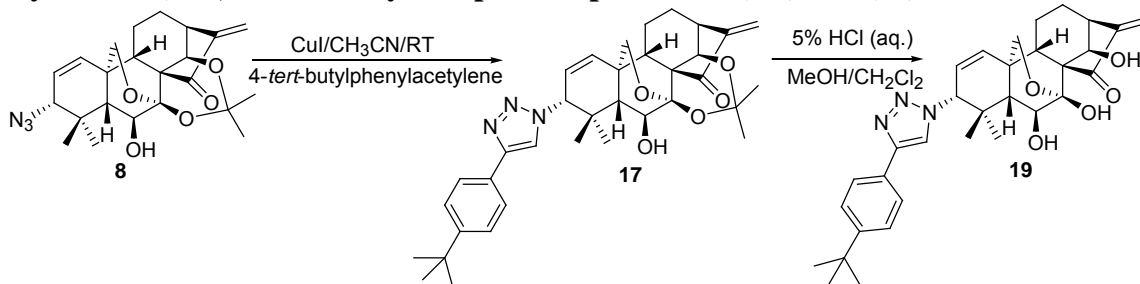

A mixture of **8** (13.6 mg, 0.032 mmol), 4-*tert*-butylphenylacetylene (10 mg, 0.064 mmol) and copper (I) iodide (6.0 mg, 0.032 mmol) in the dried acetonitrile (3 mL) was stirred at rt for 36 h. The reaction mixture was then diluted with water and extracted with dichloromethane. The extract was washed with brine, dried over anhydrous Na<sub>2</sub>SO<sub>4</sub>, filtered, and evaporated to give an oily residue. The residue was purified using preparative TLC developed by 30% ethyl acetate in hexane to afford the desired product **17** (15 mg, 80%) as a colorless amorphous gel. To a solution of **17** (6.0 mg, 0.01 mmol) in a mixture of MeOH (2.0 mL) and CH<sub>2</sub>Cl<sub>2</sub> (1.0 mL) was added 5% HCl aqueous solution (0.5 mL). The resulting mixture was stirred at rt for 2 h, and then diluted with water and extracted with dichloromethane. The extract was washed with saturated NaHCO<sub>3</sub> (aq.) solution and brine, dried over anhydrous Na<sub>2</sub>SO<sub>4</sub>, filtered, and evaporated to give an oily residue. The residue was purified using preparative TLC developed by 3% methanol in dichloromethane to afford the desired product **19** (4.7 mg, 85%) as a colorless amorphous gel. **Compound 17**: HPLC purity 96.8% (*t<sub>R</sub>* = 23.39 min); <sup>1</sup>H NMR (600 MHz, CDCl<sub>3</sub>) δ 7.77 (d, 1H, *J* = 8.4 Hz), 7.66 (s, 1H), 7.45 (d, 1H, *J* = 8.4 Hz), 6.22 (s, 1H), 5.90 (dd, 1H, *J* = 1.8 Hz, 10.8 Hz), 5.62 (s, 1H), 5.61 (d, 1H, *J* = 12.0 Hz), 5.56 (m, 1H), 5.09 (m, 1H), 4.85 (d, 1H, *J* = 1.2 Hz), 4.10 (d, 1H, *J* = 10.2 Hz), 3.95 (m, 1H), 3.10 (d, 1H, *J* = 9.0 Hz), 2.08 (m, 1H), 1.86 (m, 2H), 1.77 (m, 2H), 1.66 (s, 3H), 1.64 (m, 1H), 1.36 (s, 3H), 1.34 (s, 9H), 1.23 (s, 3H), 0.99 (s, 3H). <sup>13</sup>C NMR (150 MHz, CDCl<sub>3</sub>) δ 204.4, 151.3, 150.1, 147.1, 129.2, 127.8, 127.7, 125.7 (2C), 125.4 (2C), 121.0, 119.6, 101.4, 95.3, 71.4, 69.9, 67.8, 64.7, 57.3, 56.1, 48.8, 40.2, 38.4, 38.1, 34.6, 31.2 (3C), 30.1, 29.7, 27.0, 25.4, 17.7, 17.3. HRMS Calcd for C<sub>35</sub>H<sub>44</sub>N<sub>3</sub>O<sub>5</sub>: [M + H]<sup>+</sup> 586.3275; found 586.3280. **Compound 19**: [α]<sub>D</sub><sup>25</sup> -84 (*c* 0.1, MeOH/CH<sub>2</sub>Cl<sub>2</sub> = 1:1); HPLC purity 96.5% (*t<sub>R</sub>* = 20.82 min); <sup>1</sup>H NMR (600 MHz, CDCl<sub>3</sub>) δ 7.76 (d, 2H, *J* = 7.8 Hz), 7.65 (s, 1H), 7.45 (d, 2H, *J* = 7.8 Hz), 6.25 (s, 1H), 6.14 (d, 1H, *J* = 12.0 Hz), 5.92 (d, 1H, *J* = 10.2 Hz), 5.63 (s, 1H), 5.57 (d, 1H, *J* = 10.2 Hz), 5.19 (br s, 1H), 5.09 (s, 1H), 4.93 (s, 1H), 4.54 (br s, 1H), 4.10 (d, 1H, *J* = 10.2 Hz), 3.98 (d, 1H, *J* = 10.2 Hz), 3.88 (m, 1H), 3.10 (d, 1H, *J* = 9.0 Hz), 2.53 (m, 1H), 1.89 (m, 2H), 1.78 (d, 1H, *J* = 8.4 Hz), 1.66 (m, 2H), 1.34 (s, 9H), 1.21 (s, 3H), 0.97 (s, 3H). <sup>13</sup>C NMR (150 MHz, CDCl<sub>3</sub>) δ 206.2, 151.4, 150.8, 147.2, 129.5, 128.2, 127.5, 125.8 (2C), 125.4 (2C), 122.0, 119.5, 97.6, 72.9, 72.1, 67.5, 65.3, 62.1, 56.8, 51.9, 42.6, 38.9, 38.2, 34.6, 31.2 (3C), 29.6, 26.7, 17.6, 17.4. HRMS Calcd for C<sub>32</sub>H<sub>40</sub>N<sub>3</sub>O<sub>5</sub>: [M + H]<sup>+</sup> 546.2962; found 546.2976.

**(3*S*,3*aR*,3*a*<sup>1</sup>*R*,6*aR*,7*S*,7*aR*,11*S*,11*aR*,11*bS*)-7-hydroxy-5,5,8,8-tetramethyl-15-methylene-11-(4-phenyl-1*H*-1,2,3-triazol-1-yl)-2,3,3*a*,7,7*a*,8,11,11*b*-octahydro-1*H*-6*a*,11*a*-(epoxymethano)-3,3*a*<sup>1</sup>-ethanophenanthro[1,10-*de*][1,3]dioxin-14-one (12) and (1*S*,4*aR*,5*S*,6*S*,6*aR*,9*S*,11*aS*,11*bR*,14*R*)-5,6,14-trihydroxy-4,4-dimethyl-8-methylene-1-(4-phenyl-1*H*-1,2,3-triazol-1-yl)-4,4*a*,5,6,9,10,11,11*a*-octahydro-1*H*-6,11*b*-(epoxymethano)-6*a*,9-methanocyclohepta[*a*]naphthalen-7(8*H*)-one (14).**

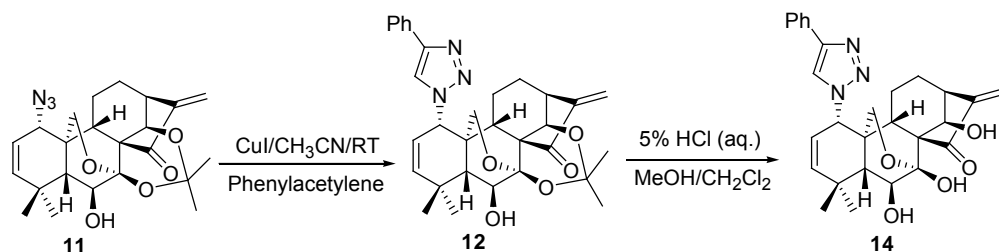

A mixture of **11** (9.0 mg, 0.021 mmol), phenylacetylene (4.3 mg, 0.042 mmol) and copper (I) iodide (4 mg, 0.021 mmol) in the dried acetonitrile (2 mL) was stirred at rt for 36 h. The reaction mixture was then diluted with water and extracted with dichloromethane. The extract was washed with brine, dried over anhydrous  $\text{Na}_2\text{SO}_4$ , filtered, and evaporated to give an oily residue. The residue was purified using preparative TLC developed by 30% ethyl acetate in hexane to afford the desired product **12** (9 mg, 82%). To a solution of **12** (5 mg, 0.009 mmol) in a mixture of MeOH (2.0 mL) and  $\text{CH}_2\text{Cl}_2$  (1.0 mL) was added 5% HCl aqueous solution (0.5 mL) at rt. The resulting mixture was stirred at rt for 2 h, and then diluted with water and extracted with dichloromethane. The extract was washed with saturated  $\text{NaHCO}_3$  (aq.) solution and brine, dried over anhydrous  $\text{Na}_2\text{SO}_4$ , filtered, and evaporated to give an oily residue. The residue was purified using preparative TLC developed by 2.5% methanol in dichloromethane to afford the desired product **14** (4.0 mg, 86%) as a colorless solid. **Compound 12**: HPLC purity 98.7% ( $t_R = 21.52$  min);  $^1\text{H}$  NMR (600 MHz,  $\text{CDCl}_3$ )  $\delta$  7.79 (m, 2H), 7.55 (s, 1H), 7.42 (t, 2H,  $J = 7.8$  Hz), 7.35 (m, 1H), 6.20 (s, 1H), 6.04 (m, 1H), 5.83 (d, 1H,  $J = 12.0$  Hz), 5.60 (s, 1H), 5.40 (m, 2H), 4.71 (s, 1H), 4.07 (dd, 1H,  $J = 7.8$  Hz, 12.0 Hz), 3.98 (d, 1H,  $J = 10.2$  Hz), 3.35 (dd, 1H,  $J = 1.8$  Hz, 10.2 Hz), 3.08 (d, 1H,  $J = 9.6$  Hz), 2.55 (m, 1H), 2.27 (m, 1H), 2.09 (m, 1H), 1.82 (dd, 1H,  $J = 1.2$  Hz, 7.2 Hz), 1.73 (m, 2H), 1.56 (s, 3H), 1.39 (s, 6H), 1.33 (s, 3H).  $^{13}\text{C}$  NMR (150 MHz,  $\text{CDCl}_3$ )  $\delta$  204.8, 150.3, 147.6, 144.7, 129.0, 128.9 (2C), 128.4, 125.7 (2C), 120.8, 120.0, 118.8, 101.2, 94.8, 72.6, 69.9, 63.8, 60.1, 57.4, 56.1, 50.6, 40.1, 38.3, 34.5, 32.2, 30.1, 30.0, 29.7, 25.4, 25.2, 18.6. HRMS Calcd for  $\text{C}_{31}\text{H}_{36}\text{N}_3\text{O}_5$ :  $[\text{M} + \text{H}]^+$  530.2649; found 530.2652. **Compound 14**:  $[\alpha]_D^{25} +68$  (c 0.1, MeOH/ $\text{CH}_2\text{Cl}_2 = 1:1$ ); HPLC purity 99.4% ( $t_R = 18.44$  min);  $^1\text{H}$  NMR (300 MHz,  $\text{CDCl}_3/\text{CD}_3\text{OD} = 10:1$ )  $\delta$  8.00 (s, 1H), 7.81 (m, 2H), 7.44 (m, 2H), 7.35 (m, 1H), 6.18 (s, 1H), 5.93 (dd, 1H,  $J = 2.1$  Hz, 9.9 Hz), 5.59 (s, 1H), 5.46 (t, 1H,  $J = 2.7$  Hz), 5.25 (dd, 1H,  $J = 3.3$  Hz, 6.9 Hz), 4.79 (d, 1H,  $J = 1.2$  Hz), 4.37 (m, 3H), 4.00 (d, 1H,  $J = 6.0$  Hz), 3.78 (m, 1H), 3.37 (s, 1H), 3.02 (m, 1H), 2.46 (m, 1H), 2.28 (m, 1H), 2.01 (m, 1H), 1.90 (m, 1H), 1.65 (m, 1H), 1.47 (m, 1H), 1.40 (s, 3H), 1.30 (s, 3H).  $^{13}\text{C}$  NMR (75 MHz,  $\text{CDCl}_3/\text{CD}_3\text{OD} = 10:1$ )  $\delta$  208.6, 151.6, 148.3, 142.6, 130.6, 129.5 (2C), 129.0, 126.3 (2C), 121.8, 121.5, 121.0, 97.6, 73.7, 73.5, 64.7, 62.1, 61.8, 58.4, 52.6, 43.7, 39.8, 35.3, 31.8, 30.2 (2C), 25.2, 18.8. HRMS Calcd for  $\text{C}_{28}\text{H}_{32}\text{N}_3\text{O}_5$ :  $[\text{M} + \text{H}]^+$  490.2336; found 490.2344.

(3*S*,3*aR*,3*a*<sup>1</sup>*R*,6*aR*,7*S*,7*aR*,11*S*,11*aR*,11*bS*)-11-(4-(4-(*tert*-butyl)phenyl)-1*H*-1,2,3-triazol-1-yl)-7-hydroxy-5,5,8,8-tetramethyl-15-methylene-2,3,3*a*,7,7*a*,8,11,11*b*-octahydro-1*H*-6*a*,11*a*-(epoxymethano)-3,3*a*<sup>1</sup>-ethanophenanthro[1,10-*de*][1,3]dioxin-14-one (**16**) and (1*S*,4*aR*,5*S*,6*S*,6*aR*,9*S*,11*aS*,11*bR*,14*R*)-1-(4-(4-(*tert*-butyl)phenyl)-1*H*-1,2,3-triazol-1-yl)-5,6,14-trihydroxy-4,4-dimethyl-8-methylene-4,4*a*,5,6,9,10,11,11*a*-octahydro-1*H*-6,11*b*-(epoxymethano)-6*a*,9-methanocyclohepta[*a*]naphthalen-7(8*H*)-one (**18**).

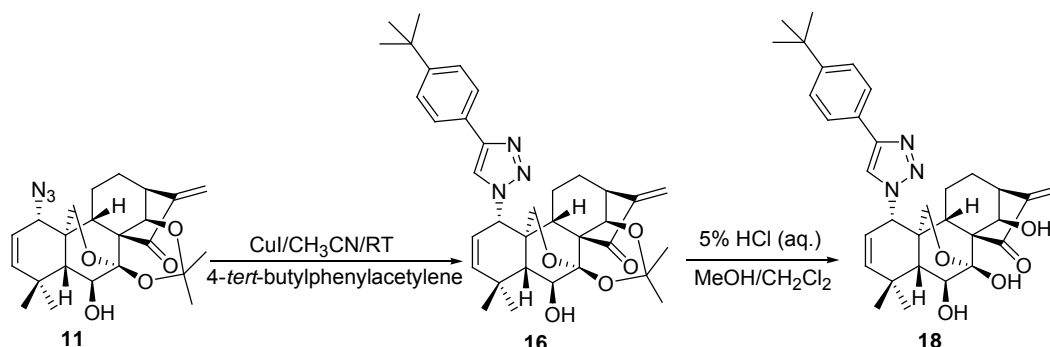

A mixture of **11** (17 mg, 0.039 mmol), 4-*tert*-butylphenylacetylene (12 mg, 0.078 mmol) and copper (I) iodide (7.4 mg, 0.039 mmol) in the dried acetonitrile (3 mL) was stirred at rt for 36 h. The reaction mixture was then diluted with water and extracted with dichloromethane. The extract was washed with brine, dried over anhydrous Na<sub>2</sub>SO<sub>4</sub>, filtered, and evaporated to give an oily residue. The residue was purified using preparative TLC developed by 30% ethyl acetate in hexane to afford the desired product **16** (18 mg, 78%) as a colorless amorphous gel. To a solution of **16** (10 mg, 0.017 mmol) in a mixture of MeOH (2.0 mL) and CH<sub>2</sub>Cl<sub>2</sub> (1.0 mL) was added 5% HCl aqueous solution (0.5 mL). The resulting mixture was stirred at rt for 2 h, and then diluted with water and extracted with dichloromethane. The extract was washed with saturated NaHCO<sub>3</sub> (aq.) solution and brine, dried over anhydrous Na<sub>2</sub>SO<sub>4</sub>, filtered, and evaporated to give an oily residue. The residue was purified using preparative TLC developed by 3% methanol in dichloromethane to afford the desired product **18** (8.4 mg, 91%) as a colorless amorphous gel. **Compound 16**: HPLC purity 98.2% (*t*<sub>R</sub> = 24.06 min); <sup>1</sup>H NMR (600 MHz, CDCl<sub>3</sub>) δ 7.71 (dd, 2H, *J* = 1.8 Hz, 6.6 Hz), 7.51 (s, 1H), 7.45 (dd, 1H, *J* = 1.8 Hz, 8.4 Hz), 6.19 (s, 1H), 6.04 (m, 1H), 5.82 (d, 1H, *J* = 12.0 Hz), 5.60 (s, 1H), 5.40 (m, 2H), 4.71 (d, 1H, *J* = 1.8 Hz), 4.07 (dd, 1H, *J* = 7.8 Hz, 12.0 Hz), 3.96 (dd, 1H, *J* = 1.2 Hz, 9.6 Hz), 3.35 (m, 1H), 3.08 (d, 1H, *J* = 9.6 Hz), 2.56 (m, 1H), 2.25 (m, 1H), 2.08 (m, 1H), 1.82 (dd, 1H, *J* = 1.8 Hz, 7.8 Hz), 1.71 (m, 2H), 1.56 (s, 3H), 1.39 (s, 3H), 1.38 (s, 3H), 1.34 (s, 9H), 1.33 (s, 3H). <sup>13</sup>C NMR (150 MHz, CDCl<sub>3</sub>) δ 204.9, 151.6, 150.3, 147.6, 144.6, 127.2, 125.8 (2C), 125.4 (2C), 120.8, 120.0, 118.5, 101.2, 94.8, 72.6, 69.9, 63.8, 60.0, 57.5, 56.1, 50.6, 40.1, 38.4, 34.7, 34.5, 32.2, 31.2 (3C), 30.1, 30.0, 29.7, 25.4, 25.2, 18.5. HRMS Calcd for C<sub>35</sub>H<sub>44</sub>N<sub>3</sub>O<sub>5</sub>: [M + H]<sup>+</sup> 586.3275; found 586.3284. **Compound 18**: [α]<sub>D</sub><sup>25</sup> +48 (*c* 0.07, MeOH/CH<sub>2</sub>Cl<sub>2</sub> = 1:1); HPLC purity 98.3% (*t*<sub>R</sub> = 21.13 min); <sup>1</sup>H NMR (300 MHz, CDCl<sub>3</sub>/CD<sub>3</sub>OD = 10:1) δ 7.72 (dd, 2H, *J* = 1.8 Hz, 6.6 Hz), 7.70 (s, 1H), 7.47 (dd, 2H, *J* = 1.8 Hz, 6.6 Hz), 6.20 (s, 1H), 5.97 (dd, 1H, *J* = 2.4 Hz, 10.2 Hz), 5.59 (s, 1H), 5.42 (m, 1H), 5.27 (dd, 1H, *J* = 3.3 Hz, 9.9 Hz), 4.77 (d, 1H, *J* = 1.5 Hz), 3.99 (d, 1H, *J* = 6.0 Hz), 3.84 (br s, 2H), 3.68 (m, 1H), 3.02 (d, 1H, *J* = 9.9 Hz), 2.47 (m, 1H), 2.23 (m, 1H), 2.06 (m, 1H), 1.87 (m, 1H), 1.64 (m, 1H), 1.51 (m, 1H), 1.38 (s, 3H), 1.35 (s, 9H), 1.31 (s, 3H). <sup>13</sup>C NMR (75 MHz, CDCl<sub>3</sub>/CD<sub>3</sub>OD = 10:1) δ 207.8, 152.1, 151.0, 148.0, 142.9, 127.1, 126.1 (2C), 125.7 (2C), 121.1, 121.0, 119.9, 97.2, 73.1, 64.3, 61.7, 61.2, 57.9, 52.4, 43.1, 39.3, 34.9 (2C), 31.6, 31.3 (3C), 29.9, 25.0, 18.5. HRMS Calcd for C<sub>32</sub>H<sub>40</sub>N<sub>3</sub>O<sub>5</sub>: [M + H]<sup>+</sup> 546.2962; found 546.2980.

**(1aR,3aR,4S,4aR,4a<sup>1</sup>R,7aR,8S,10aS,10bS,10cS)-4-hydroxy-3,3,6,6-tetramethyl-13-methylenedecahydro-1aH-4a,10b-(epoxymethano)-4a<sup>1</sup>,8-ethanooxireno[2',3':5,6]phenanthro[1,10-*de*][1,3]dioxin-14-one (20).**

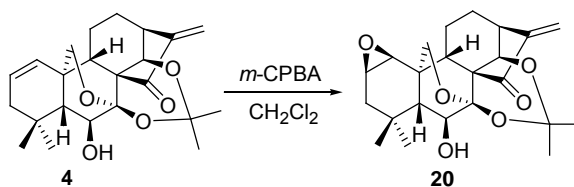

To a solution of **4** (16 mg, 0.04 mmol) in dichloromethane (4 mL) was added *m*-CPBA (9.0 mg, 0.04 mmol) at 0 °C. The resulting mixture was stirred at rt for 1 h. The reaction mixture was then diluted with water and extracted with dichloromethane. The extract was washed with saturated NaHCO<sub>3</sub> (aq.) solution and brine, dried over anhydrous Na<sub>2</sub>SO<sub>4</sub>, filtered, and evaporated to give an oily residue. The residue was further purified using preparative TLC developed by 50% EtOAc in hexane to afford the desired product **20** as a colorless gel (14 mg, 86%). HPLC purity 96.0% (*t*<sub>R</sub> = 19.21 min); <sup>1</sup>H NMR (600 MHz, CDCl<sub>3</sub>) δ 6.18 (s, 1H), 5.90 (s, 1H), 5.58 (br s, 1H), 4.83 (s, 1H), 4.14 (d, 1H, *J* = 9.6 Hz), 4.02 (d, 1H, *J* = 9.6 Hz), 3.82 (br s, 1H), 3.25 (br s, 1H), 3.08 (d, 1H, *J* = 9.0 Hz), 2.58 (m, 1H), 2.55 (m, 1H), 2.09 (m, 1H), 1.83 (m, 3H), 1.72 (m, 1H), 1.65 (s, 3H), 1.52 (d, 1H, *J* = 15.0 Hz), 1.34 (s, 3H), 1.19 (d, 1H, *J* = 7.8 Hz), 1.08 (s, 3H), 1.04 (s, 3H). <sup>13</sup>C NMR (150 MHz, CDCl<sub>3</sub>) δ 204.4, 150.2, 120.7, 101.4, 95.3, 71.9, 70.0, 64.9, 55.7, 54.4, 53.1, 52.3, 45.5, 40.4, 40.2, 36.0, 32.4, 30.3, 30.1 (2C), 25.5, 23.5, 16.6. HRMS Calcd for C<sub>23</sub>H<sub>31</sub>O<sub>6</sub>: [M + H]<sup>+</sup> 403.2115; found 403.2128.

**(3*S*,3*a**R*,3*a*<sup>1</sup>*R*,6*a**R*,7*S*,7*a**R*,10*S*,11*S*,11*a**S*,11*b**S*)-10-azido-7,11-dihydroxy-5,5,8,8-tetramethyl-15-methylenedecahydro-1*H*-6*a*,11*a*-(epoxymethano)-3,3*a*<sup>1</sup>-ethanophenanthro[1,10-*de*][1,3]dioxin-14-one (**21**).**

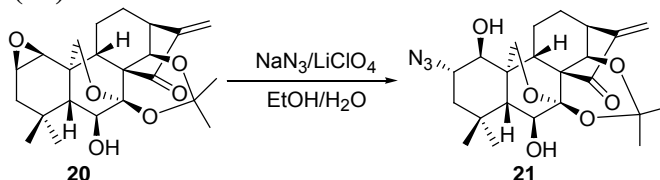

To a solution of **20** (25 mg, 0.062 mmol) in a mixture of ethanol (1 mL) and water (1 mL) was added LiClO<sub>4</sub> (13 mg, 0.124 mmol) and NaN<sub>3</sub> (32 mg, 0.496 mmol) at rt. The resulting mixture was stirred at 85 °C for 24 h, and then diluted with water and extracted with dichloromethane. The extract was washed with brine, dried over anhydrous Na<sub>2</sub>SO<sub>4</sub>, filtered, and evaporated to give an oily residue. The residue was purified using preparative TLC developed by 5% ethyl acetate in dichloromethane to afford the desired product **21** (16 mg, 60%) as a white solid, and 8 mg of **20** was recovered. HPLC purity 98.0% (*t*<sub>R</sub> = 19.36 min); <sup>1</sup>H NMR (600 MHz, CDCl<sub>3</sub>) δ 6.19 (s, 1H), 6.02 (d, 1H, *J* = 12.0 Hz), 5.59 (s, 1H), 4.78 (s, 1H), 4.48 (d, 1H, *J* = 10.2 Hz), 3.99 (dd, 1H, *J* = 7.2 Hz, 12.0 Hz), 3.83 (m, 2H), 3.36 (s, 1H), 3.09 (d, 1H, *J* = 9.0 Hz), 2.54 (m, 1H), 2.25 (m, 1H), 1.96 (m, 2H), 1.77 (m, 2H), 1.68 (m, 2H), 1.66 (s, 3H), 1.62 (d, 1H, *J* = 6.6 Hz), 1.37 (s, 3H), 1.35 (s, 3H), 1.23 (s, 3H). <sup>13</sup>C NMR (150 MHz, CDCl<sub>3</sub>) δ 205.2, 150.5, 120.3, 101.2, 94.7, 72.5, 70.2, 67.1, 64.8, 61.9, 55.7, 53.9, 44.0, 40.4, 39.4, 37.0, 34.7, 32.4, 30.2, 29.9, 25.6, 25.5, 16.3. HRMS Calcd for C<sub>23</sub>H<sub>32</sub>N<sub>3</sub>O<sub>6</sub>: [M + H]<sup>+</sup> 446.2286; found 446.2300.

**(3*S*,3*a**R*,3*a*<sup>1</sup>*R*,6*a**R*,7*S*,7*a**R*,10*S*,11*S*,11*a**S*,11*b**S*)-7,11-dihydroxy-5,5,8,8-tetramethyl-15-methylene-10-(4-phenyl-1*H*-1,2,3-triazol-1-yl)decahydro-1*H*-6*a*,11*a*-(epoxymethano)-3,3*a*<sup>1</sup>-ethanophenanthro[1,10-*de*][1,3]dioxin-14-one (**22**) and (1*S*,2*S*,4*a**R*,5*S*,6*S*,6*a**R*,9*S*,11*a**S*,11*b**S*,14*R*)-1,5,6,14-tetrahydroxy-4,4-dimethyl-8-methylene-2-(4-phenyl-1*H*-1,2,3-triazol-1-yl)decahydro-1*H*-6,11*b*-(epoxymethano)-6*a*,9-methanocyclohepta[*a*]naphthalen-7(8*H*)-one (**24**).**

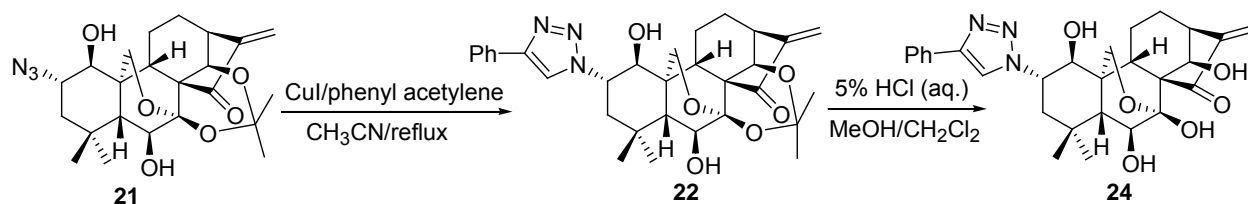

Copper (I) iodide (3.8 mg, 0.02 mmol) was added to a mixture of **21** (9 mg, 0.02 mmol) and phenyl acetylene (2.4 mg, 0.024 mmol) in acetonitrile (2 mL). The reaction mixture was stirred at 85 °C for 16 h, and then diluted with water and extracted with dichloromethane. The extract was washed with brine, dried over anhydrous Na<sub>2</sub>SO<sub>4</sub>, filtered, and evaporated to give an oily residue. The residue was purified using preparative TLC developed by 5% ethyl acetate in dichloromethane to afford the desired 1,2,3-triazole product **22** (6 mg, 60%), and 3 mg of **21** was recovered. To a solution of **22** (6 mg, 0.01 mmol) in a mixture of MeOH (2.0 mL) and CH<sub>2</sub>Cl<sub>2</sub> (1.0 mL) was added 5% HCl aqueous solution (0.5 mL) at rt. The resulting mixture was stirred at rt for 2 h, and then diluted with water and extracted with dichloromethane. The extract was washed with saturated NaHCO<sub>3</sub> (aq.) solution and brine, dried over anhydrous Na<sub>2</sub>SO<sub>4</sub>, filtered, and evaporated to give an oily residue. The residue was purified using preparative TLC developed by 5% methanol in dichloromethane to afford the desired product **24** (5.5 mg, 98%) as a colorless amorphous gel. **Compound 22**: HPLC purity 95.6% (*t*<sub>R</sub> = 19.78 min); <sup>1</sup>H NMR (300 MHz, CDCl<sub>3</sub>) δ 7.75 (m, 3H), 7.39 (m, 3H), 6.19 (s, 1H), 5.59 (s, 1H), 5.57 (d, 1H, *J* = 12.0 Hz), 4.82 (d, 1H, *J* = 1.2 Hz), 4.60 (m, 1H), 4.43 (m, 1H), 4.00 (m, 3H), 3.07 (d, 1H, *J* = 9.0 Hz), 2.99 (m, 1H), 2.50 (m, 1H), 2.33 (m, 1H), 2.18 (d, 1H, *J* = 7.2 Hz), 1.88 (m, 2H), 1.70 (m, 2H), 1.63 (s, 3H), 1.34 (s, 3H), 1.30 (s, 3H), 1.17 (s, 3H). <sup>13</sup>C NMR (75 MHz, CDCl<sub>3</sub>) δ 205.1, 150.6, 147.5, 130.1, 128.9 (2C), 128.4, 125.6 (2C), 120.4, 119.5, 101.1, 95.3, 72.4, 70.1, 68.7, 66.1, 62.0, 55.8, 54.4, 45.3, 40.8, 40.4, 33.9, 32.6, 30.4, 30.1, 29.7, 27.2, 25.4, 18.3. HRMS Calcd for C<sub>31</sub>H<sub>38</sub>N<sub>3</sub>O<sub>6</sub>: [M + H]<sup>+</sup> 548.2755; found 548.2775. **Compound 24**: [α]<sub>D</sub><sup>25</sup> +12 (*c* 0.1, MeOH/CH<sub>2</sub>Cl<sub>2</sub> = 1:1); HPLC purity 99.7% (*t*<sub>R</sub> = 16.74 min); <sup>1</sup>H NMR (600 MHz, CDCl<sub>3</sub>/CD<sub>3</sub>OD = 10:1) δ 8.22 (s, 1H), 7.80 (d, 2H, *J* = 7.2 Hz), 7.44 (m, 2H), 7.36 (m, 1H), 6.20 (s, 1H), 5.61 (s, 1H), 4.88 (s, 1H), 4.43 (s, 1H), 4.22 (m, 2H), 4.00 (d, 1H, *J* = 10.8 Hz), 3.85 (d, 1H, *J* = 10.8 Hz), 3.81 (d, 1H, *J* = 6.0 Hz), 3.05 (d, 1H, *J* = 9.6 Hz), 2.55 (m, 1H), 2.35 (m, 3H), 1.92 (m, 1H), 1.87 (m, 1H), 1.80 (d, 1H, *J* = 6.0 Hz), 1.72 (m, 1H), 1.28 (s, 3H), 1.05 (s, 3H). <sup>13</sup>C NMR (150 MHz, CDCl<sub>3</sub>/CD<sub>3</sub>OD = 10:1) δ 207.9, 151.4, 147.8, 130.3, 129.2 (2C), 128.7, 125.9 (2C), 120.9, 120.3, 97.5, 73.3, 73.2, 66.3, 66.2, 62.6, 61.4, 53.7, 43.5, 41.1, 38.3, 33.6, 32.7, 30.1, 29.9, 26.0, 16.6. HRMS Calcd for C<sub>28</sub>H<sub>34</sub>N<sub>3</sub>O<sub>6</sub>: [M + H]<sup>+</sup> 508.2442; found 508.2457.

**(3*S*,3*aR*,3*a*<sup>1</sup>*R*,6*aR*,7*S*,7*aR*,10*S*,11*S*,11*aS*,11*bS*)-10-(4-(4-(*tert*-butyl)phenyl)-1*H*-1,2,3-triazol-1-yl)-7,11-dihydroxy-5,5,8,8-tetramethyl-15-methylenedecahydro-1*H*-6*a*,11*a*-(epoxymethano)-3,3*a*1-ethanophenanthro[1,10-*de*][1,3]dioxin-14-one (**23**) and (1*S*,2*S*,4*aR*,5*S*,6*S*,6*aR*,9*S*,11*aS*,11*bS*,14*R*)-2-(4-(4-(*tert*-butyl)phenyl)-1*H*-1,2,3-triazol-1-yl)-1,5,6,14-tetrahydroxy-4,4-dimethyl-8-methylenedecahydro-1*H*-6,11*b*-(epoxymethano)-6*a*,9-methanocyclohepta[*a*]naphthalen-7(8*H*)-one (**25**).**



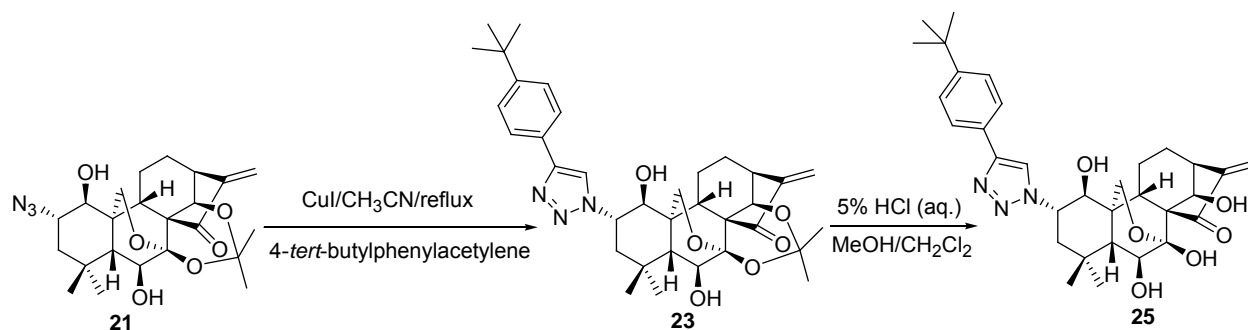

Copper (I) iodide (10.0 mg, 0.05 mmol) was added to a mixture of **21** (22.0 mg, 0.05 mmol) and 4-*tert*-butylphenylacetylene (15.8 mg, 0.10 mmol) in acetonitrile (2 mL). The reaction mixture was stirred at 85 °C for 16 h, and then diluted with water and extracted with dichloromethane. The extract was washed with brine, dried over anhydrous Na<sub>2</sub>SO<sub>4</sub>, filtered, and evaporated to give an oily residue. The residue was purified using preparative TLC developed by 33% ethyl acetate in hexane to afford the desired 1,2,3-triazole intermediate **23** (19 mg, 82%), and 5 mg of **21** was recovered. To a solution of **23** (8 mg, 0.013 mmol) in a mixture of MeOH (2.0 mL) and CH<sub>2</sub>Cl<sub>2</sub> (1.0 mL) was added 5% HCl aqueous solution (0.5 mL) at rt. The resulting mixture was stirred at rt for 2 h, and then diluted with water and extracted with dichloromethane. The extract was washed with saturated NaHCO<sub>3</sub> (aq.) solution and brine, dried over anhydrous Na<sub>2</sub>SO<sub>4</sub>, filtered, and evaporated to give an oily residue. The residue was purified using preparative TLC developed by 3% methanol in dichloromethane to afford the desired product **25** (7.0 mg, 98%) as a colorless amorphous gel. **Compound 23**: HPLC purity 95.0% (*t*<sub>R</sub> = 22.34 min); <sup>1</sup>H NMR (600 MHz, CDCl<sub>3</sub>) δ 7.72 (s, 1H), 7.67 (d, 1H, *J* = 9.0 Hz), 7.44 (d, 1H, *J* = 8.4 Hz), 6.19 (s, 1H), 5.59 (s, 1H), 5.58 (d, 1H, *J* = 11.4 Hz), 4.82 (s, 1H), 4.57 (m, 1H), 4.44 (m, 1H), 3.97 (m, 3H), 3.08 (m, 2H), 2.48 (m, 1H), 2.34 (m, 1H), 2.17 (d, 1H, *J* = 7.2 Hz), 1.88 (m, 1H), 1.83 (m, 1H), 1.73 (m, 2H), 1.63 (s, 3H), 1.34 (s, 9H), 1.30 (s, 3H), 1.25 (s, 3H), 1.18 (s, 3H). <sup>13</sup>C NMR (150 MHz, CDCl<sub>3</sub>) δ 205.1, 151.8, 150.6, 147.2, 127.3, 125.8 (2C), 125.3 (2C), 120.4, 118.8, 100.8, 95.0, 72.3, 70.1, 68.5, 66.1, 62.0, 55.8, 54.3, 45.3, 40.7, 40.3, 34.7, 33.9, 32.5, 31.2 (3C), 30.4, 30.1, 29.7, 27.1, 25.4, 18.1. HRMS Calcd for C<sub>35</sub>H<sub>46</sub>N<sub>3</sub>O<sub>6</sub>: [M + H]<sup>+</sup> 604.3381; found 604.3378. **Compound 25**: [α]<sub>D</sub><sup>25</sup> +10 (*c* 0.1, MeOH/CH<sub>2</sub>Cl<sub>2</sub> = 1:1); HPLC purity 99.9% (*t*<sub>R</sub> = 19.40 min); <sup>1</sup>H NMR (300 MHz, CDCl<sub>3</sub>/CD<sub>3</sub>OD = 10:1) δ 6.18 (s, 1H), 7.73 (d, 1H, *J* = 8.4 Hz), 7.48 (d, 1H, *J* = 8.7 Hz), 6.20 (s, 1H), 5.60 (s, 1H), 4.89 (d, 1H, *J* = 1.2 Hz), 4.44 (d, 1H, *J* = 2.1 Hz), 4.22 (br s, 3H), 4.00 (d, 1H, *J* = 9.0 Hz), 3.81 (m, 2H), 3.04 (d, 1H, *J* = 9.6 Hz), 2.54 (m, 1H), 2.33 (m, 3H), 1.84 (m, 4H), 1.35 (s, 9H), 1.28 (s, 3H), 1.03 (s, 3H). <sup>13</sup>C NMR (75 MHz, CDCl<sub>3</sub>/CD<sub>3</sub>OD = 10:1) δ 208.3, 152.1, 151.8, 148.0, 127.7, 126.3 (2C), 125.9 (2C), 121.0, 120.5, 97.7, 73.6, 73.5, 66.4, 66.3, 62.7, 61.6, 54.1, 43.8, 41.3, 38.3, 35.0, 33.8, 32.9, 31.4 (3C), 30.4, 30.1, 26.0, 16.7. HRMS Calcd for C<sub>32</sub>H<sub>42</sub>N<sub>3</sub>O<sub>6</sub>: [M + H]<sup>+</sup> 564.3068; found 564.3073.

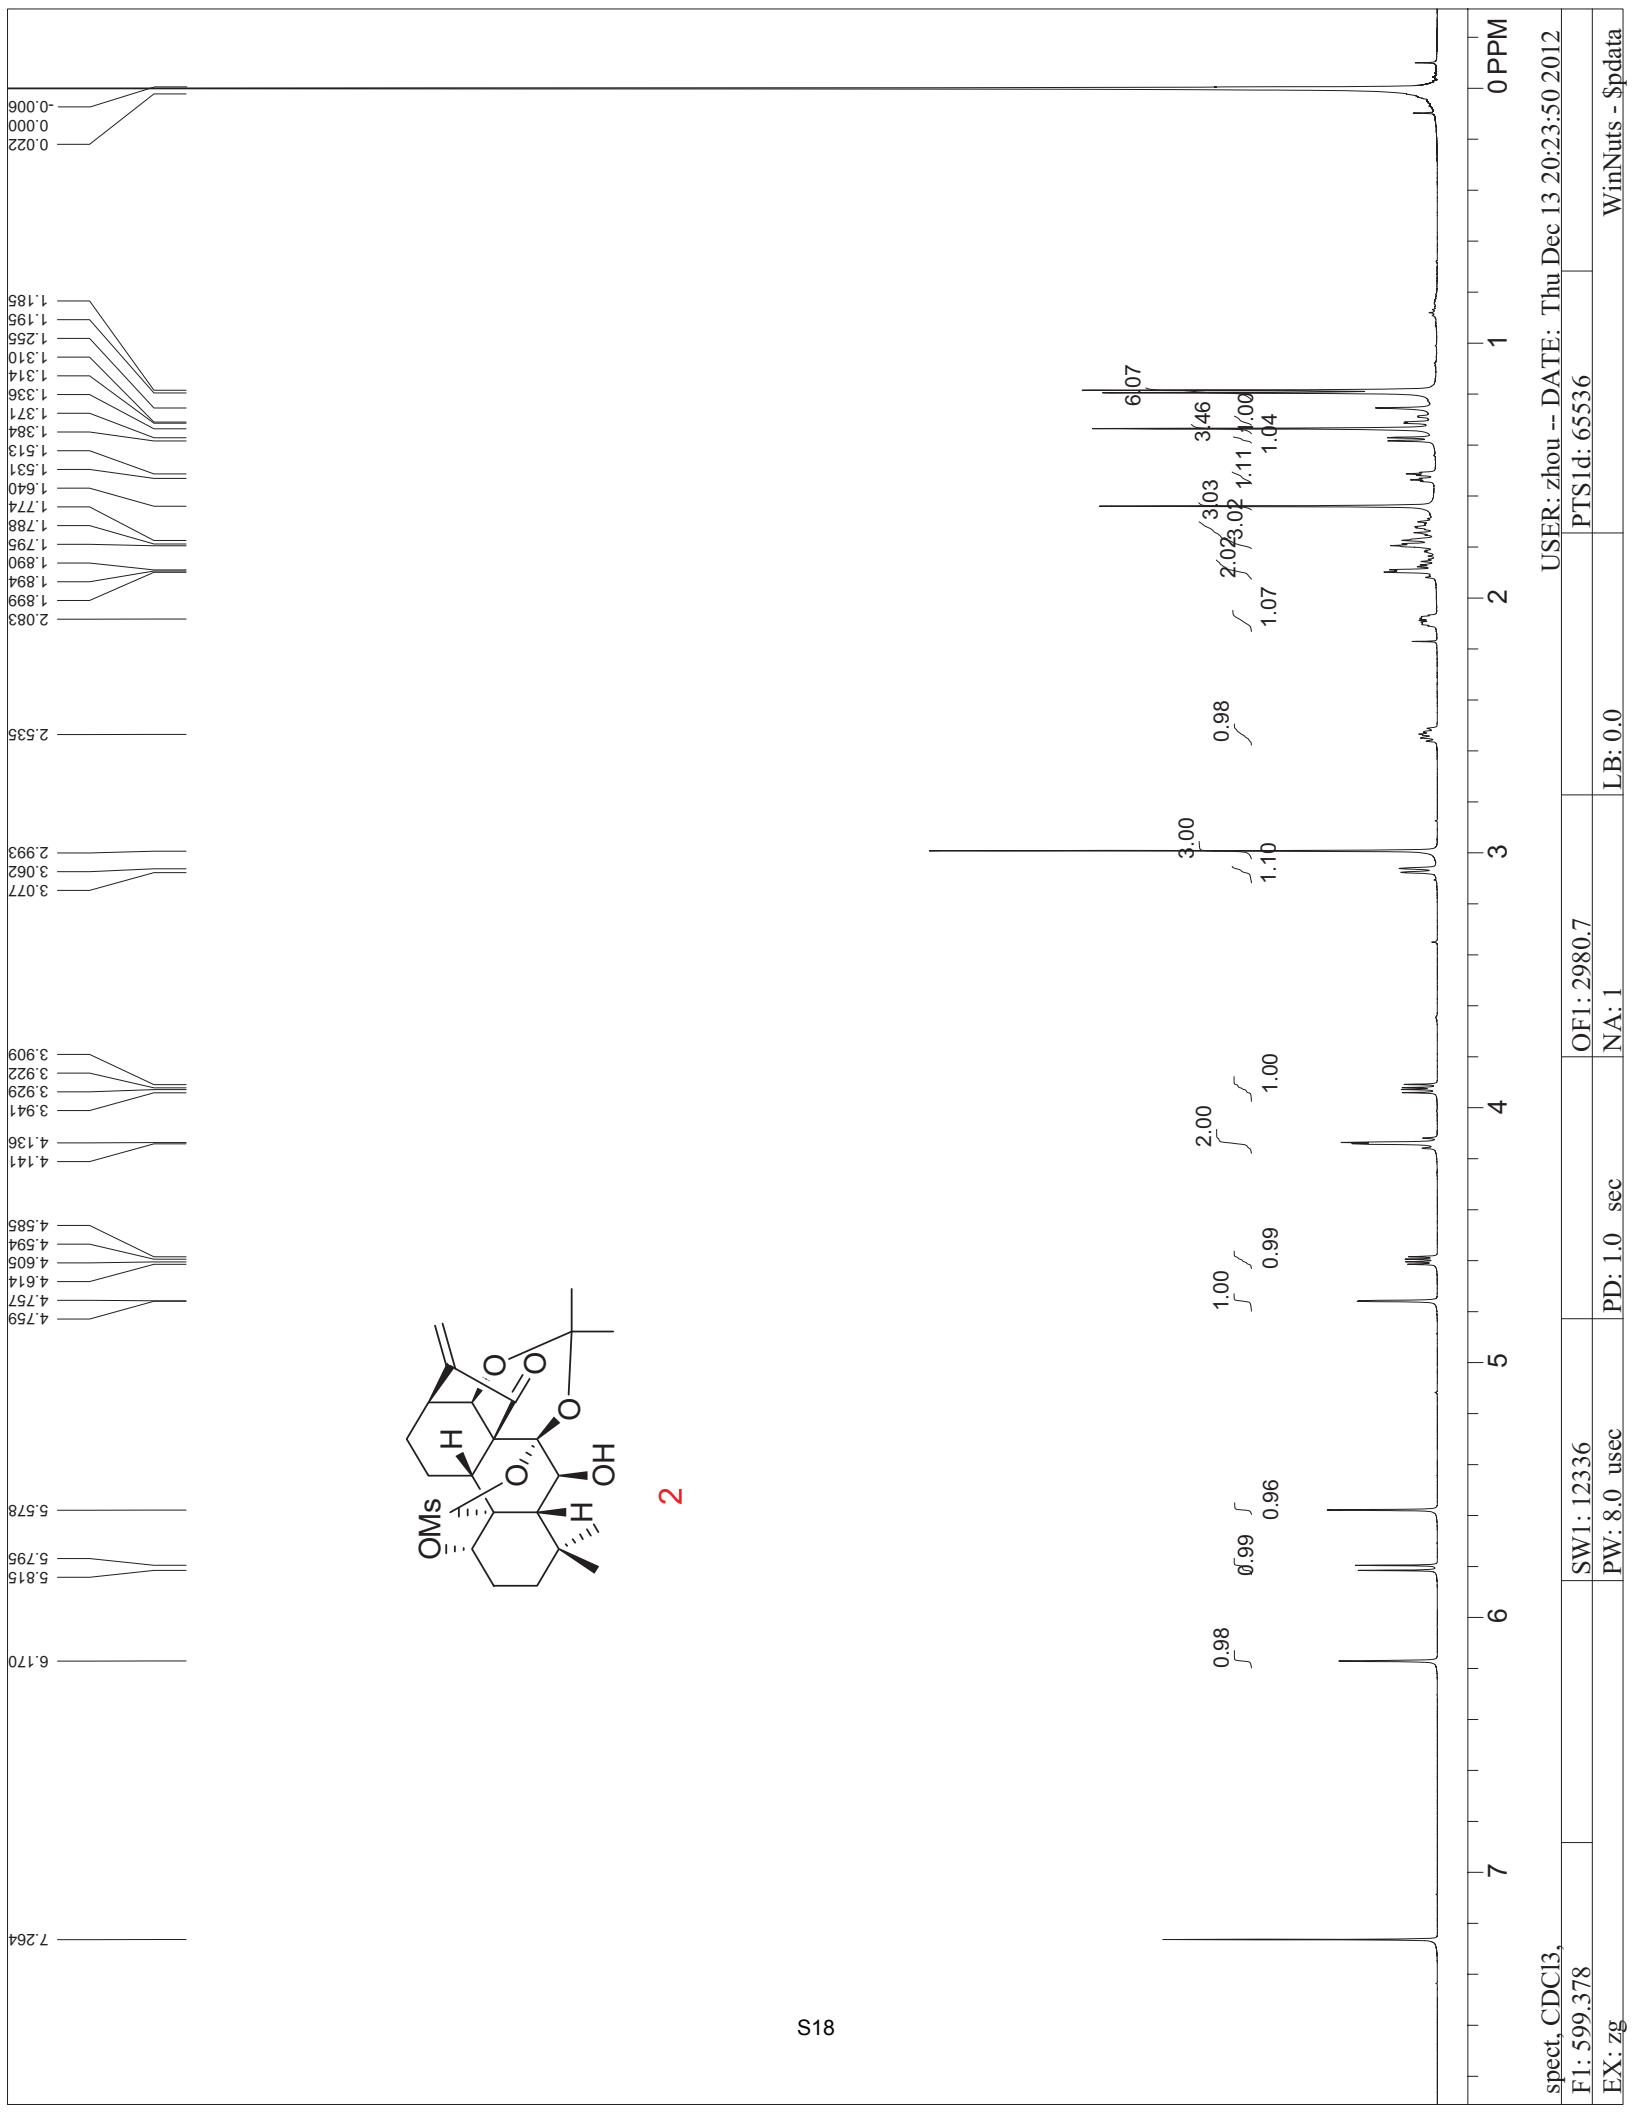

spect, CDCI3, USER: zhou -- DATE: Thu Dec 13 20:23:50 2012  
 F1: 599.378 SW1: 12336 OF1: 2980.7 PTS1d: 65536  
 EX: zg PW: 8.0 usec PD: 1.0 sec NA: 1 LB: 0.0 WinNuts - \$pdata

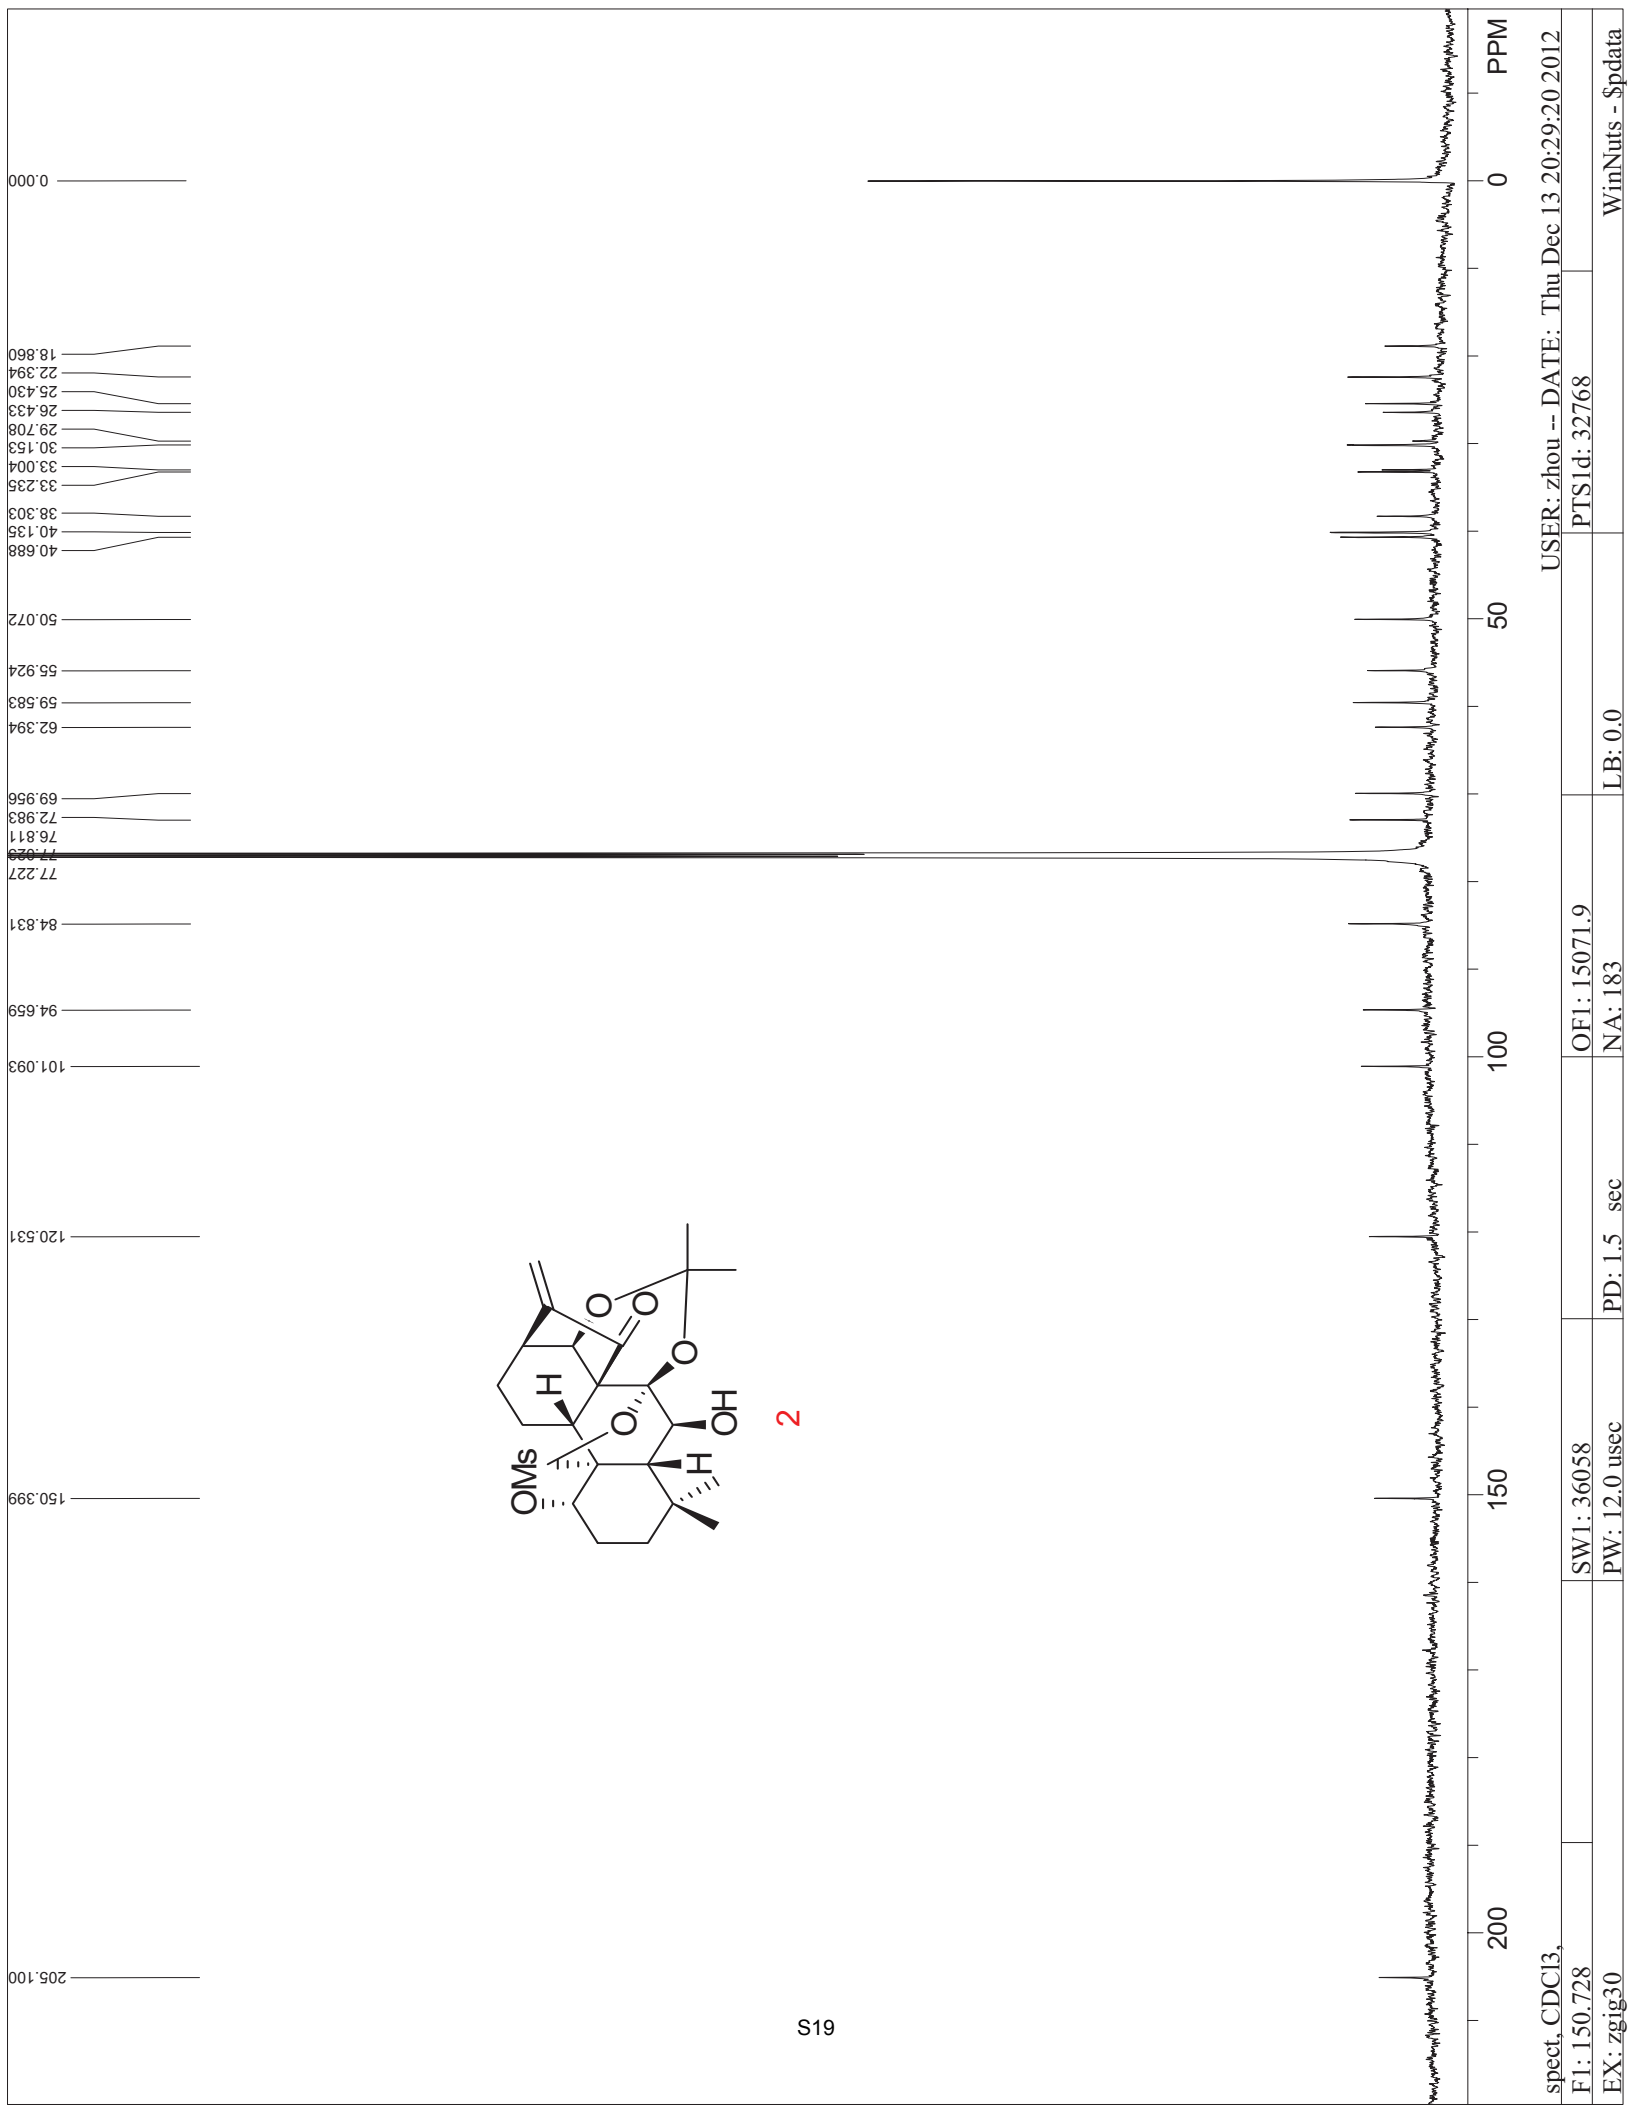

18.860  
22.394  
25.430  
26.433  
29.708  
30.153  
33.004  
33.235  
38.303  
40.135  
40.688  
50.072  
55.924  
59.583  
62.394  
69.956  
72.983  
76.811  
77.227  
84.831  
94.659  
101.093  
120.531  
150.399  
205.100

spect, CDCI3, USER: zhou -- DATE: Thu Dec 13 20:29:20 2012  
 F1: 150.728 OF1: 15071.9 PTS1d: 32768  
 EX: zgig30 PW: 12.0 usec PD: 1.5 sec NA: 183 LB: 0.0  
 WinNuts - \$pdata

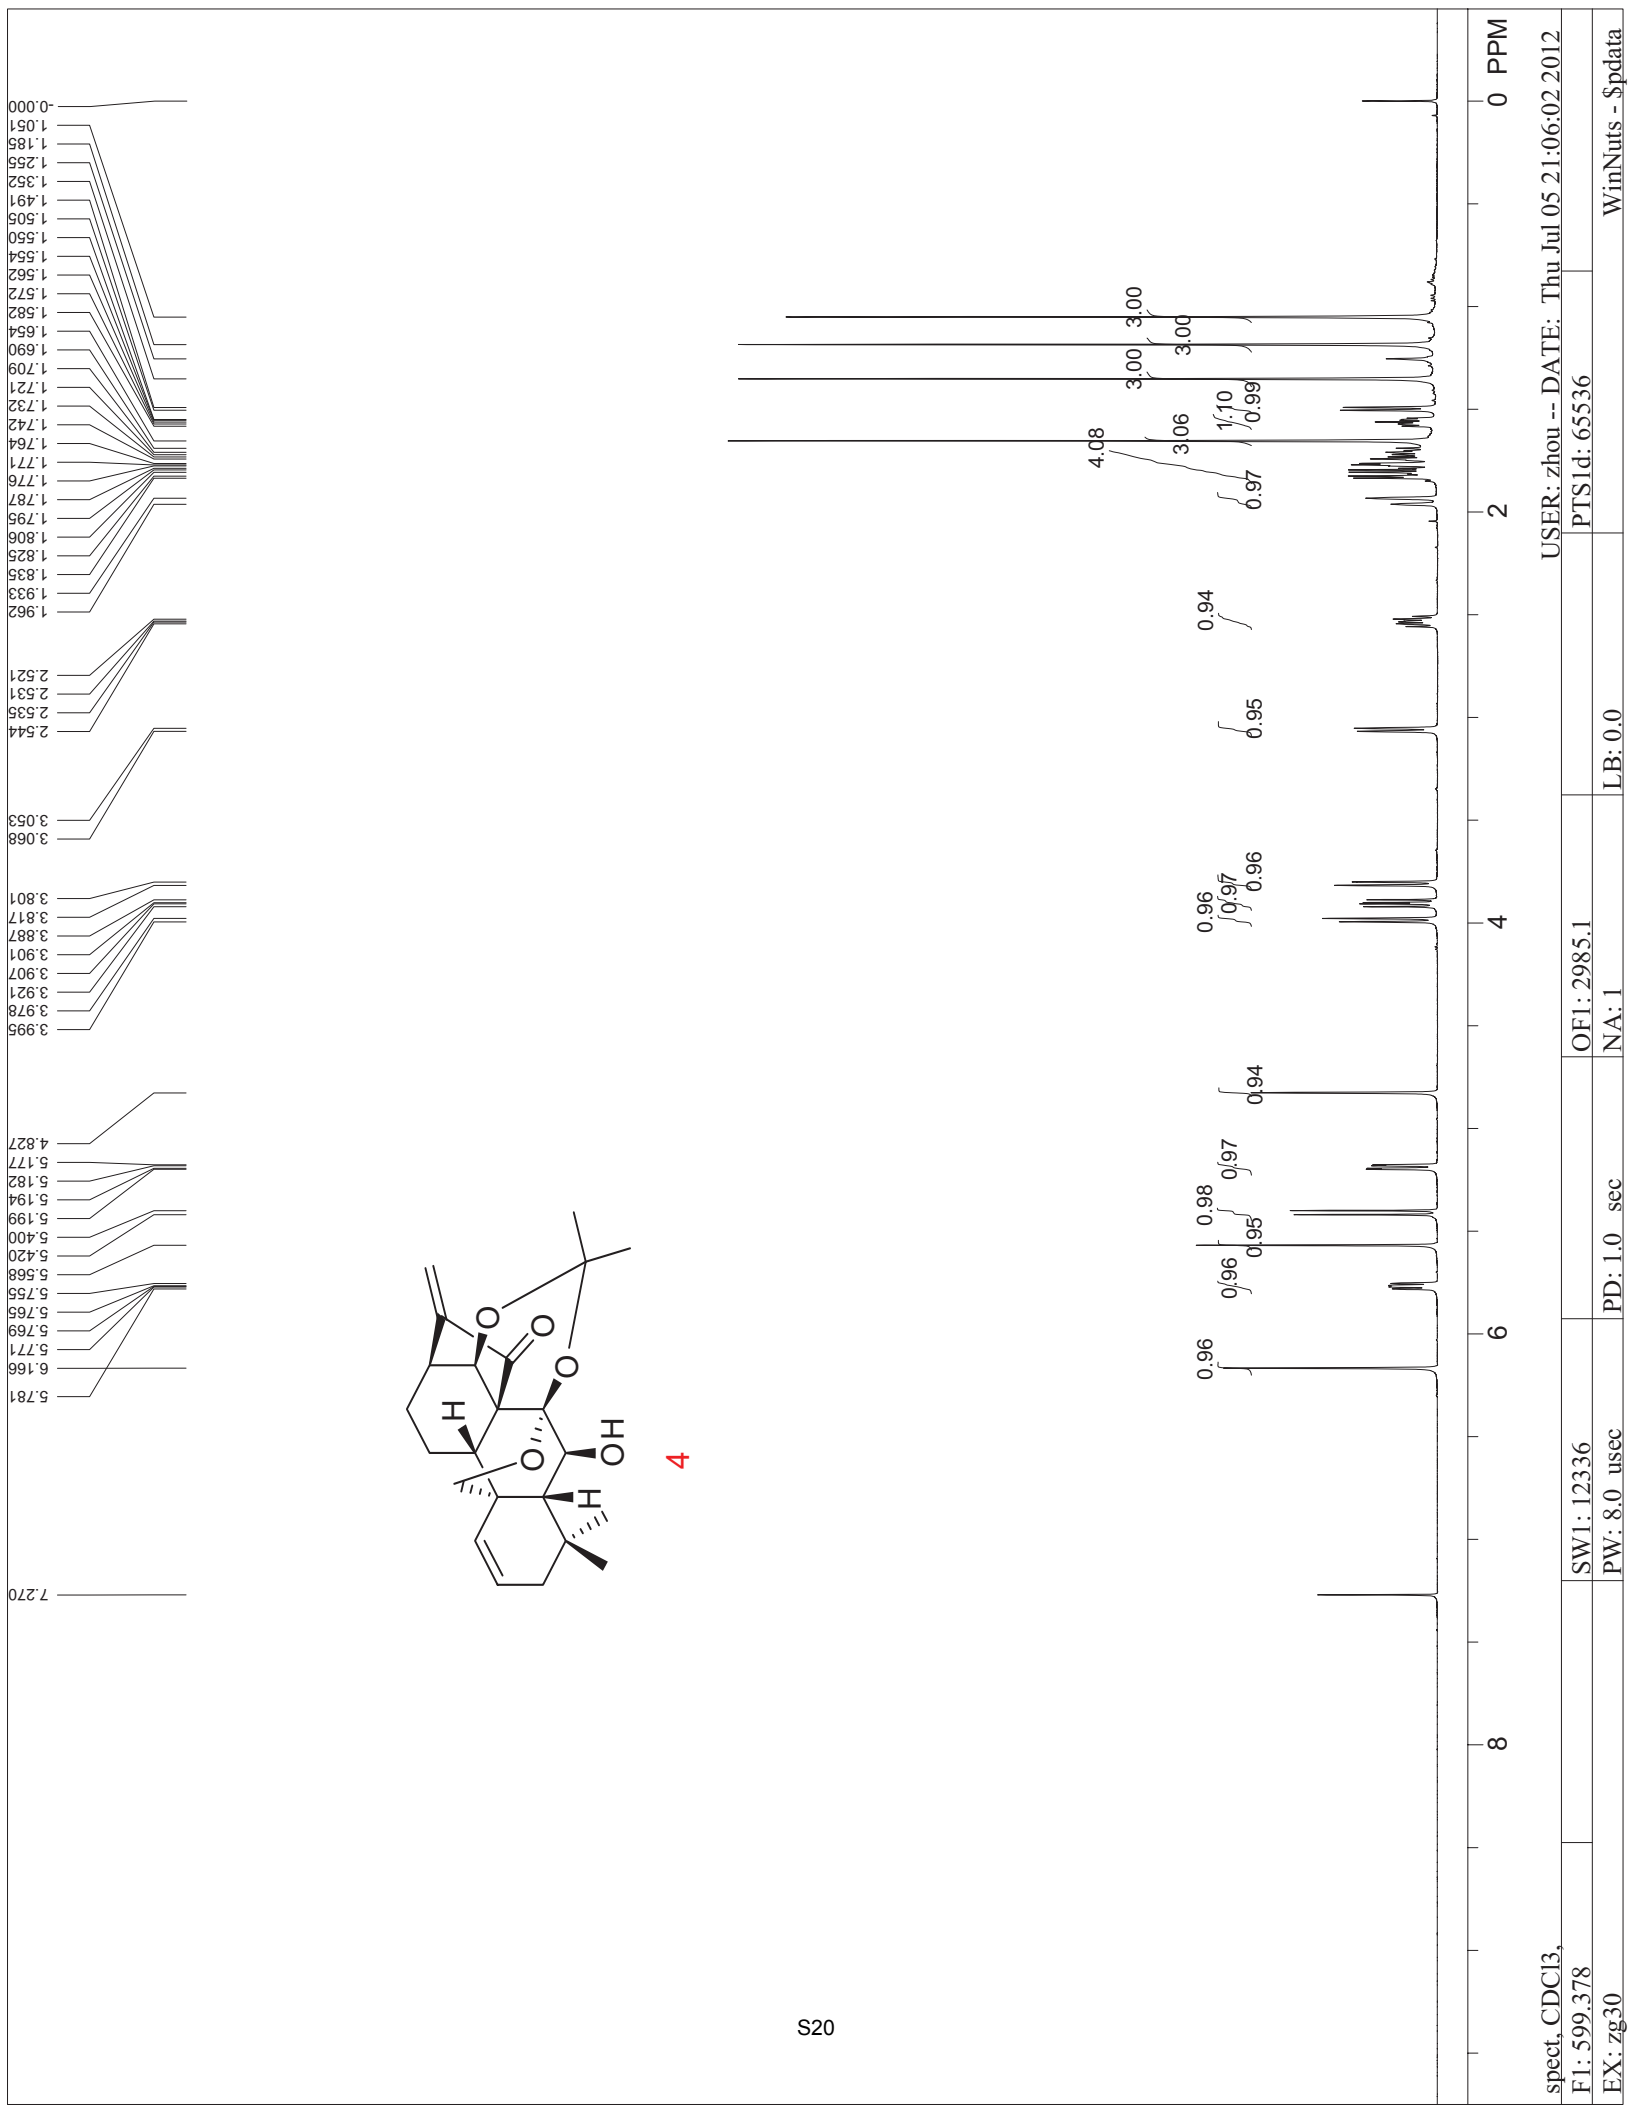

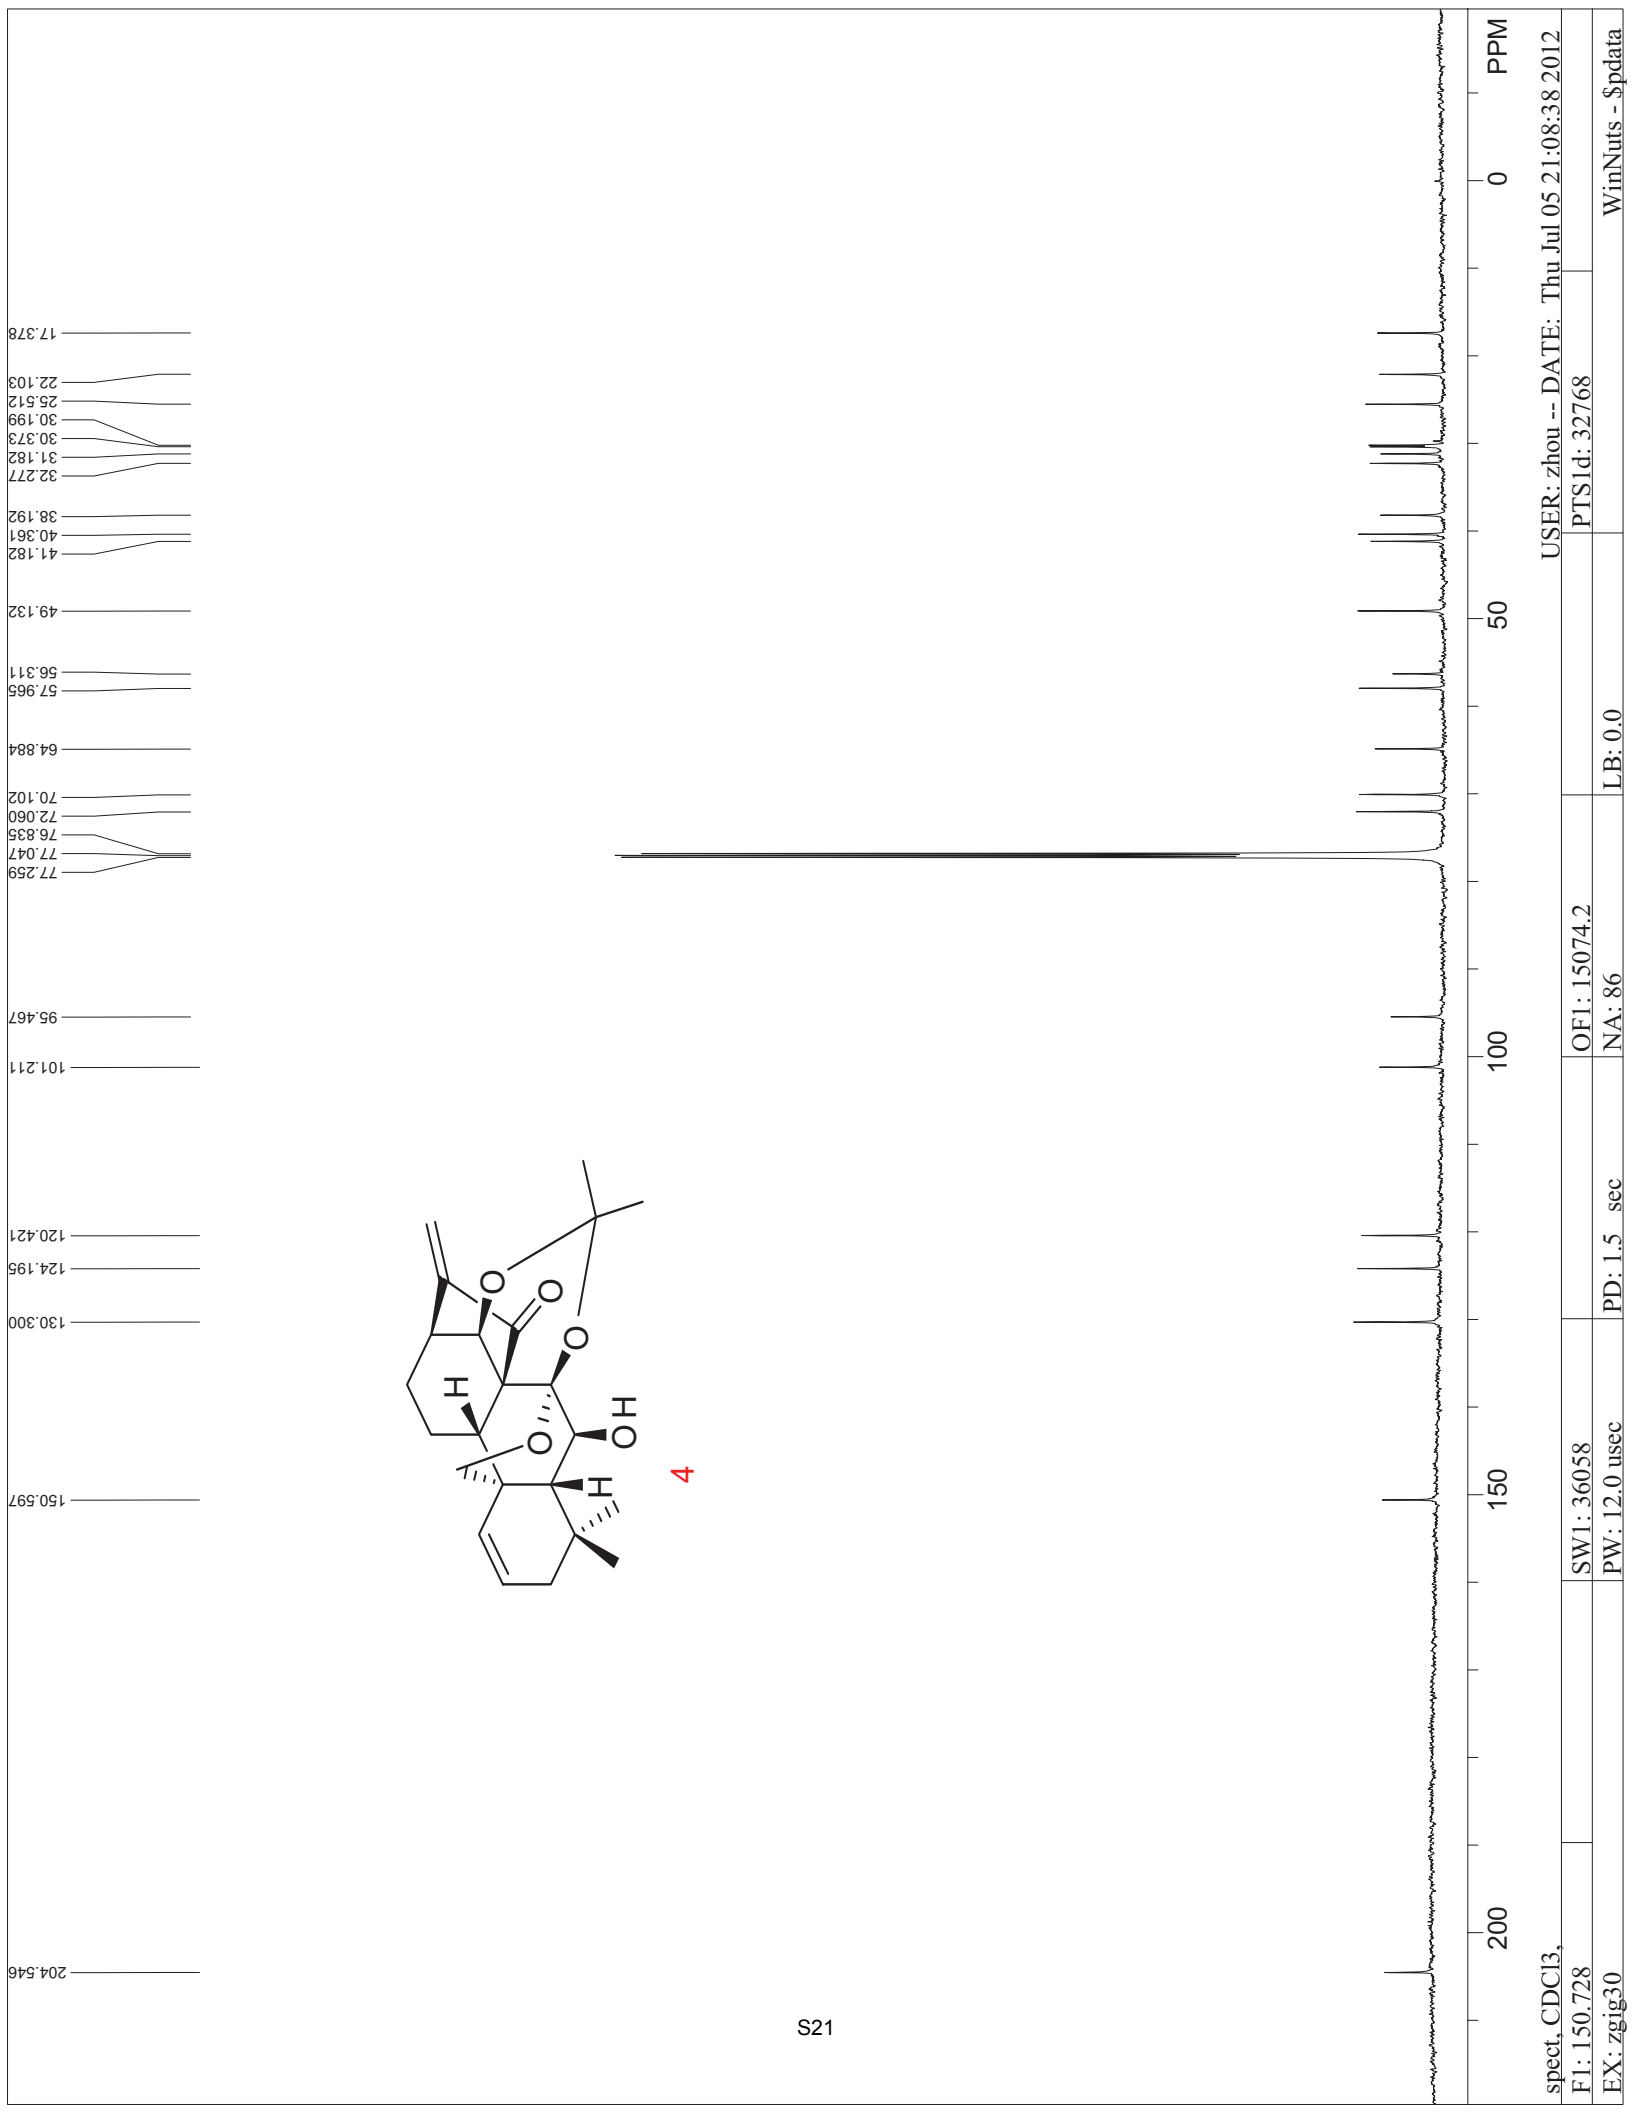

spect, CDCI3, USER: zhou -- DATE: Thu Jul 05 21:08:38 2012  
 F1: 150.728 OF1: 15074.2 PTS1d: 32768  
 EX: zgig30 PD: 1.5 sec NA: 86 LB: 0.0 WinNuts - \$pdata

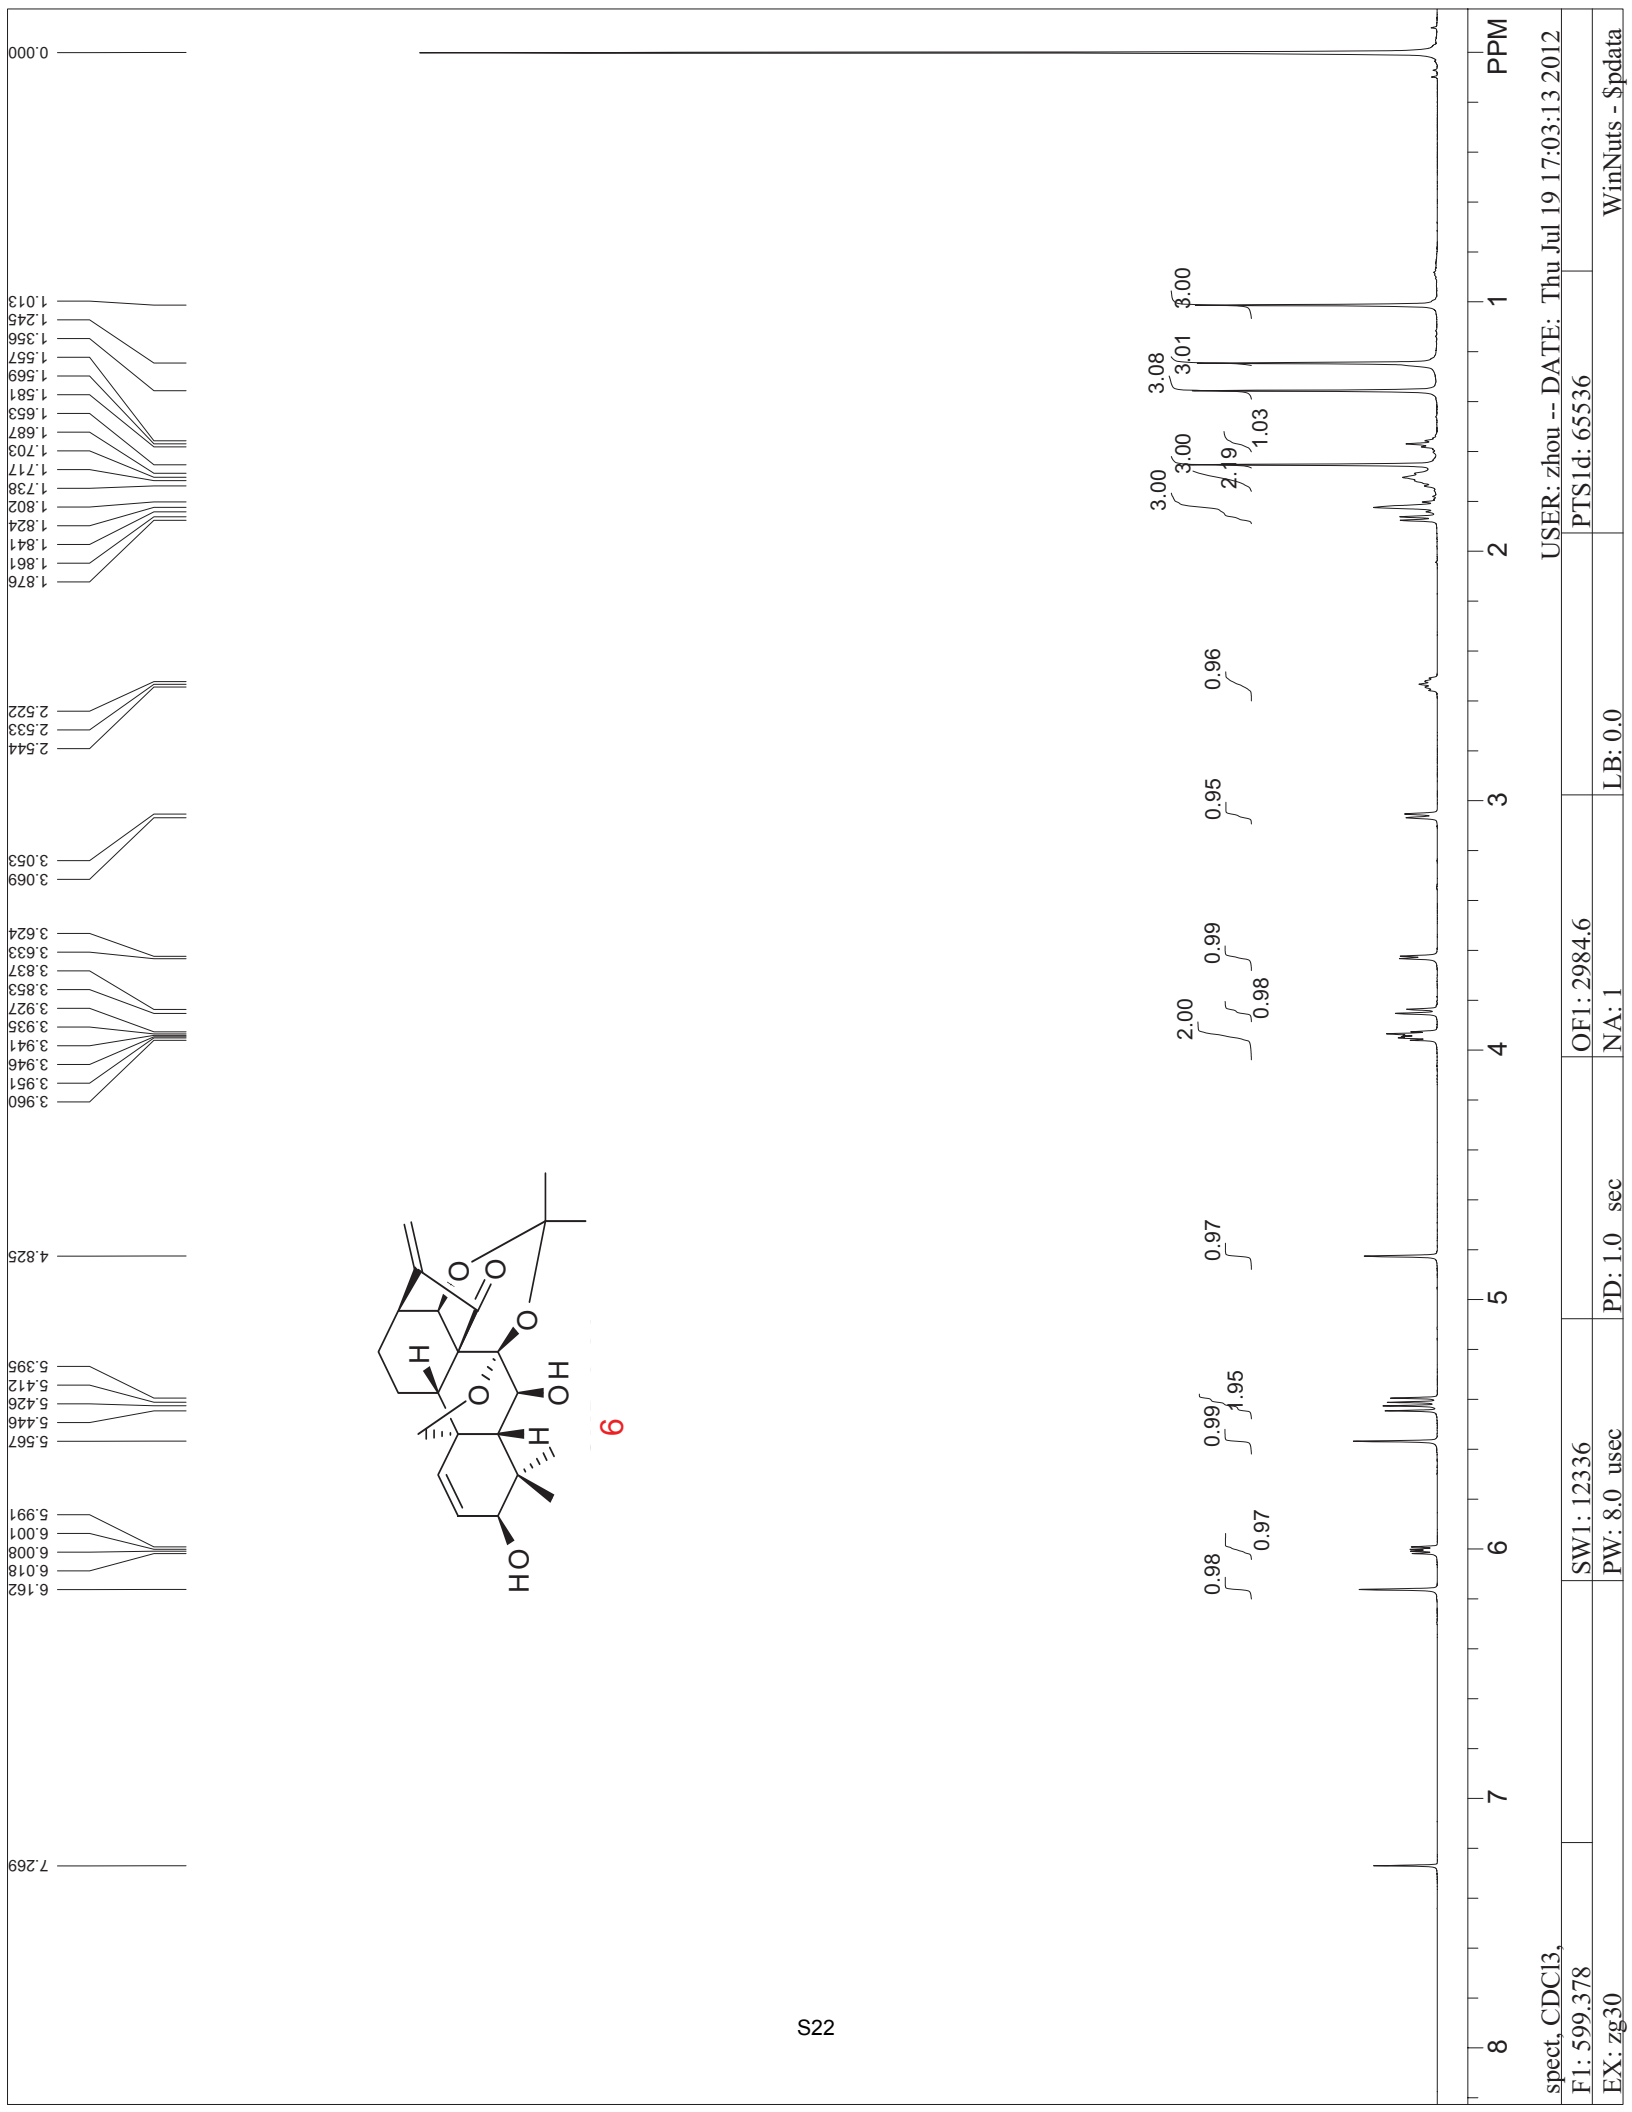

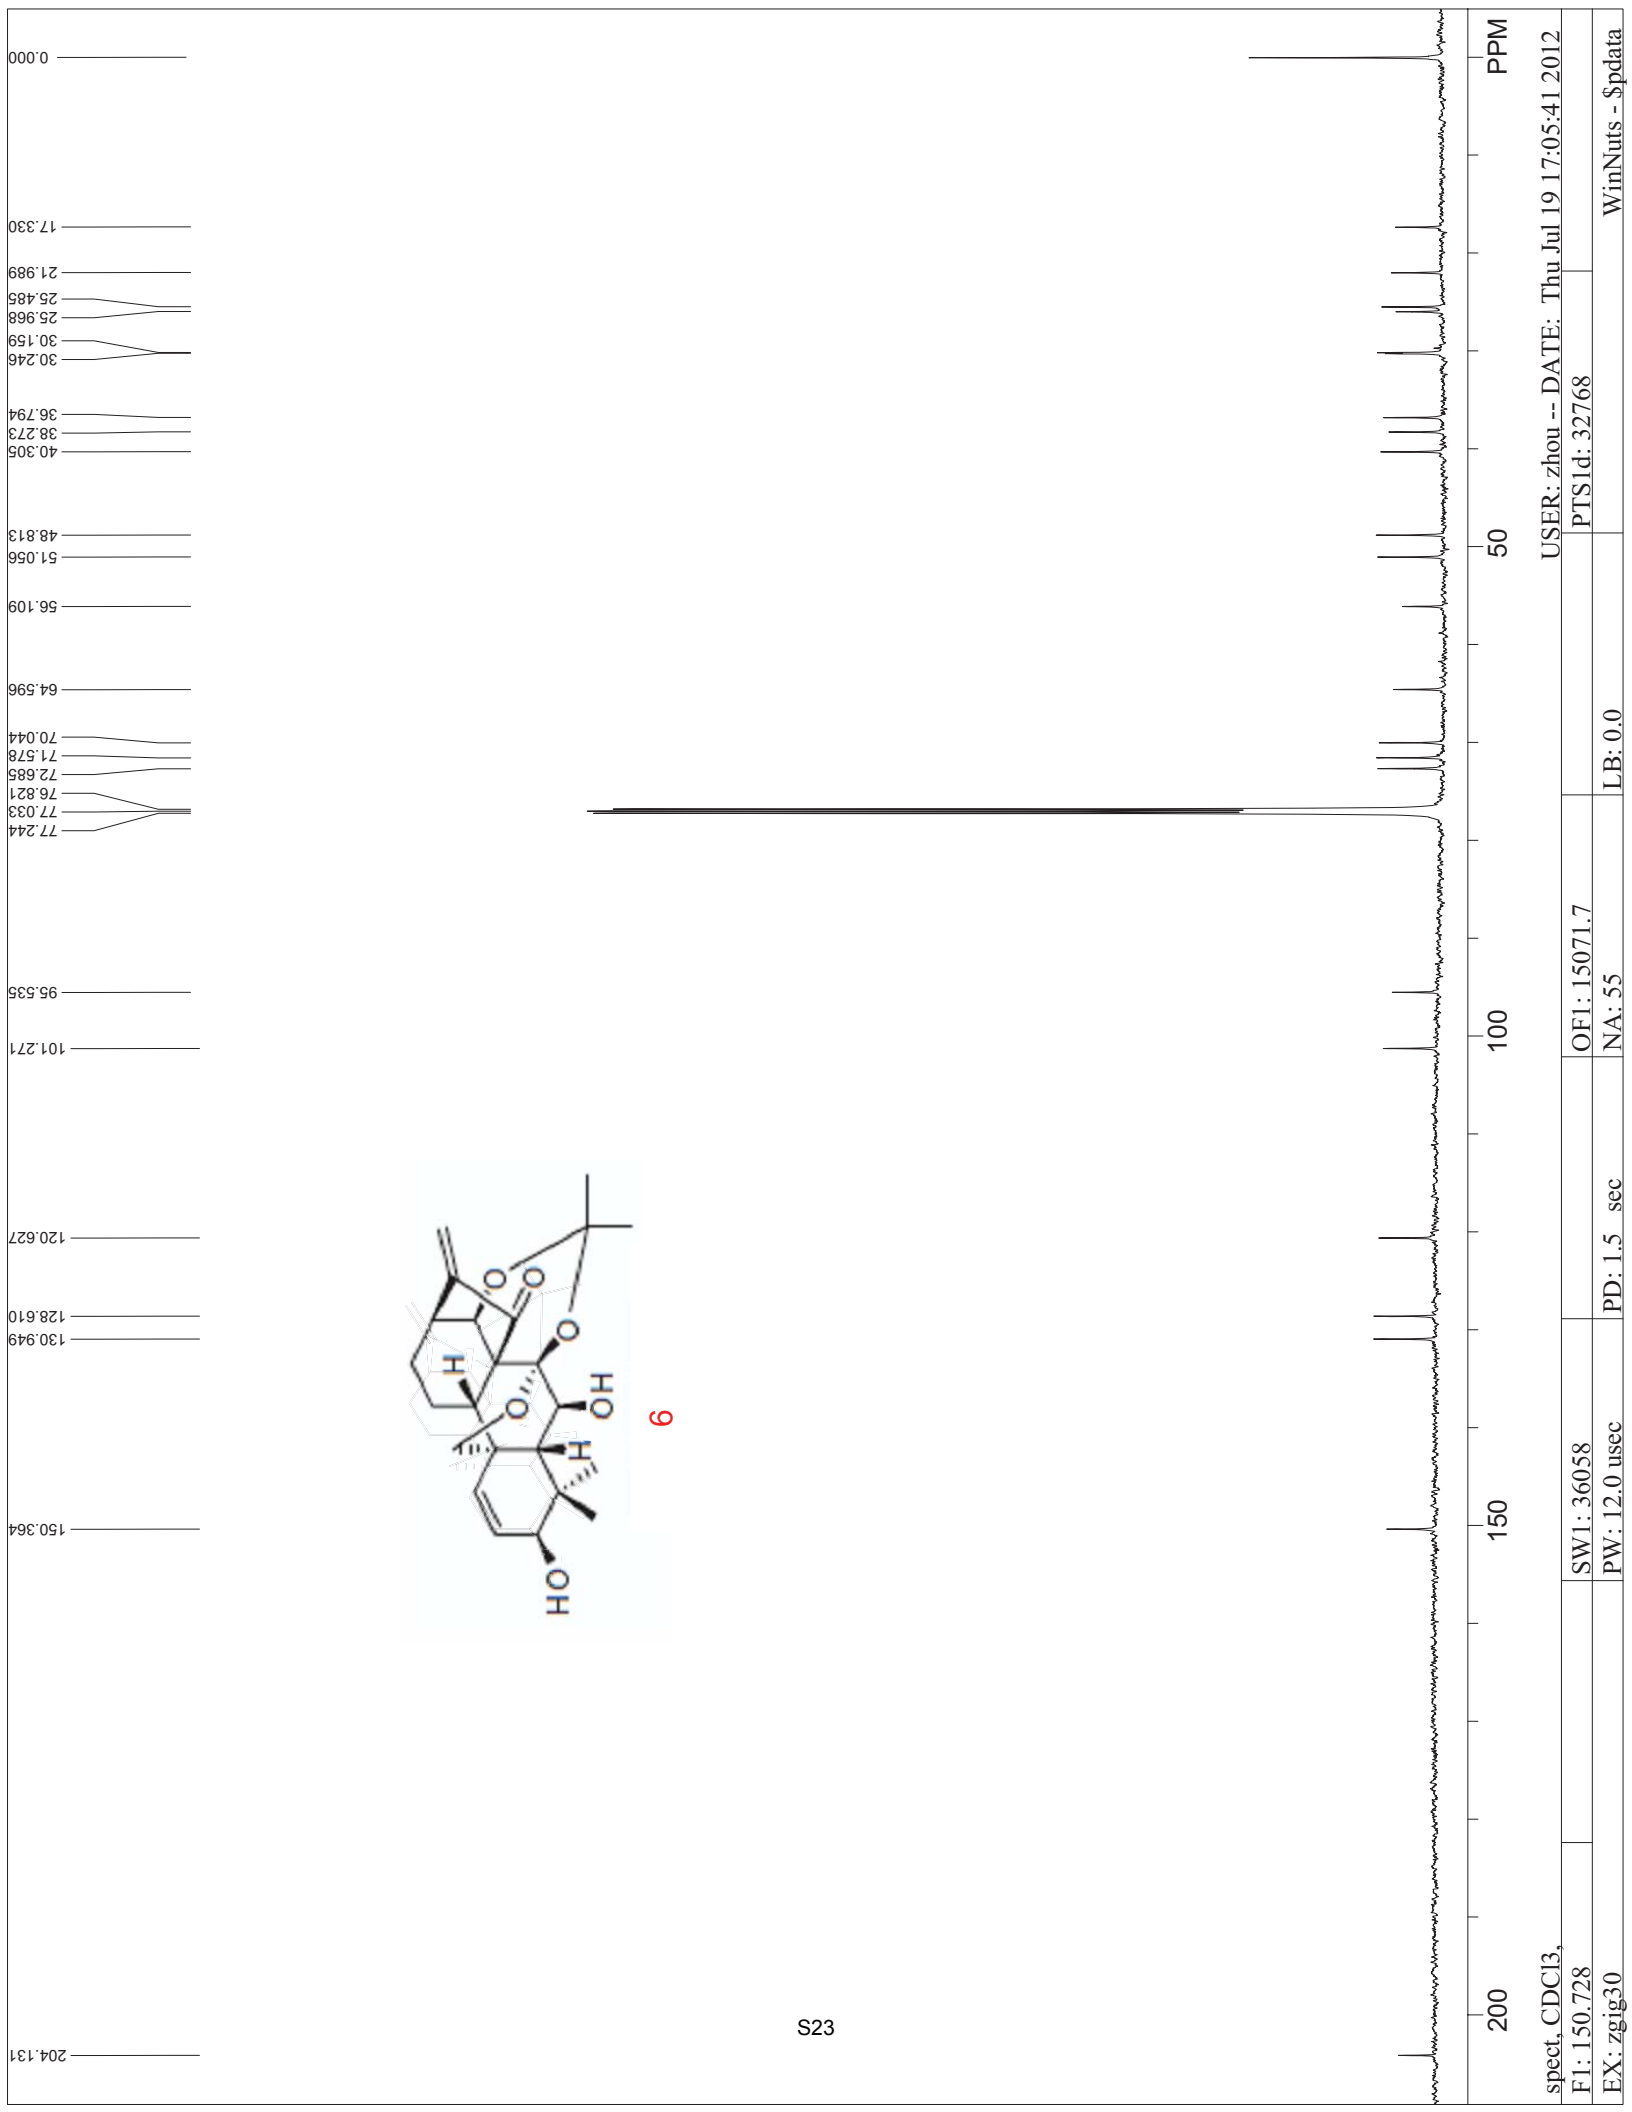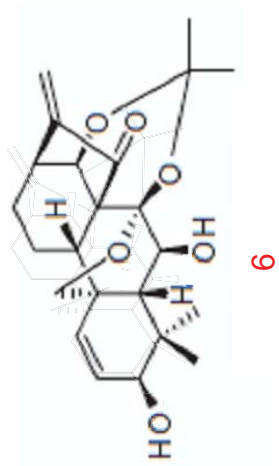

spect, CDCI3, USER: zhou -- DATE: Thu Jul 19 17:05:41 2012  
 F1: 150.728 OF1: 15071.7 PTS1d: 32768  
 EX: zgig30 PW: 12.0 usec PD: 1.5 sec NA: 55 LB: 0.0 WinNuts - \$pdata

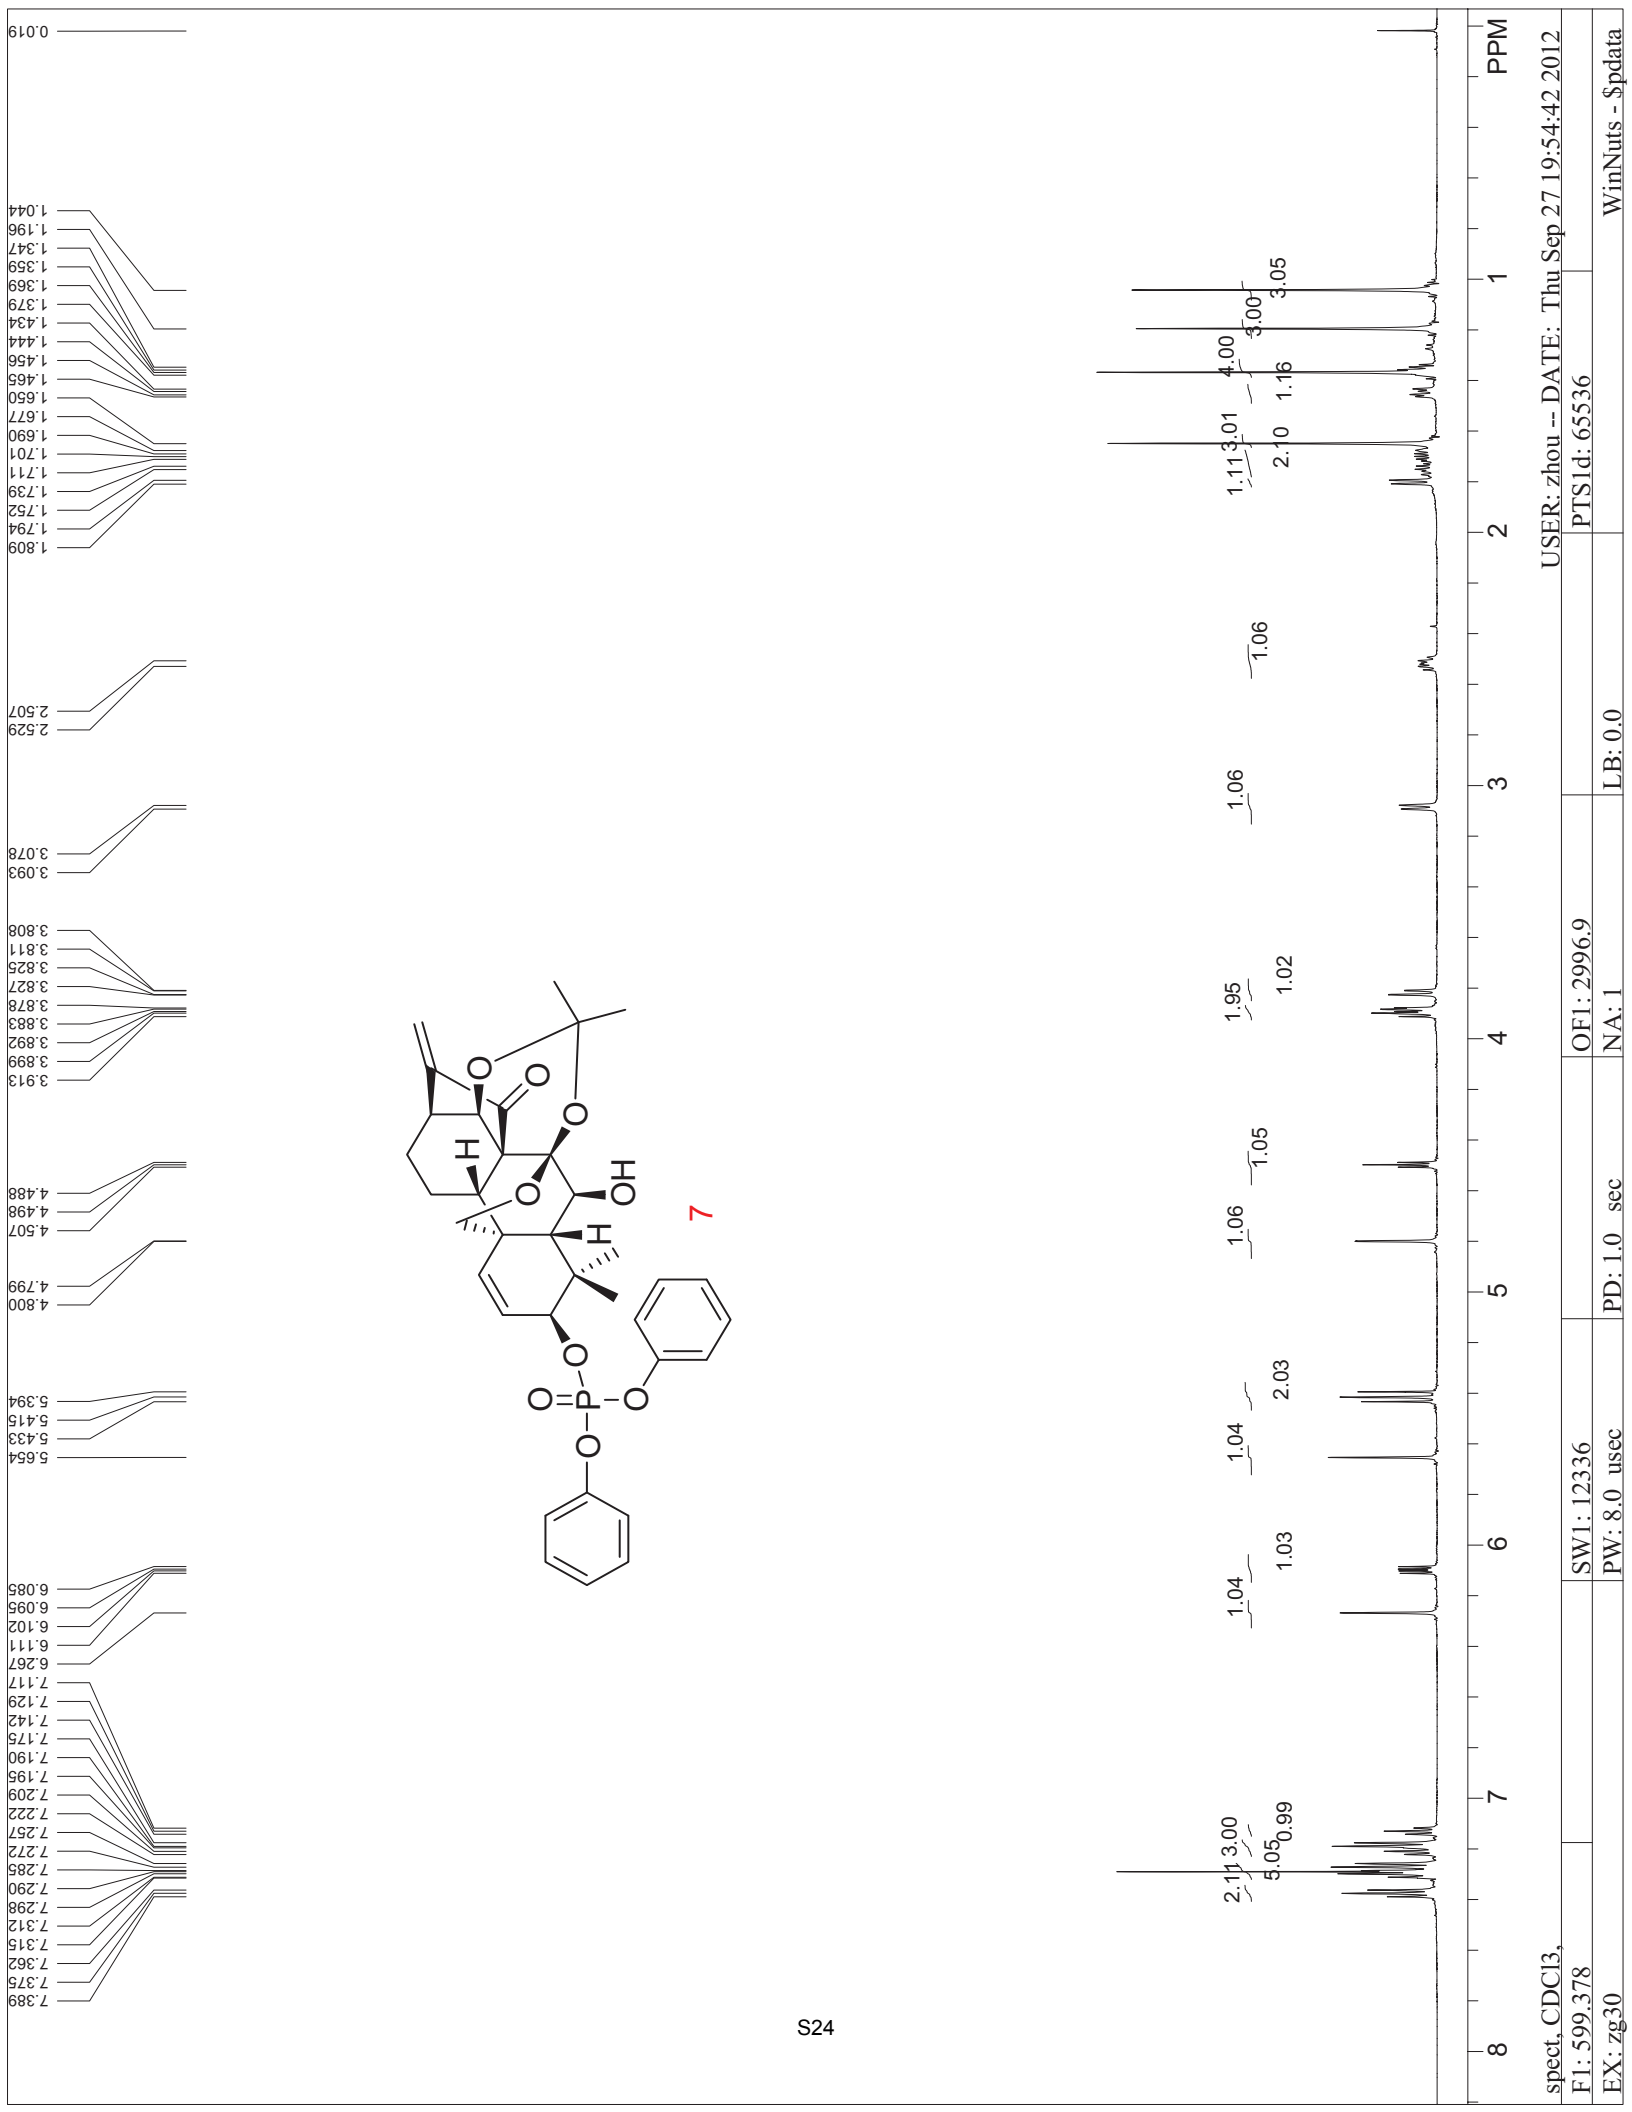

spect, CDCI3, USER: zhou -- DATE: Thu Sep 27 19:54:42 2012  
 F1: 599.378 SW1: 12336 OF1: 2996.9 PTS1d: 65536  
 EX: zg30 PW: 8.0 usec PD: 1.0 sec NA: 1 LB: 0.0 WinNuts - \$pdata



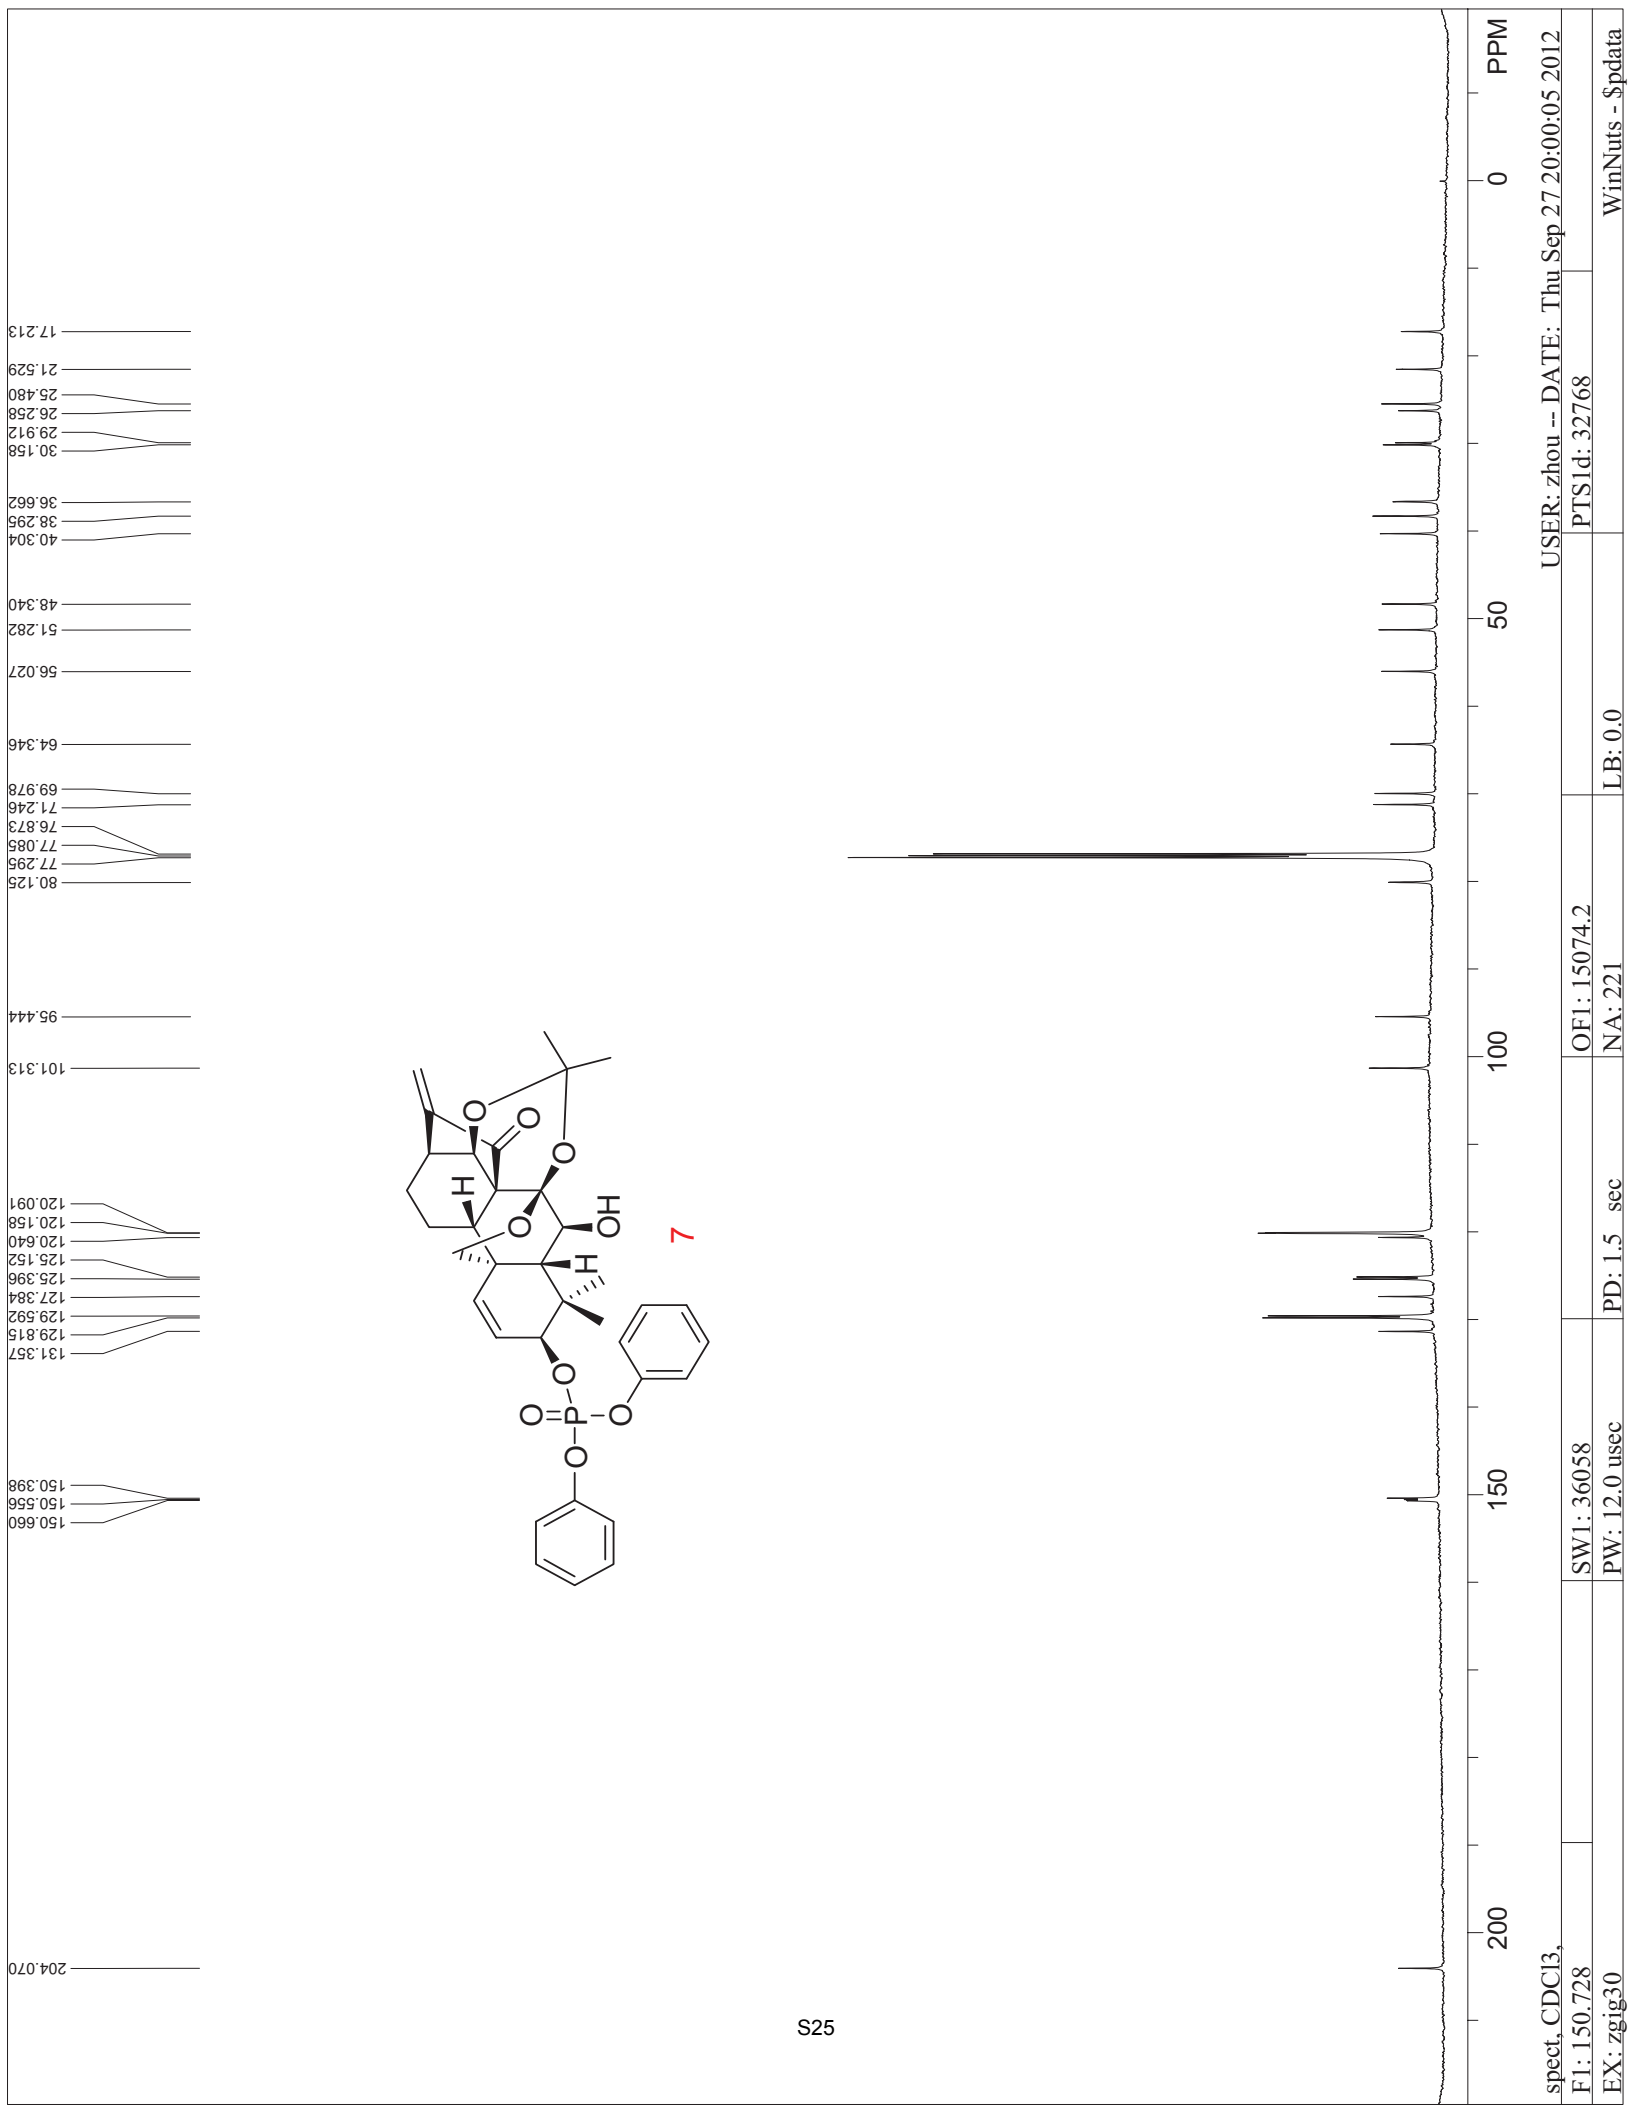

spect, CDCI3, USER: zhou -- DATE: Thu Sep 27 20:00:05 2012  
 F1: 150.728 OF1: 15074.2 PTS1d: 32768  
 EX: zgig30 SW1: 36058 NA: 221 LB: 0.0 WinNuts - \$pdata  
 PD: 1.5 sec PW: 12.0 usec

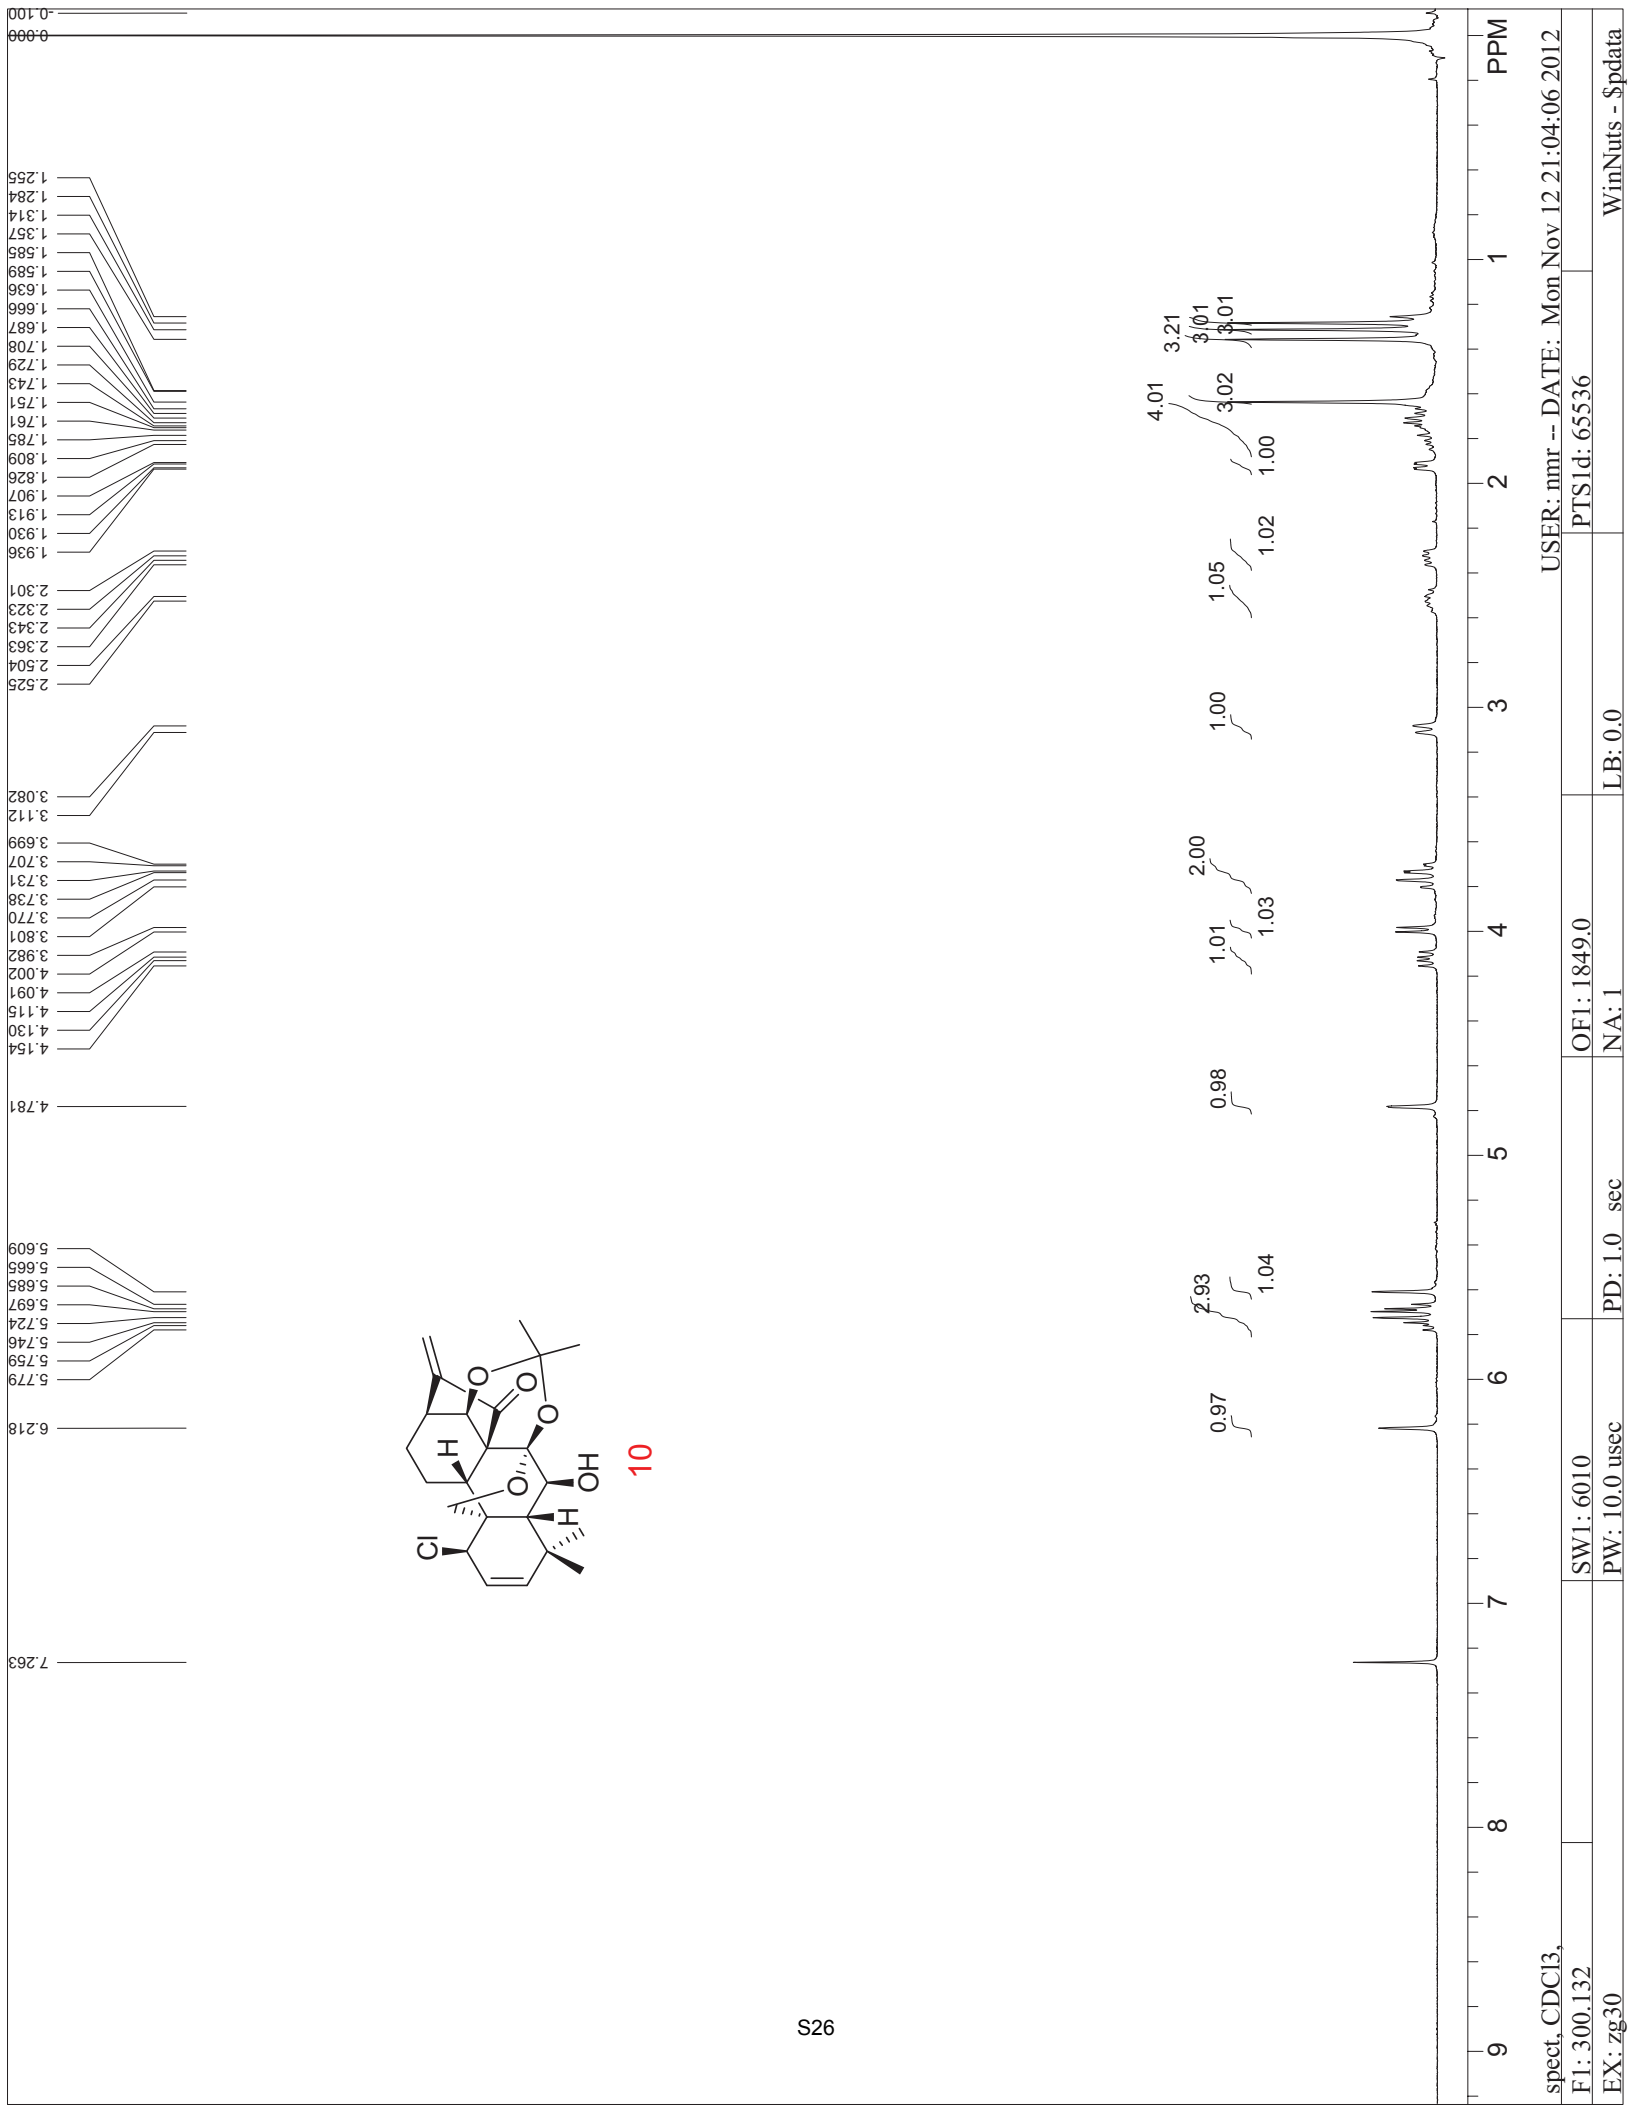

spect, CDC13, USER: nmr -- DATE: Mon Nov 12 21:04:06 2012  
 F1: 300.132 OF1: 1849.0 PTS1d: 65536  
 EX: zg30 NA: 1 LB: 0.0 WinNuts - \$pdata  
 SW1: 6010 PD: 1.0 sec  
 PW: 10.0 usec

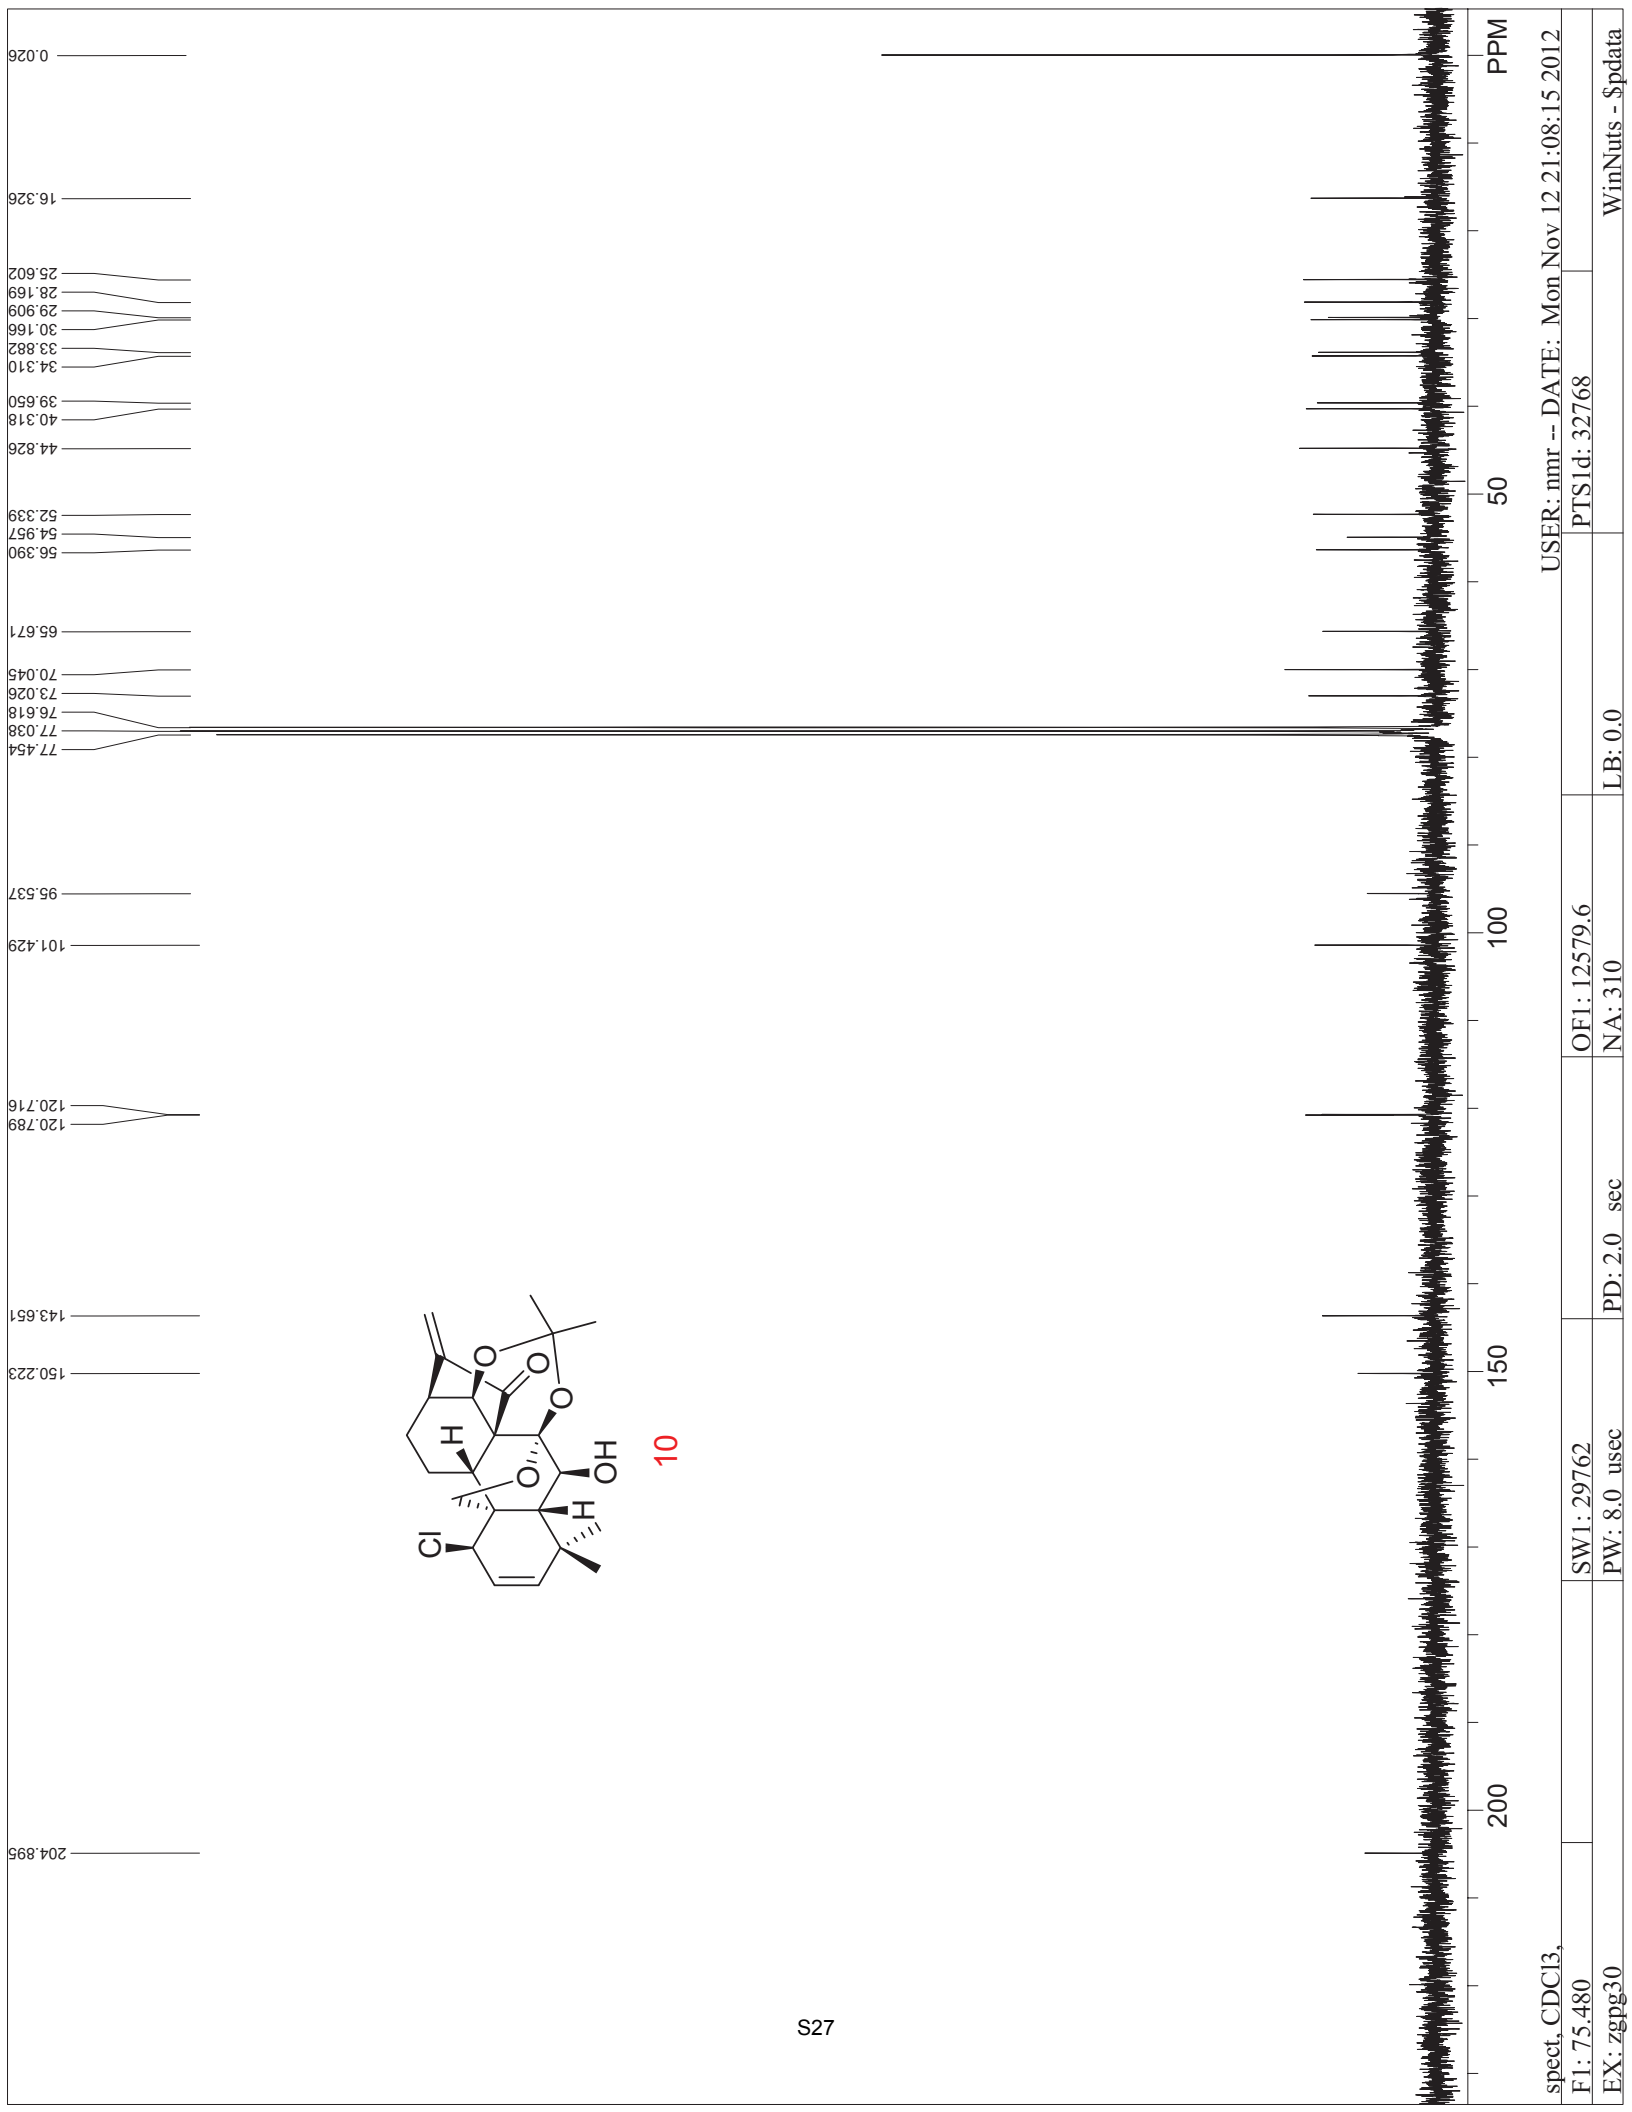

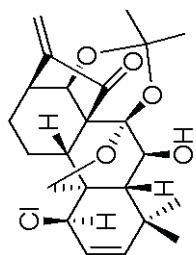

10, HMQC

hmqc\_cy 3 1 /opt/topspin3.0/data/tzwang/nmr

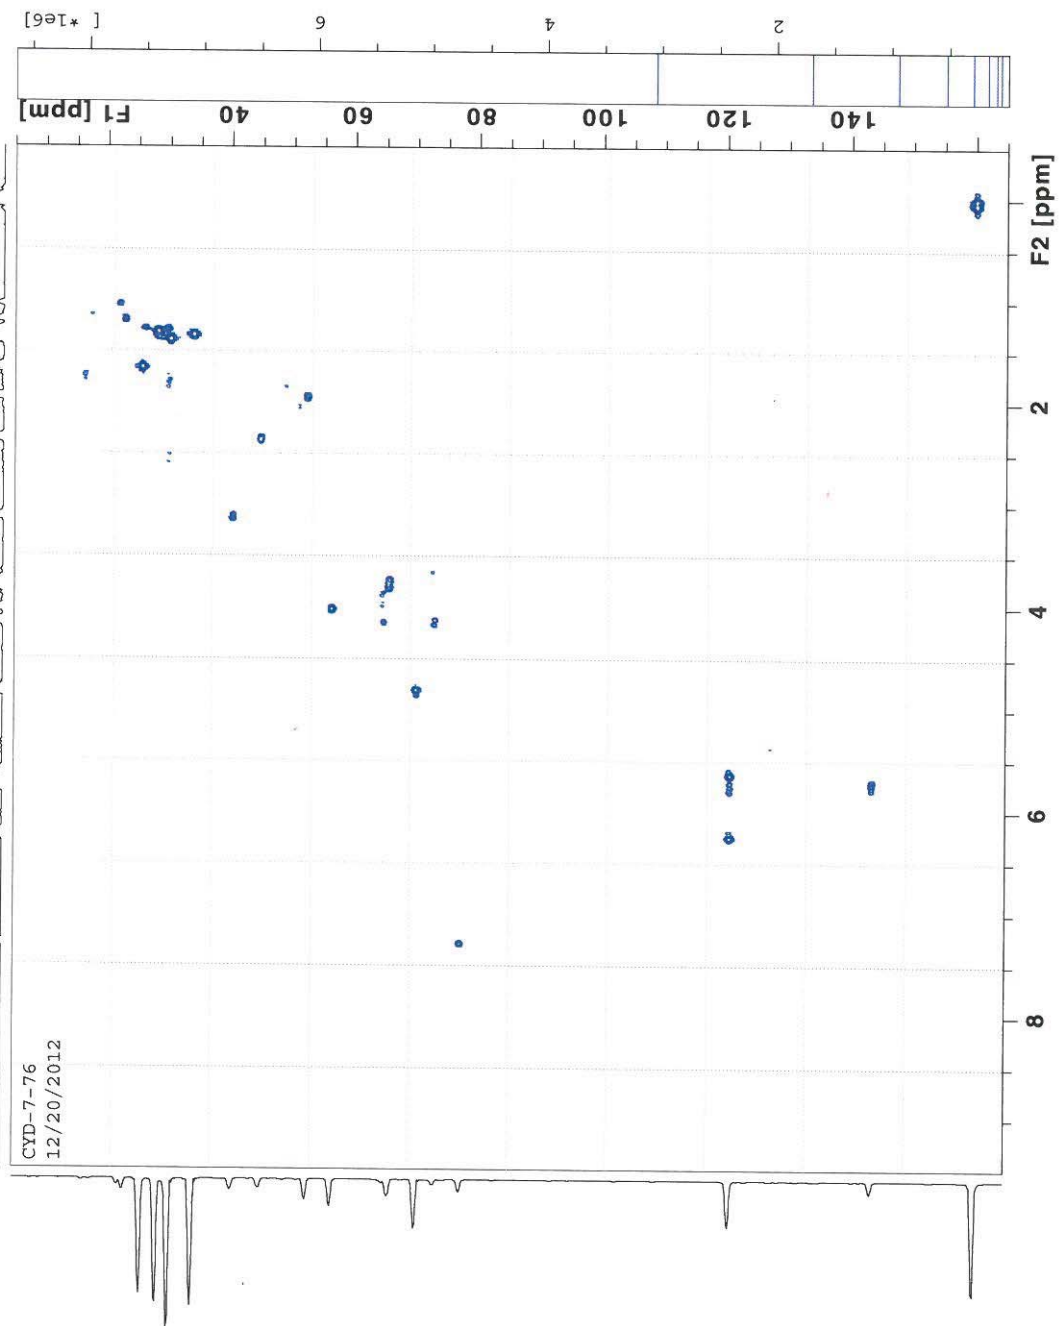

750MHz

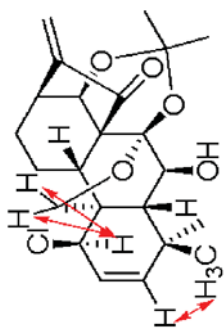

10, NOESY

noesy-org 24 1 /opt/topspin3.0/data/tzwang/nmr

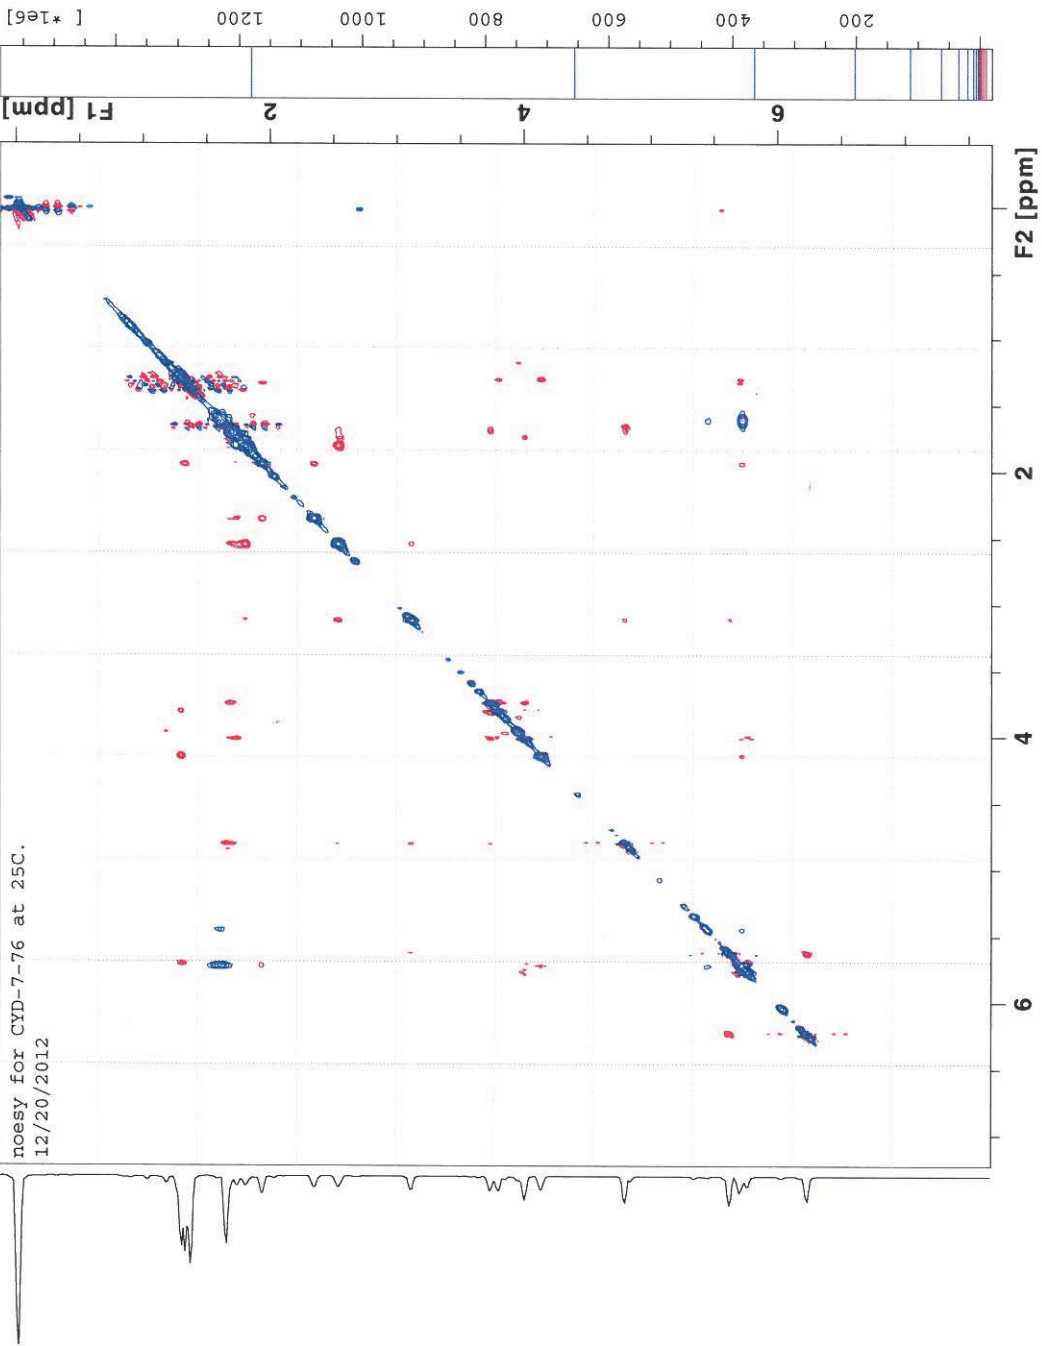

750 Hz

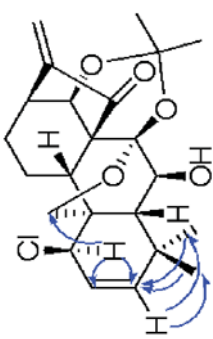

10, HMBC

hmbc\_cy 3 1 /opt/topspin3.0/data/tzwang/nmr

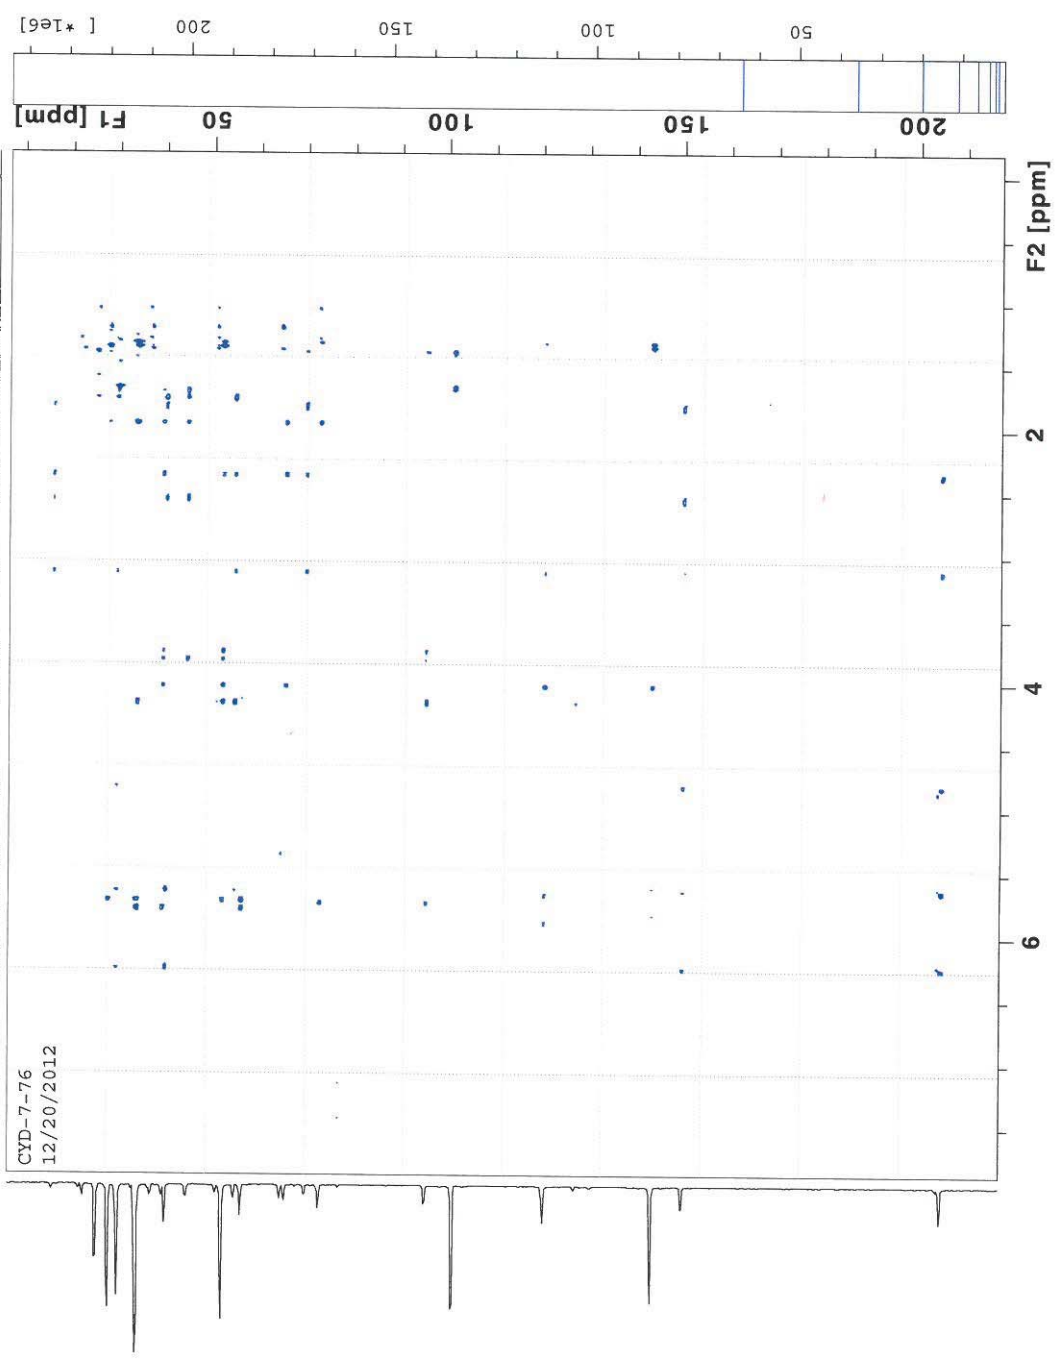

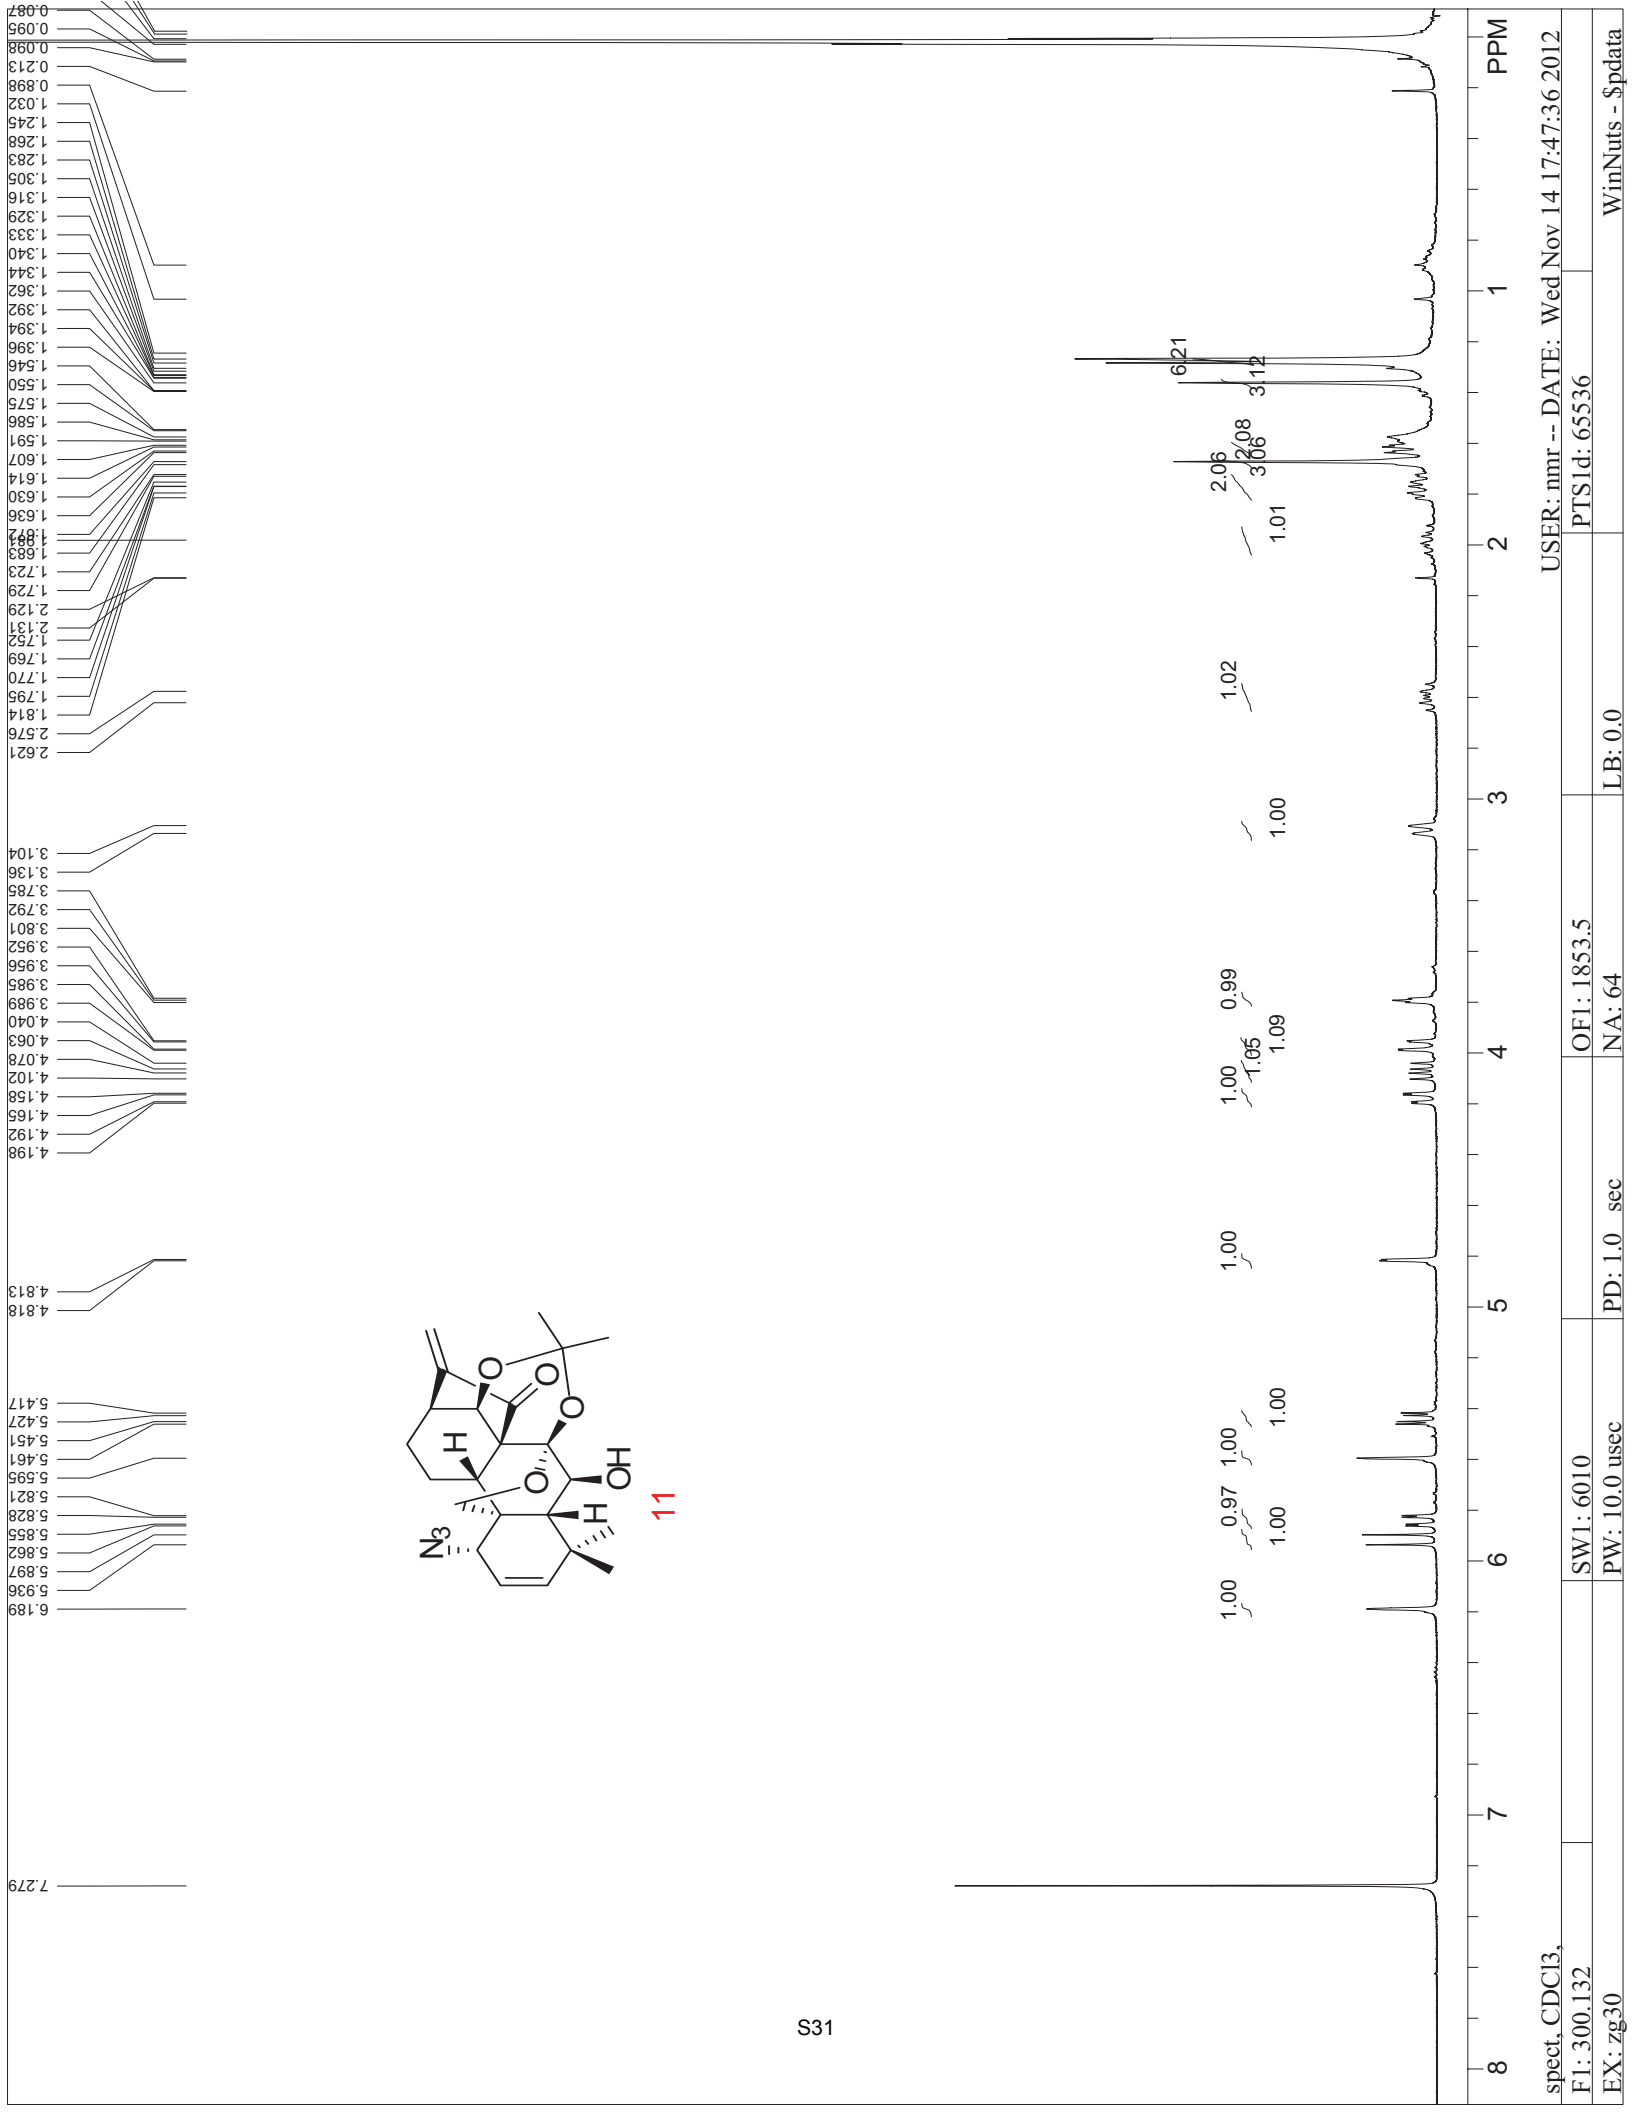

spect, CDCI3, USER: nmr -- DATE: Wed Nov 14 17:47:36 2012  
 F1: 300.132 OF1: 1853.5 PTS1d: 65536  
 EX: zg30 PW: 10.0 usec PD: 1.0 sec NA: 64 LB: 0.0  
 WinNuts - \$pdata

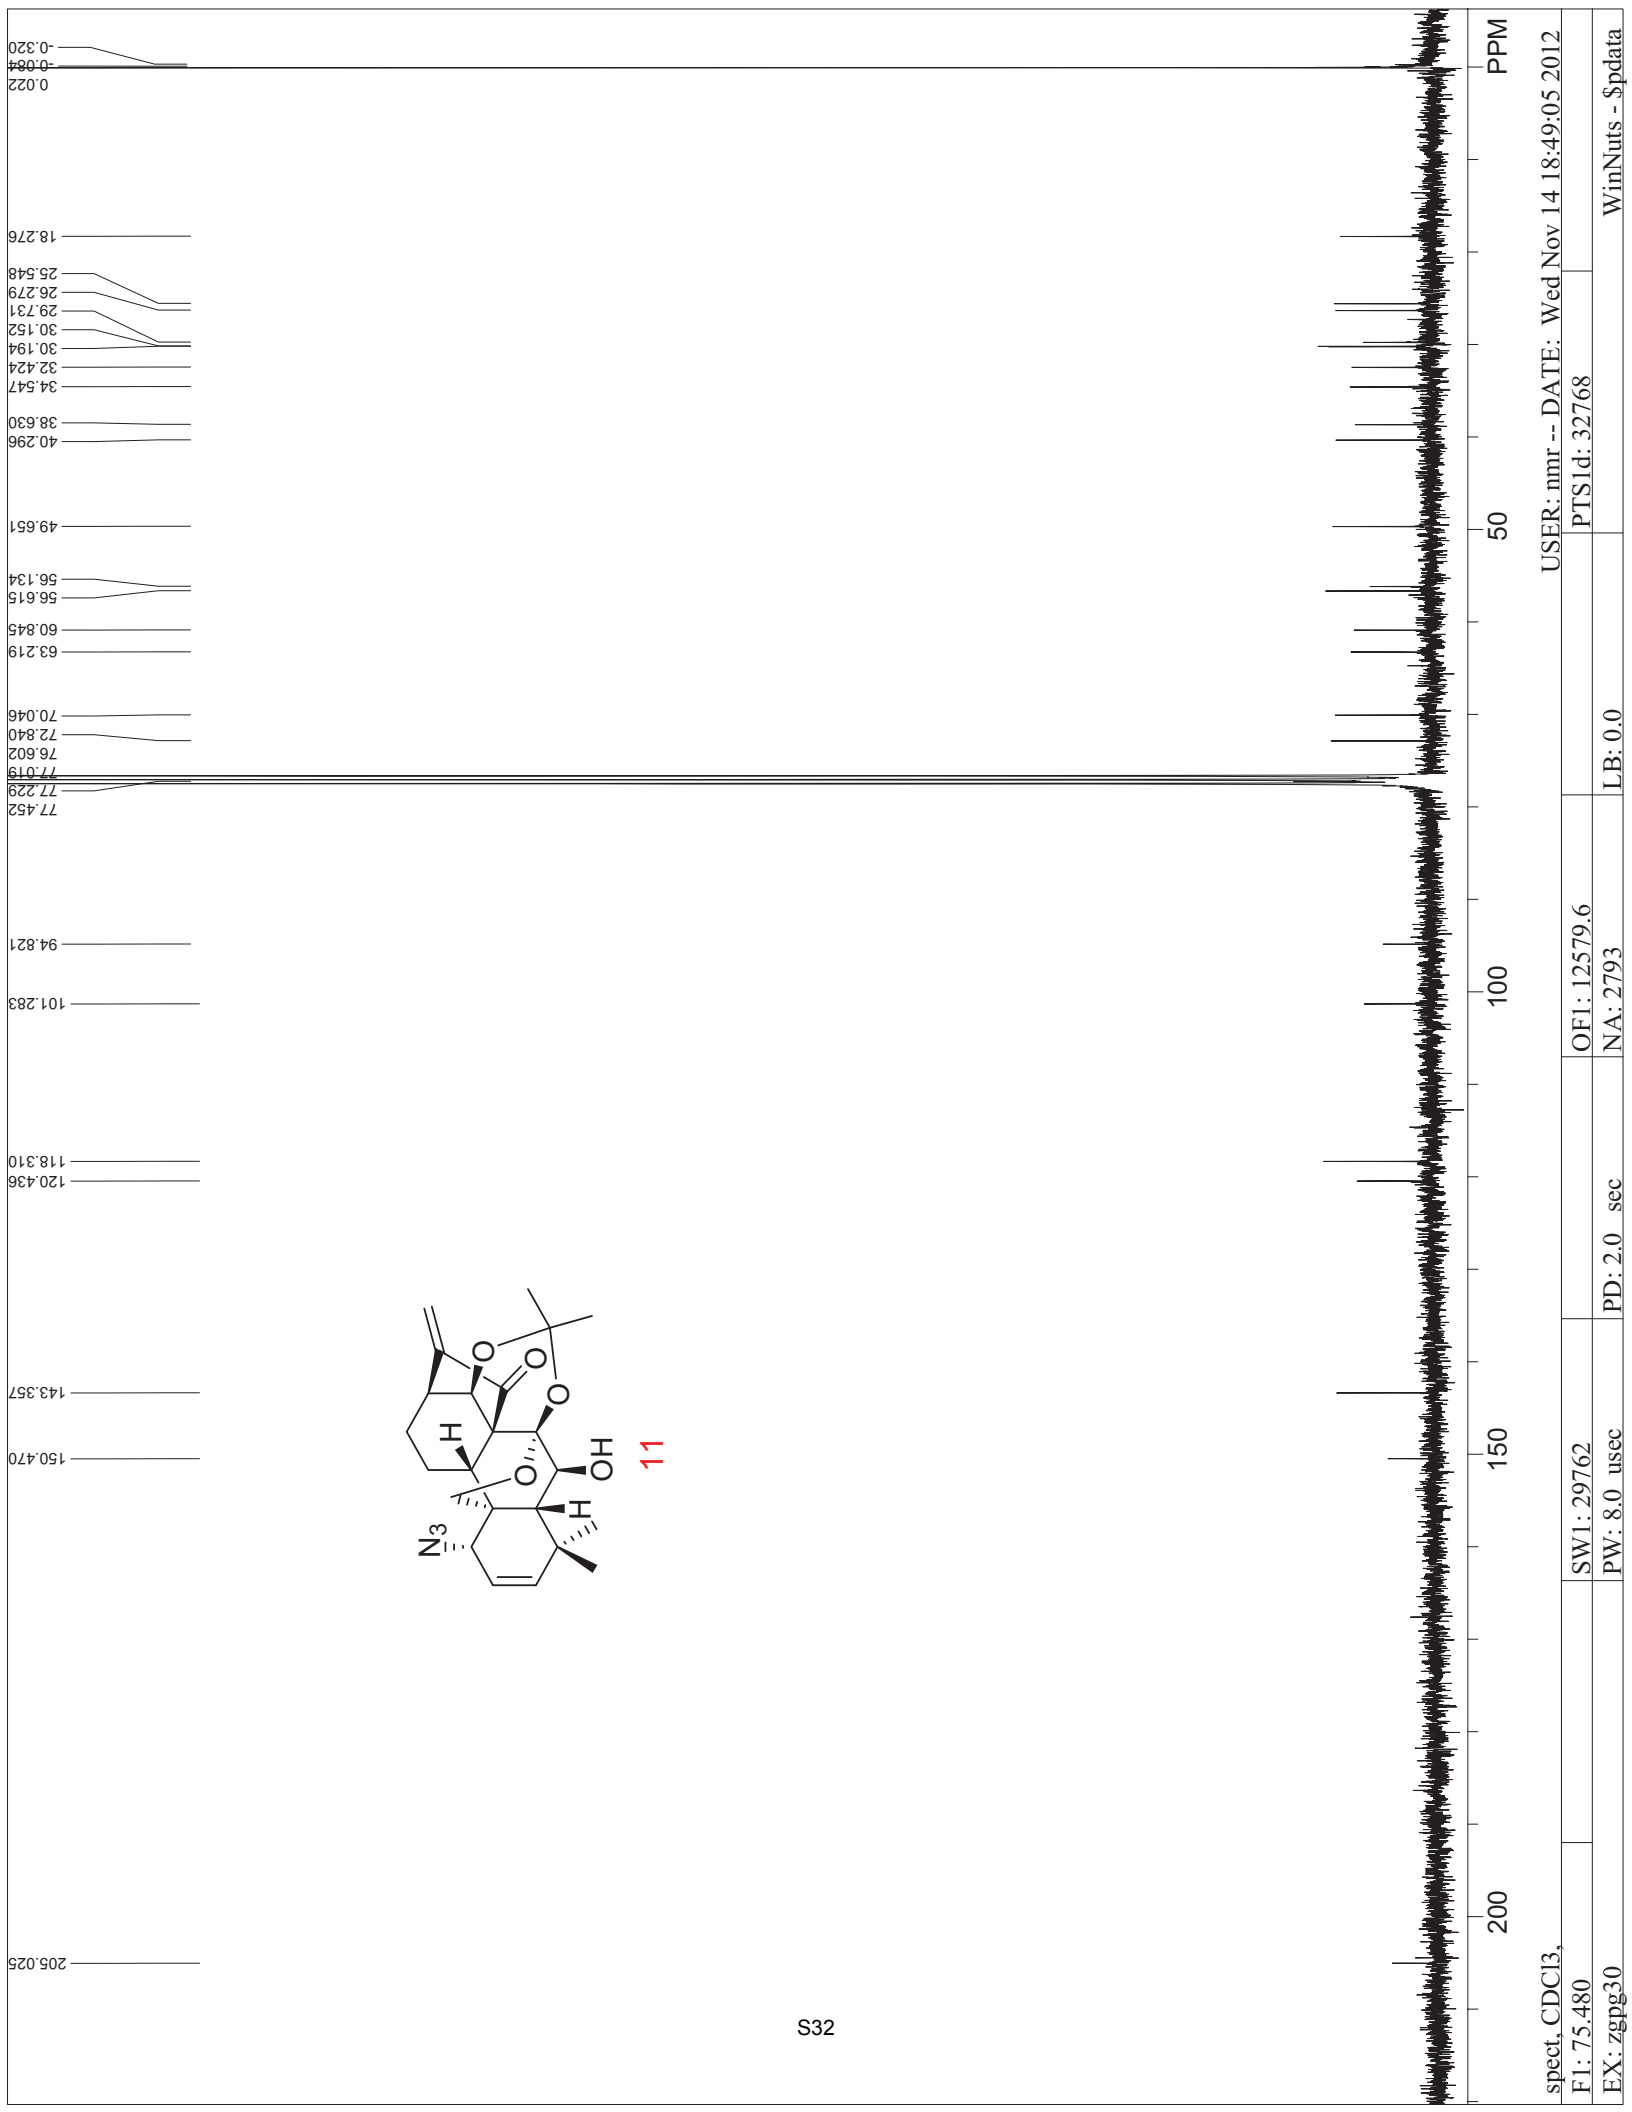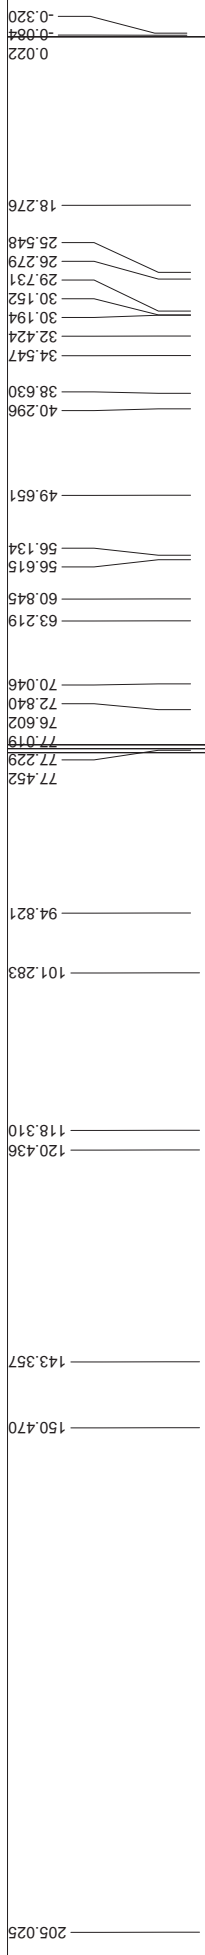

PPM

50

100

150

200

USER: nmr -- DATE: Wed Nov 14 18:49:05 2012

PTS1d: 32768

OF1: 12579.6

NA: 2793

SW1: 29762

PW: 8.0 usec

PD: 2.0 sec

LB: 0.0

WinNuts - \$pdata



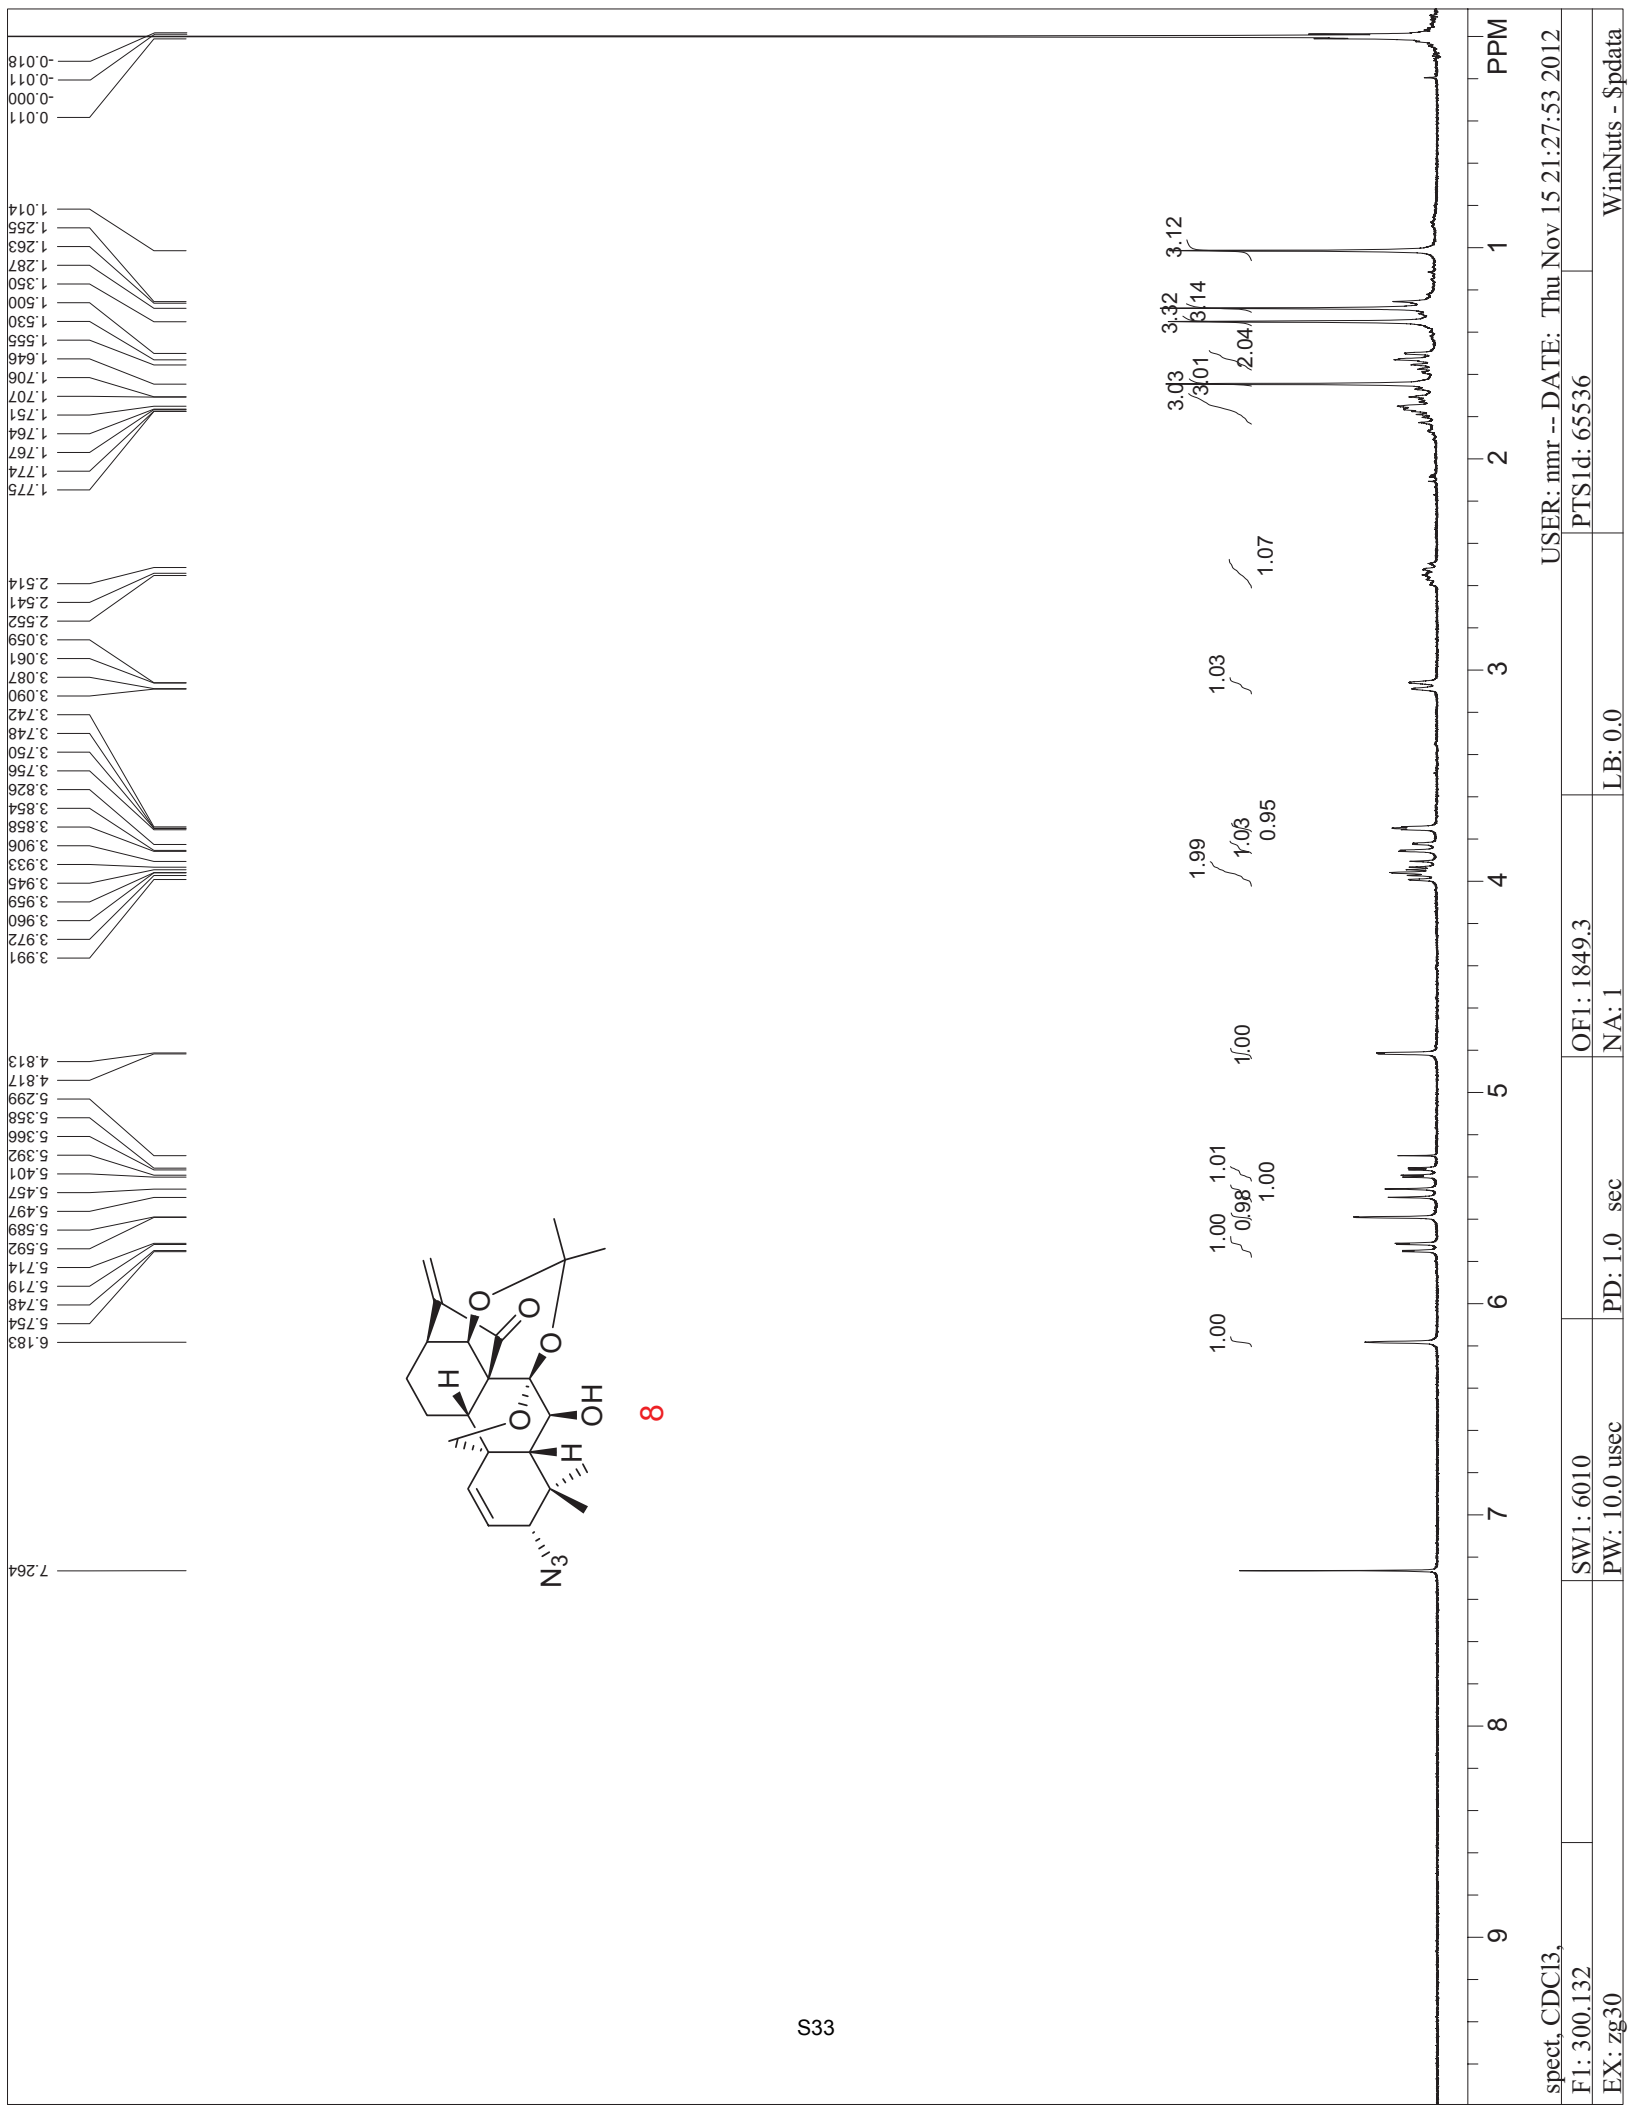

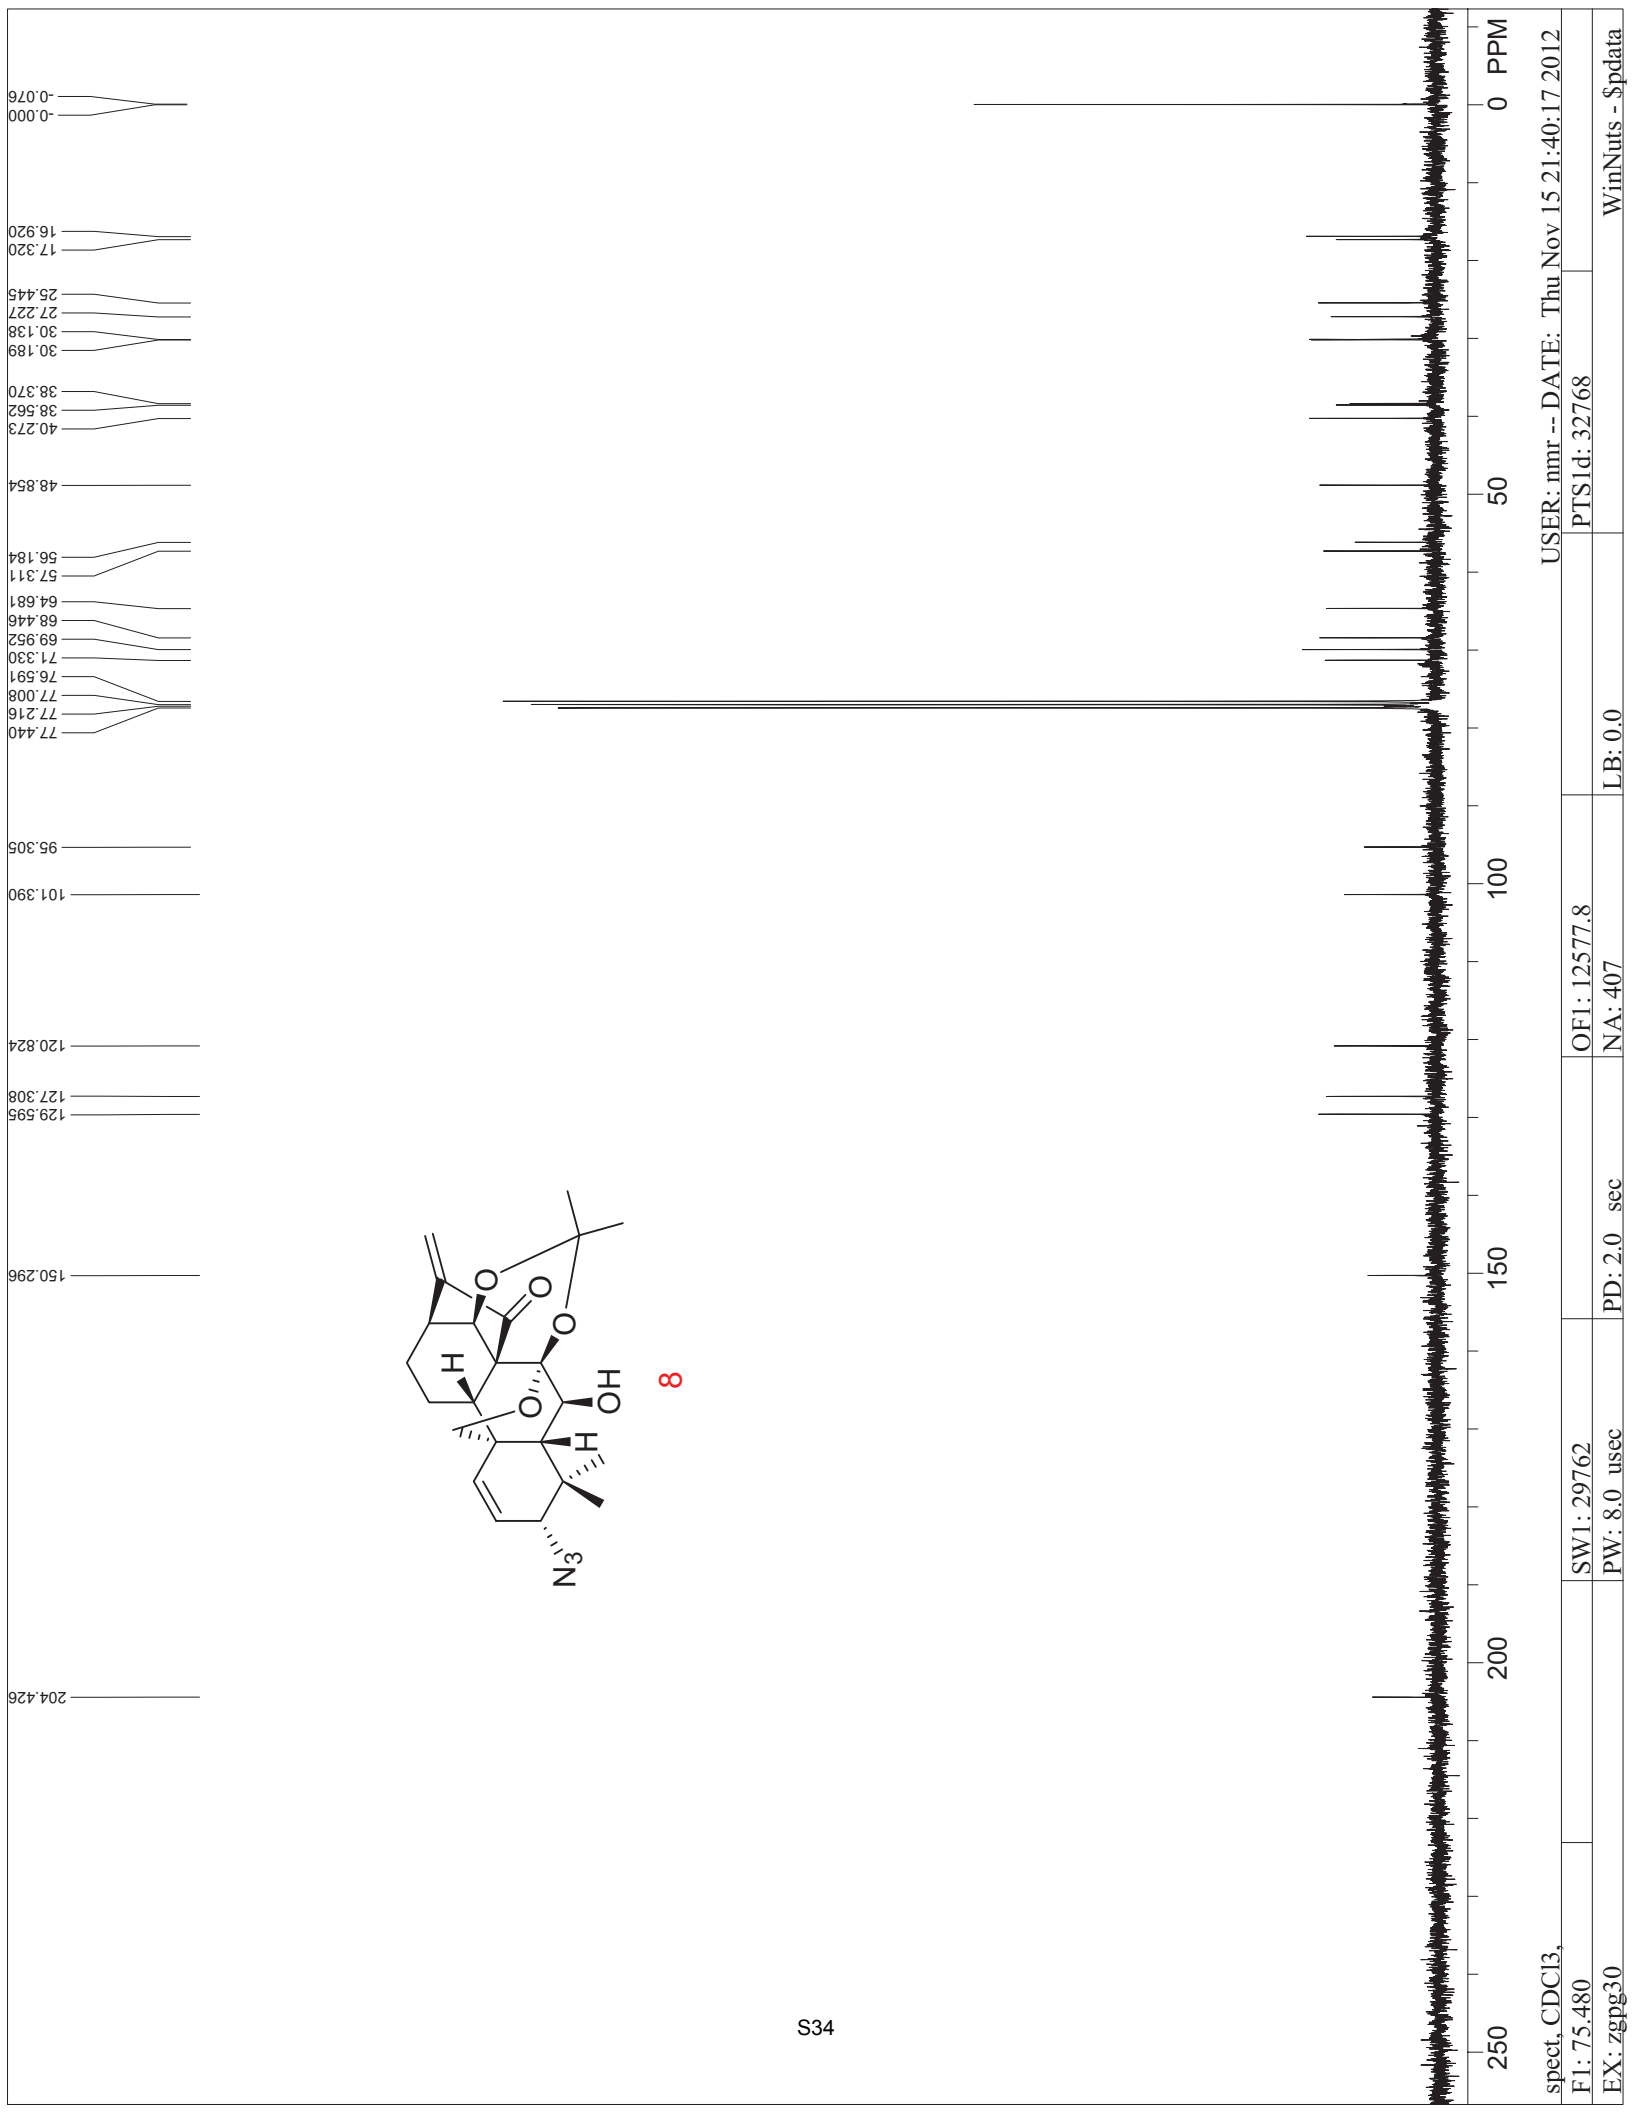

spect, CDCI3, USER: mmr --- DATE: Thu Nov 15 21:40:17 2012  
 F1: 75.480 OF1: 12577.8 PTS1d: 32768  
 EX: zgpg30 PD: 2.0 sec LB: 0.0 WinNuts - \$pdata

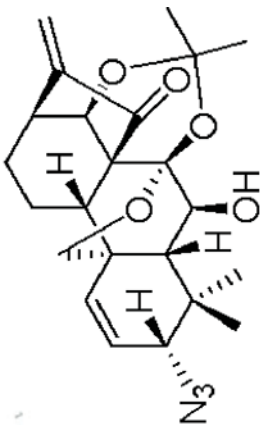

8, HMQC

hmqc\_cy 2 1 /opt/topspin3.0/data/tzhang/nmr

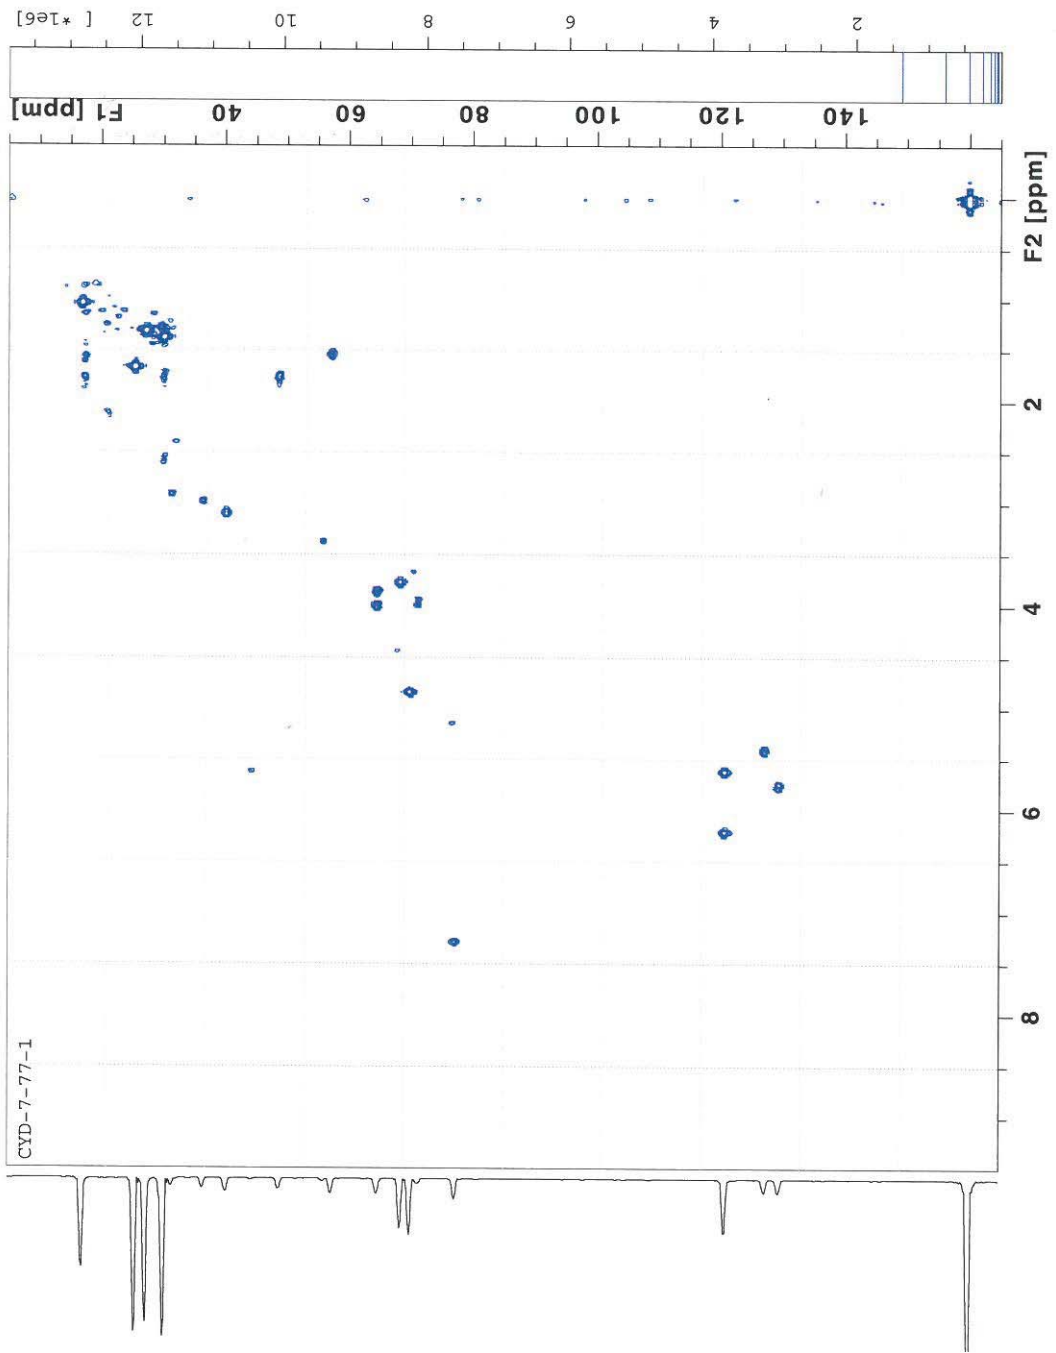

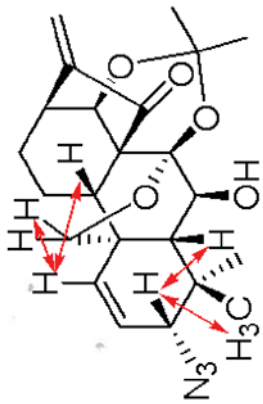

**8, NOESY**

noesy-org 22 1 /opt/topspin3.0/data/tzwang/nmr

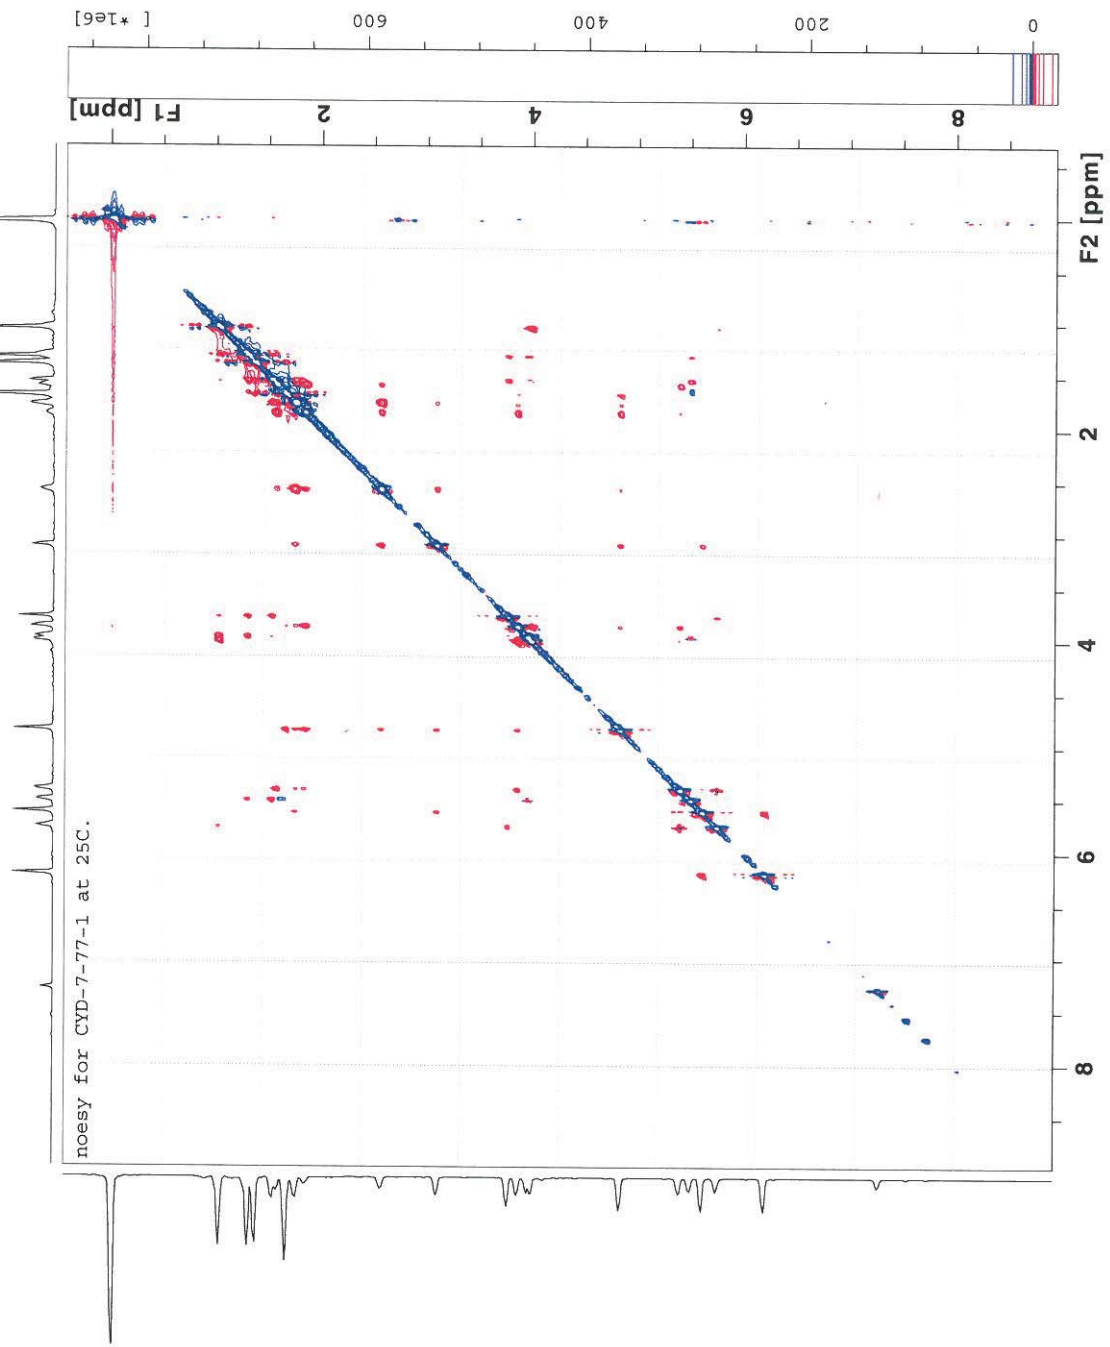

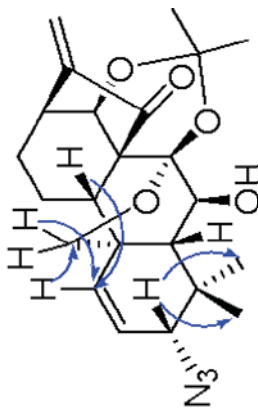

**8, HMBC**

hmbc\_cy 2 1. /opt/topspin3.0/data/tzhang/nmr

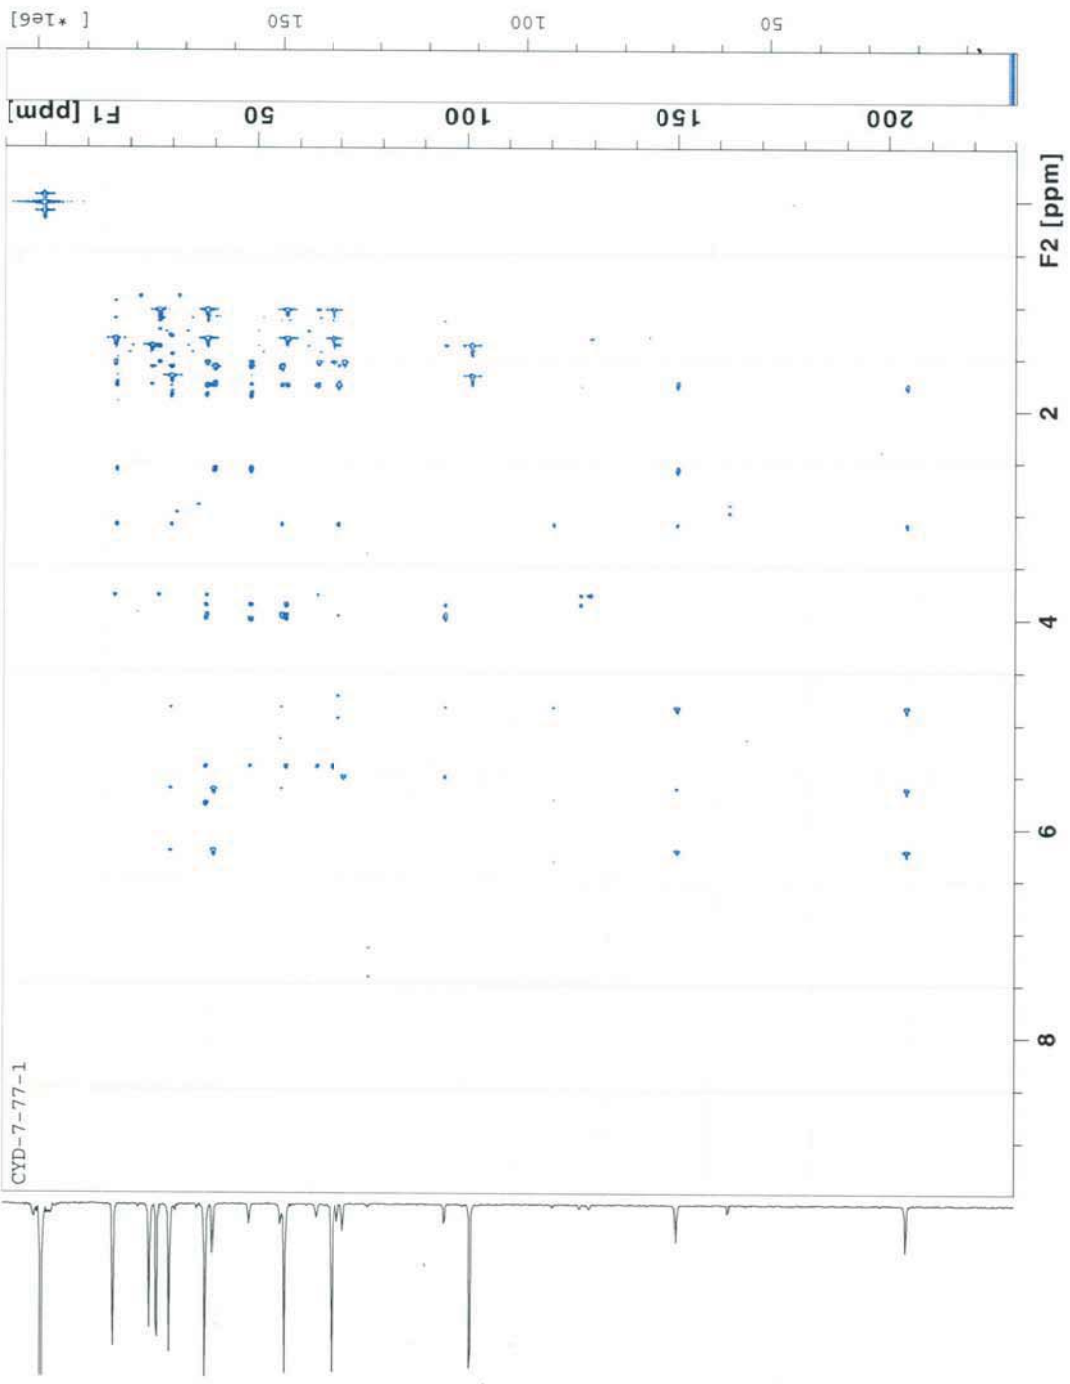

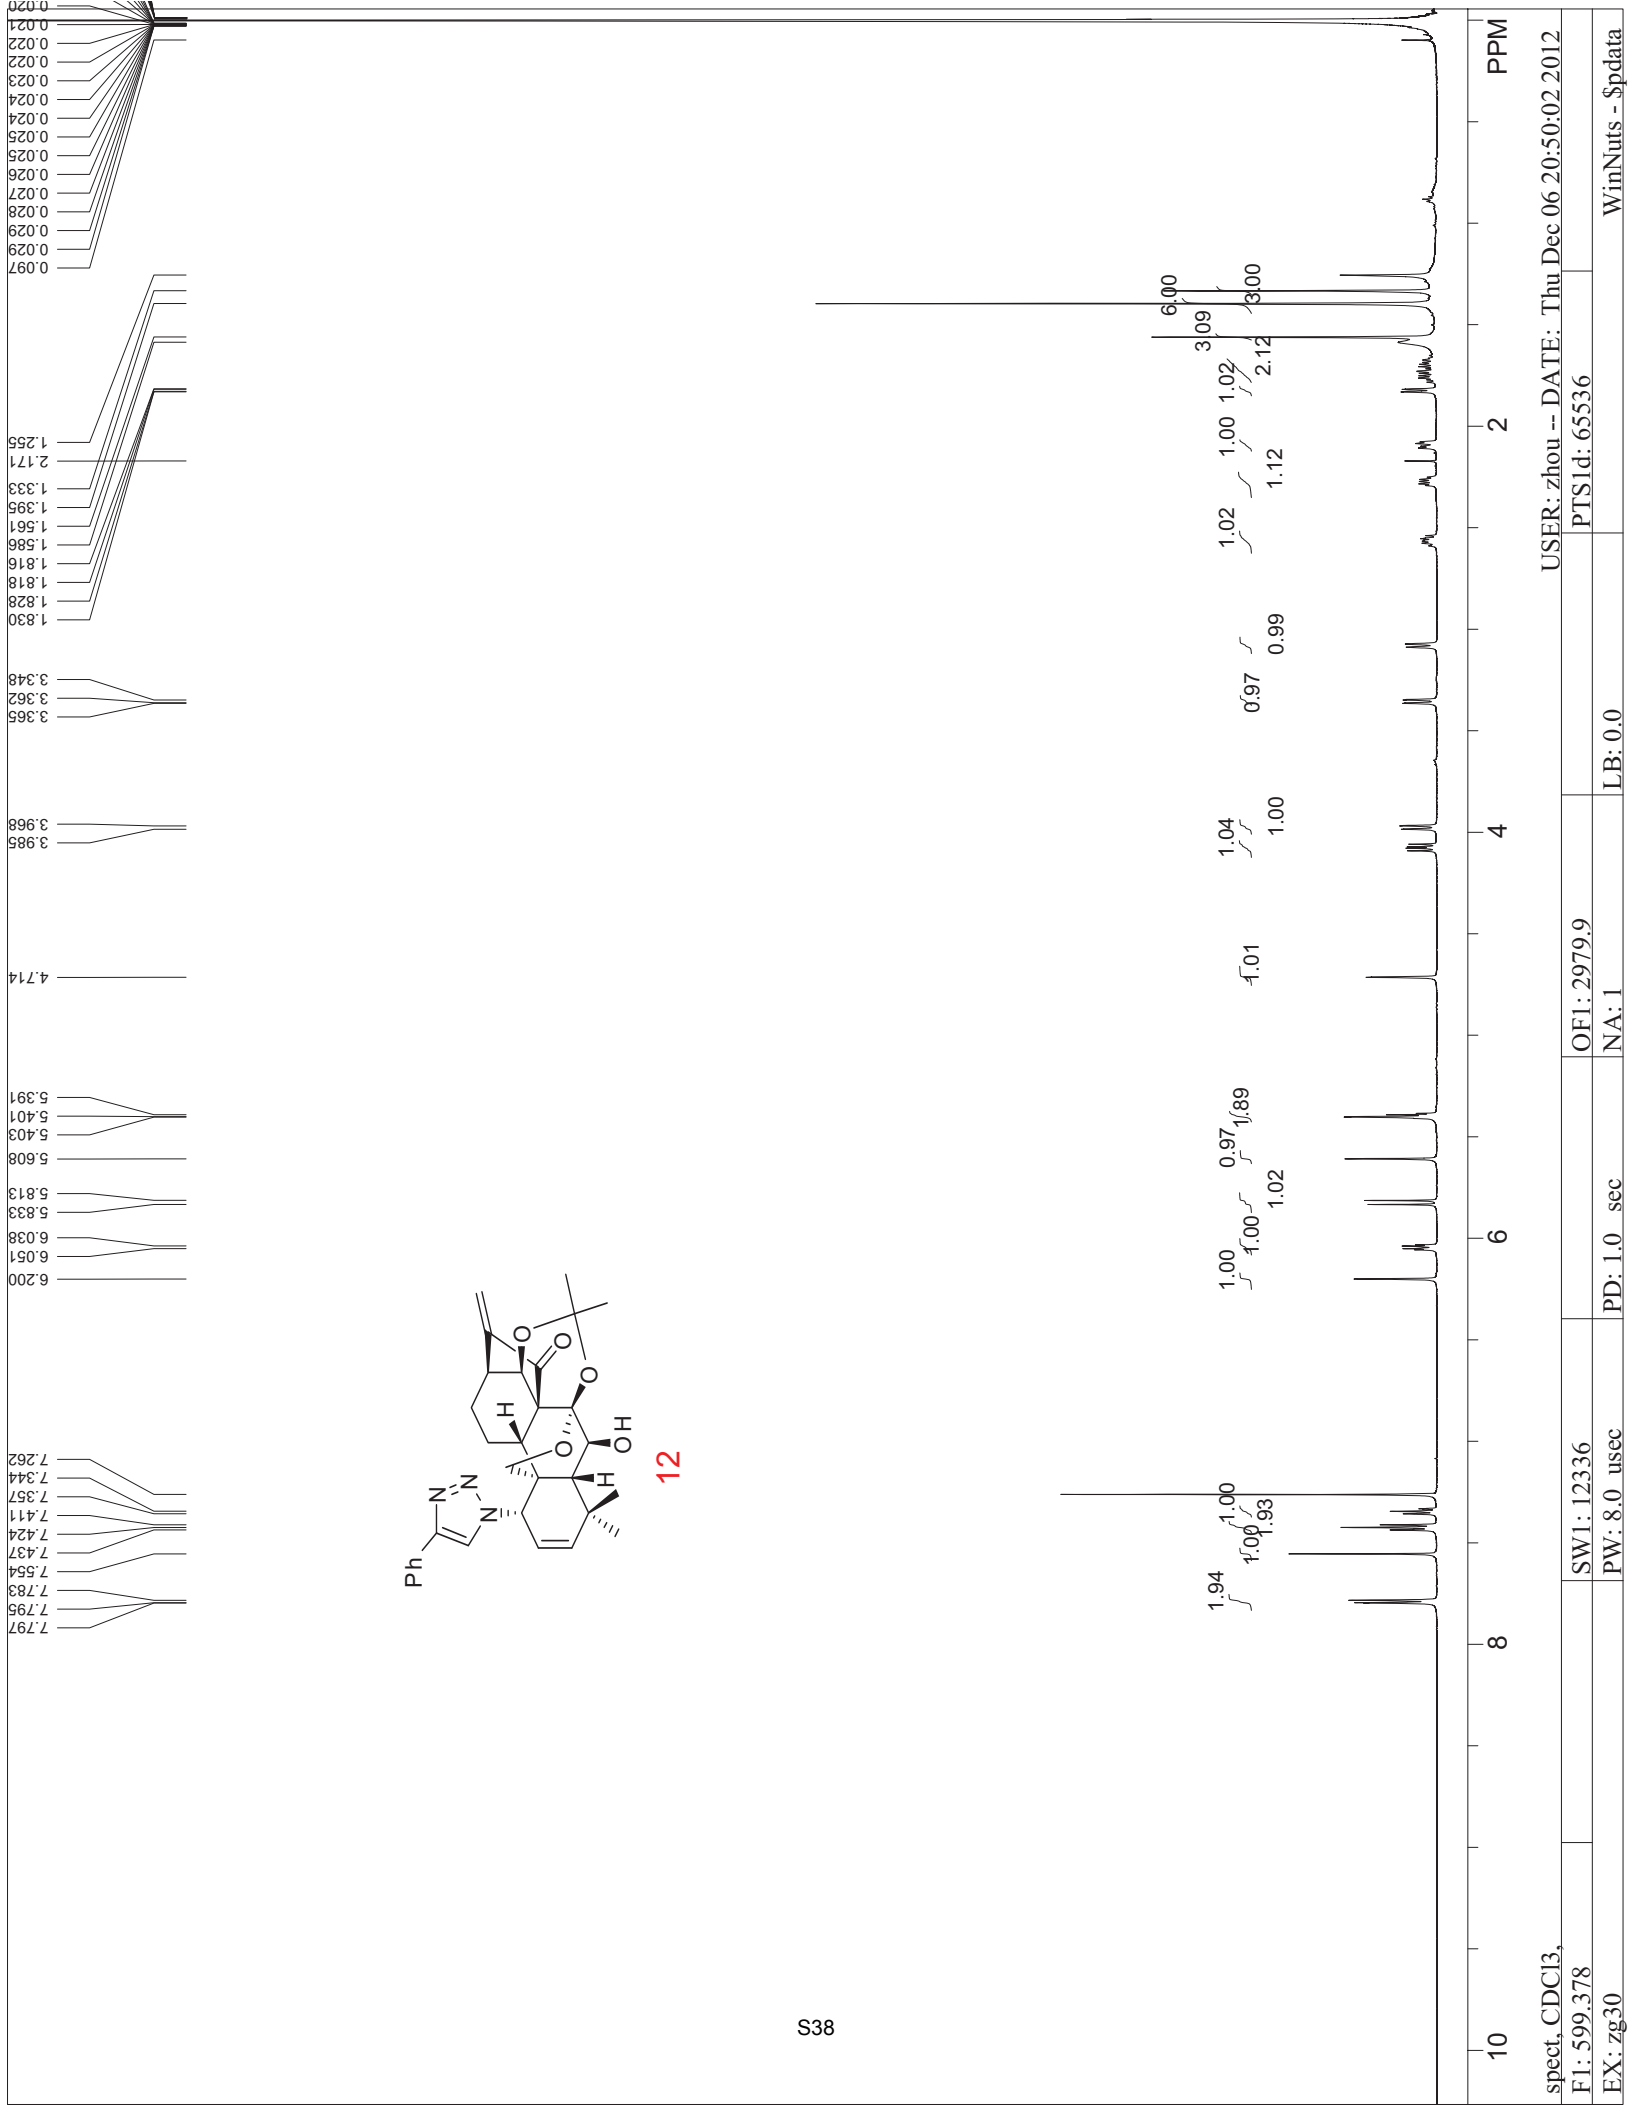

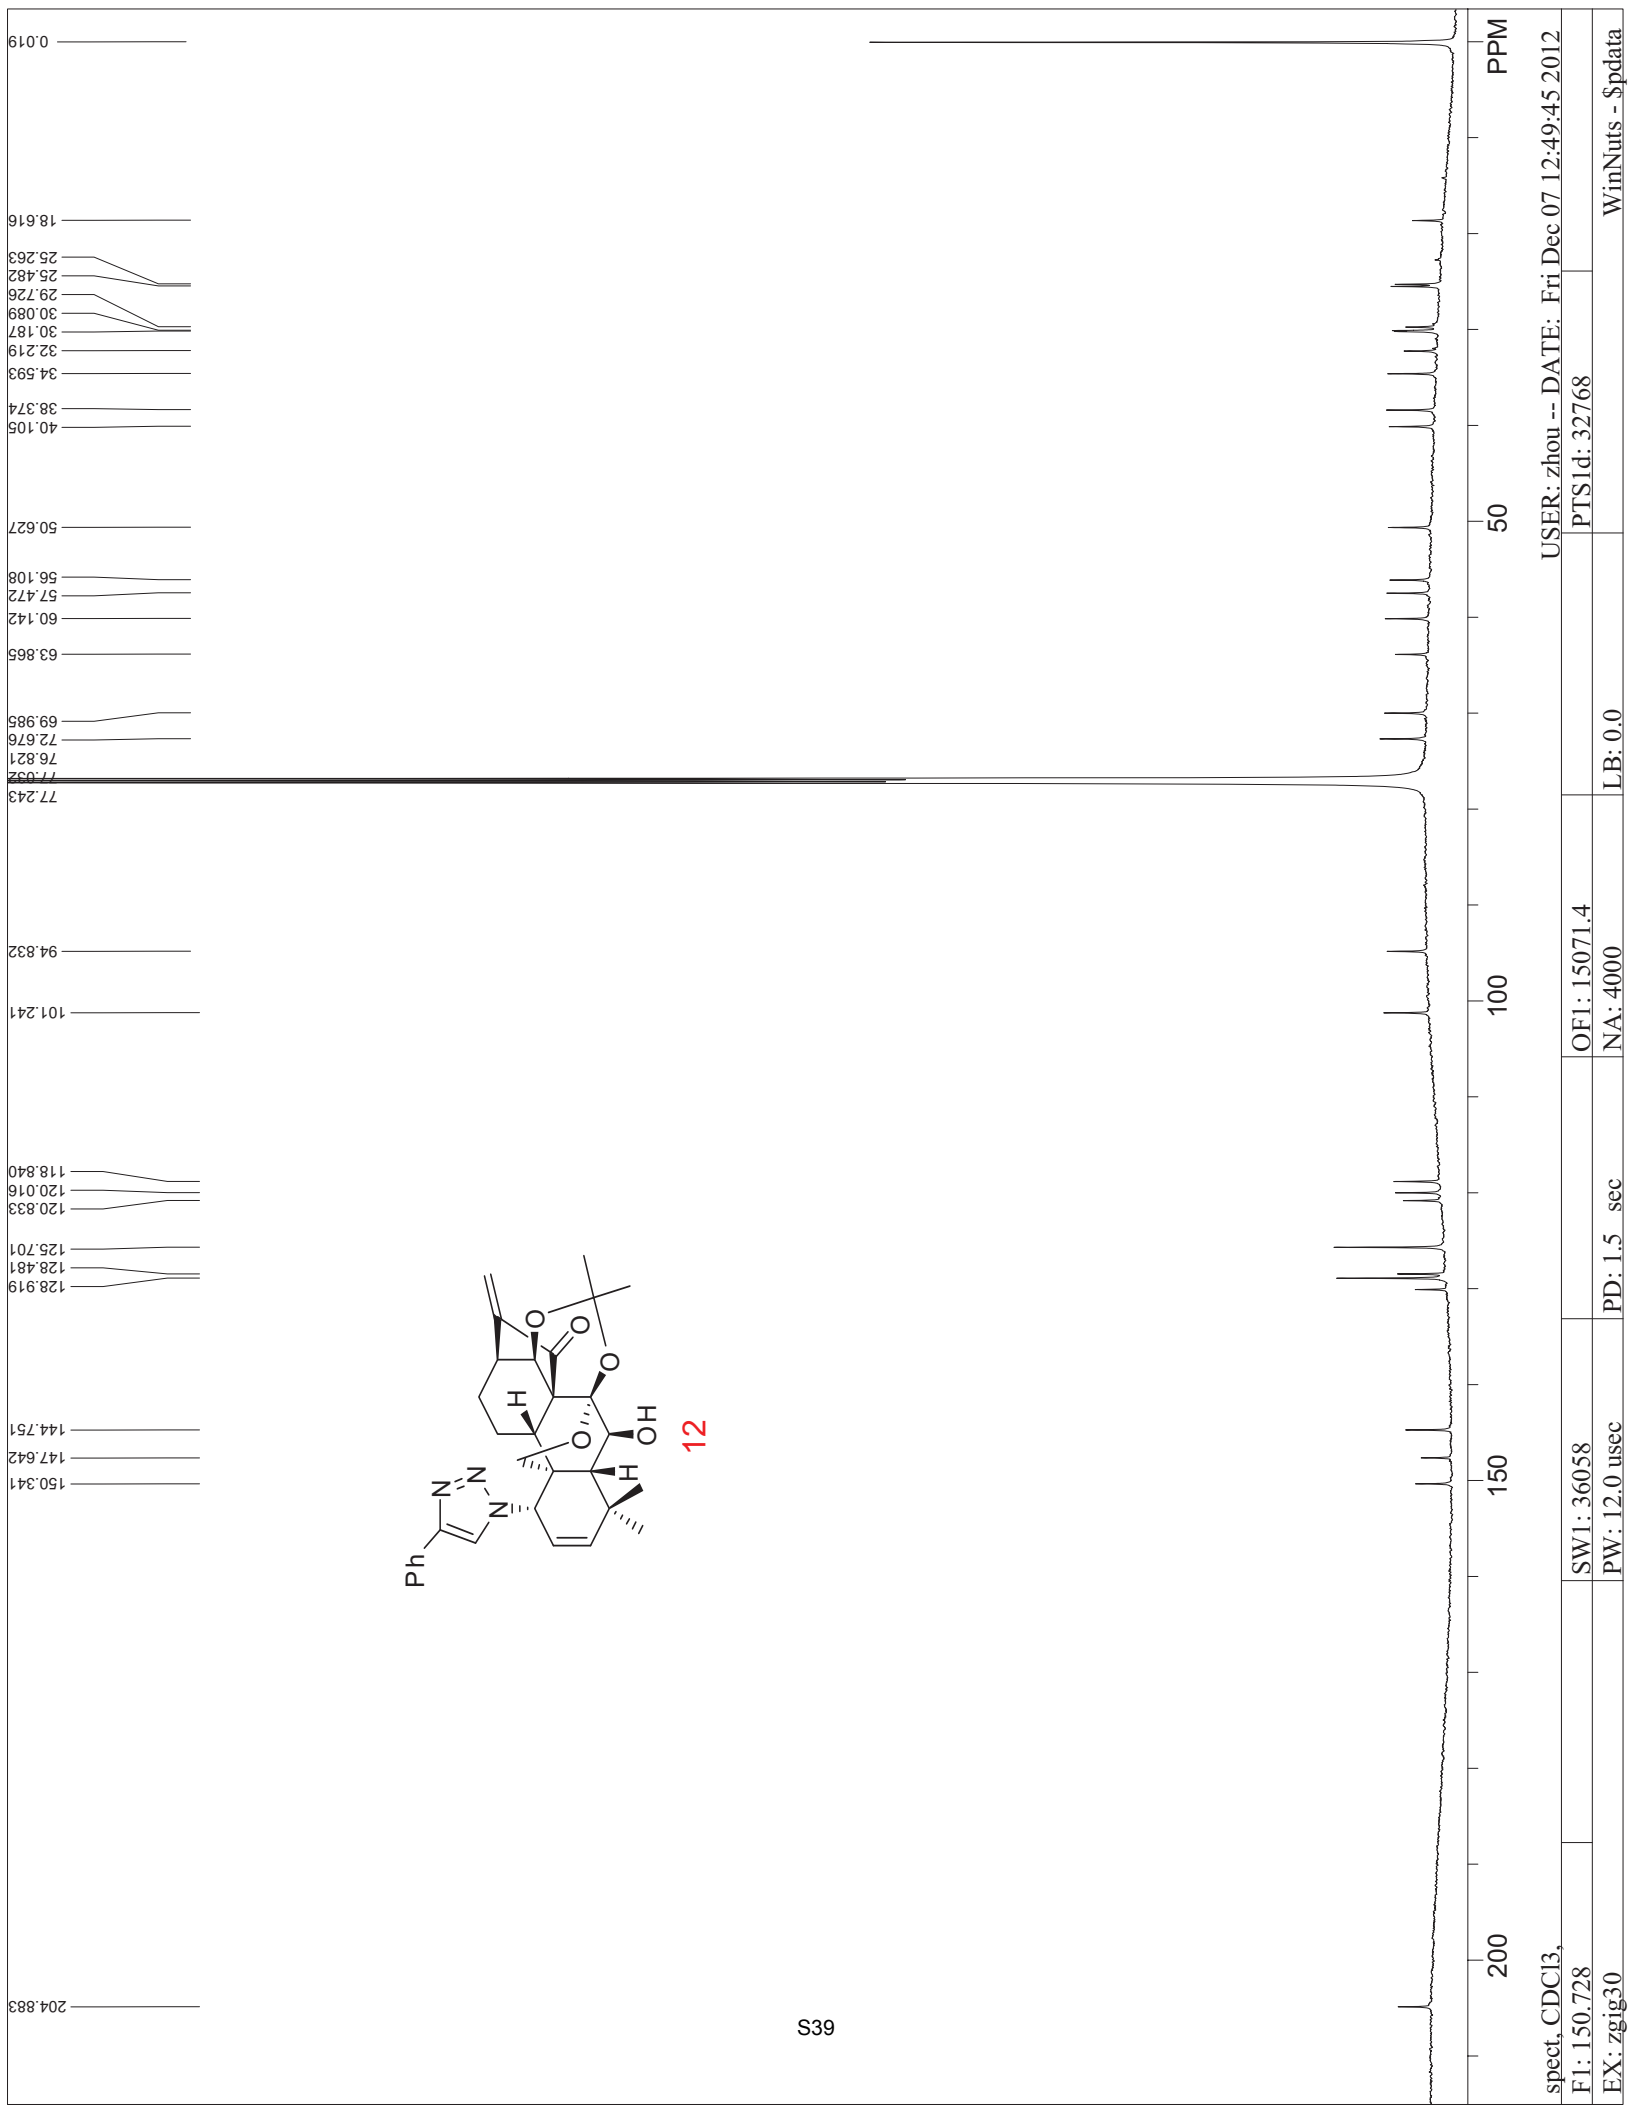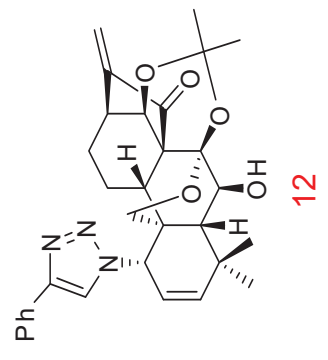

spect, CDCI3, USER: zhou -- DATE: Fri Dec 07 12:49:45 2012  
 F1: 150.728 OF1: 15071.4 PTS1d: 32768  
 EX: zgig30 LB: 0.0 PD: 1.5 sec NA: 4000  
 WinNuts - \$pdata

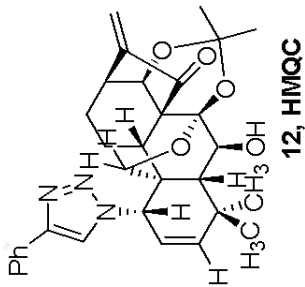

hmqc 4 1 /opt/topspin3.0/data/zhou/nmr

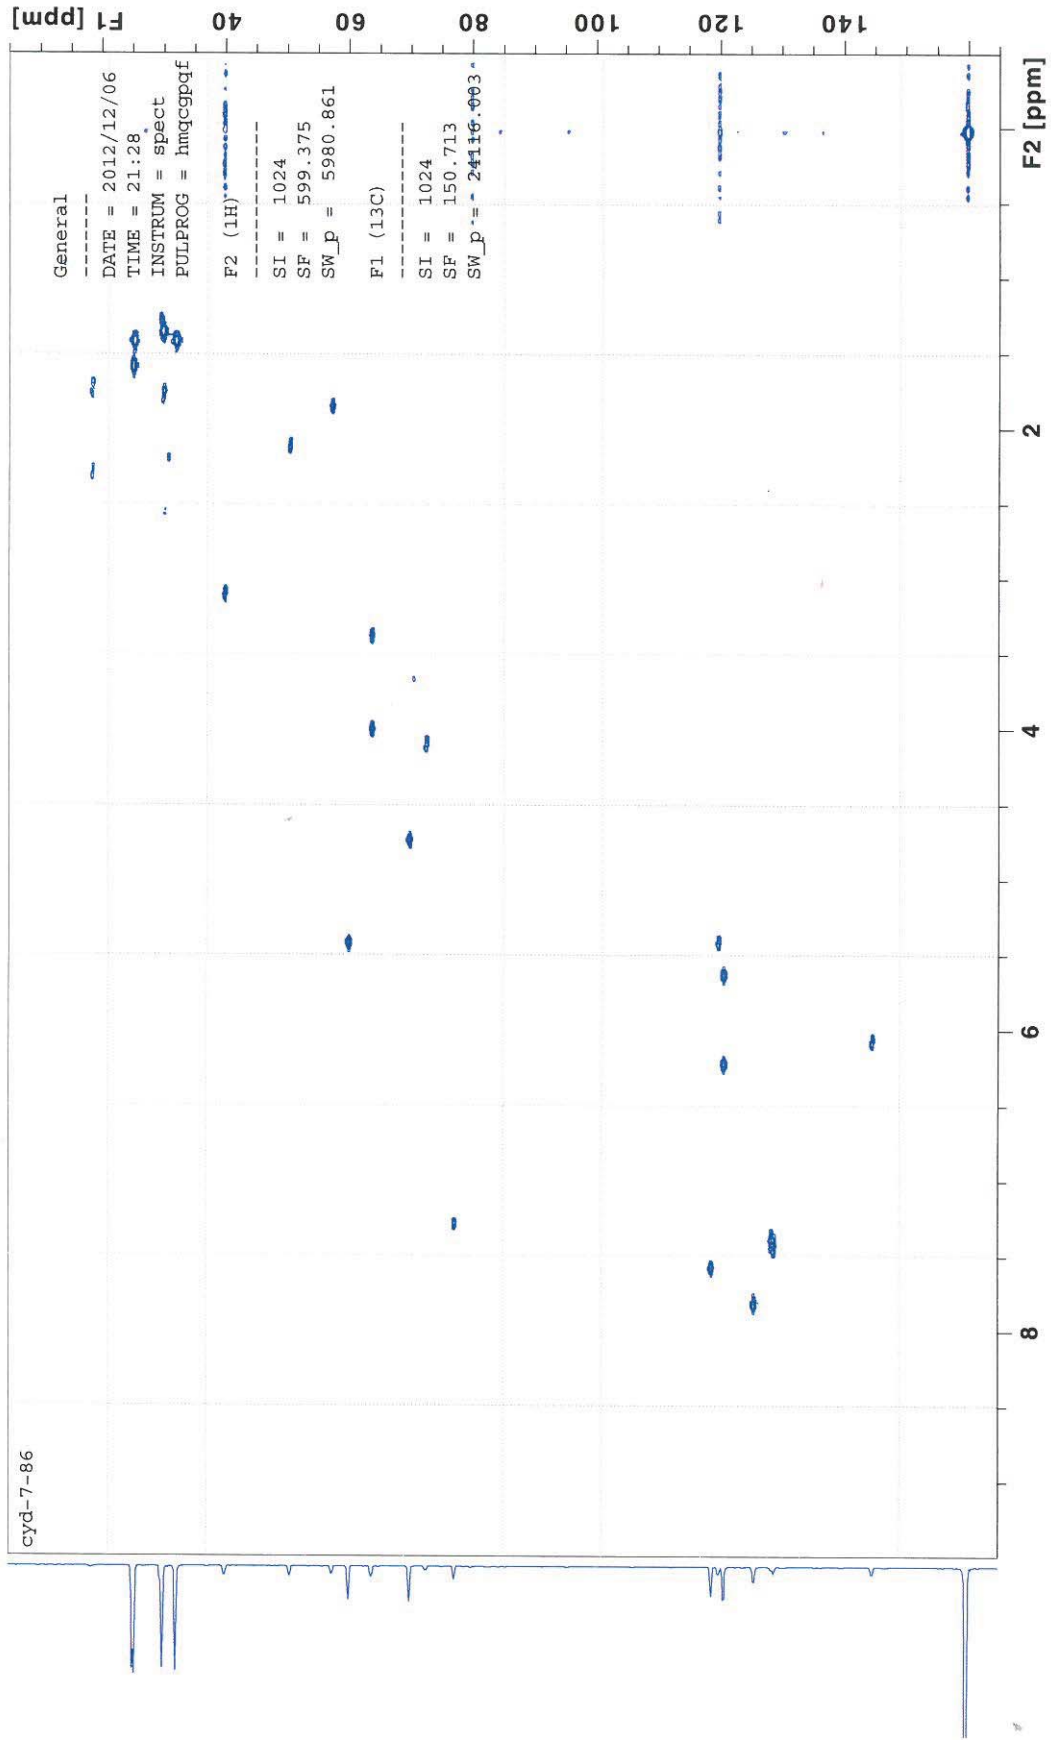



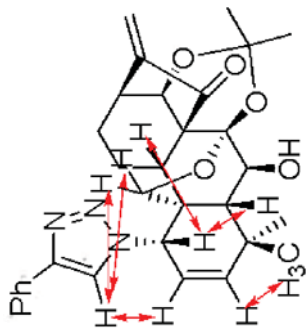

noesy 1 1 /opt/topspin3.0/data/zhou/mmr

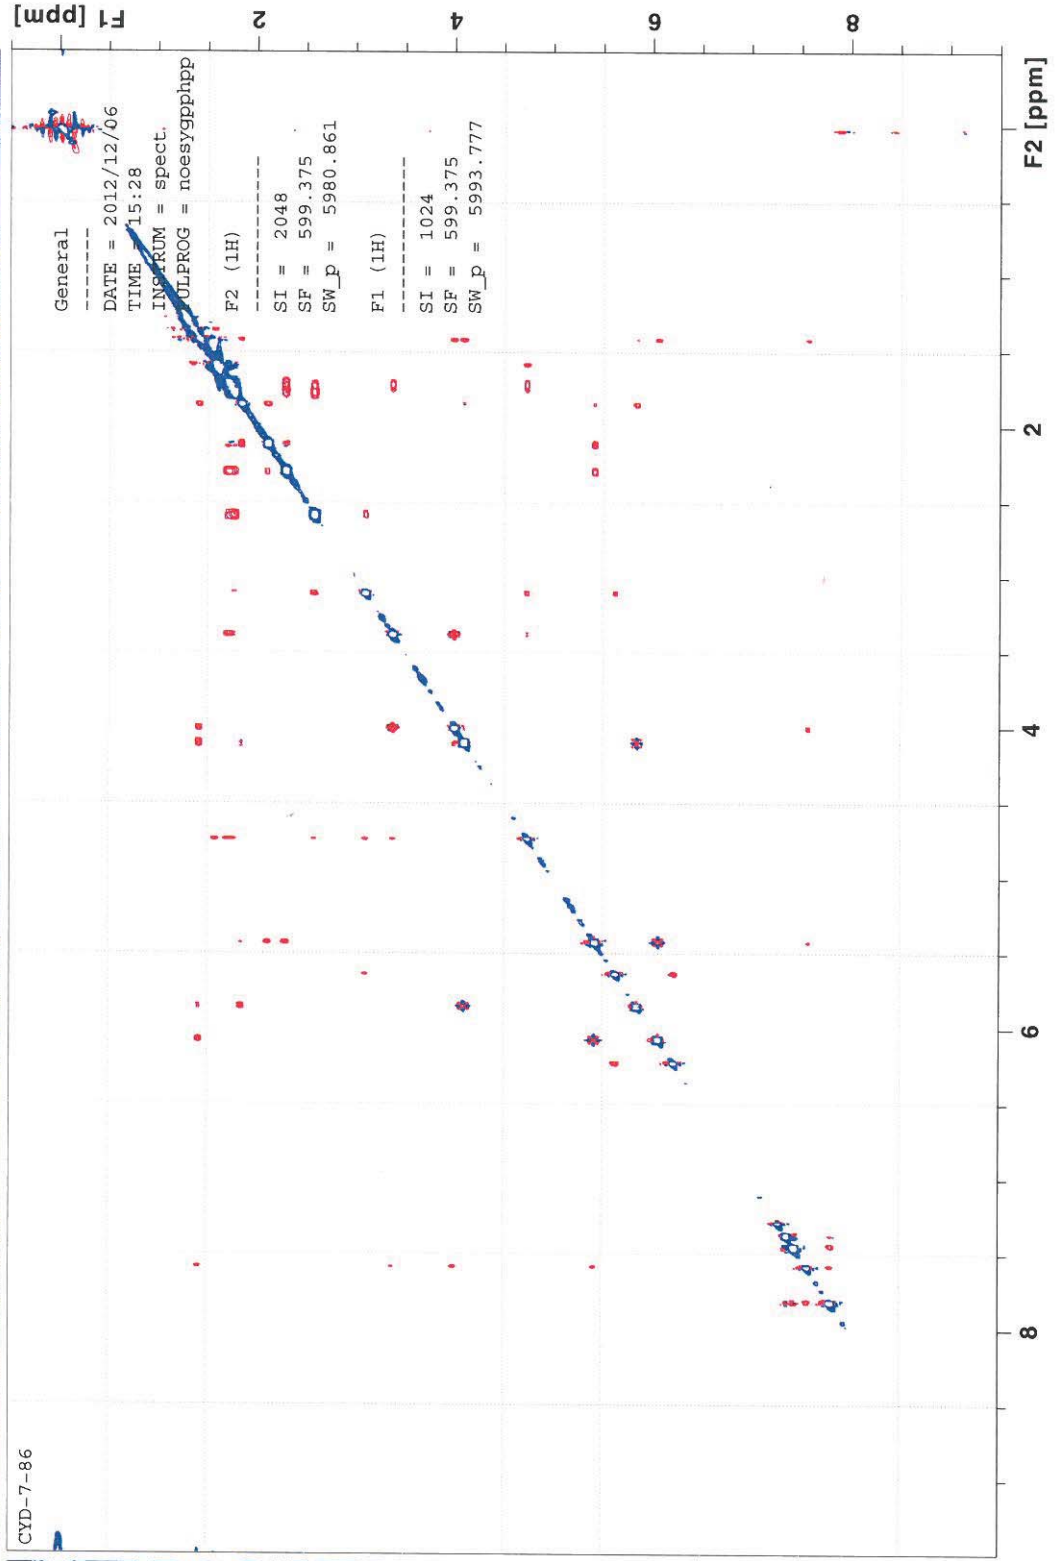

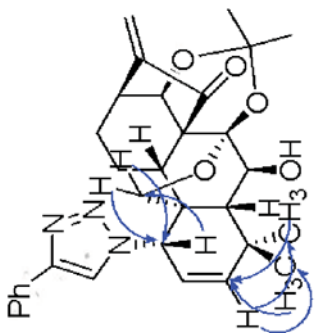

hmbc 4 1 /opt/topspin3.0/data/zhou/nmr

12, HMBC

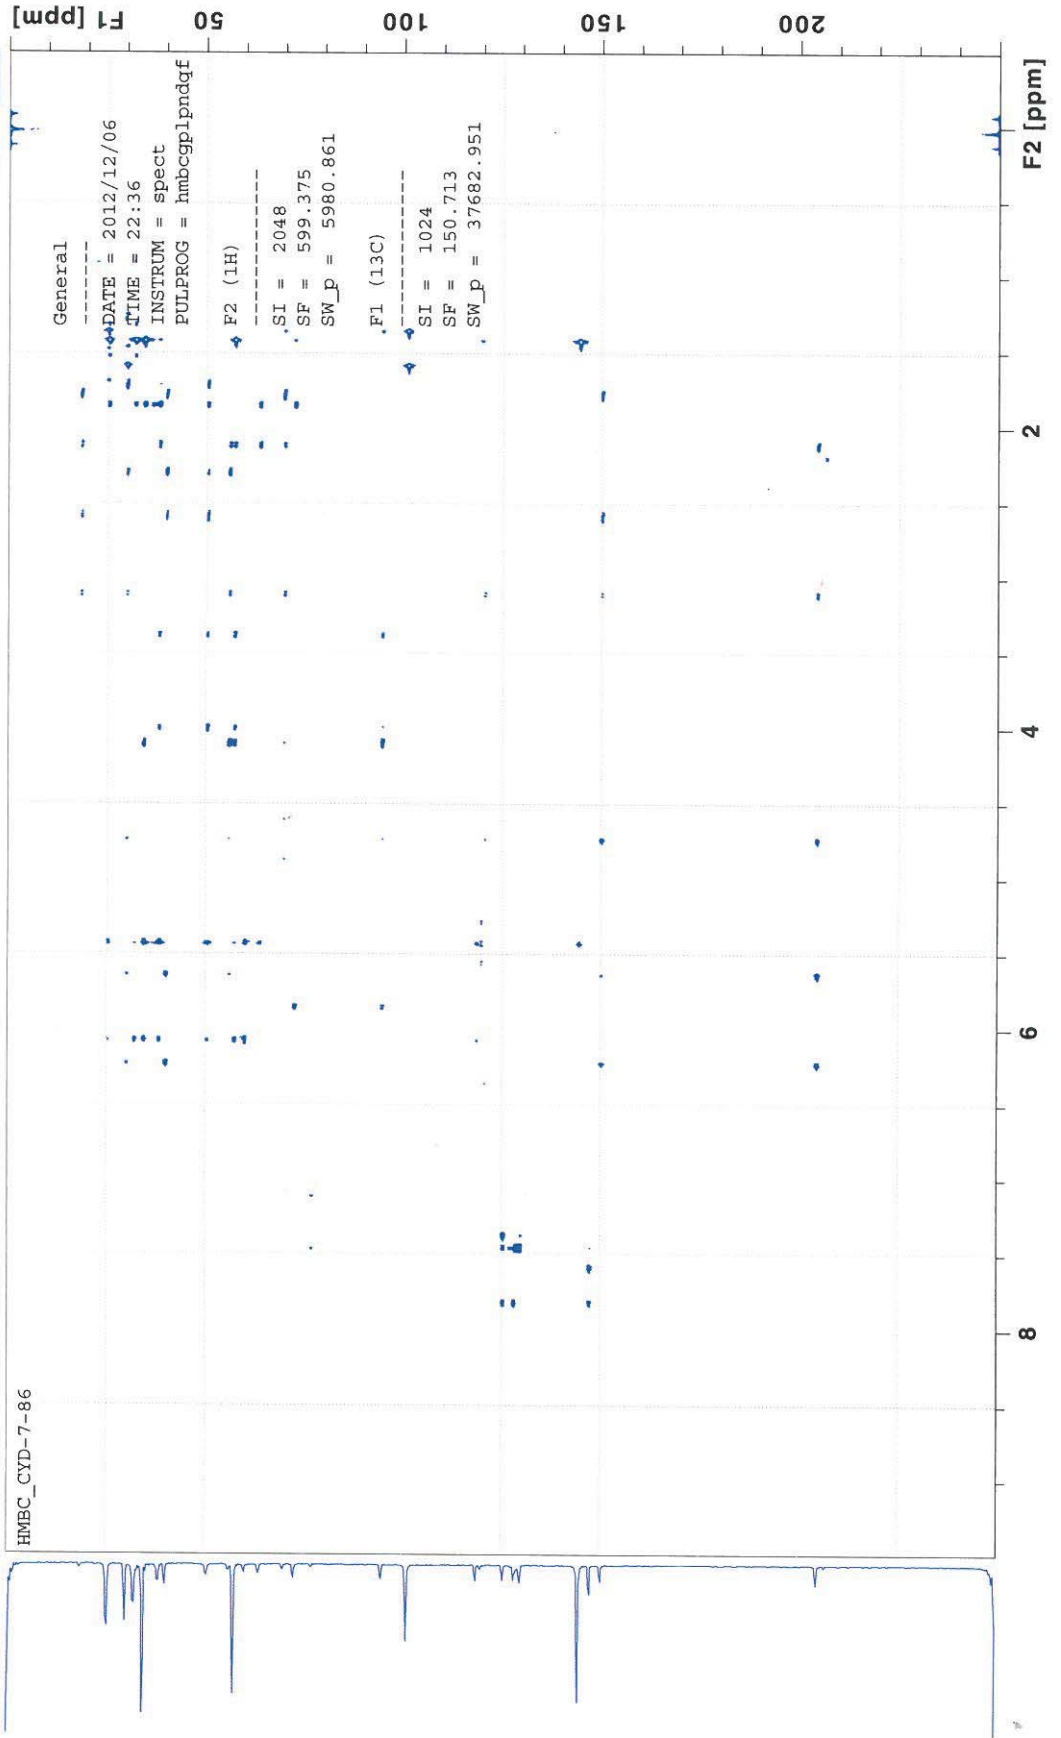

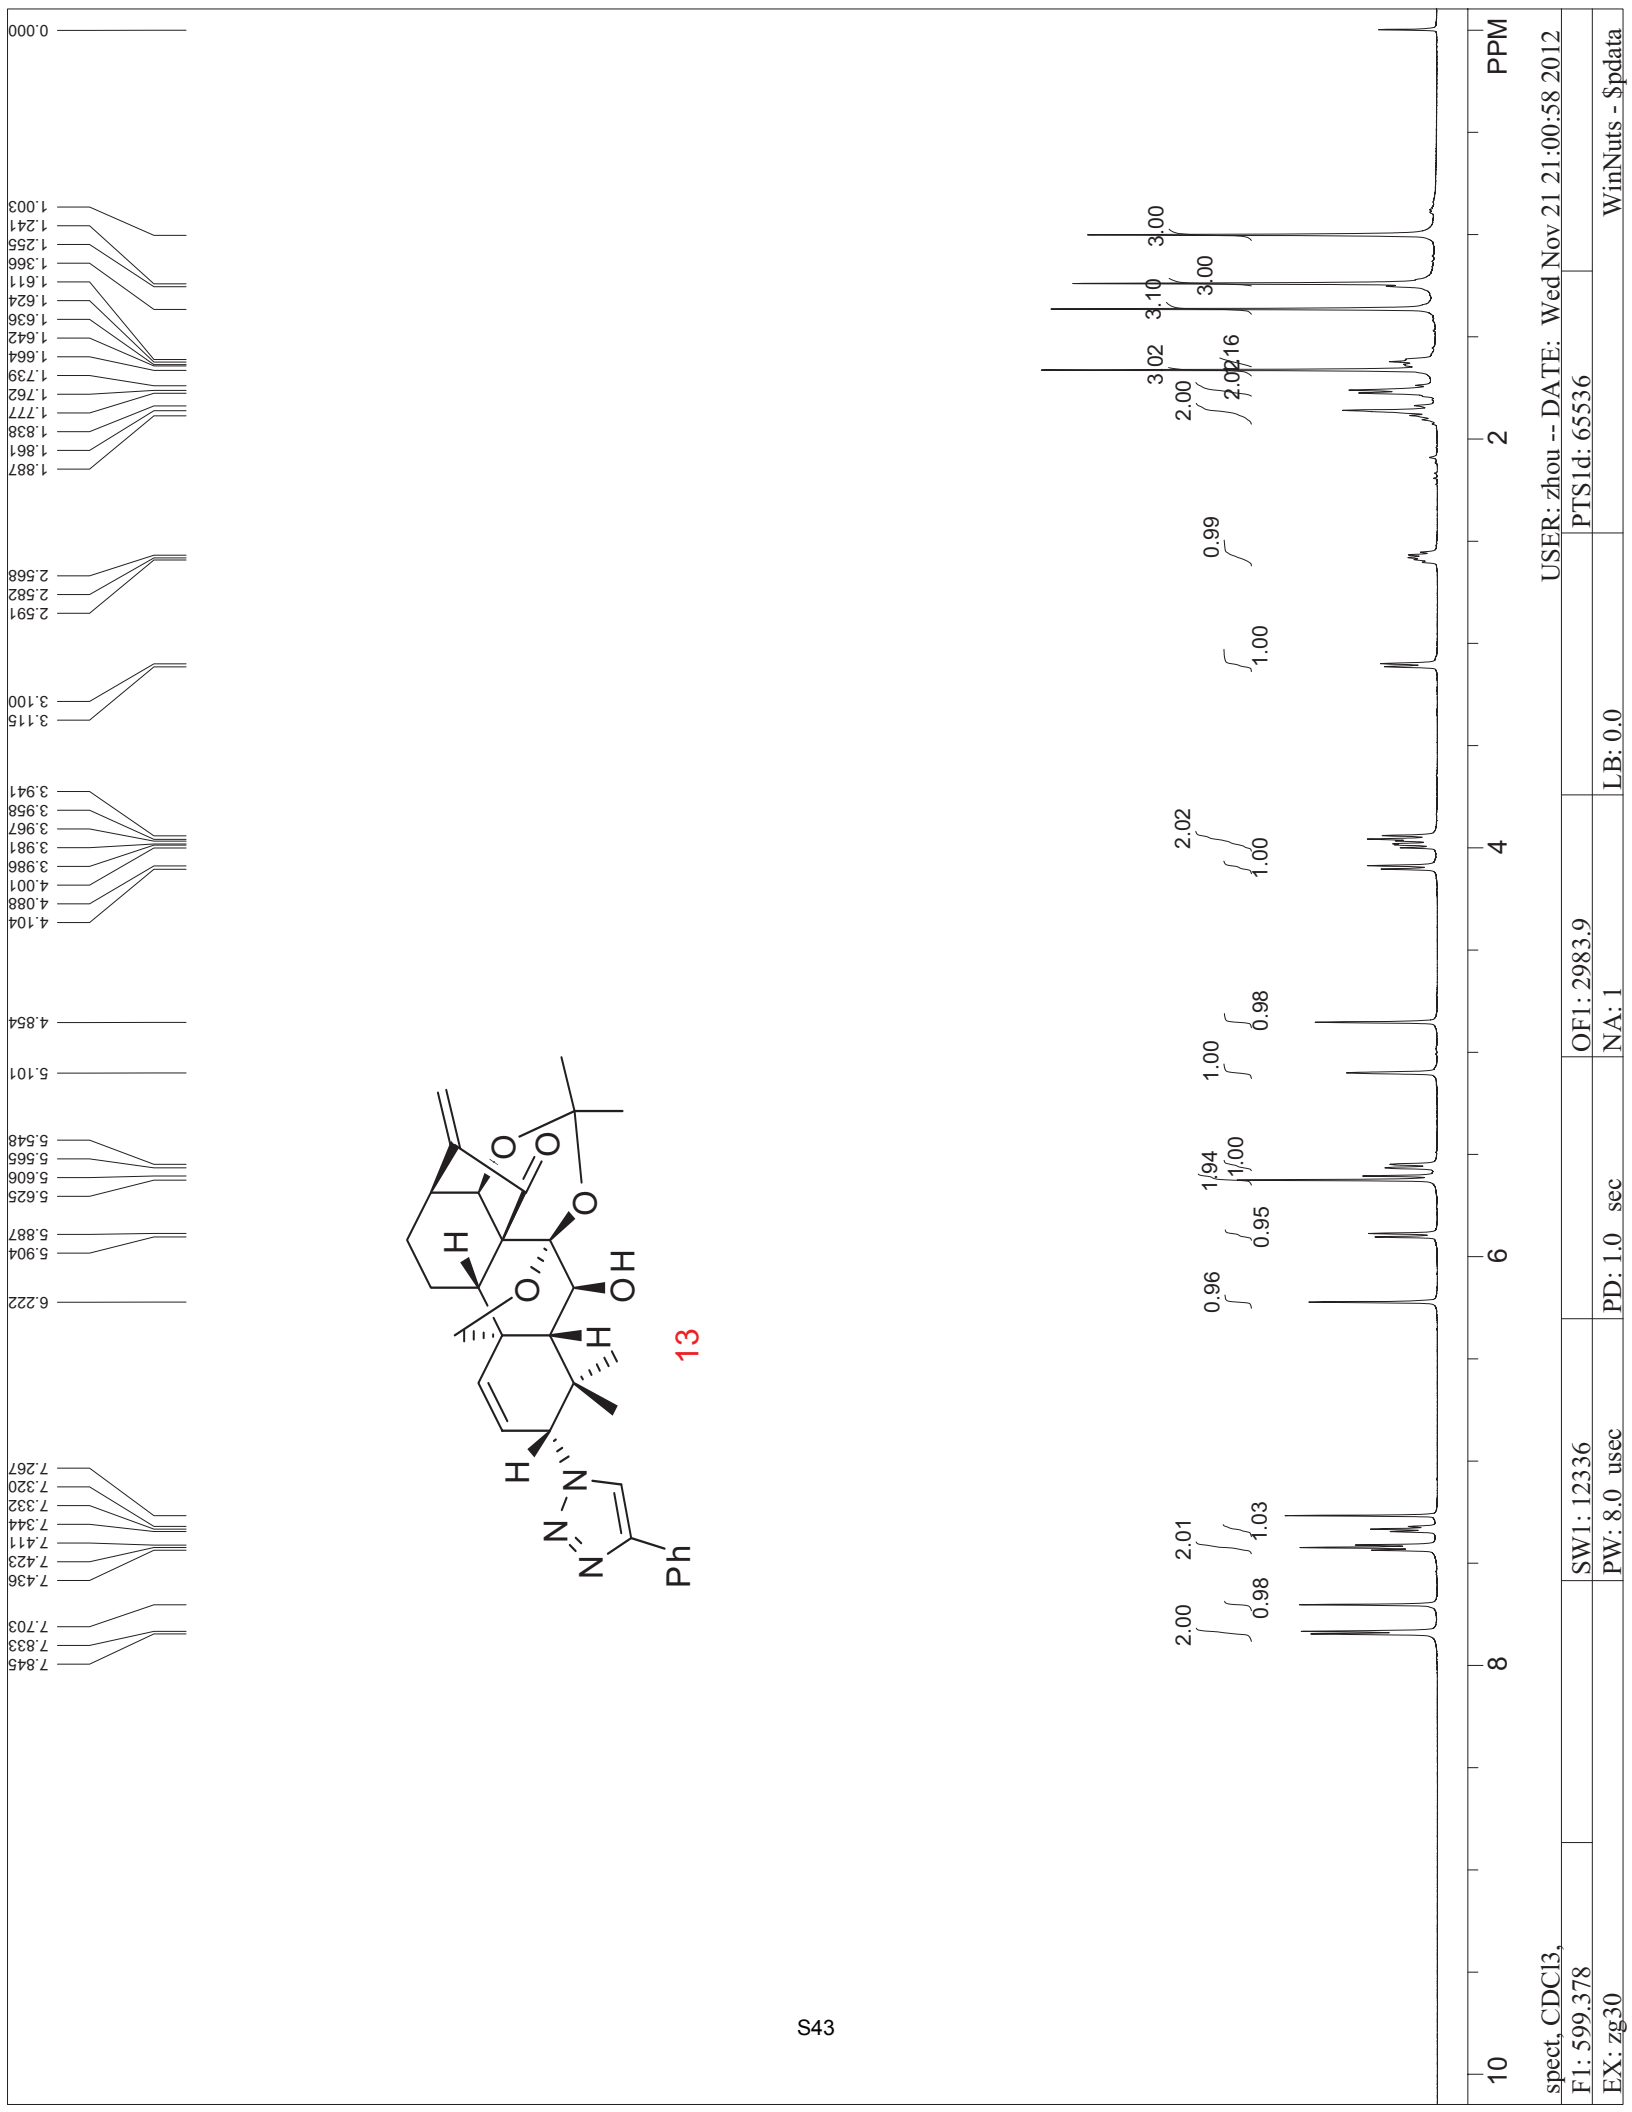

spect, CDC13, USER: zhou -- DATE: Wed Nov 21 21:00:58 2012  
 F1: 599.378 OF1: 2983.9 PTS1d: 65536  
 EX: zg30 PD: 1.0 sec LB: 0.0 WinNuts - \$pdata

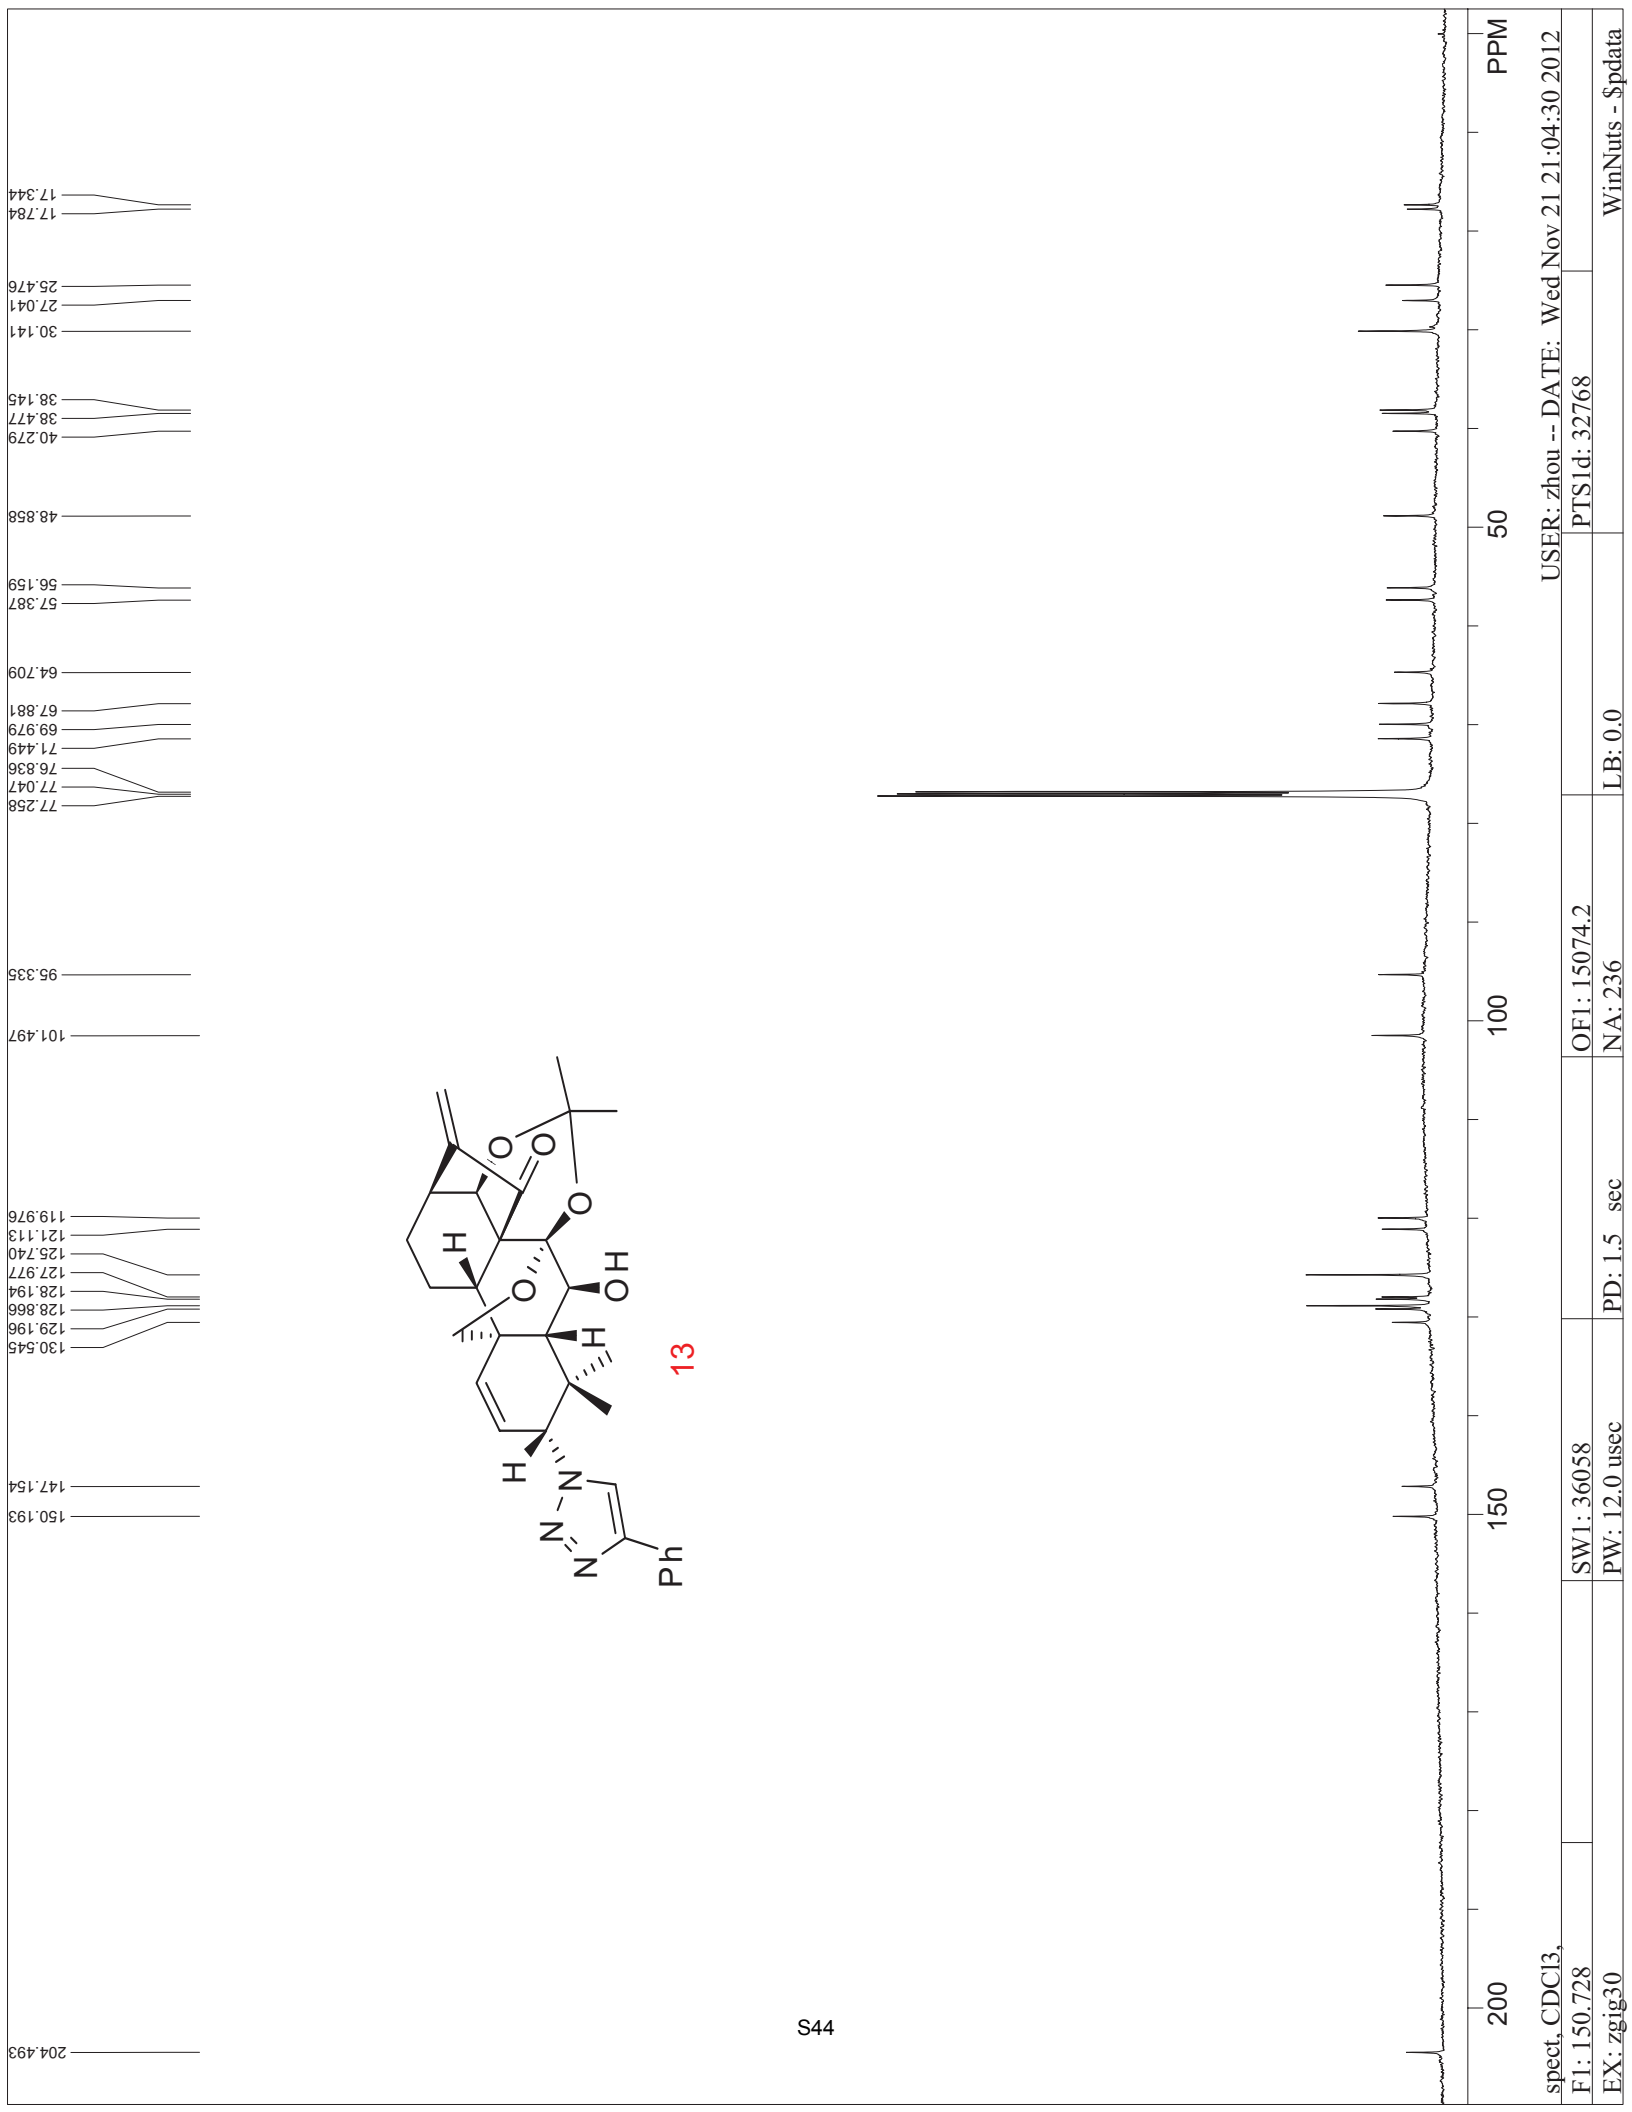

spect, CDCl3, USER: zhou -- DATE: Wed Nov 21 21:04:30 2012  
 F1: 150.728 OF1: 15074.2 PTS1d: 32768  
 EX: zgig30 PW: 12.0 usec PD: 1.5 sec LB: 0.0 WinNuts - \$pdata

600 MHz

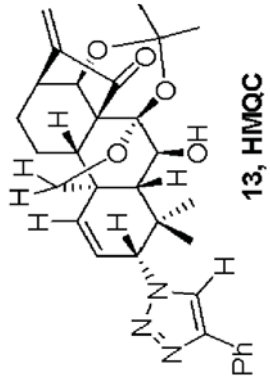

hmqc 3 1 /opt/topspin3.0/data/zhou/nmr

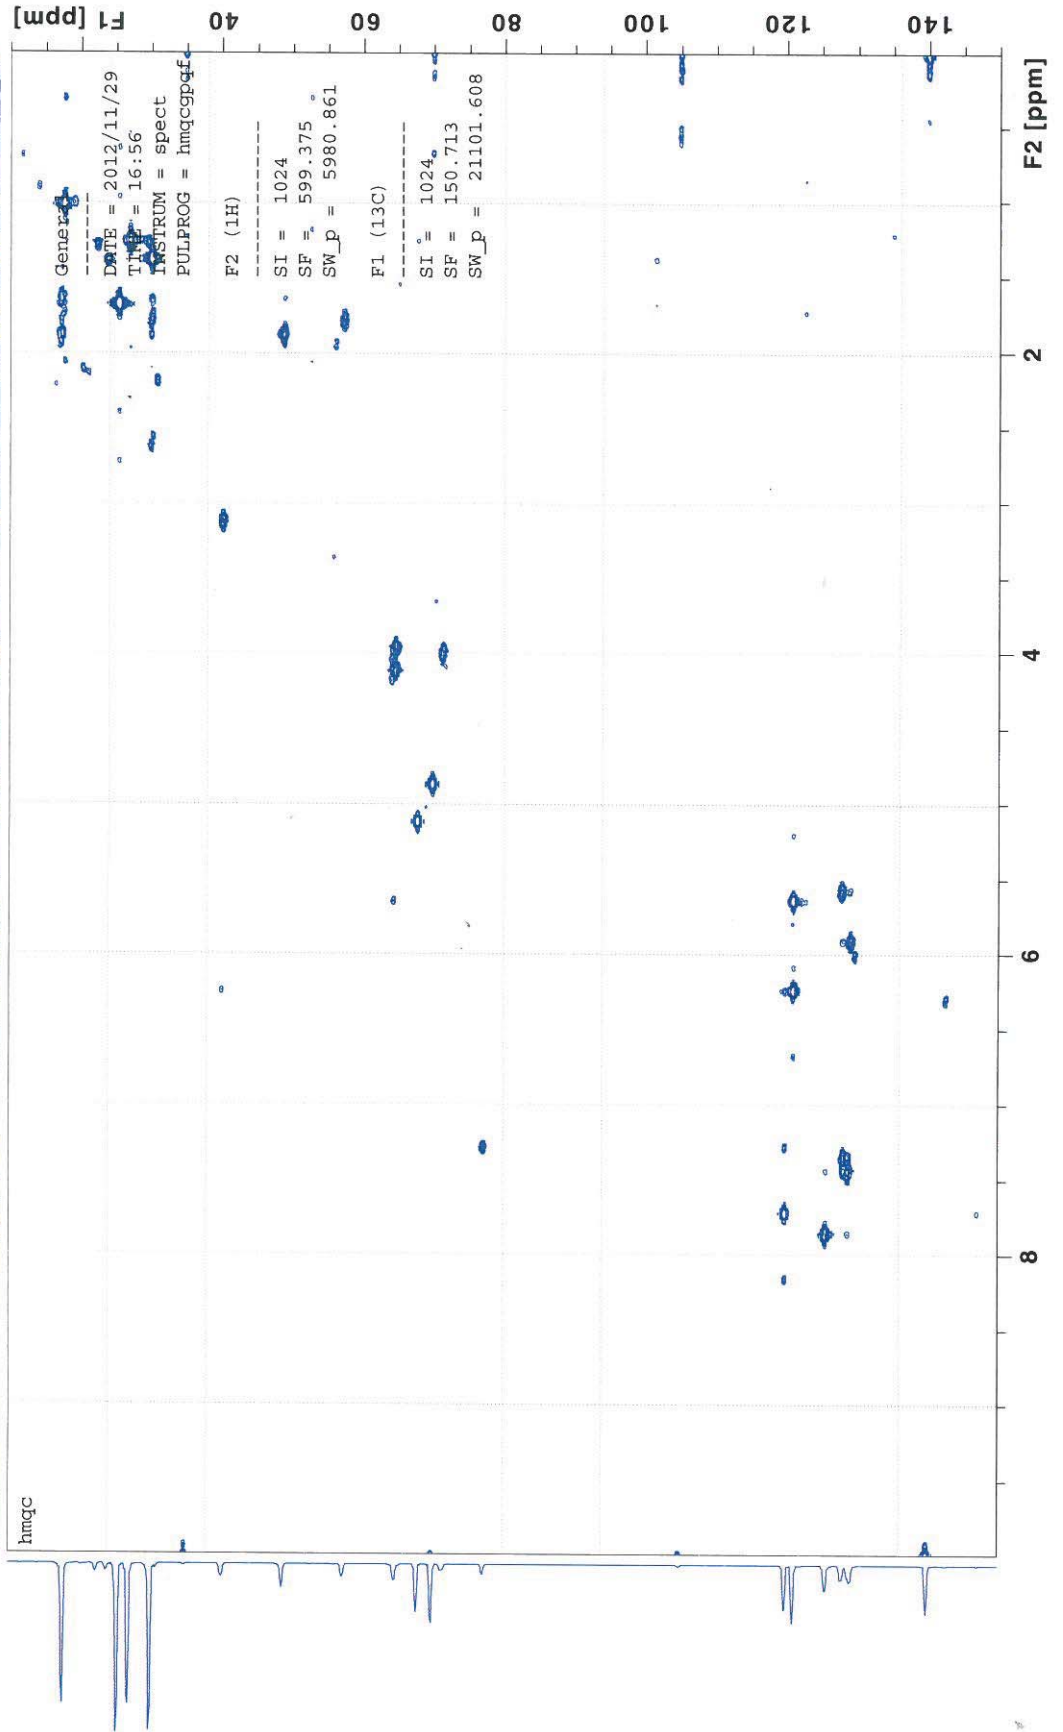

c10-7-78 700M HZ

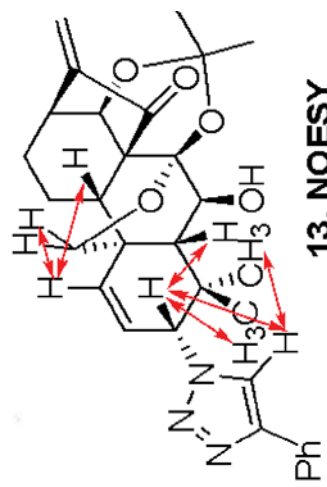

noesy-org 21 1 /opt/topspin3.0/data/tzwang/nmr

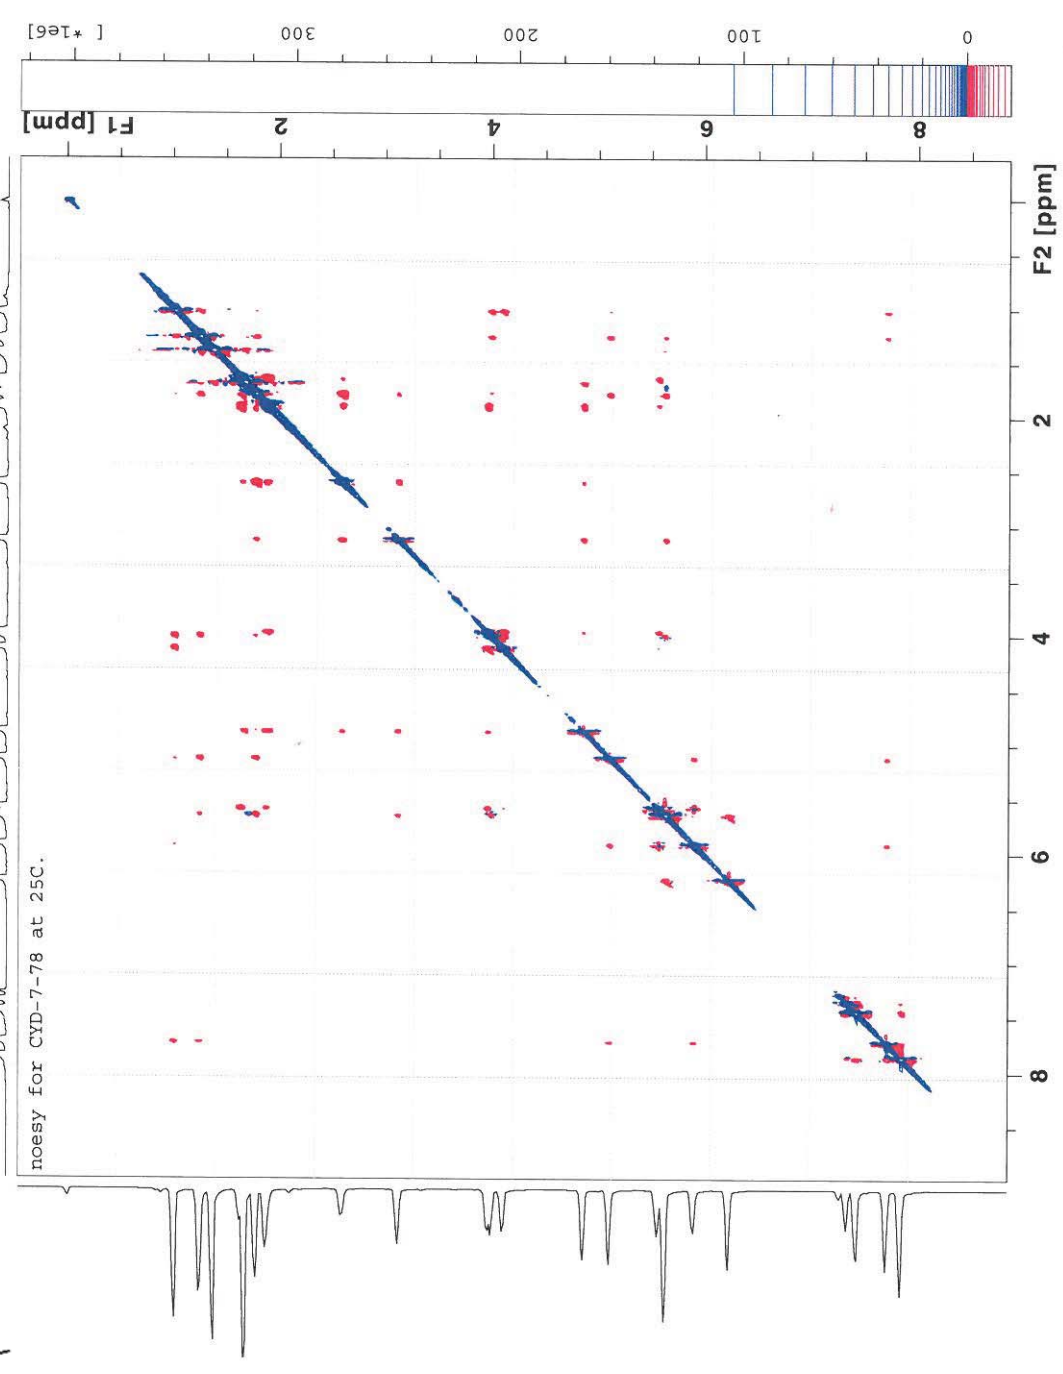

600MHz

hmbc 3 1 /opt/topspin3.0/data/zhou/nmr

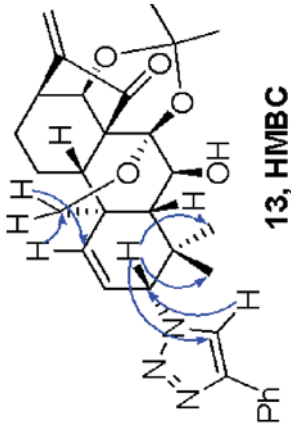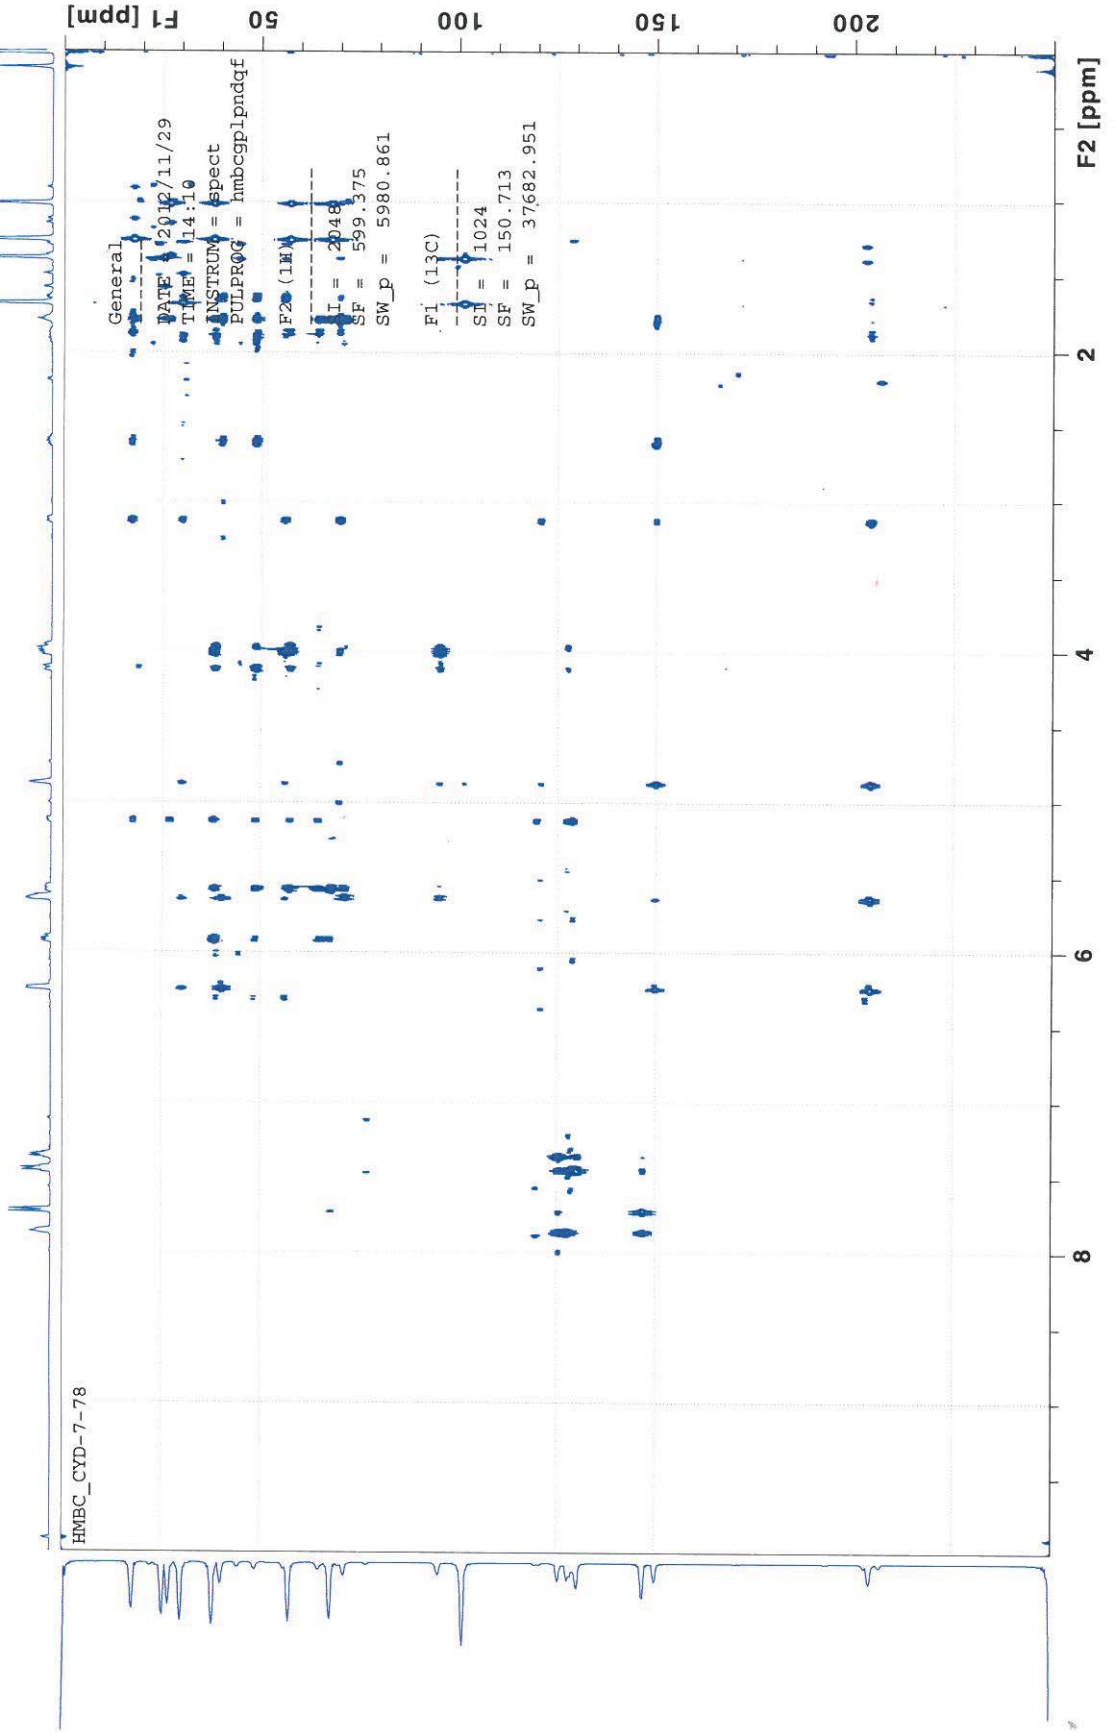

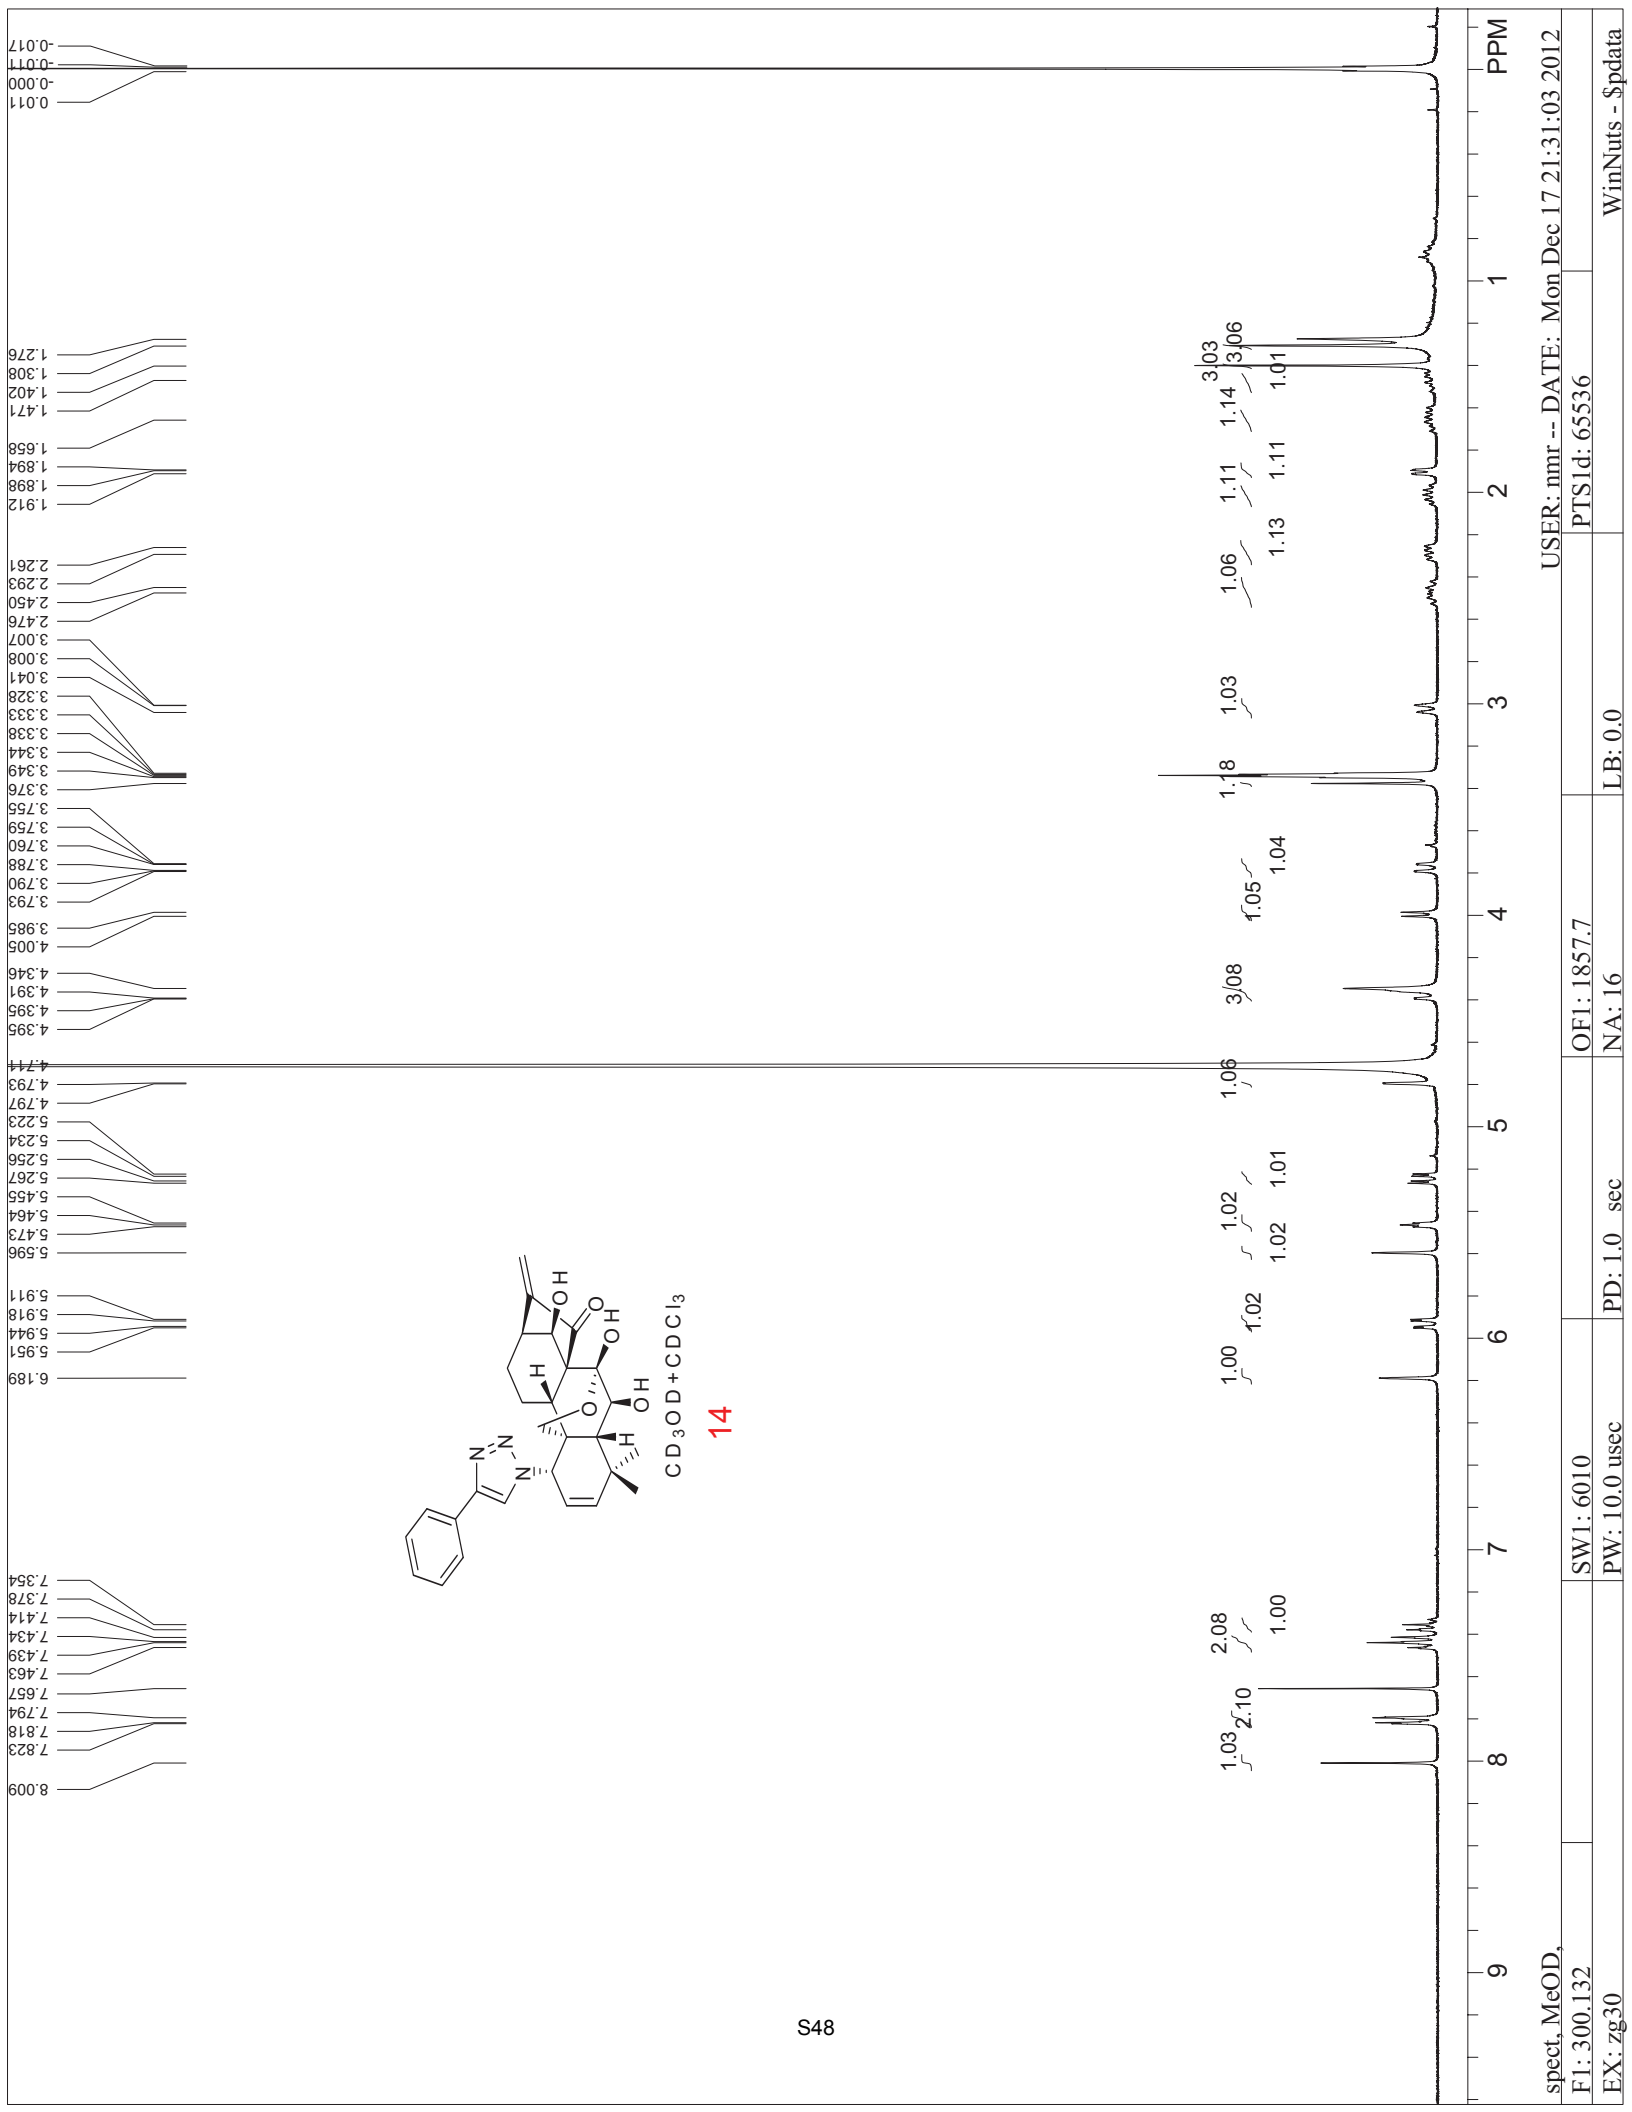

spect, MeOD, USER: nmr -- DATE: Mon Dec 17 21:31:03 2012  
 F1: 300.132 OF1: 1857.7 PTS1d: 65536  
 EX: zg30 NA: 16 LB: 0.0 WinNuts - \$pdata



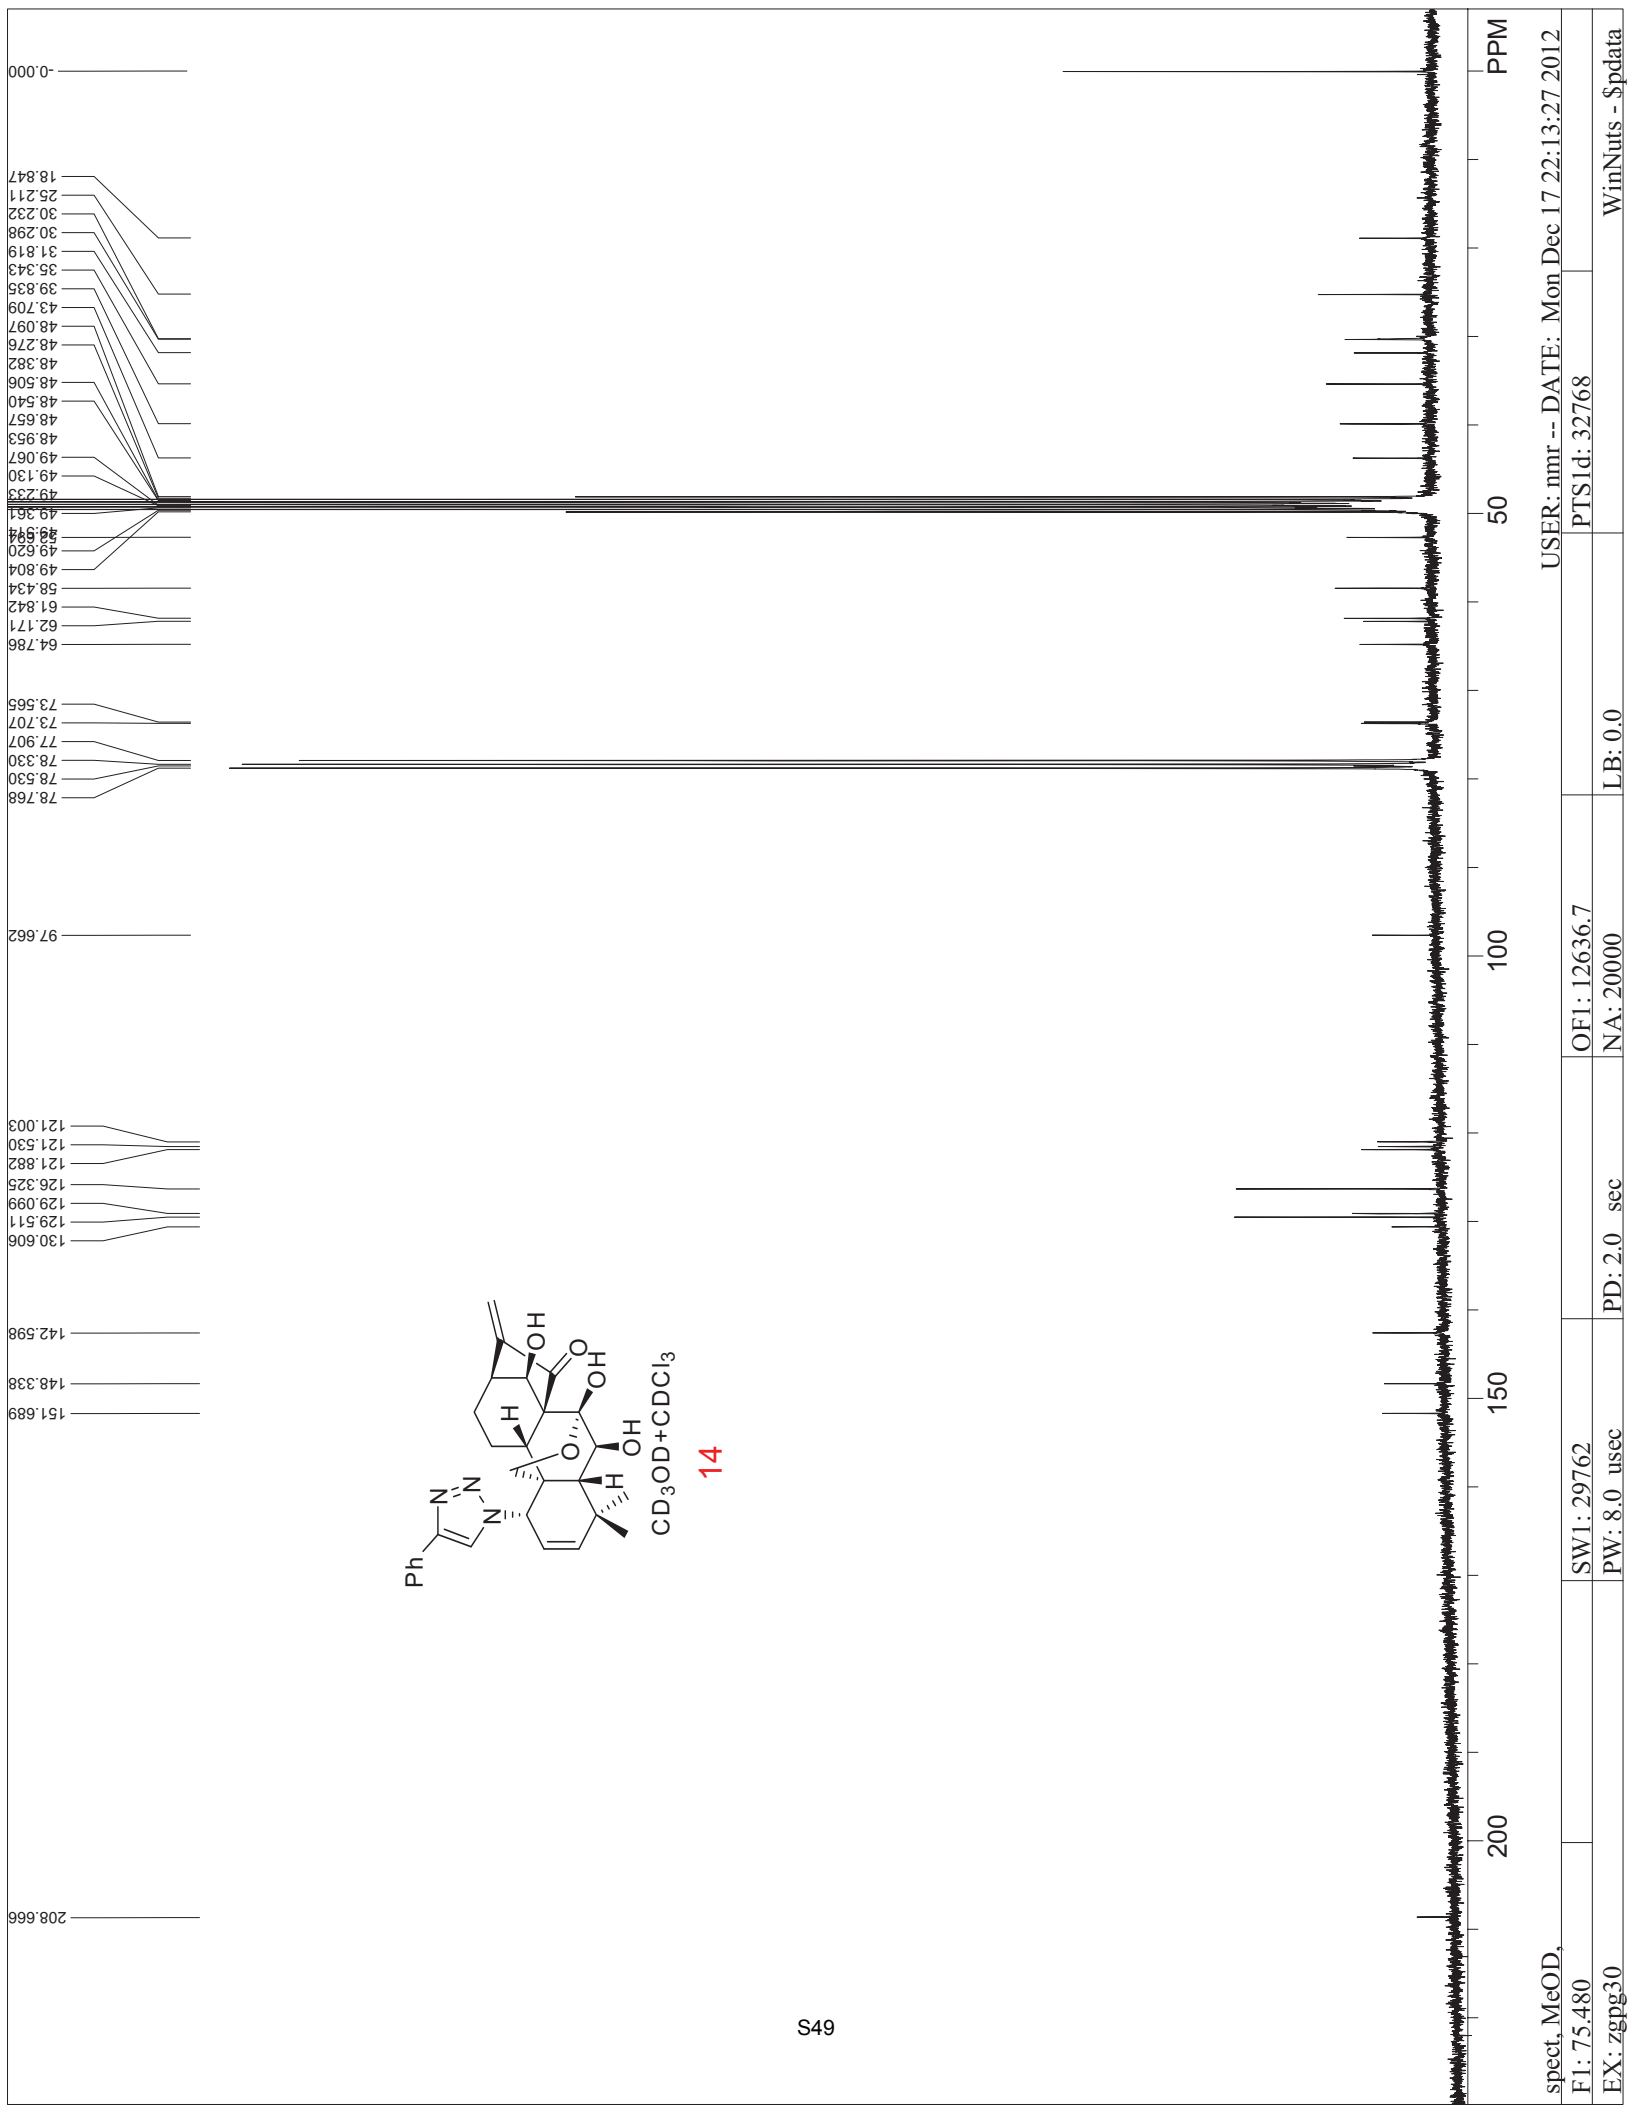

spect, MeOD, USER: nmr -- DATE: Mon Dec 17 22:13:27 2012  
 F1: 75.480 OF1: 12636.7 PTS1d: 32768  
 EX: zgpg30 PD: 2.0 sec NA: 20000 LB: 0.0 WinNuts - \$pdata

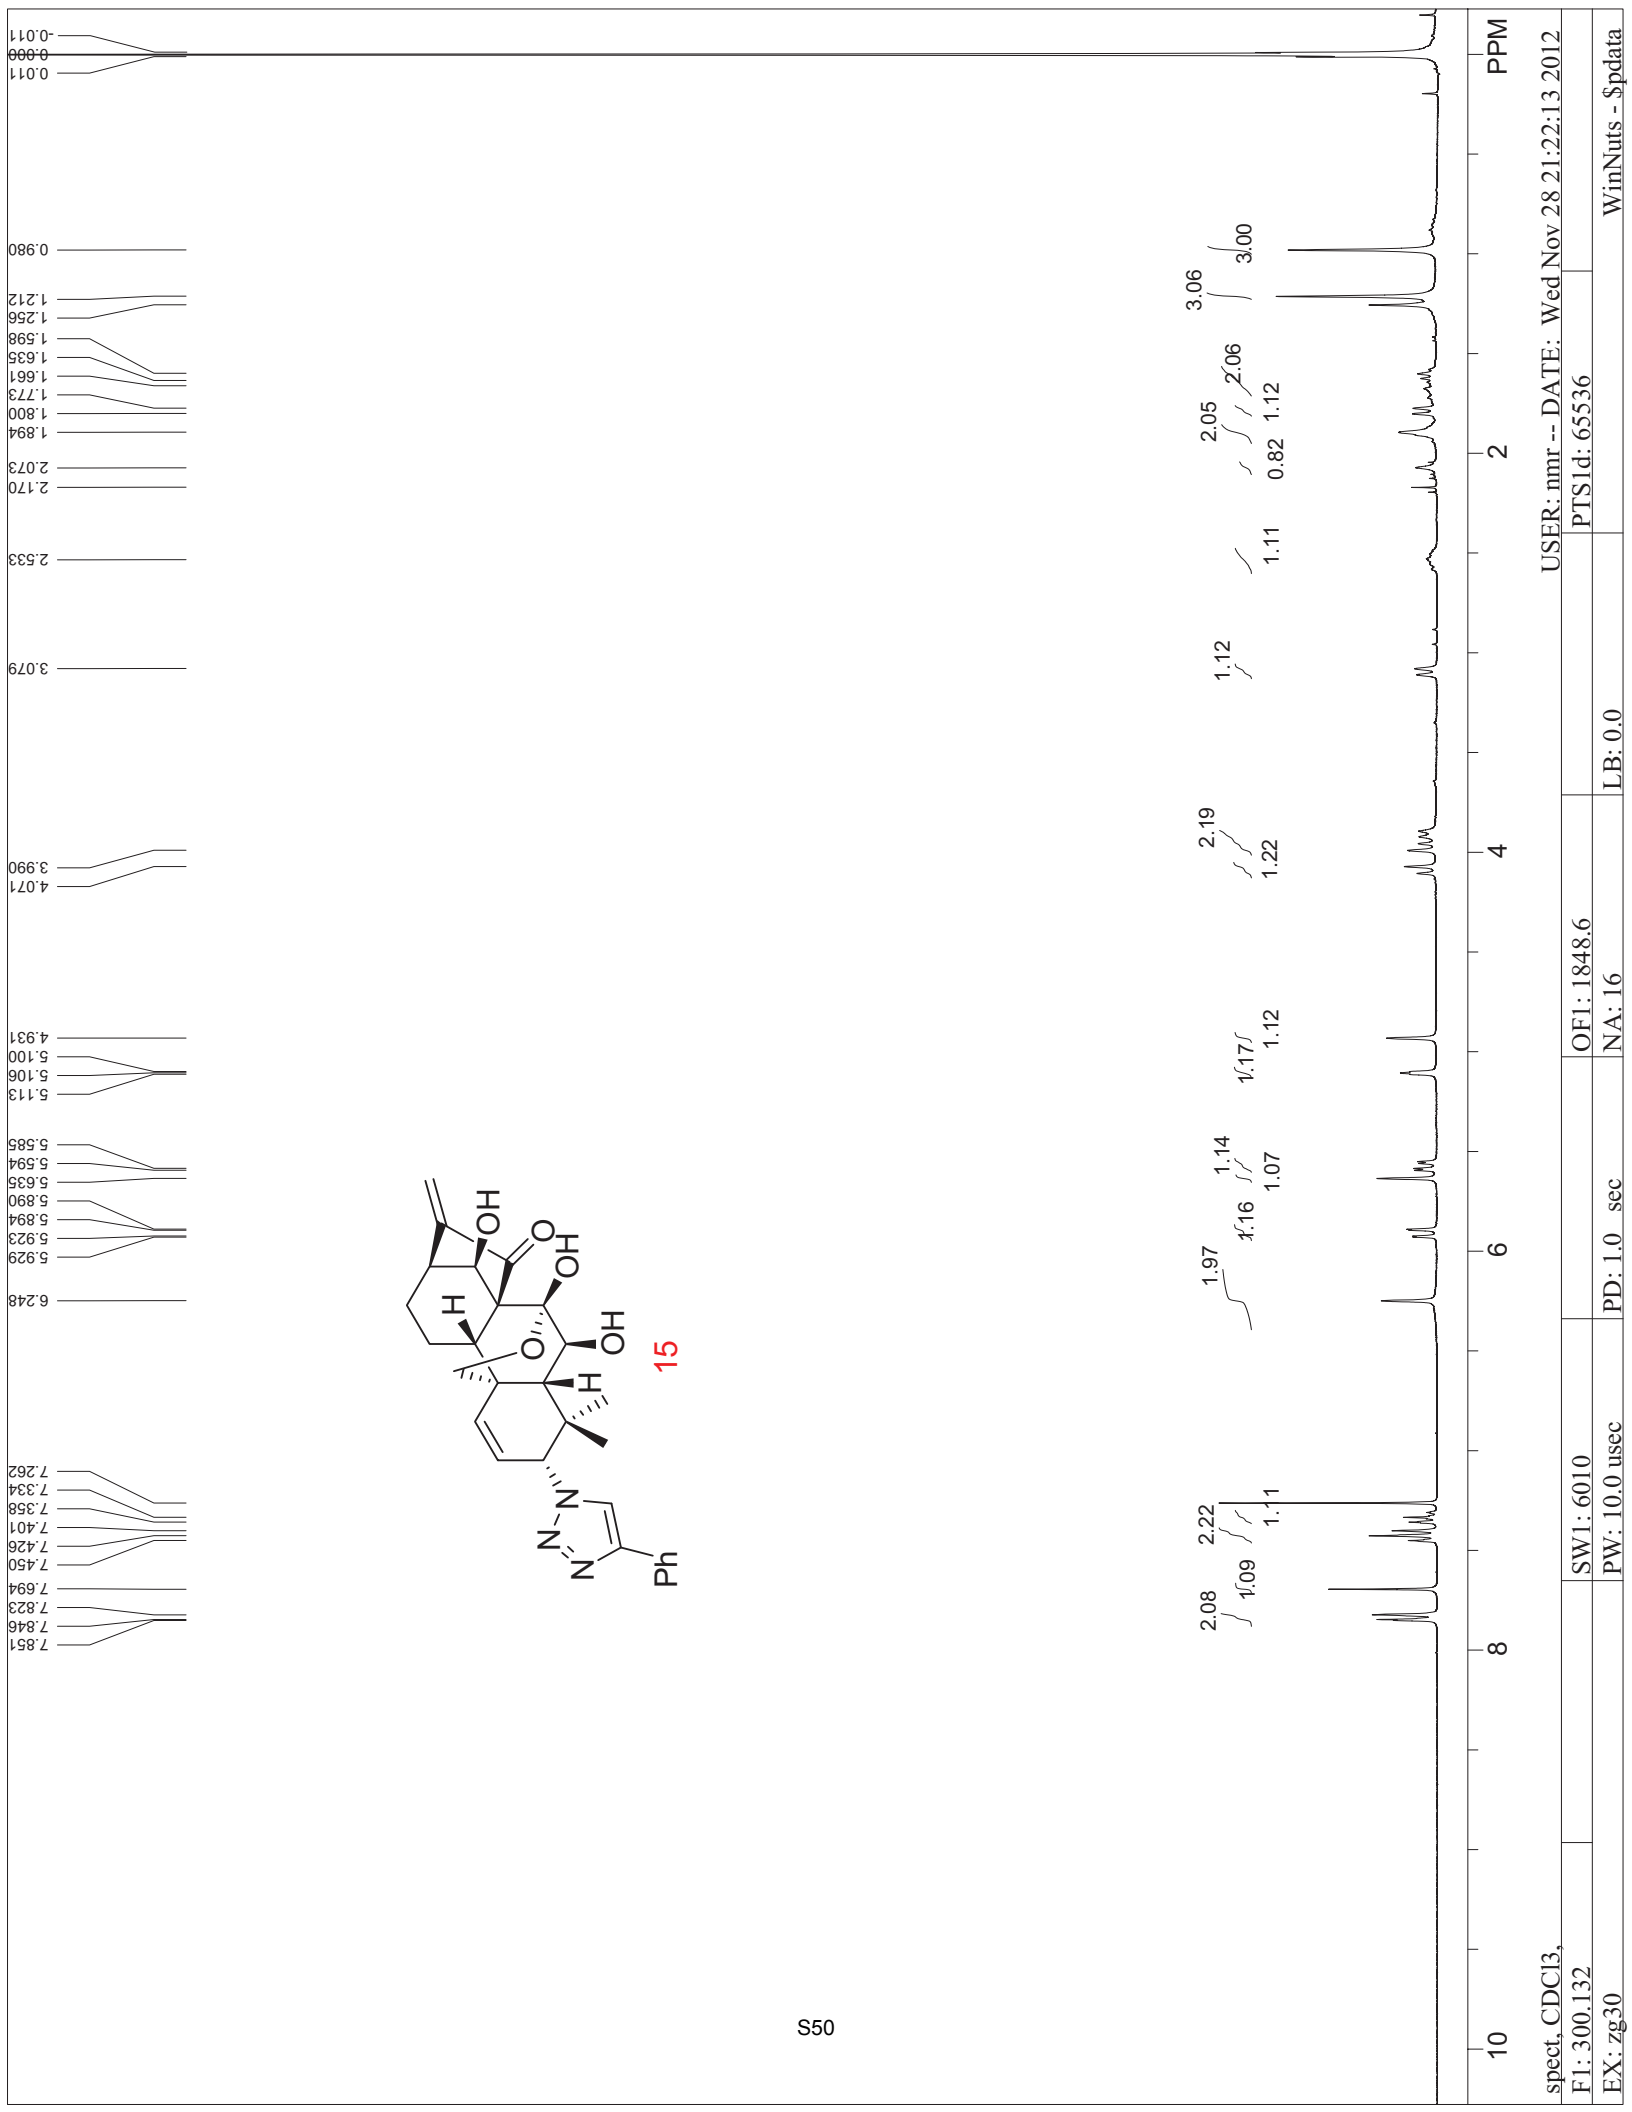

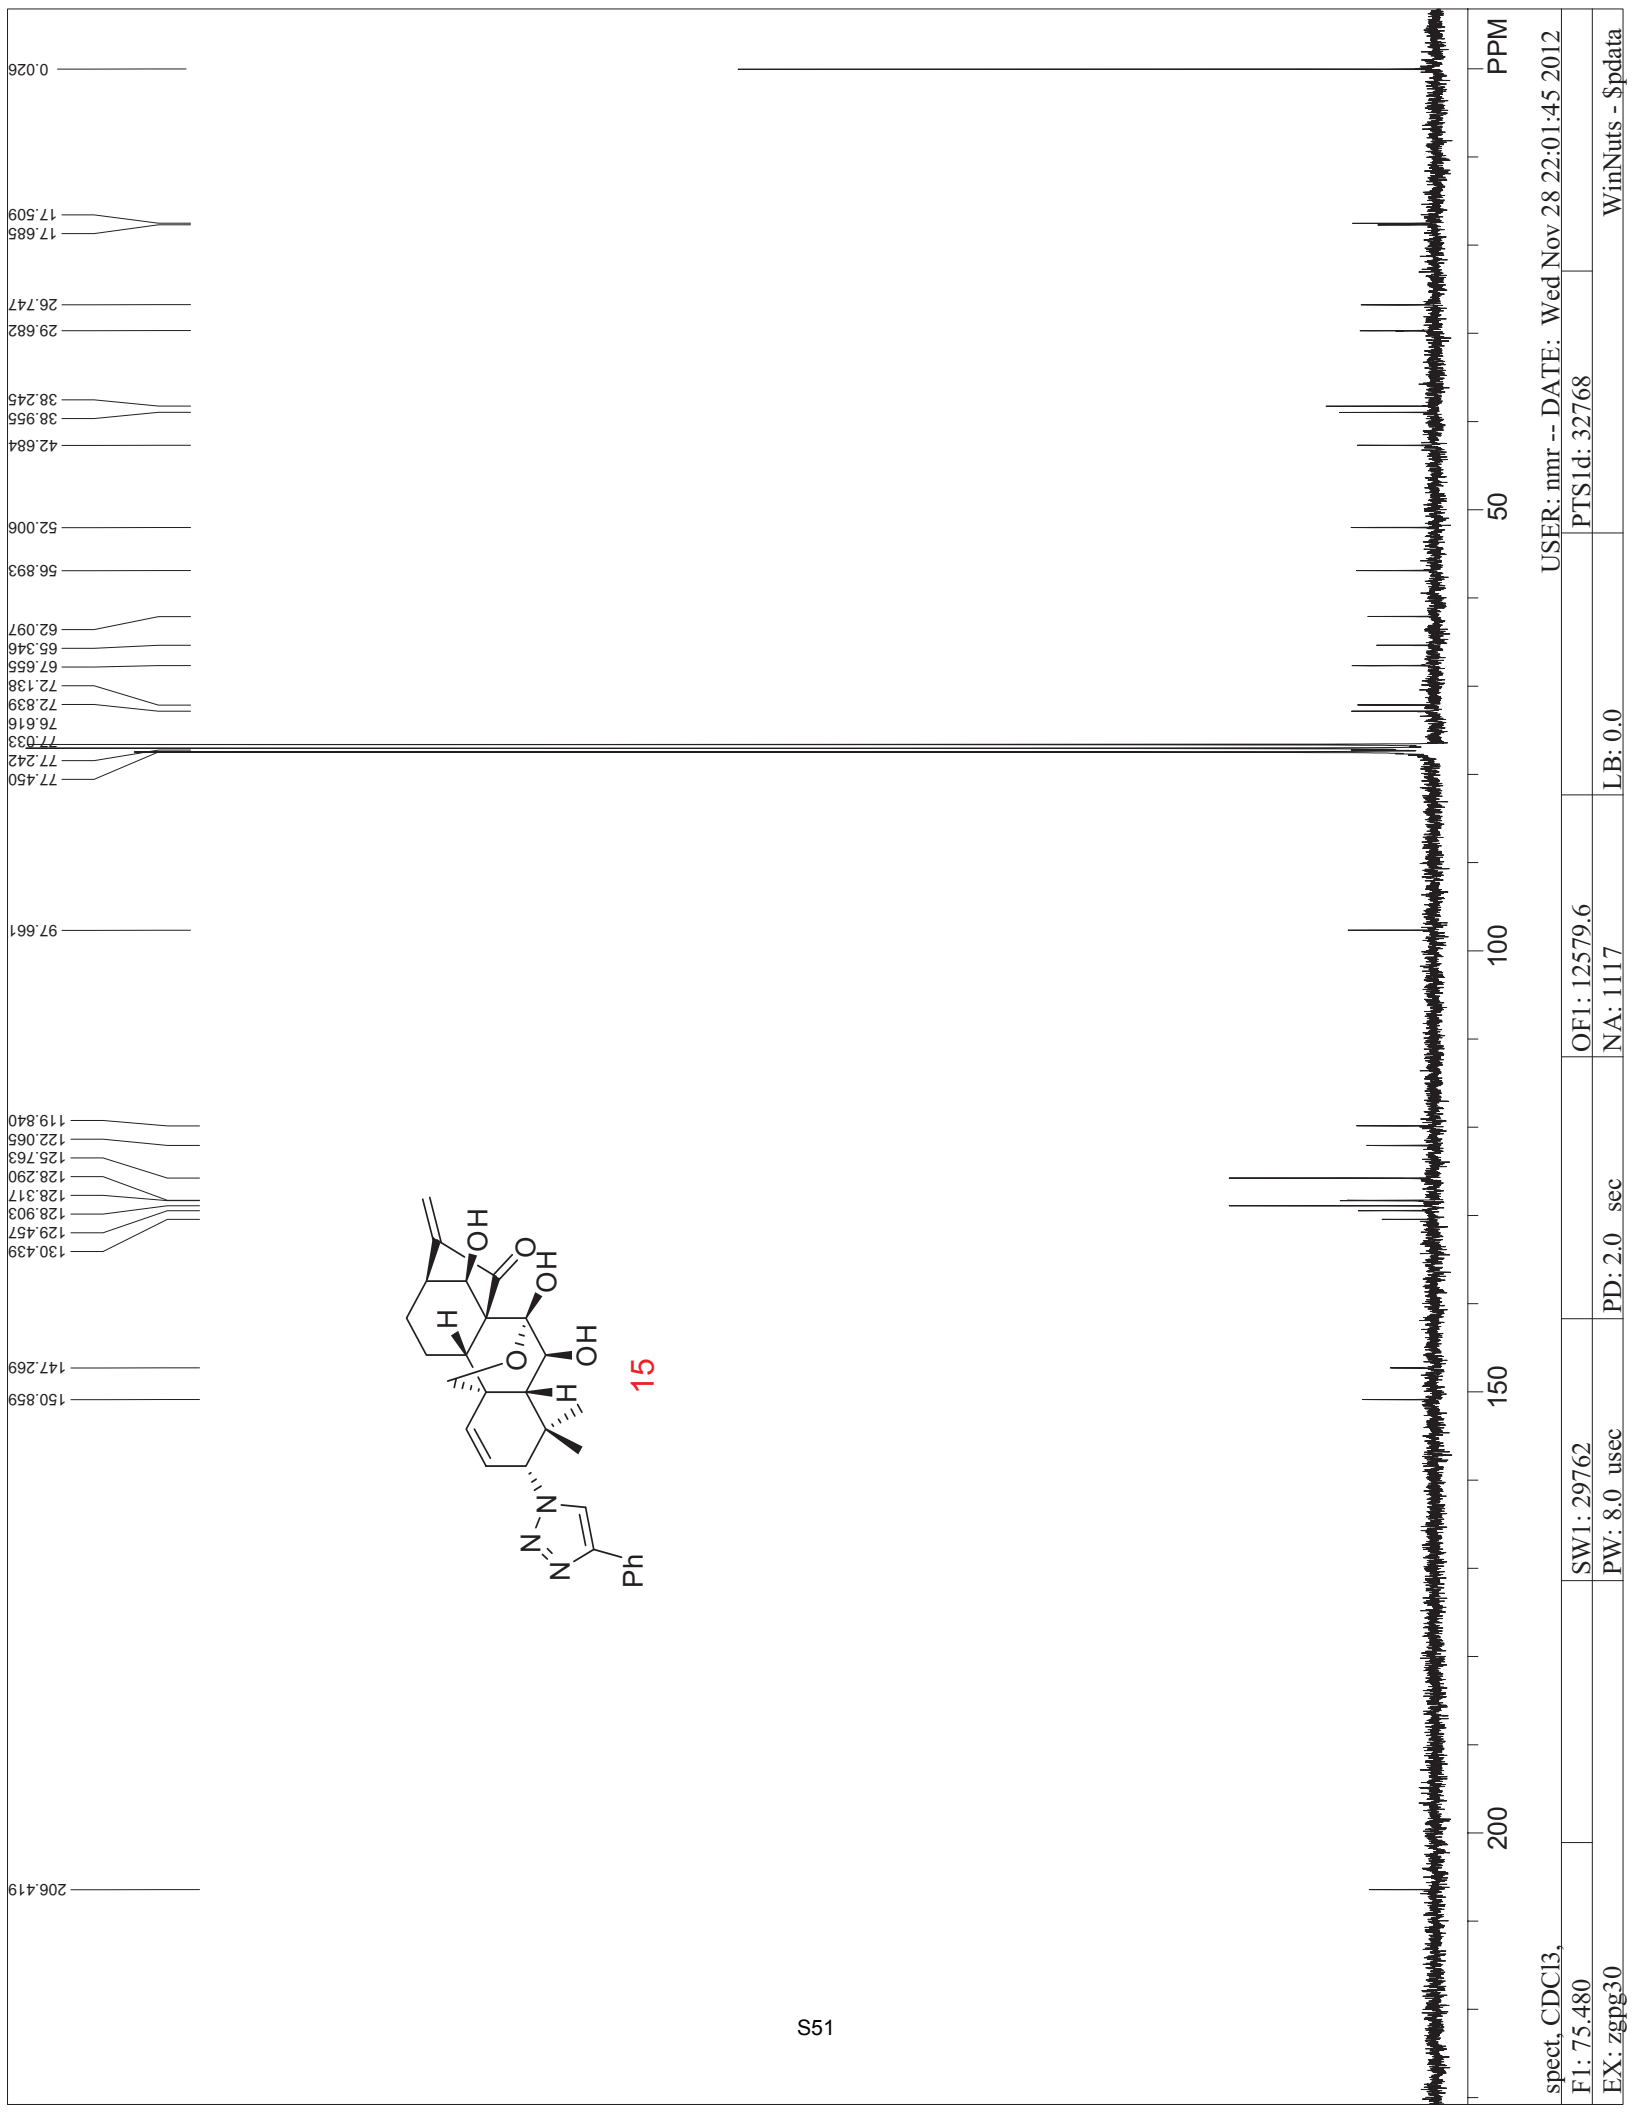

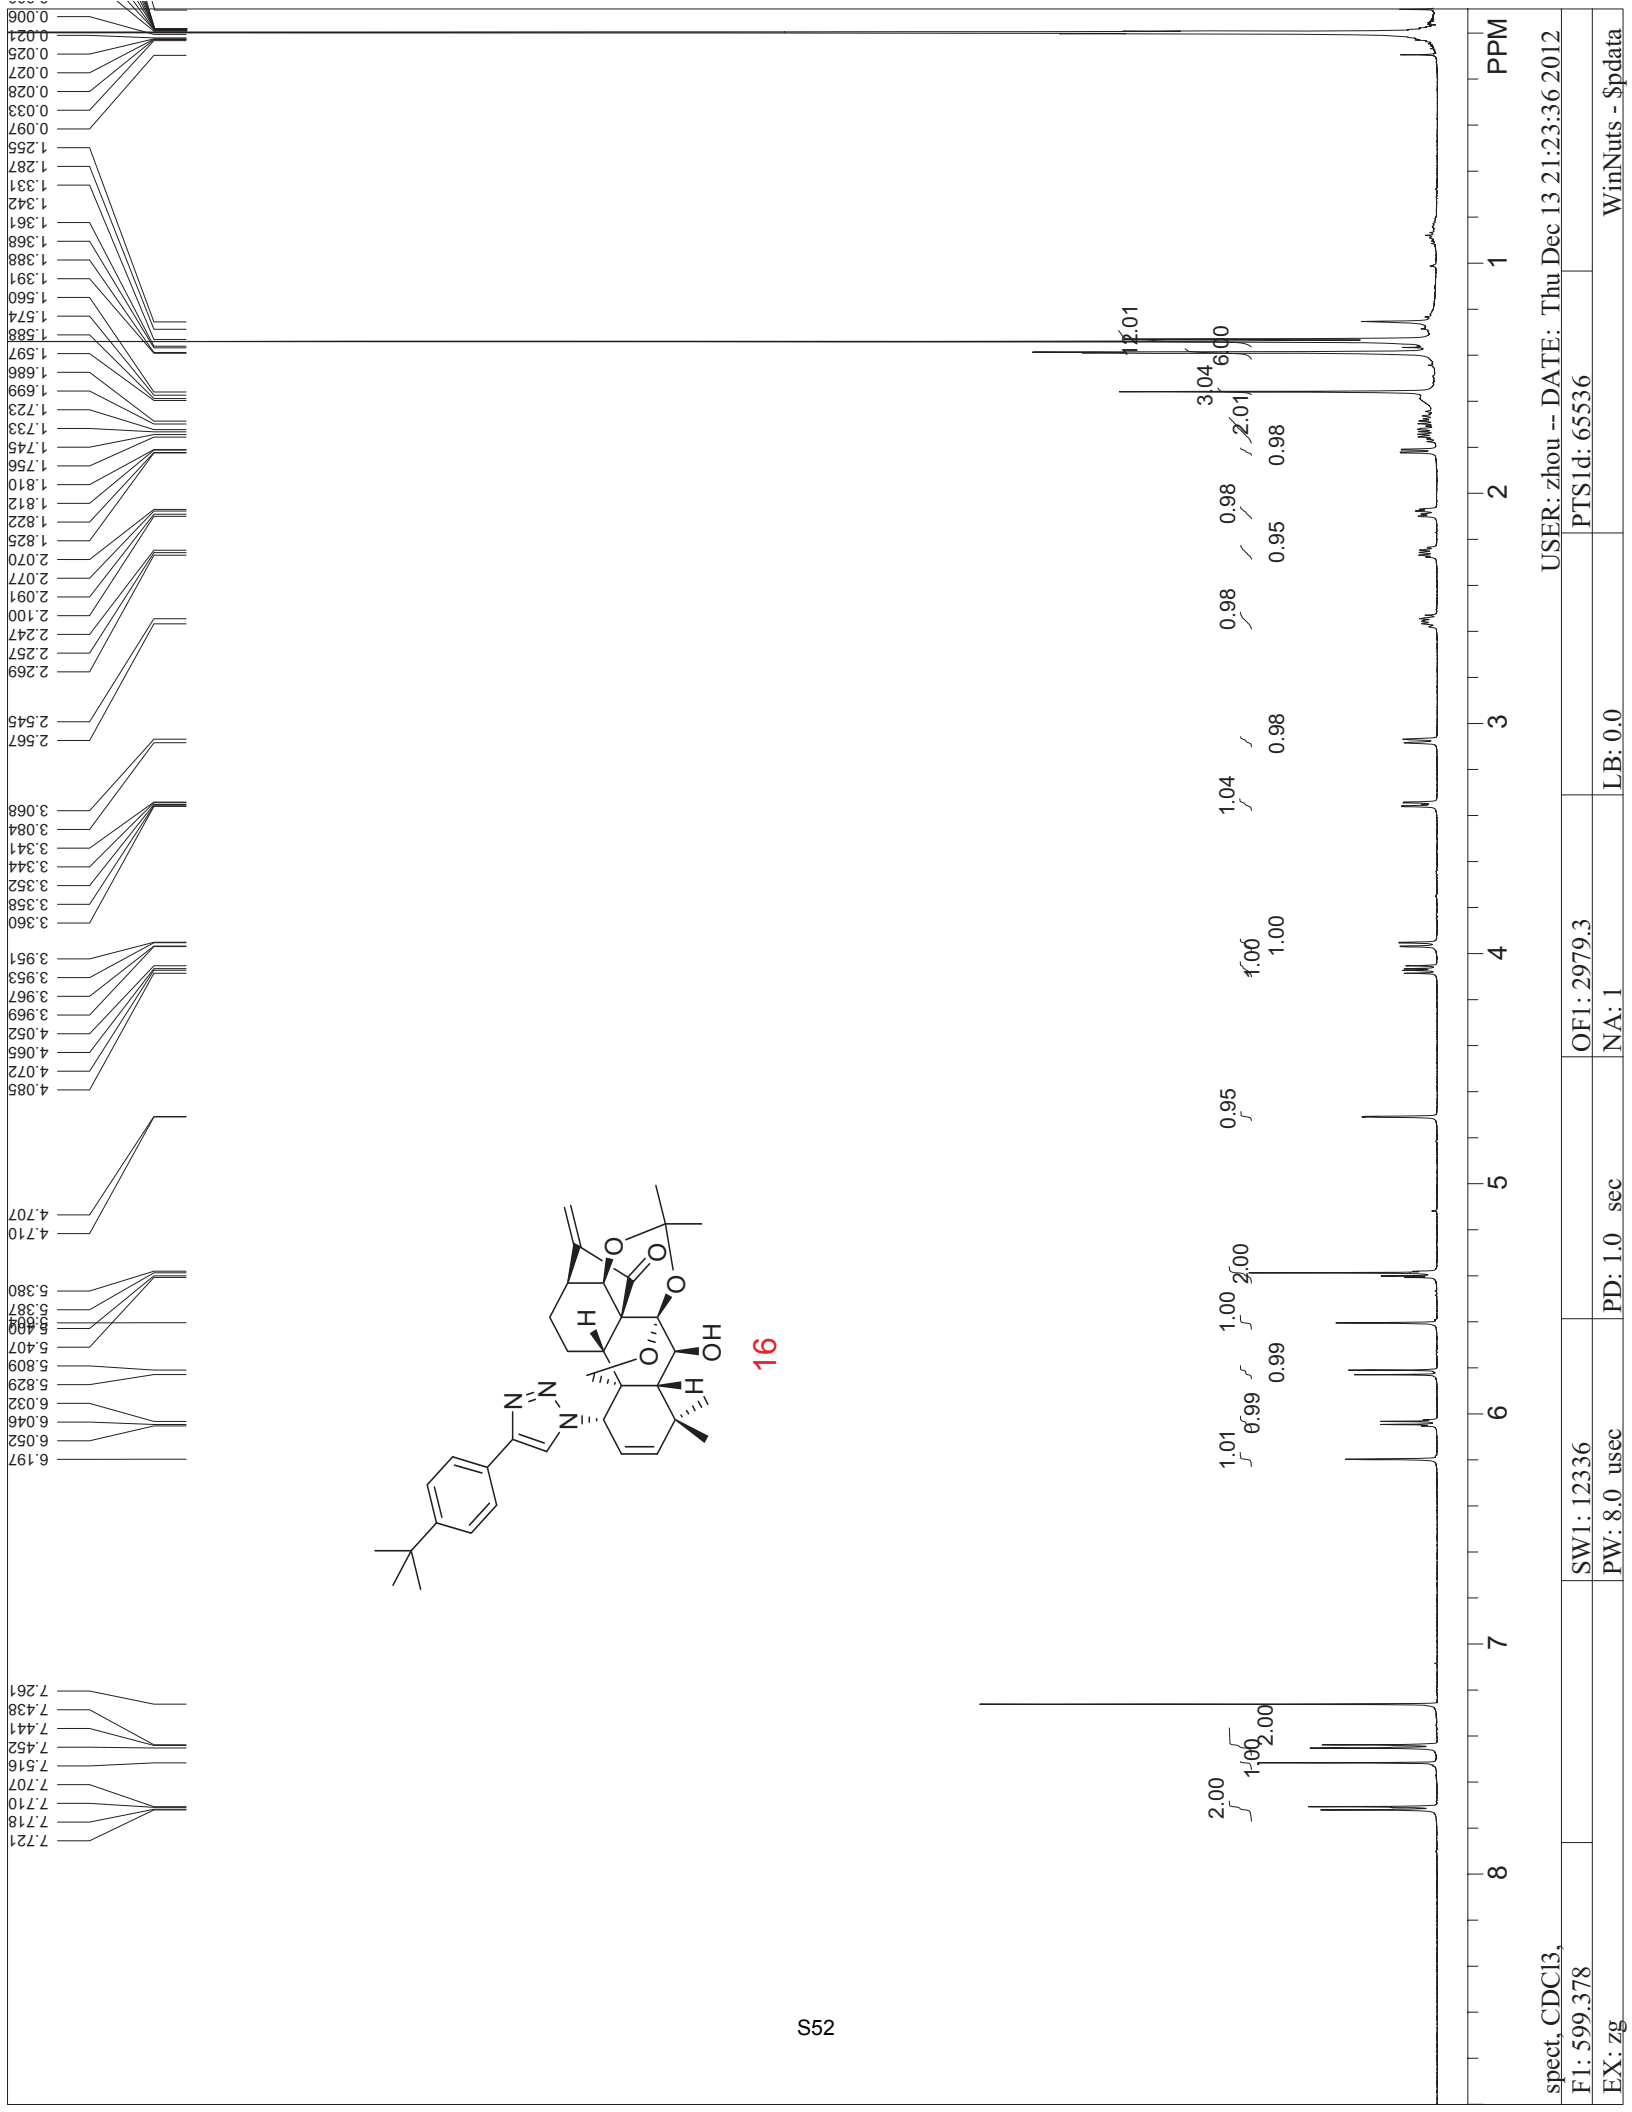

16

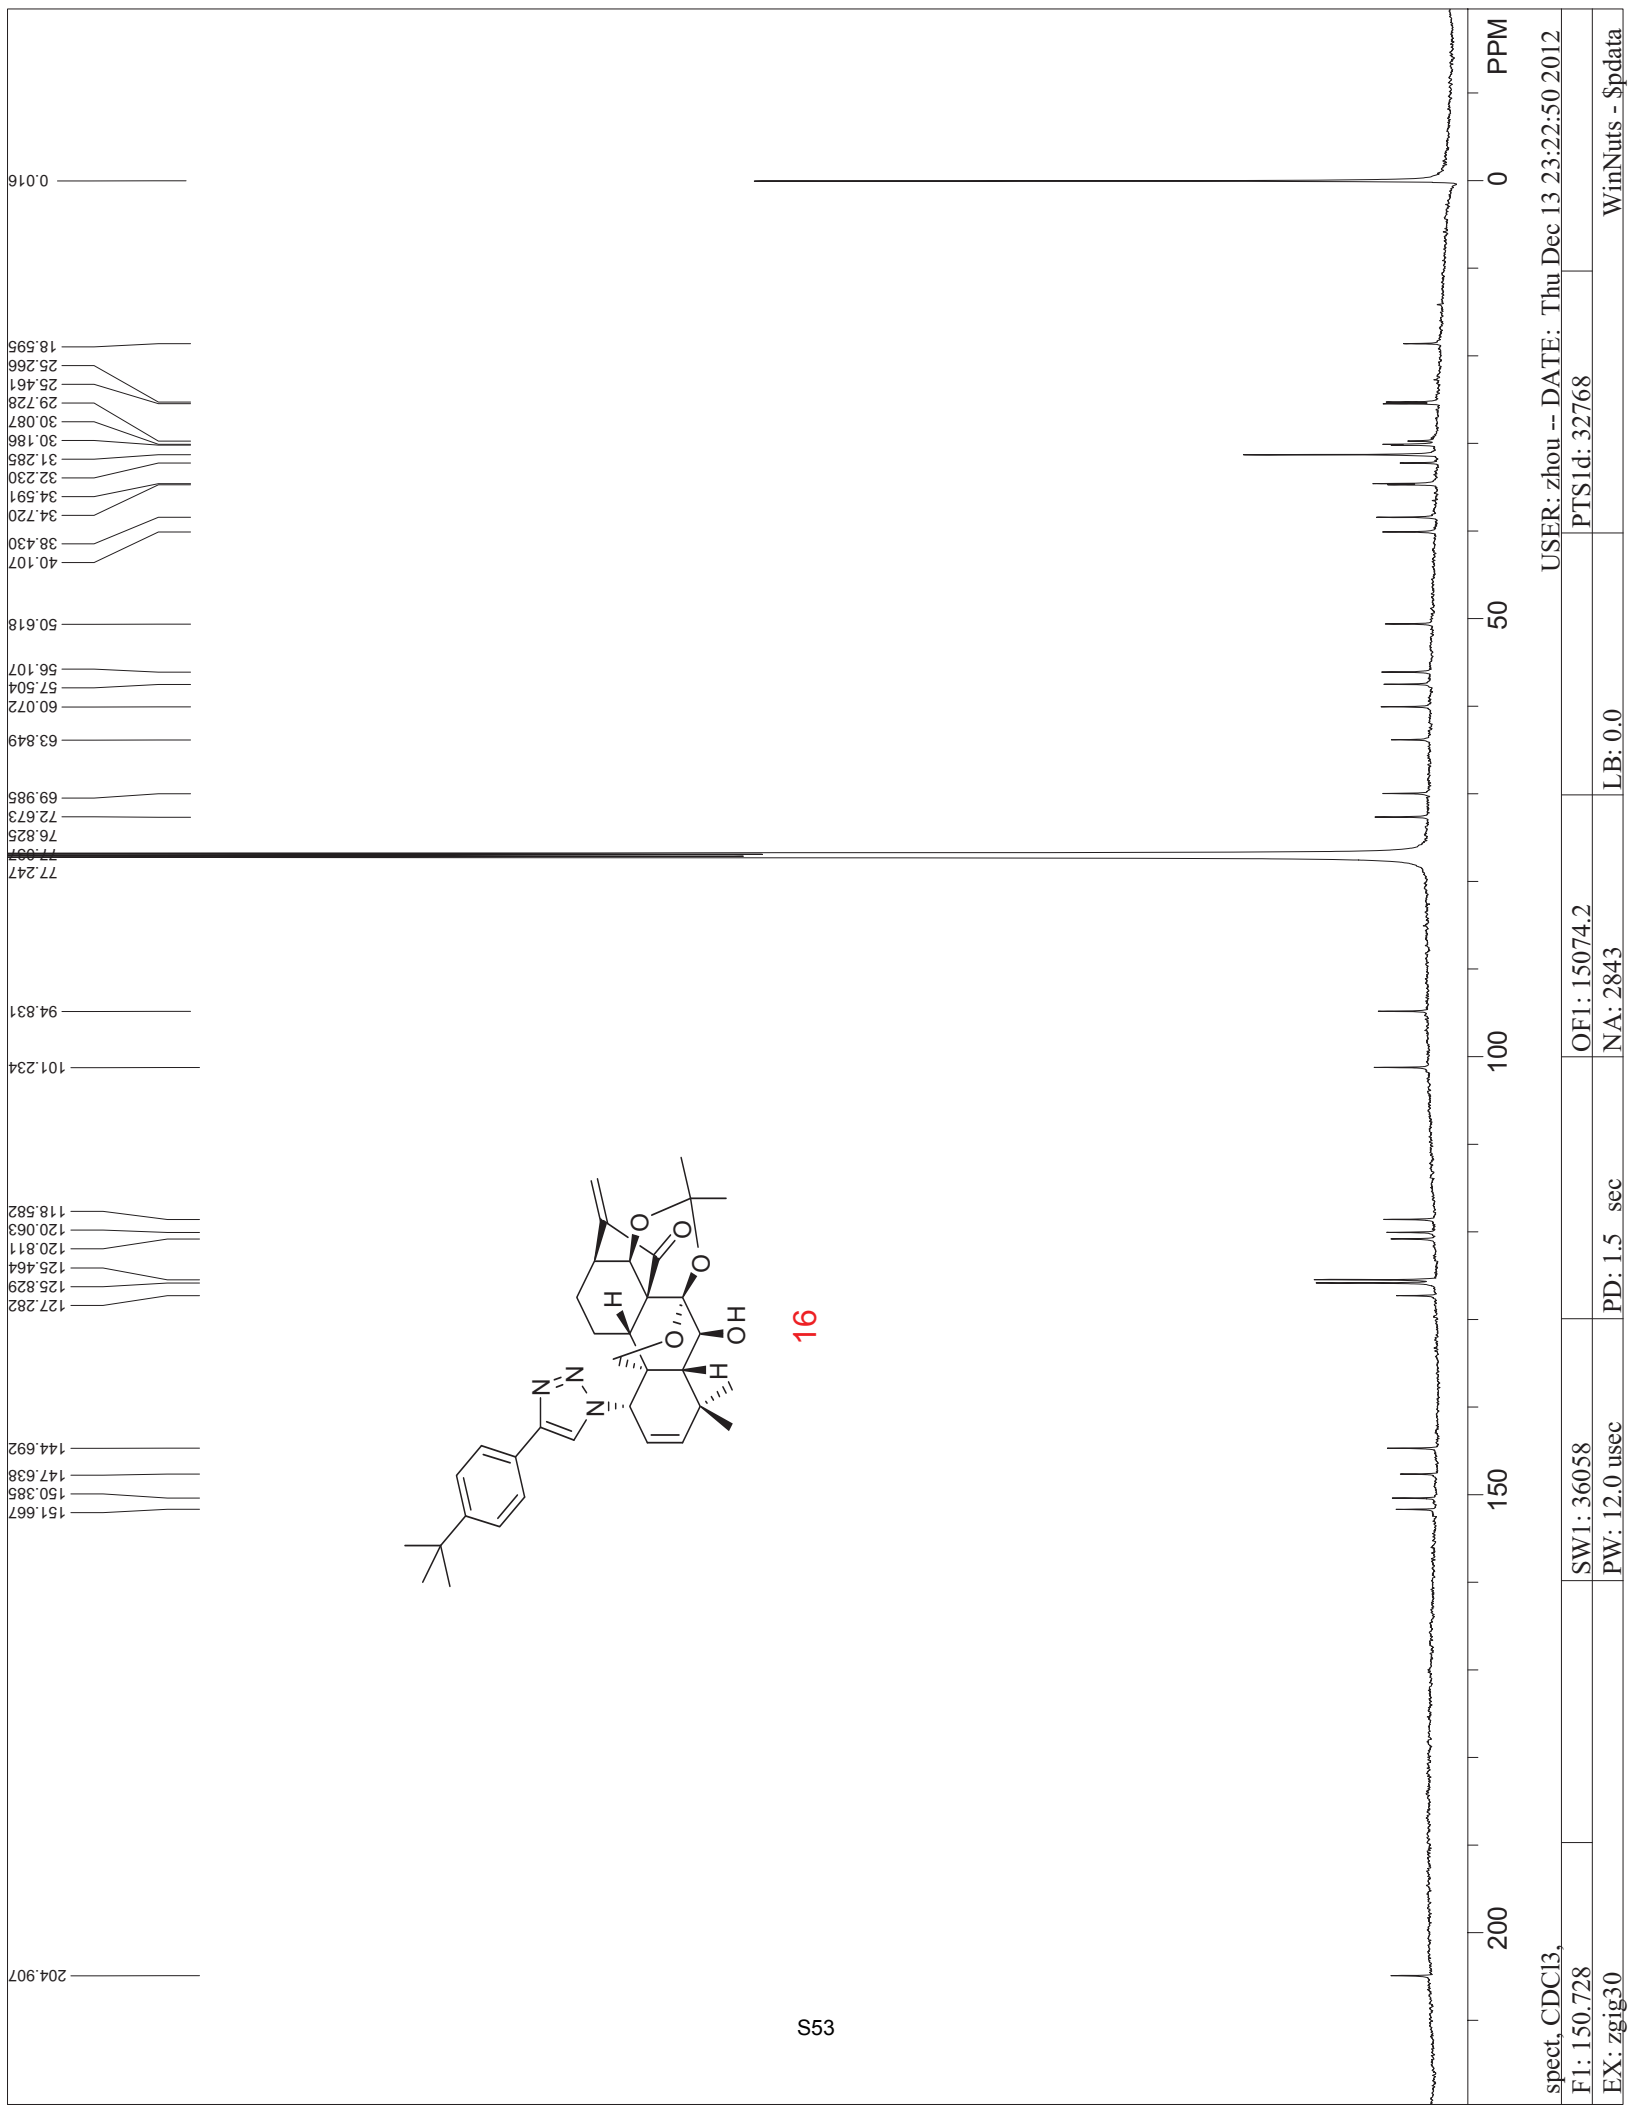

S53

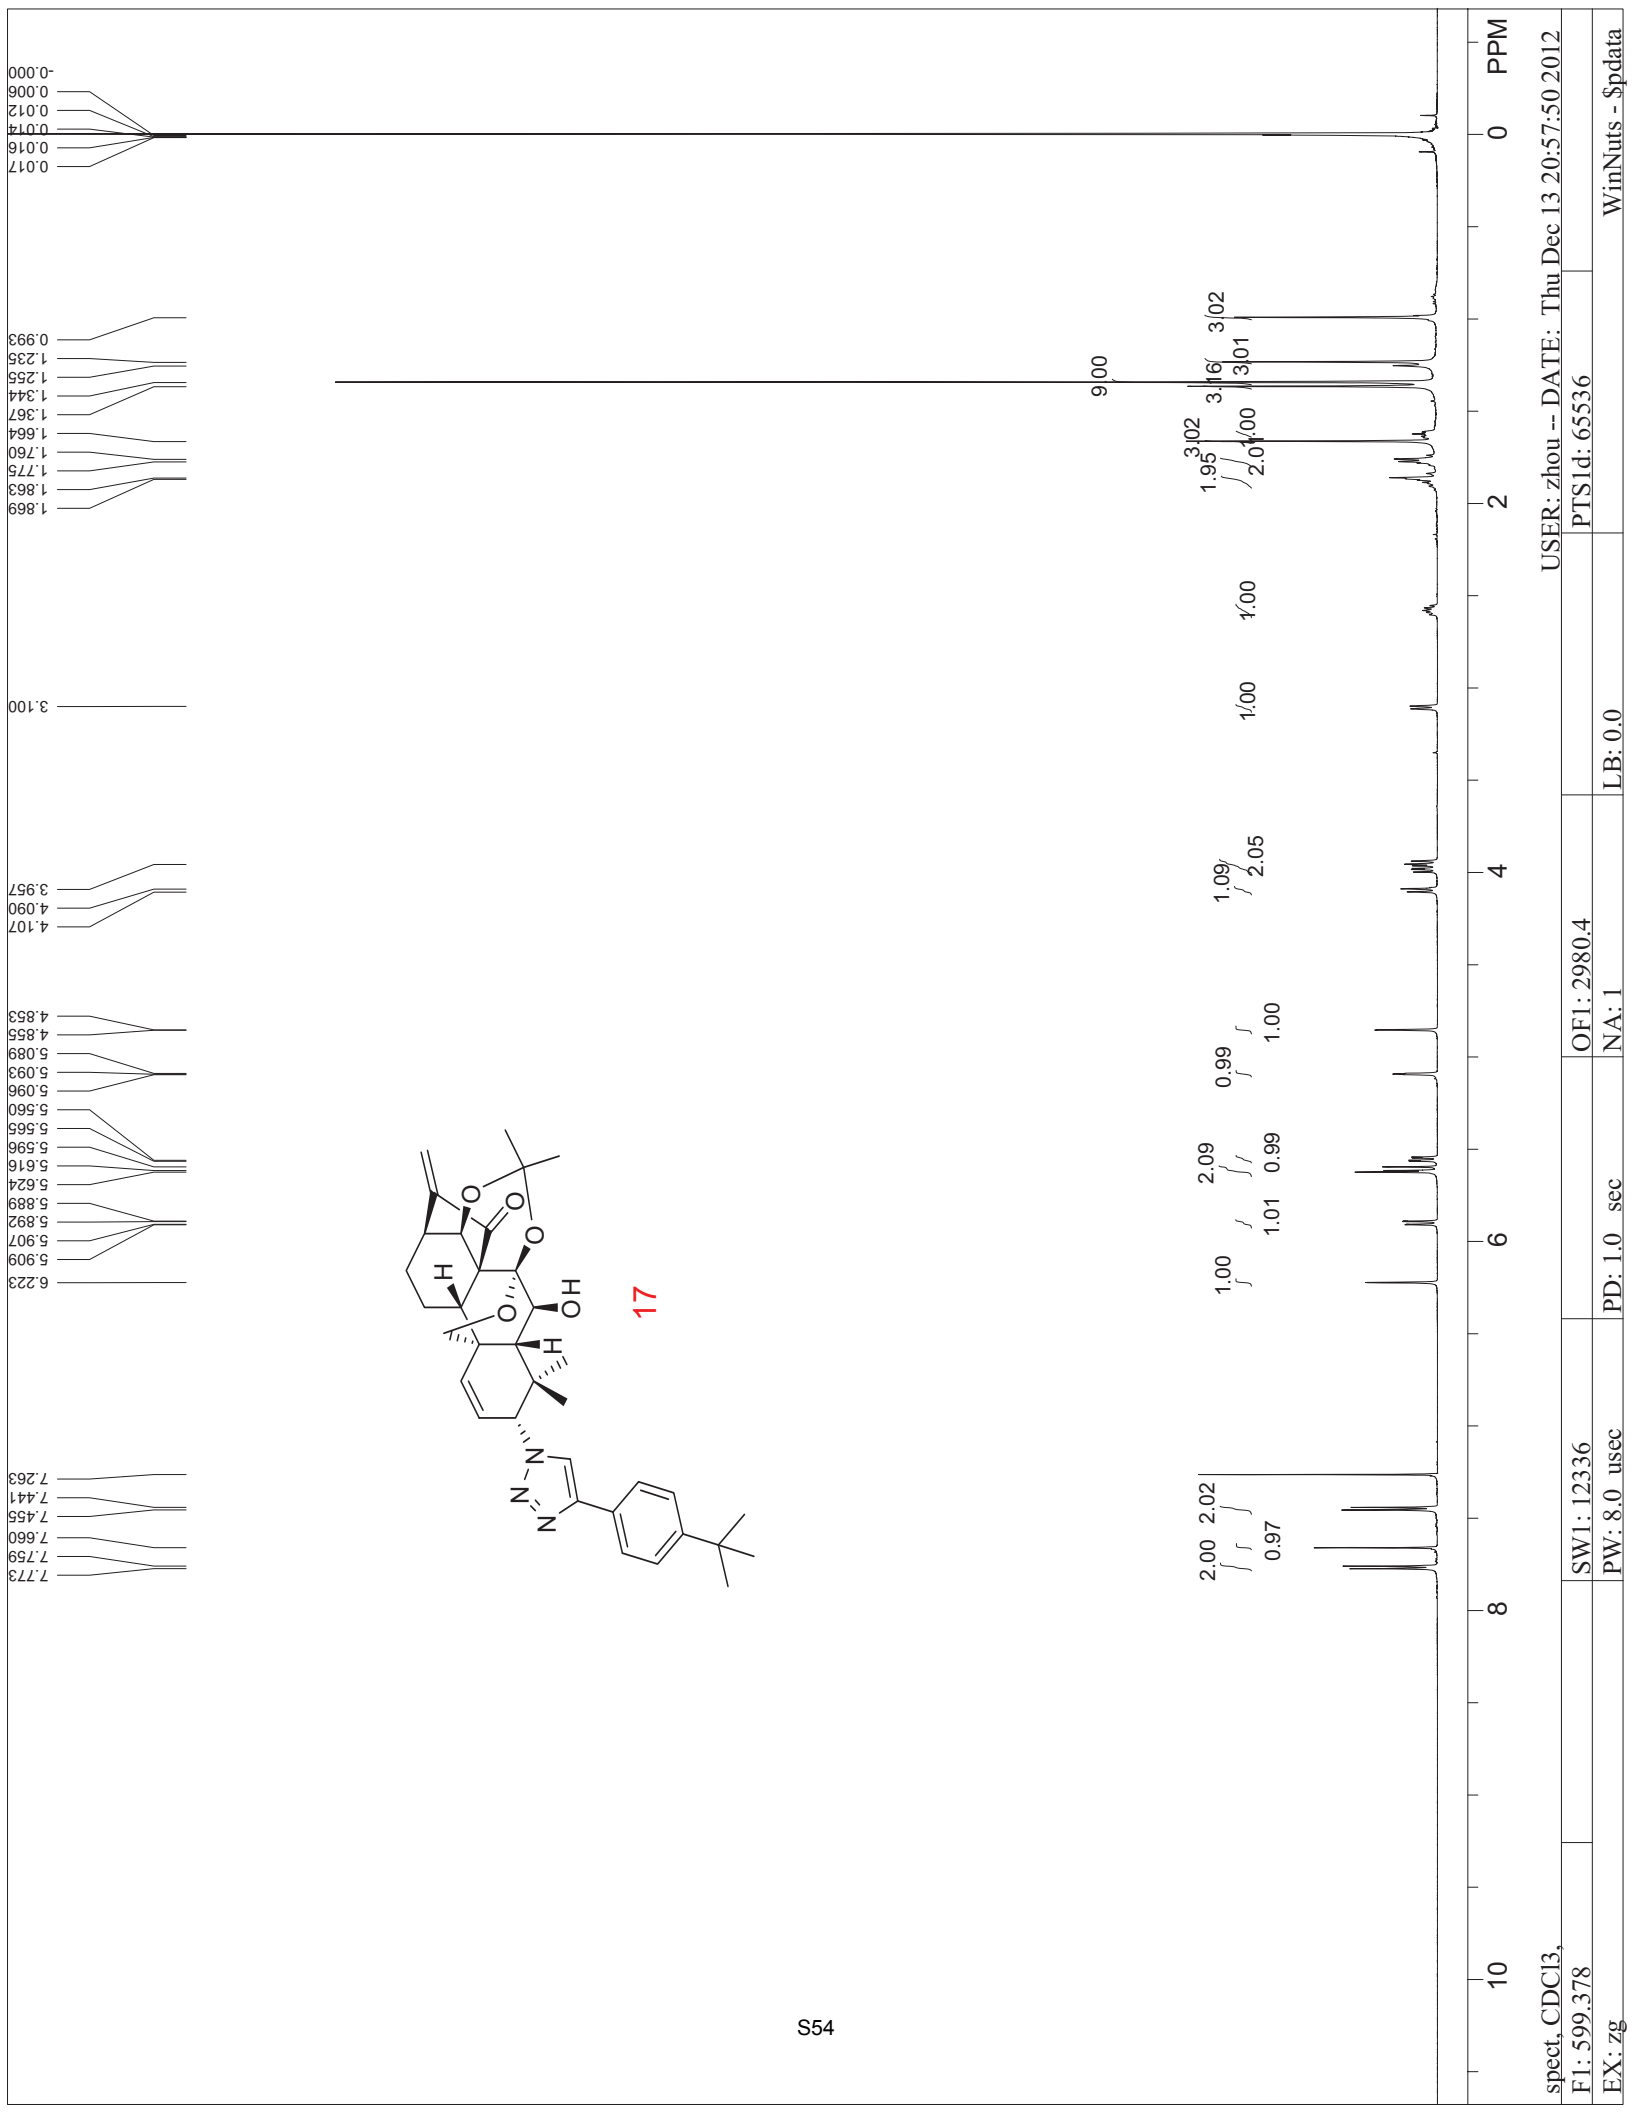

spect, CDC13, USER: zhou -- DATE: Thu Dec 13 20:57:50 2012  
 F1: 599.378 SW1: 12336 OF1: 2980.4 PTS1d: 65536  
 EX: zg PW: 8.0 usec PD: 1.0 sec NA: 1 LB: 0.0 WinNuts - \$pdata

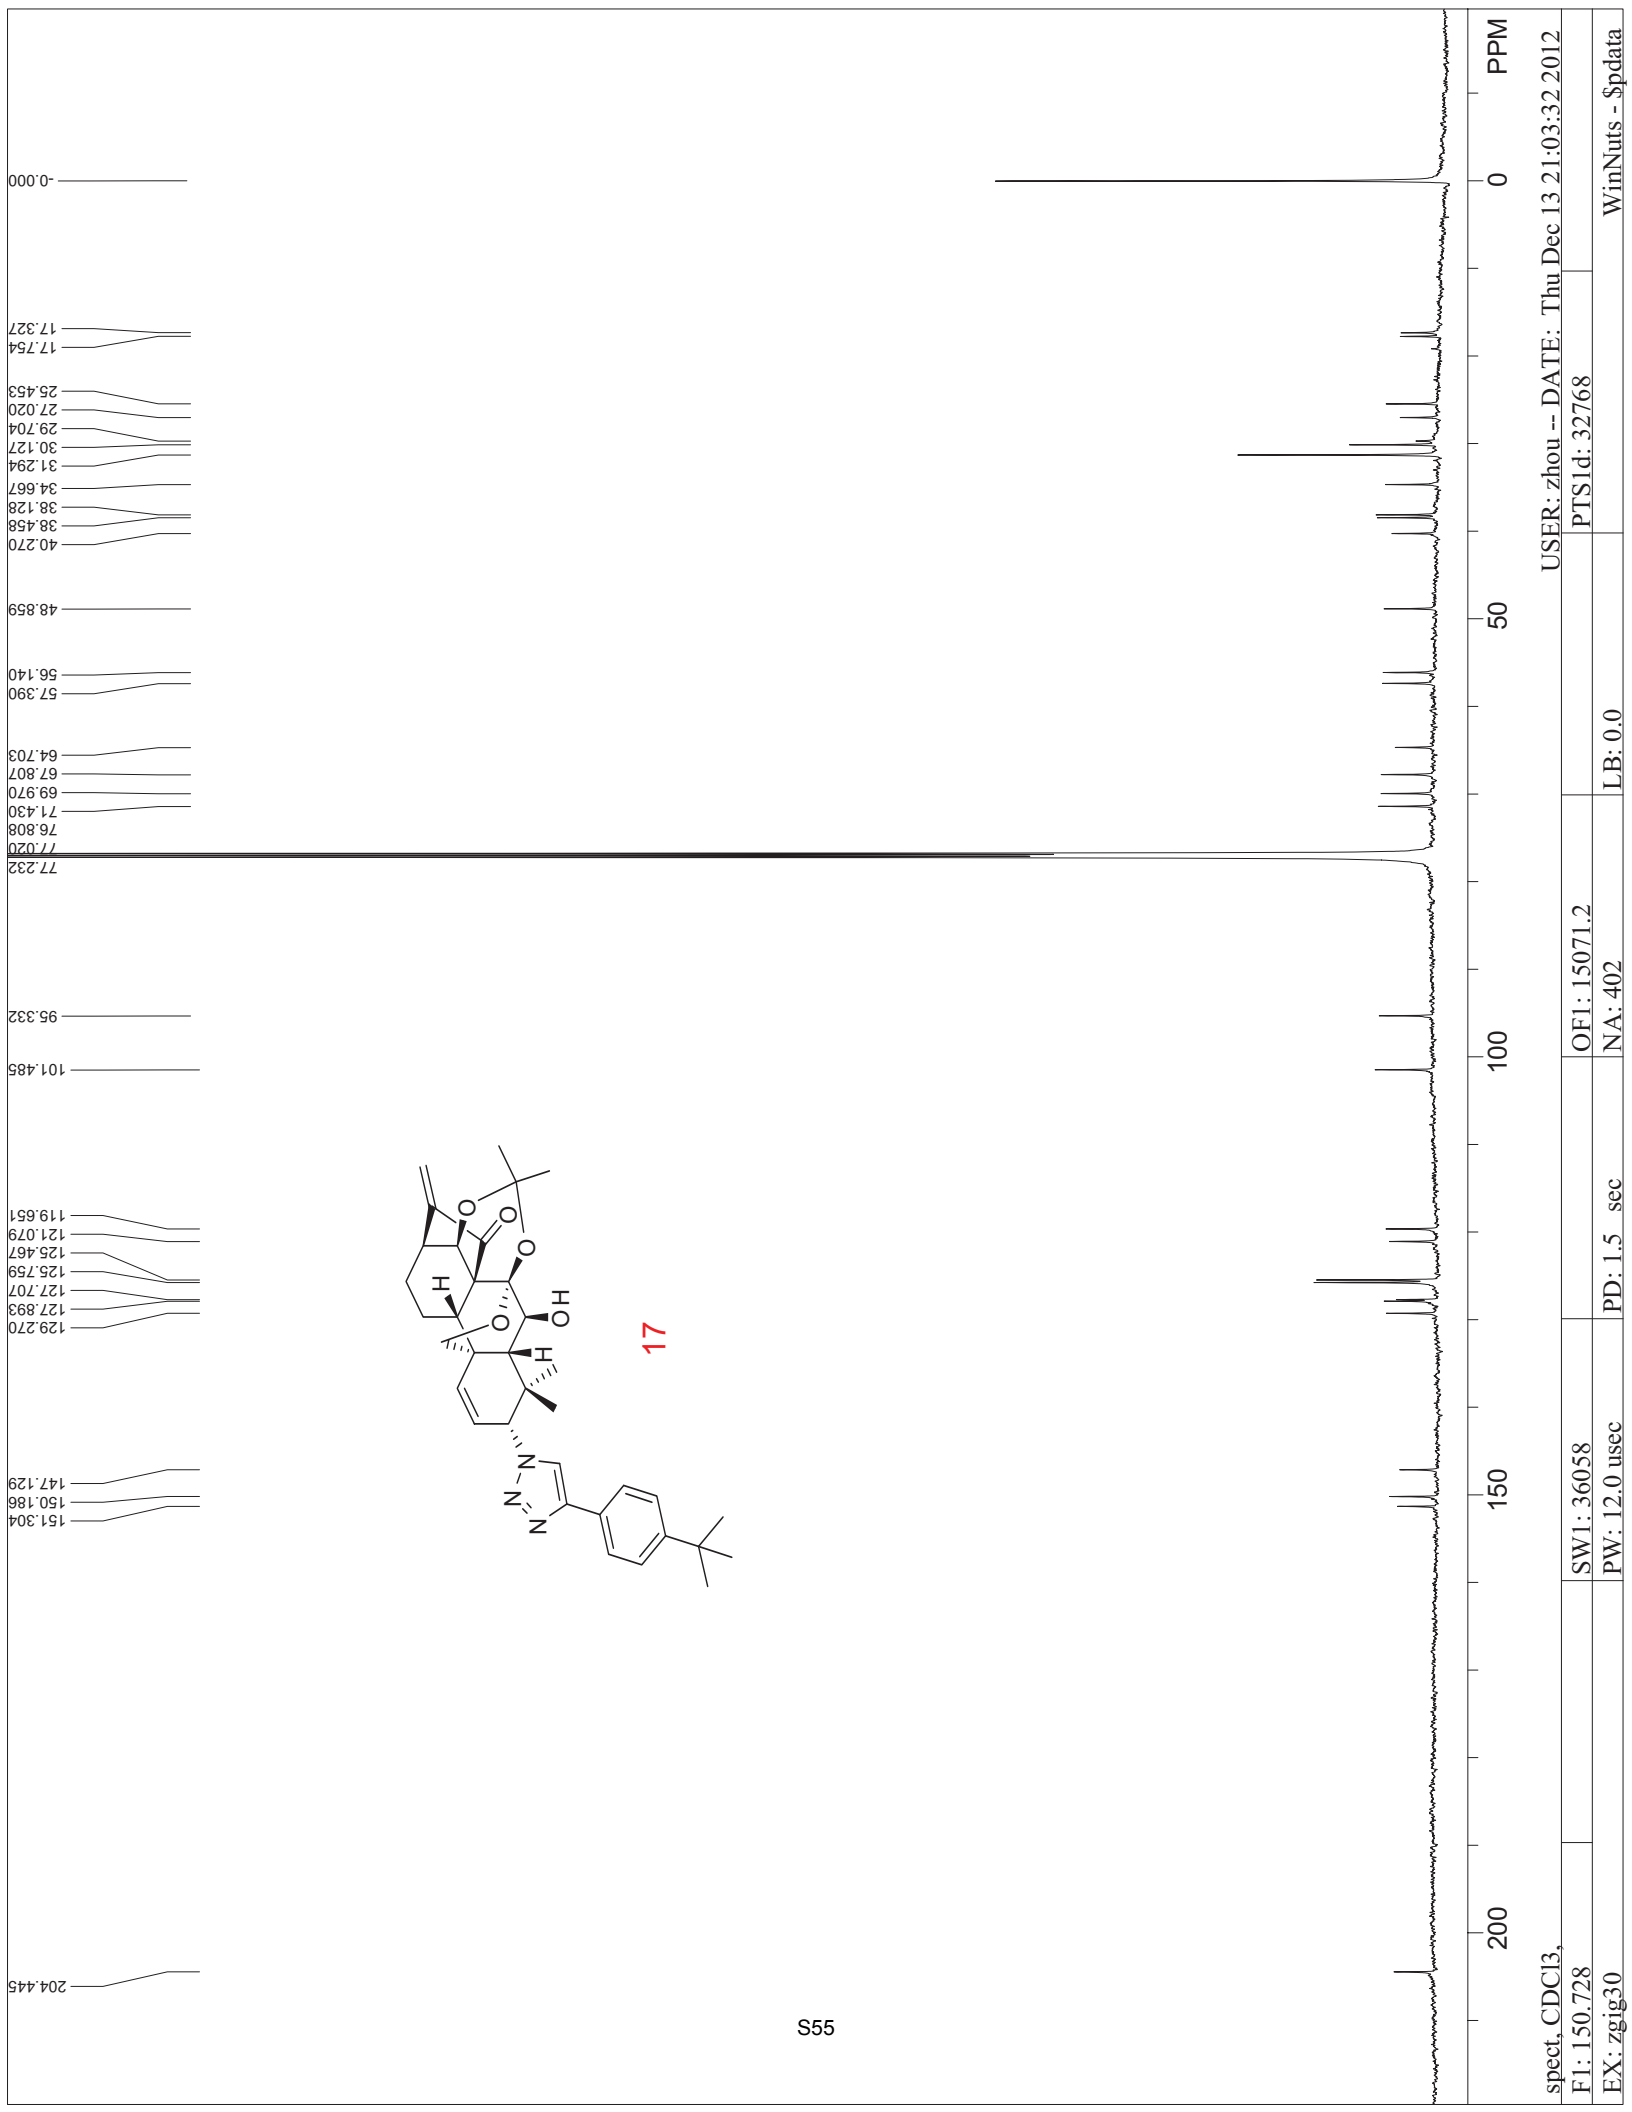

spect, CDCI3, USER: zhou -- DATE: Thu Dec 13 21:03:32 2012  
 F1: 150.728 OF1: 15071.2 PTS1d: 32768  
 EX: zgig30 SW1: 36058 NA: 402 LB: 0.0  
 PD: 1.5 sec WinNuts - \$pdata

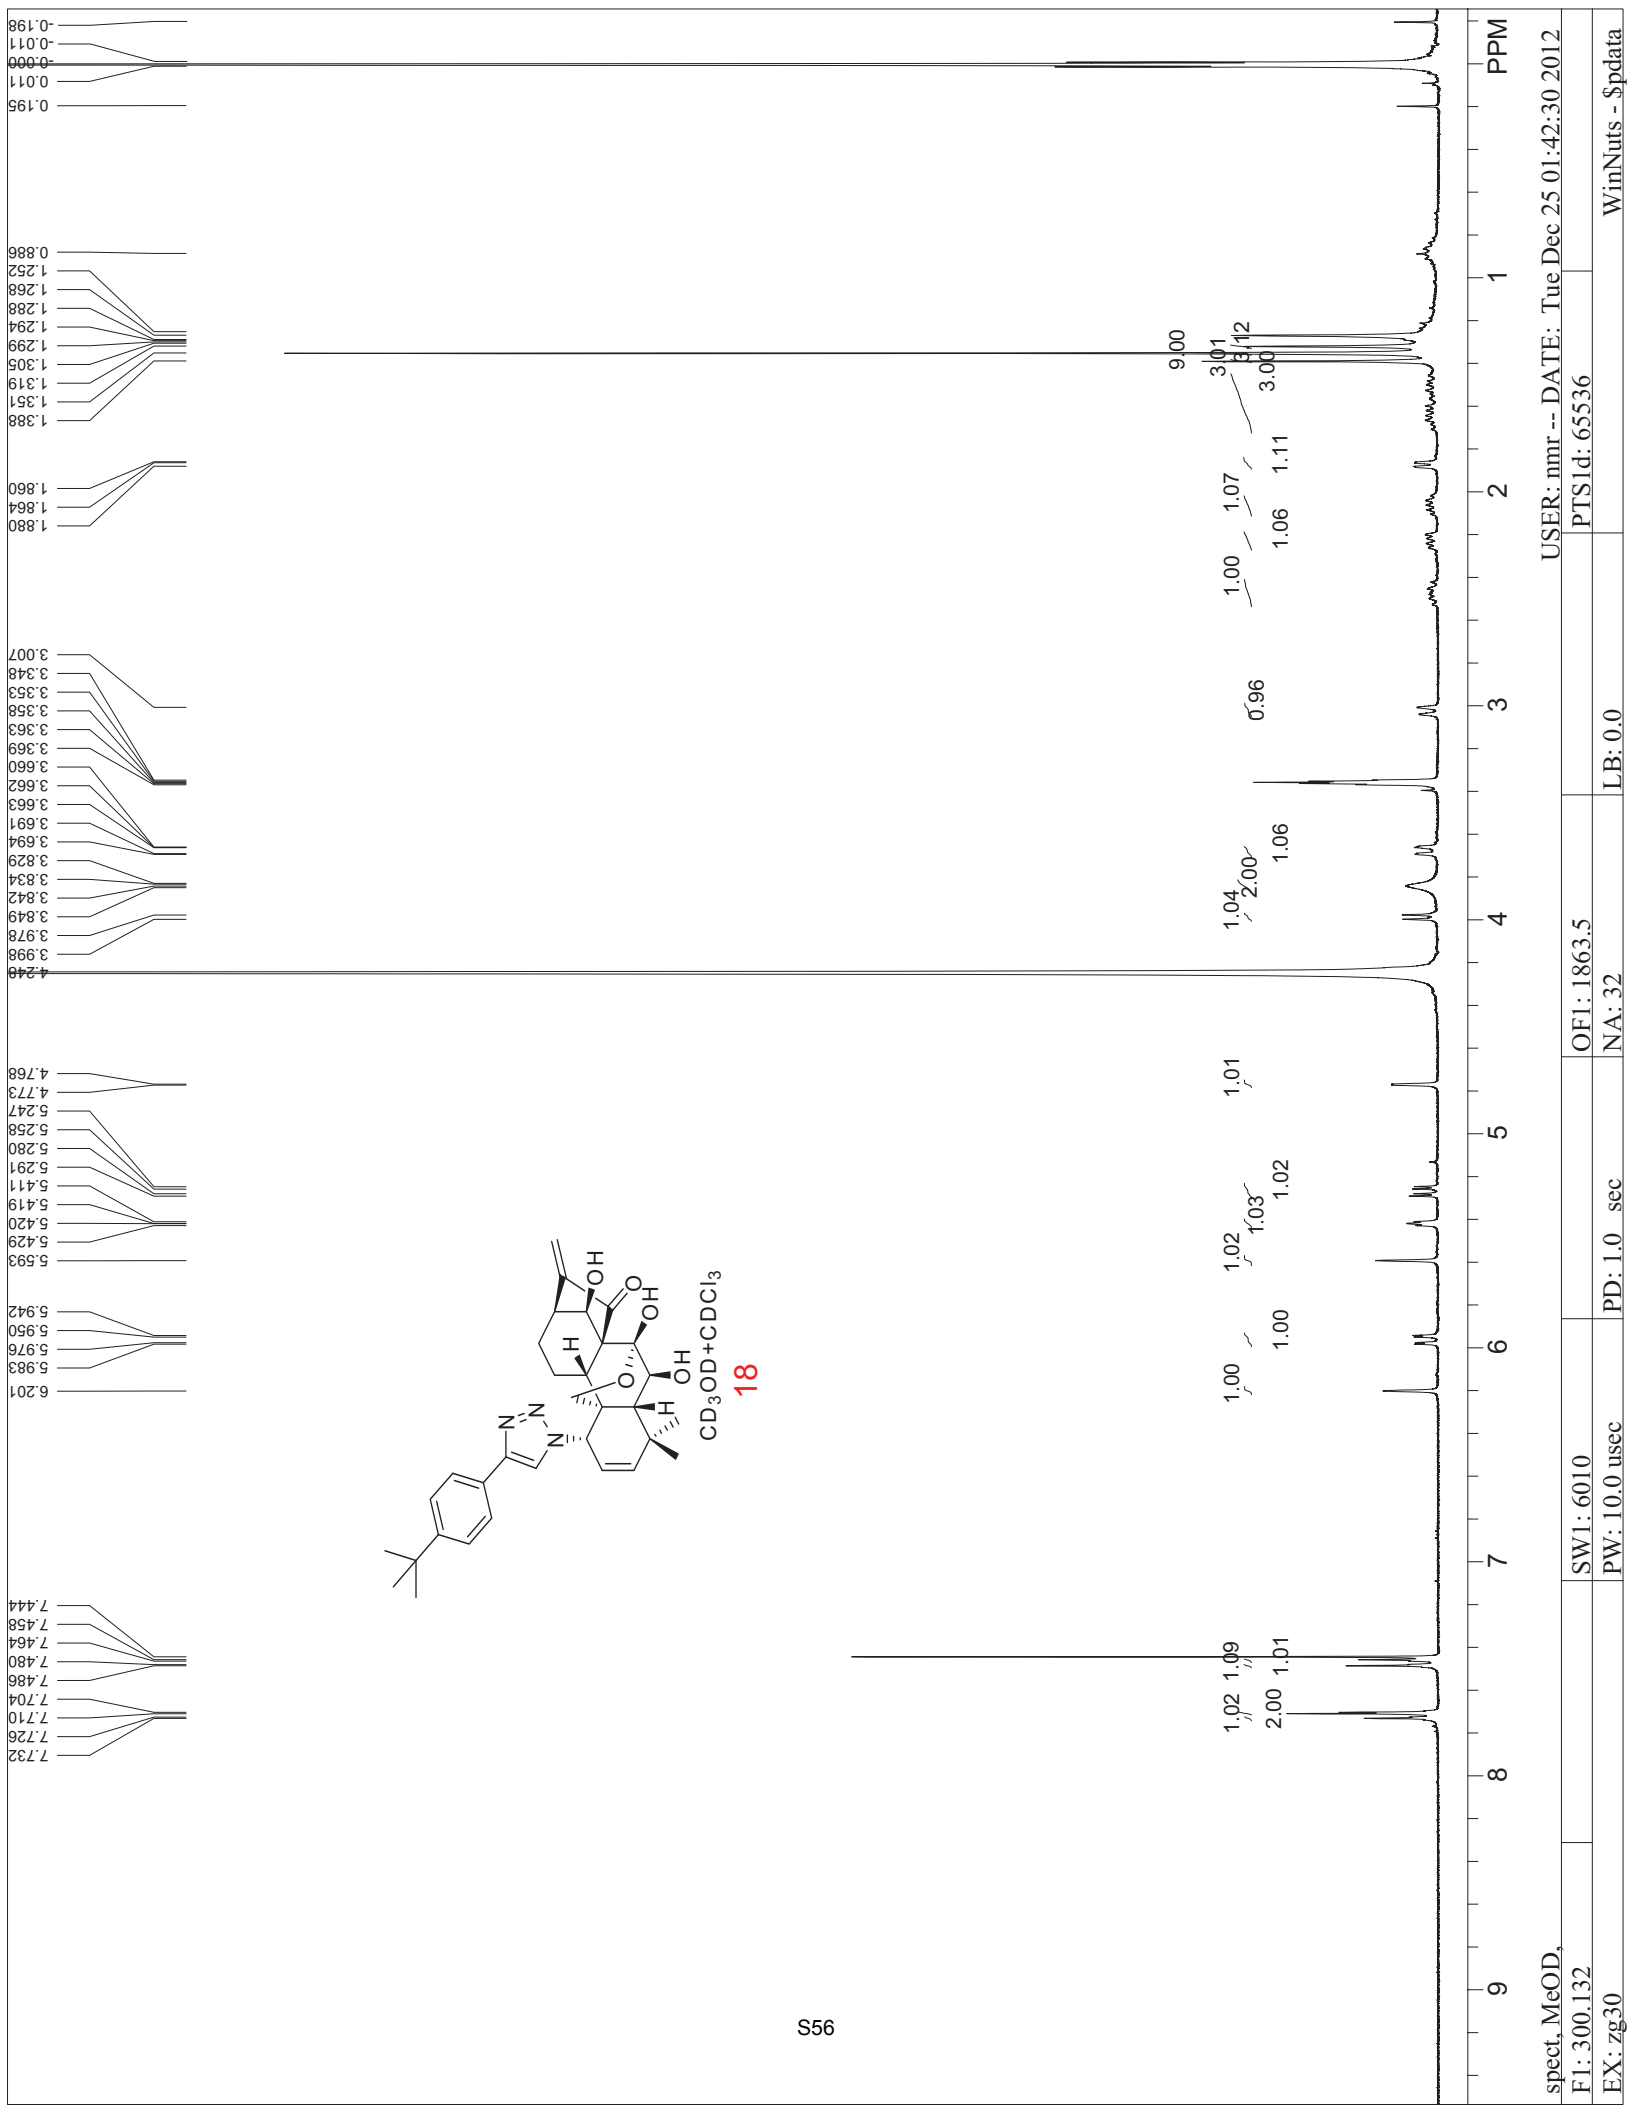

spect, MeOD, USER: nmr -- DATE: Tue Dec 25 01:42:30 2012  
 F1: 300.132 OFI: 1863.5 PTSId: 65536  
 EX: zg30 PW: 10.0 usec PD: 1.0 sec LB: 0.0 WinNuts - \$pdata



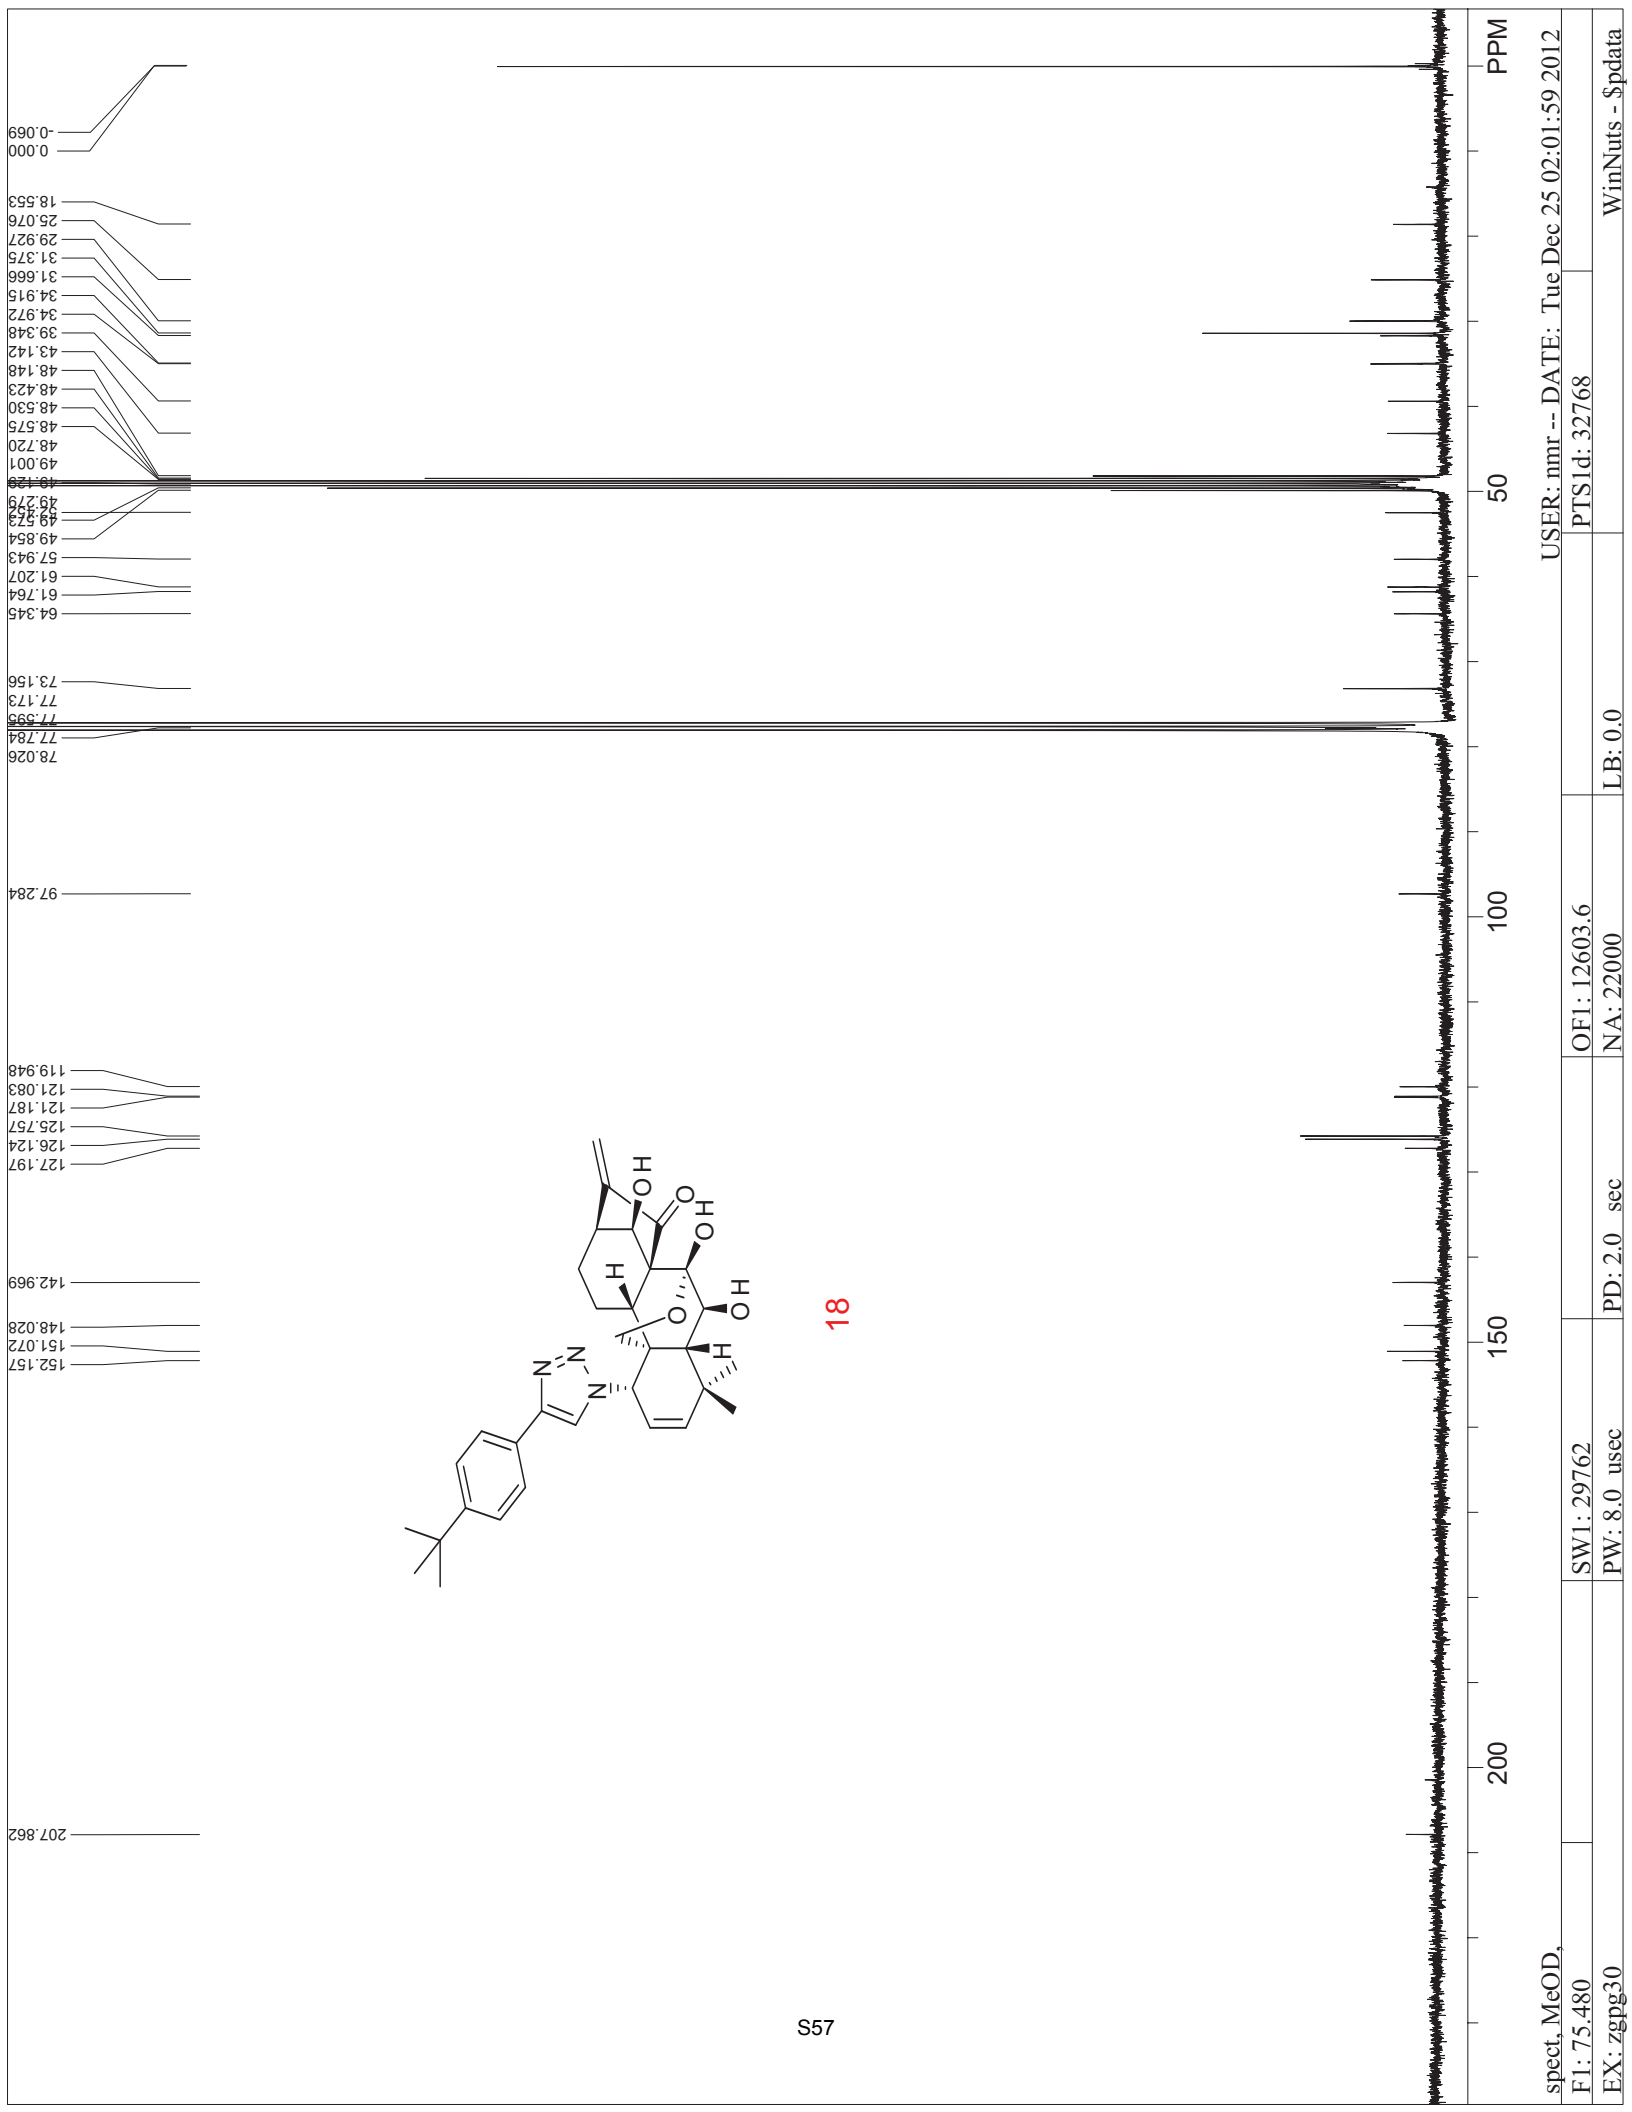

spect, MeOD, USER: nmr -- DATE: Tue Dec 25 02:01:59 2012  
 F1: 75.480 PTS1d: 32768  
 EX: zgpg30 WinNuts - \$pdata  
 OF1: 12603.6 LB: 0.0  
 NA: 22000  
 PD: 2.0 sec  
 SW1: 29762  
 PW: 8.0 usec

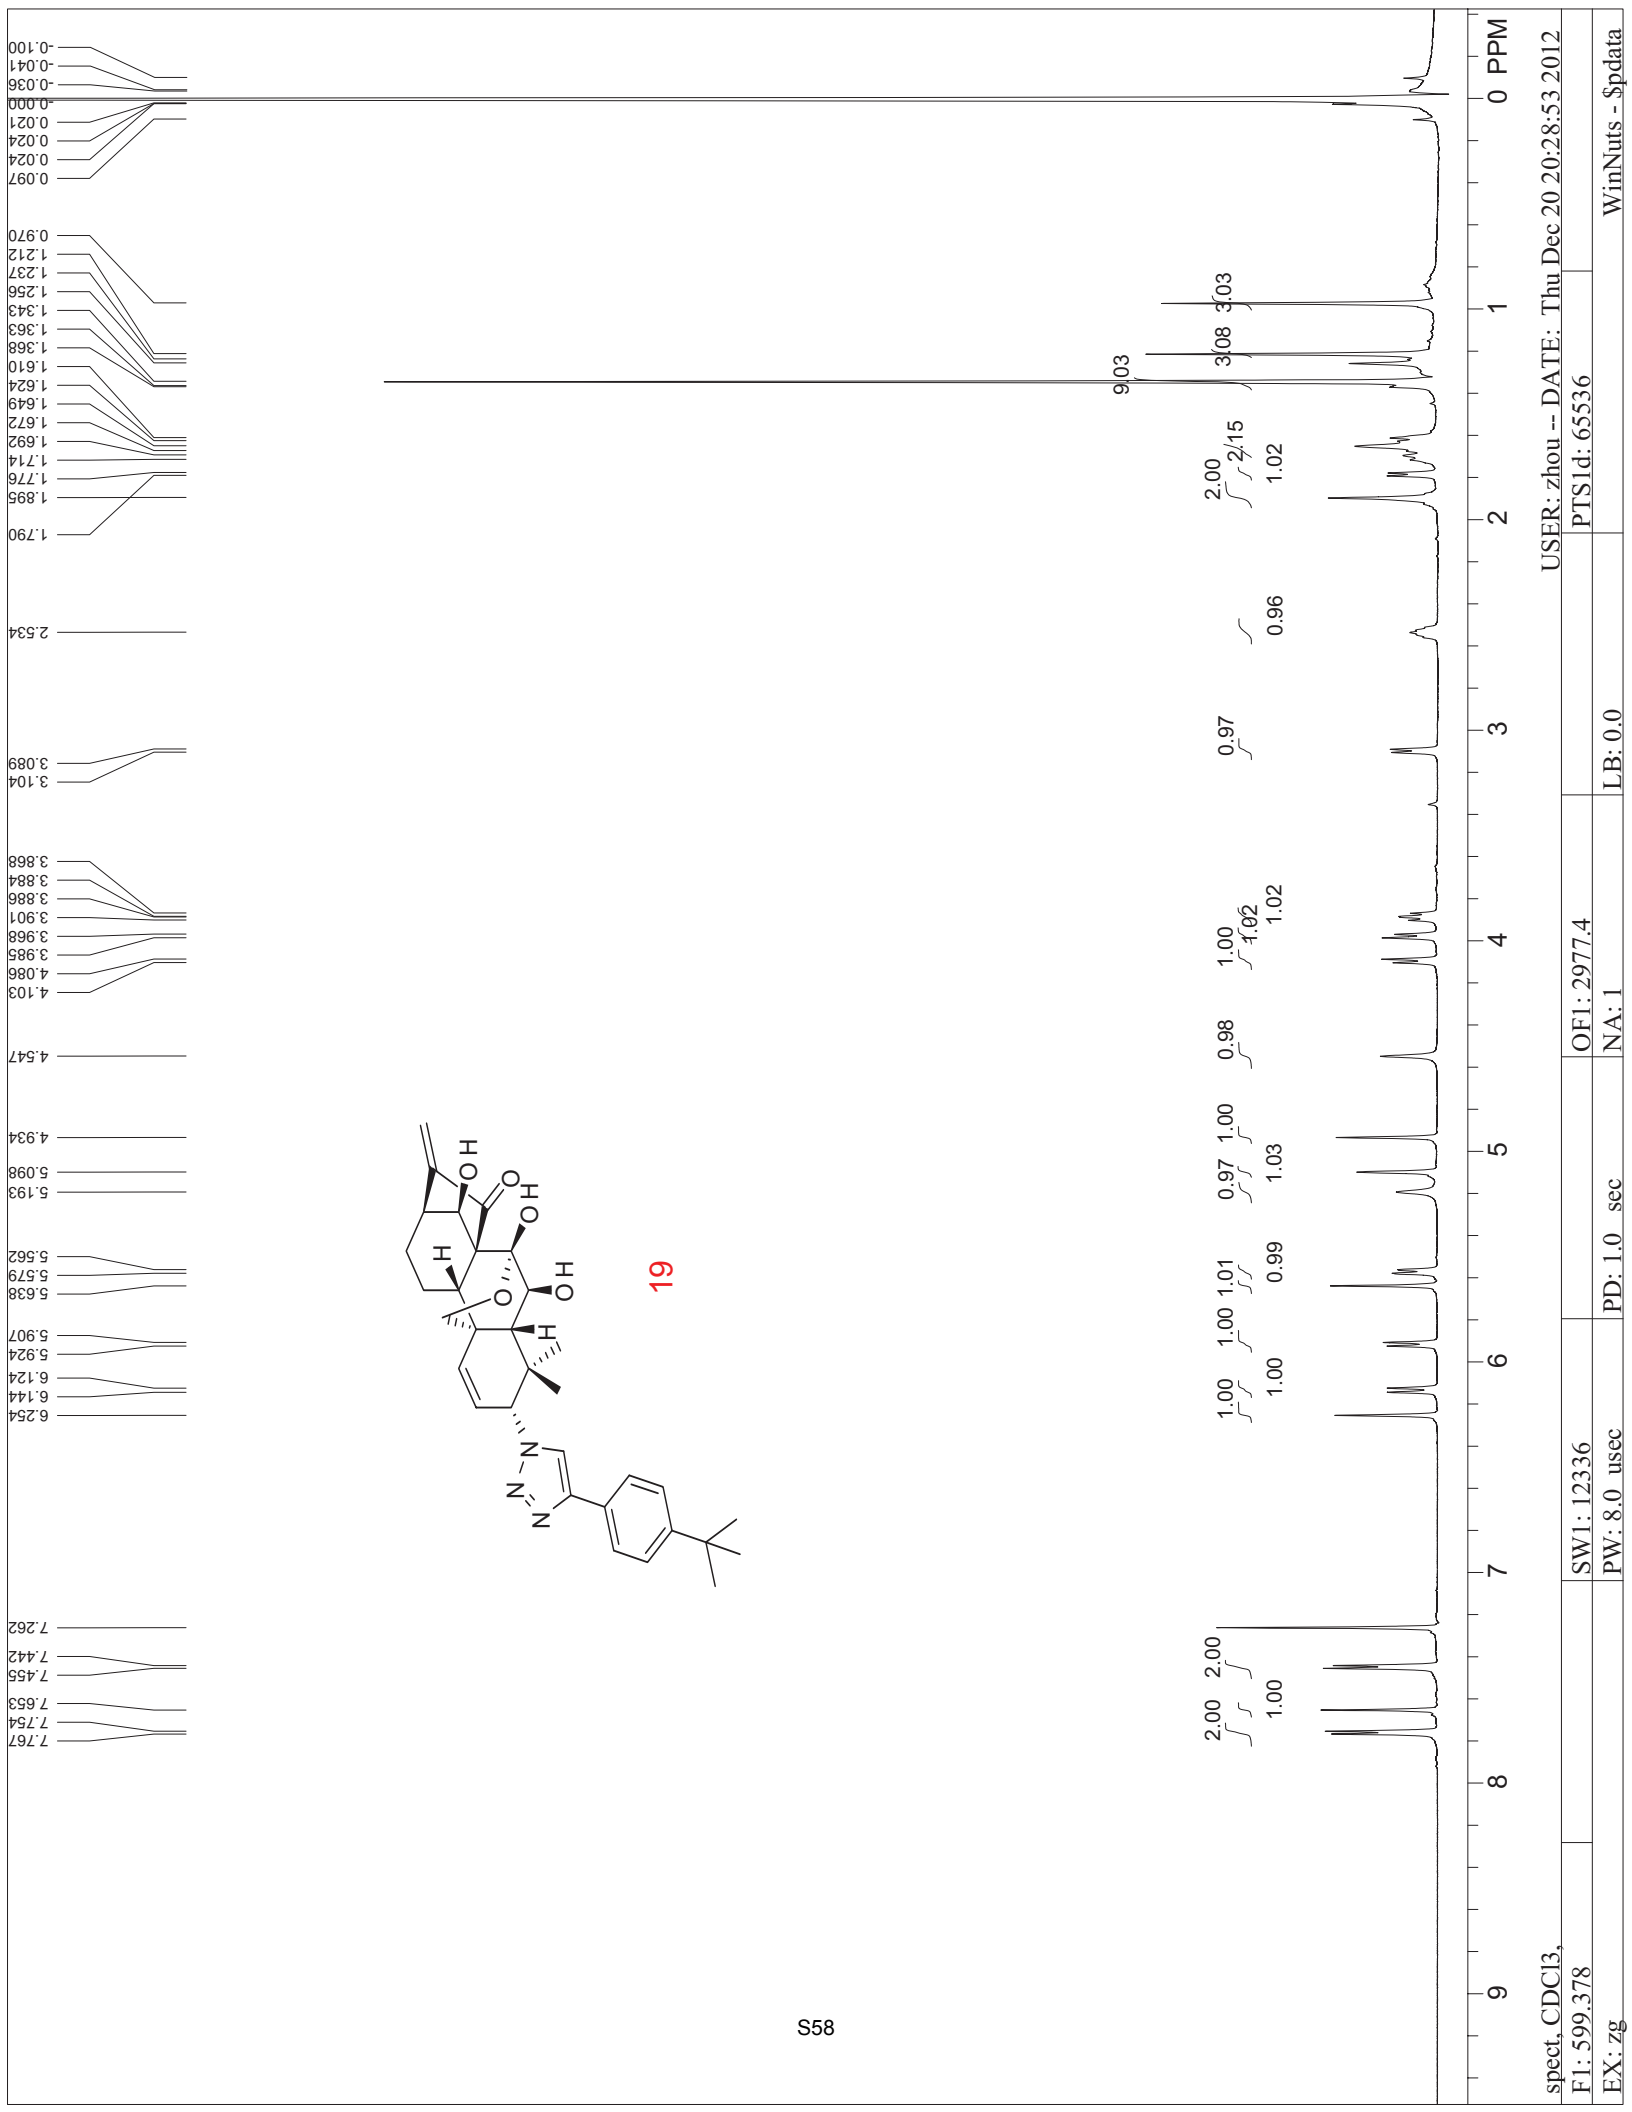

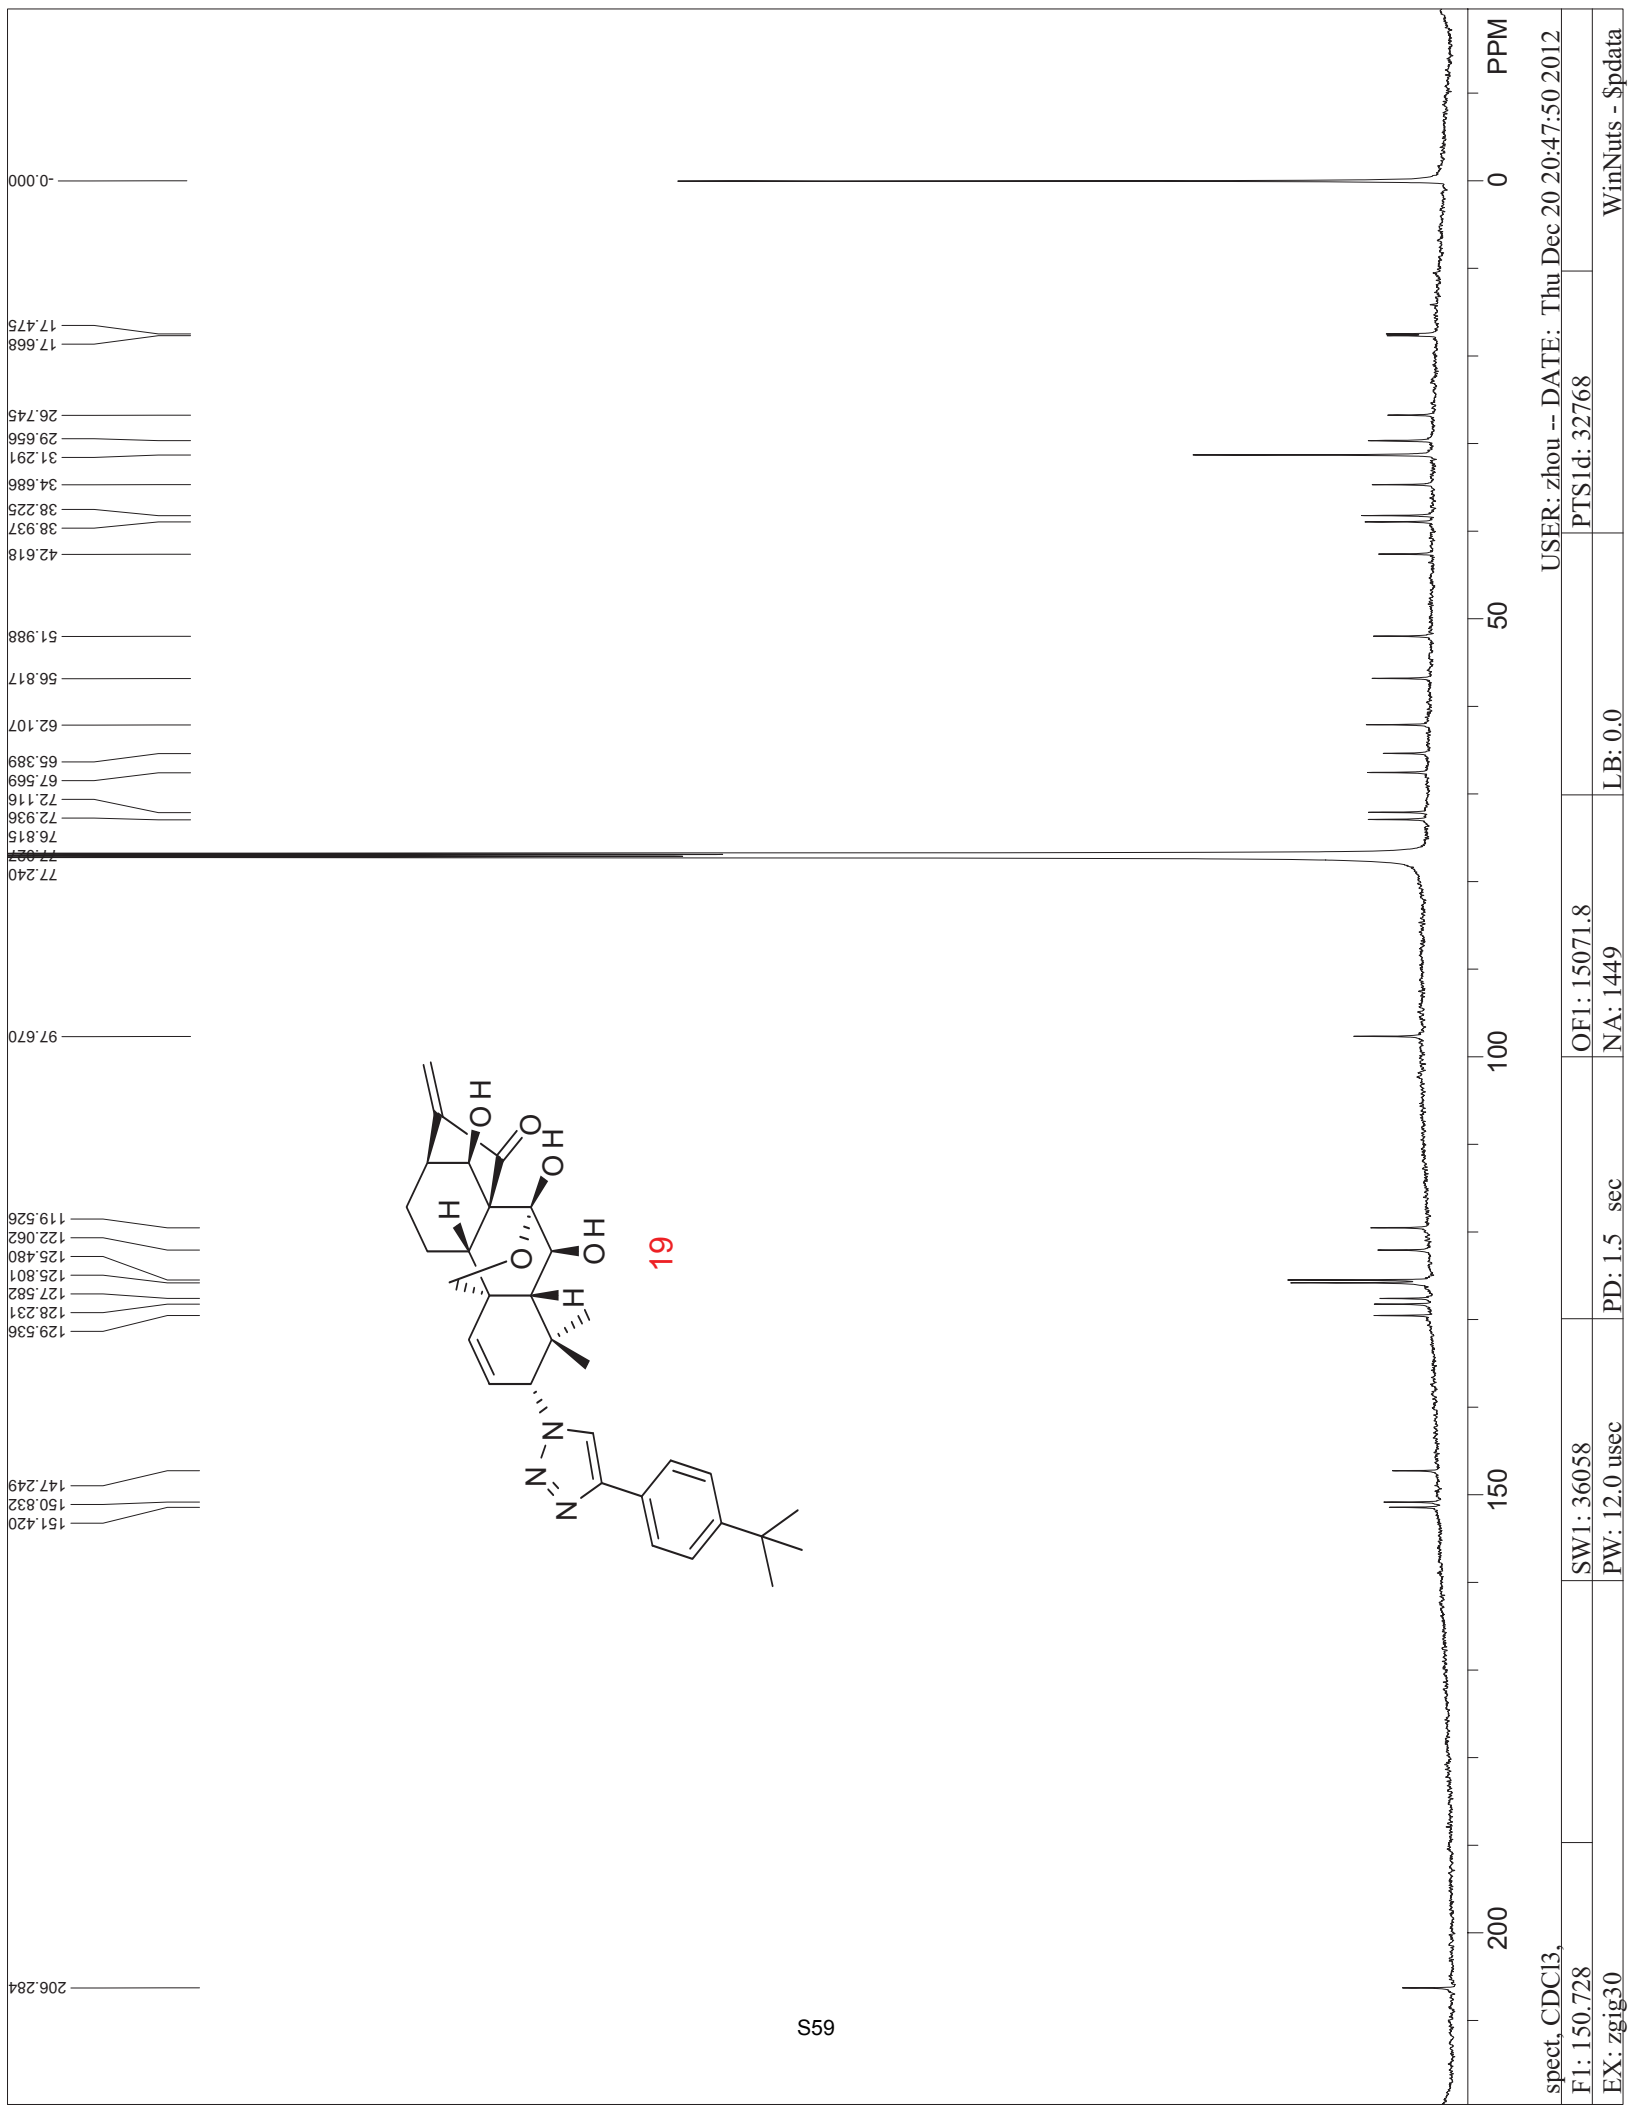

spect, CDCI3, USER: zhou -- DATE: Thu Dec 20 20:47:50 2012  
 F1: 150.728 OF1: 15071.8 PTS1d: 32768  
 EX: zgig30 PD: 1.5 sec LB: 0.0 WinNuts - \$pdata

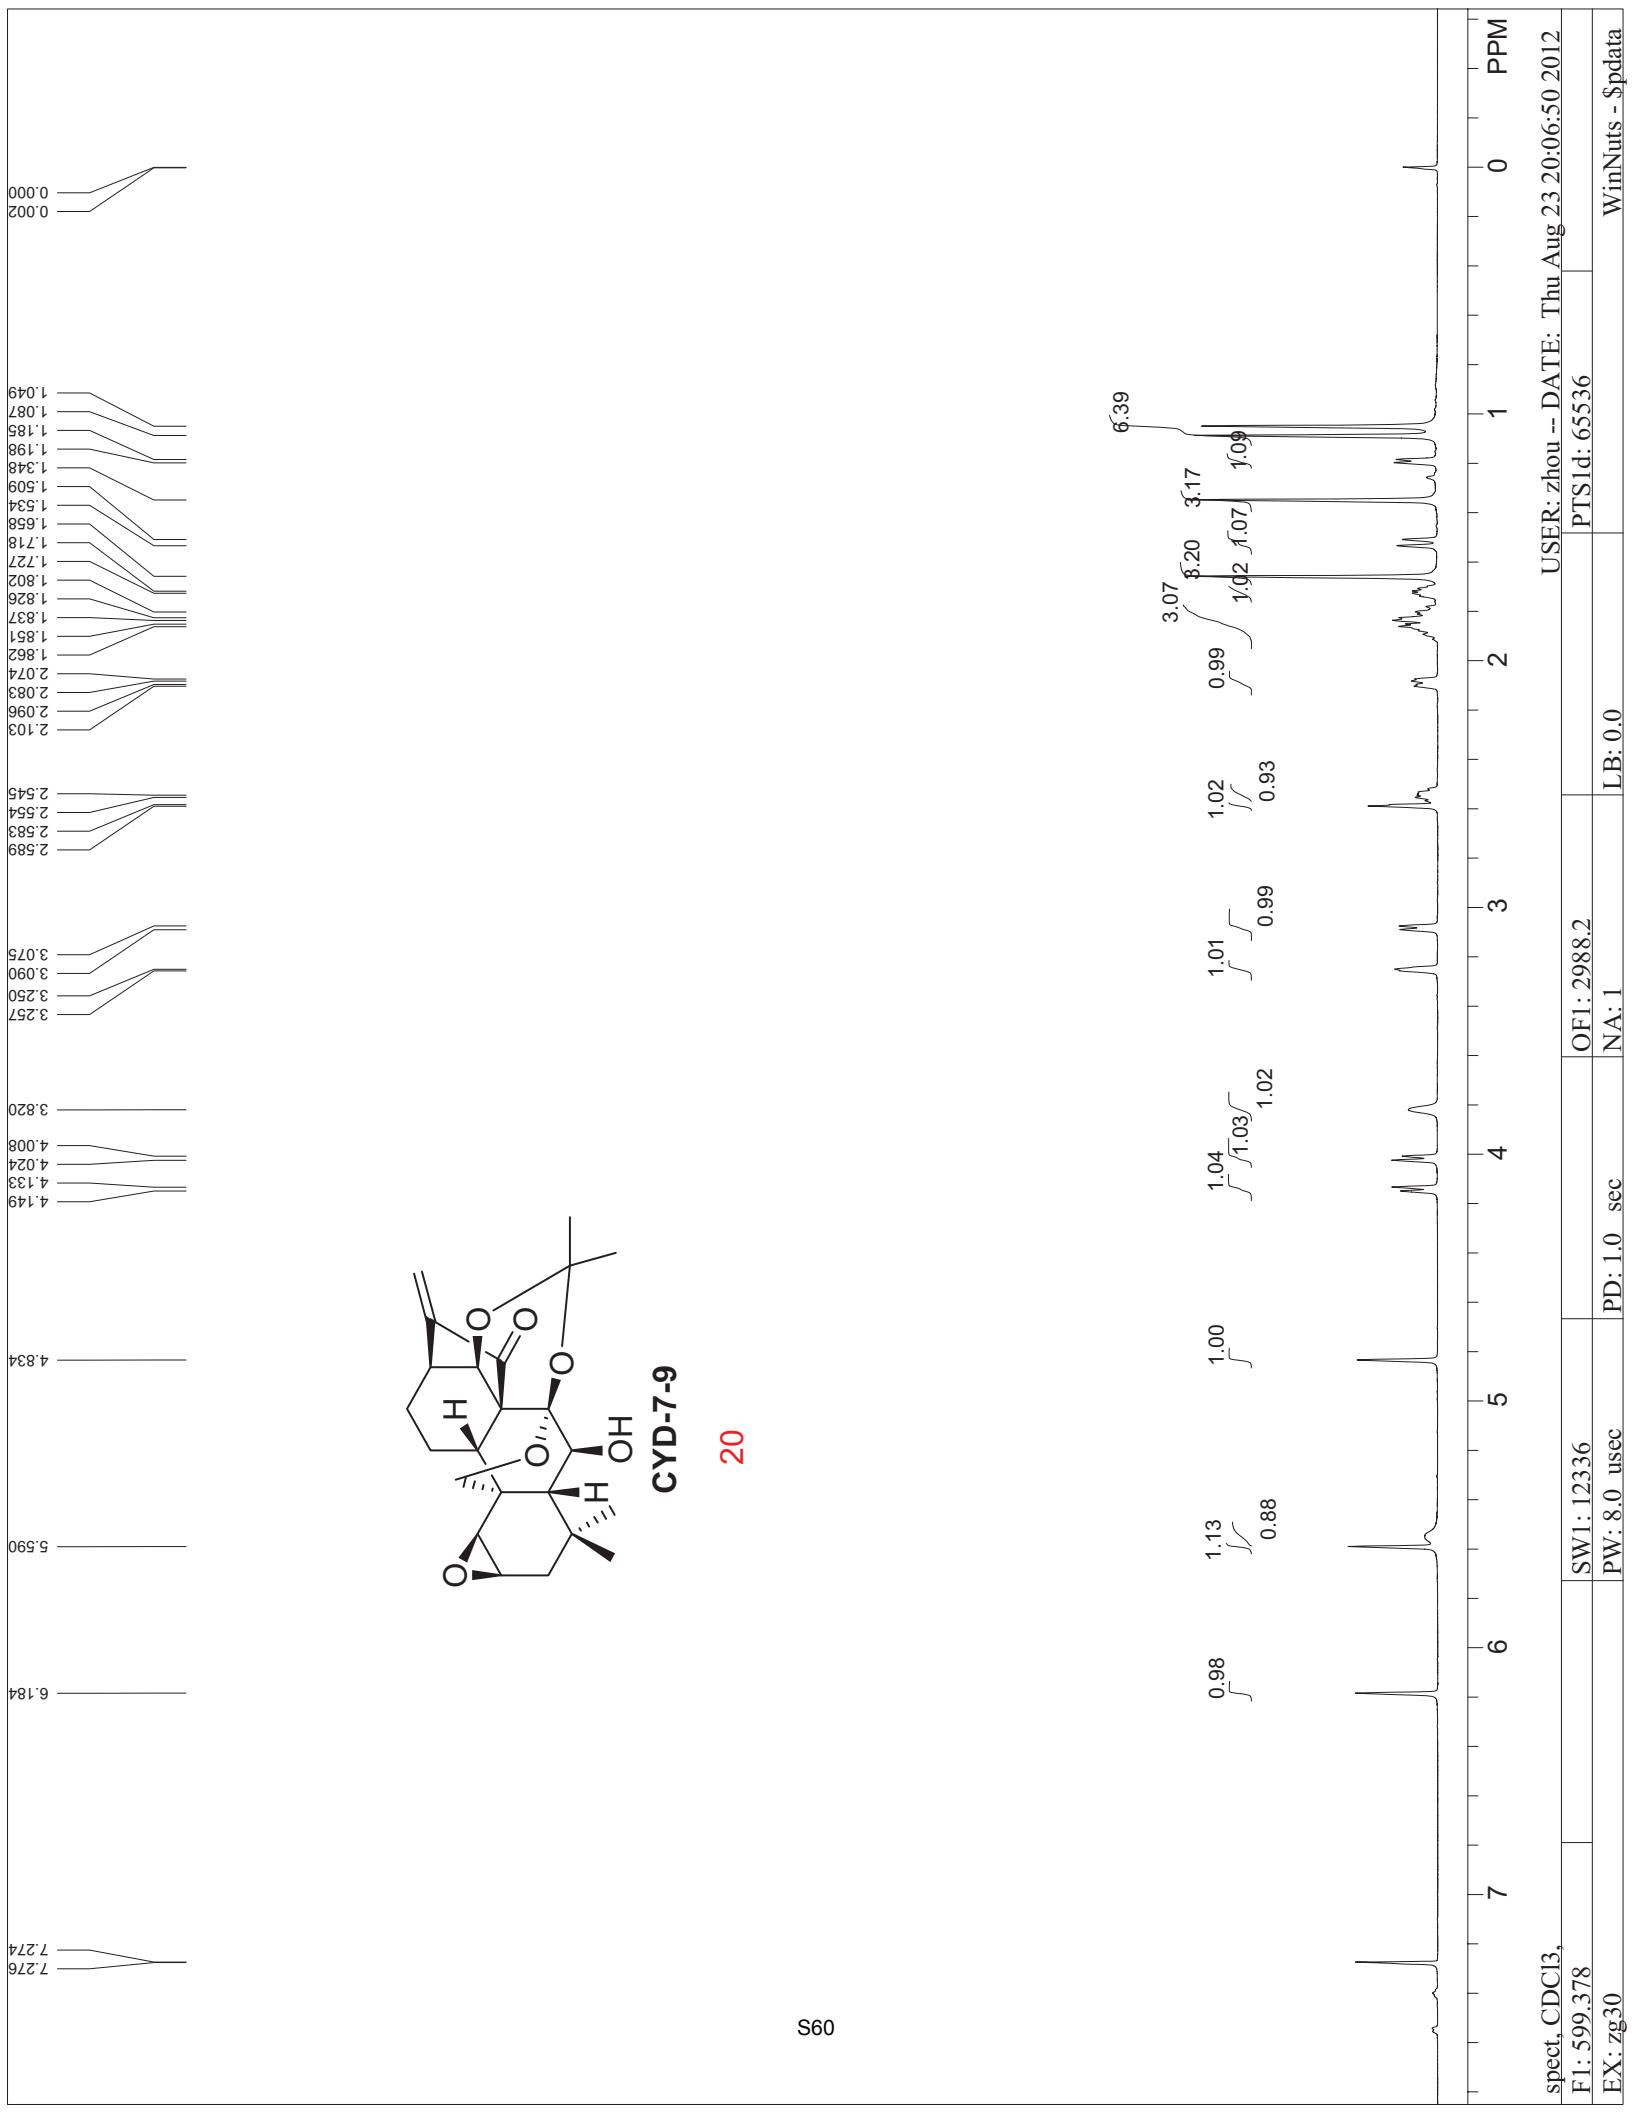

spect, CDC13, USER: zhou -- DATE: Thu Aug 23 20:06:50 2012  
 F1: 599.378 SW1: 12336 OF1: 2988.2 PTS1d: 65536  
 EX: zg30 PW: 8.0 usec PD: 1.0 sec NA: 1 LB: 0.0 WinNuts - \$pdata

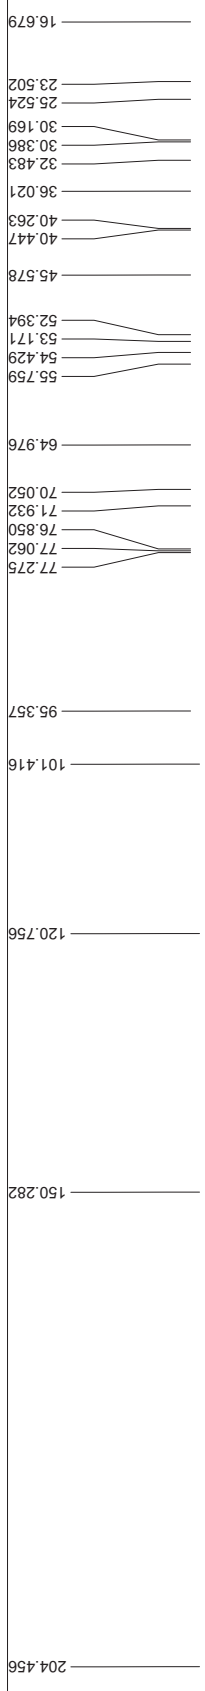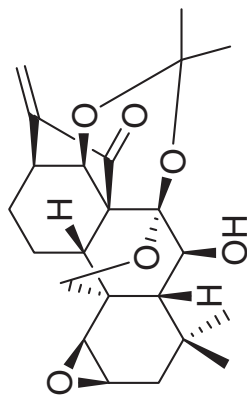

**CYD-7-9**

20

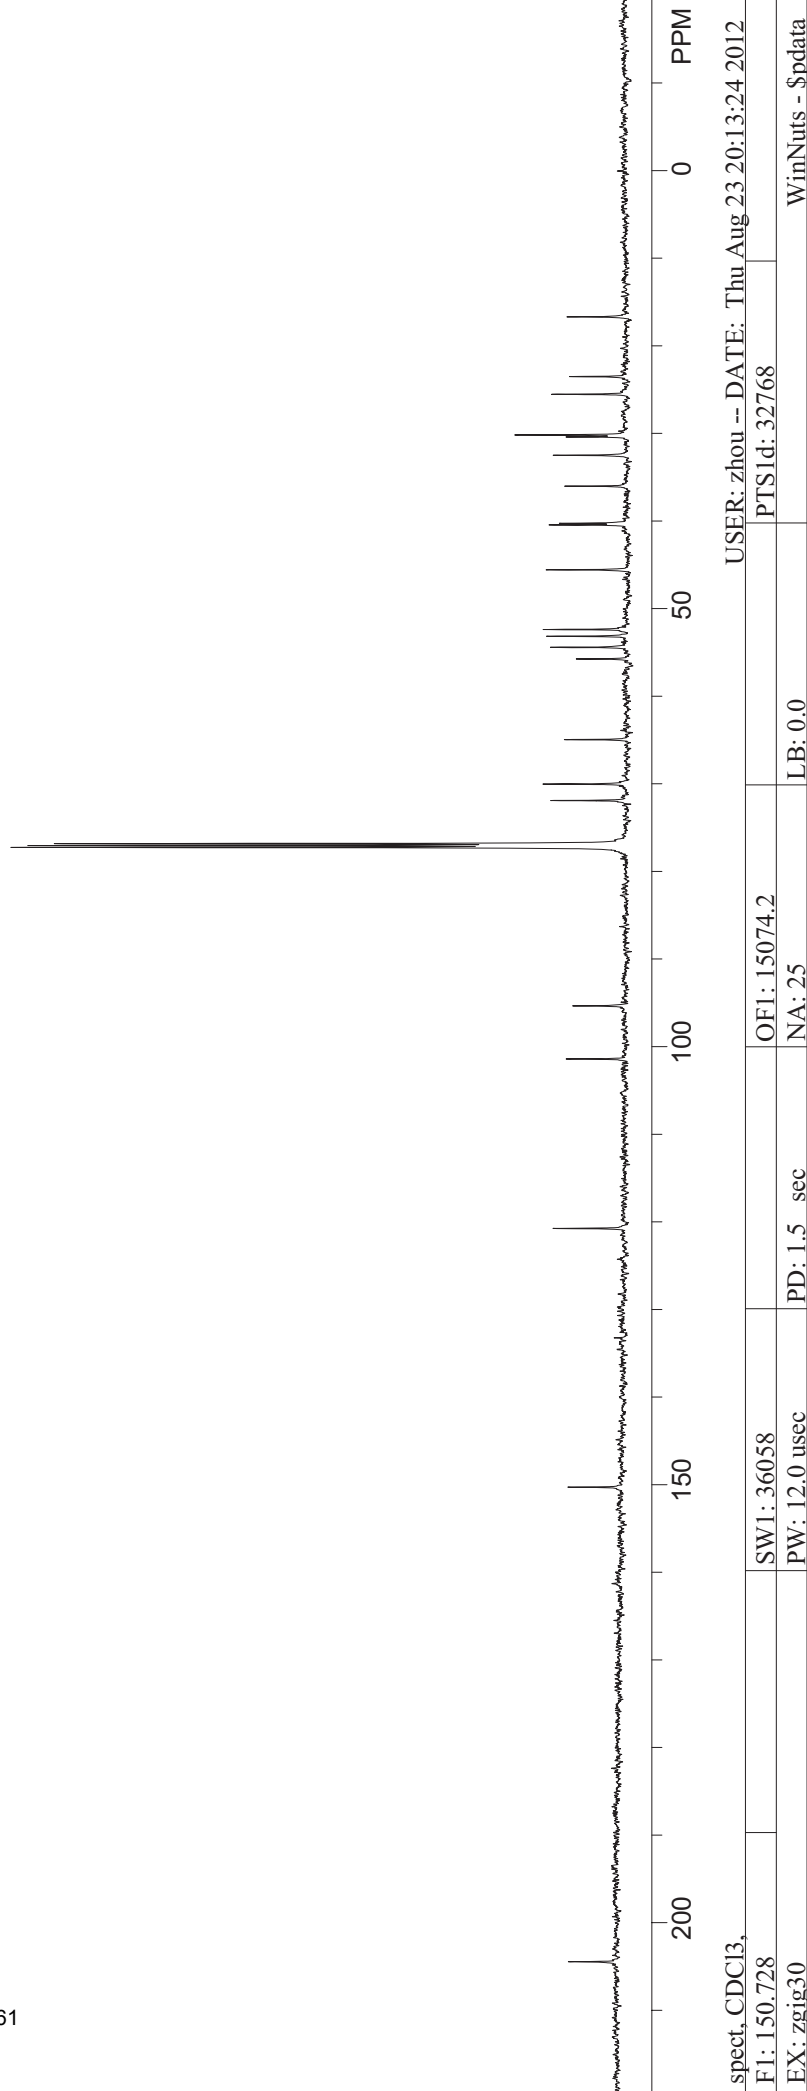

|               |                                              |
|---------------|----------------------------------------------|
| spect, CDCI3, | USER: zhou -- DATE: Thu Aug 23 20:13:24 2012 |
| F1: 150.728   | PTSId: 32768                                 |
| EX: zig30     | LB: 0.0                                      |
| SW1: 36058    | OF1: 15074.2                                 |
| PW: 12.0 usec | NA: 25                                       |
| PD: 1.5 sec   |                                              |
|               | WinNuts - \$pdata                            |

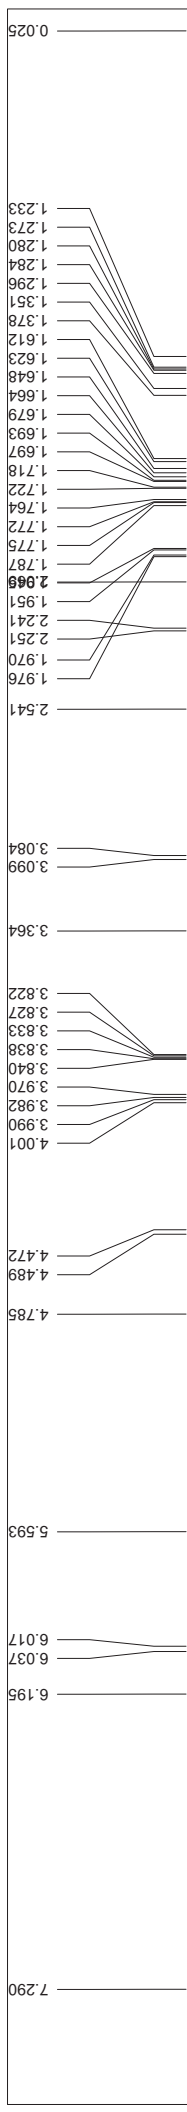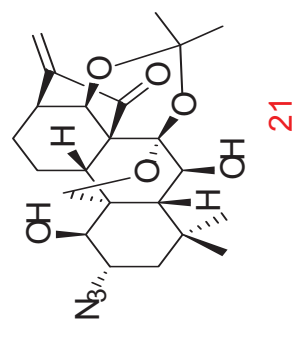

S62

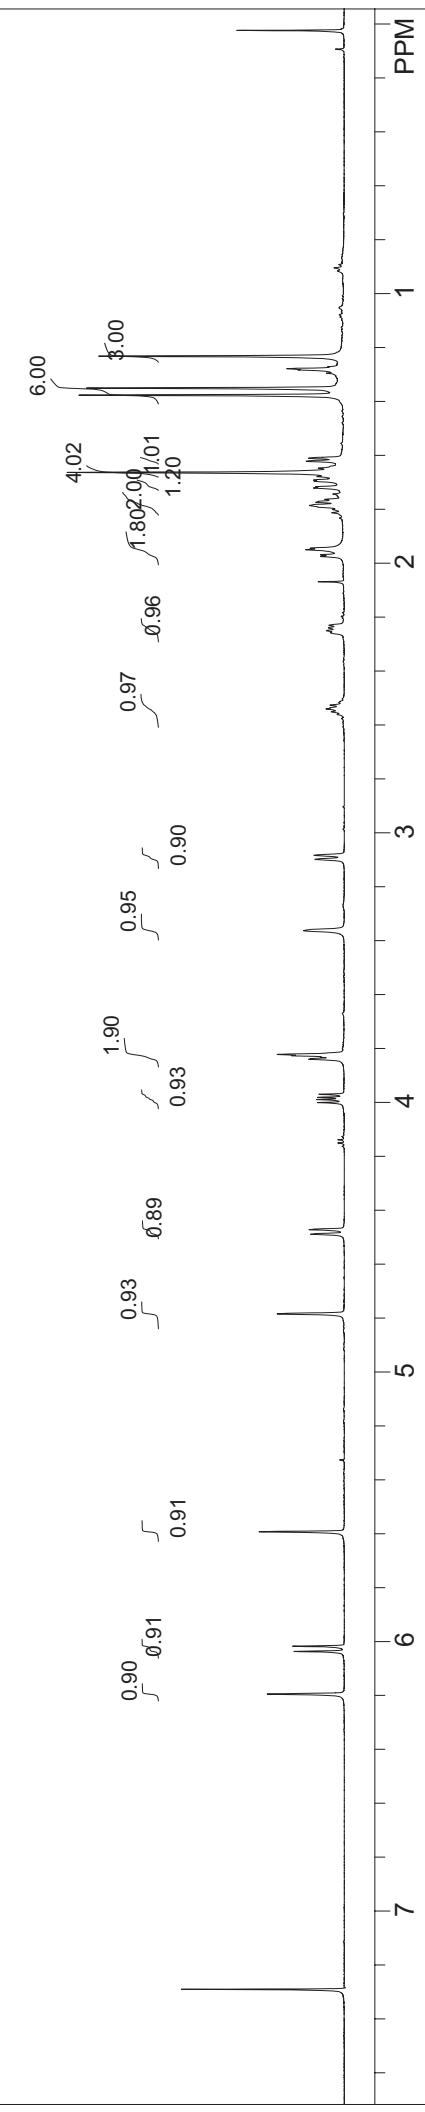

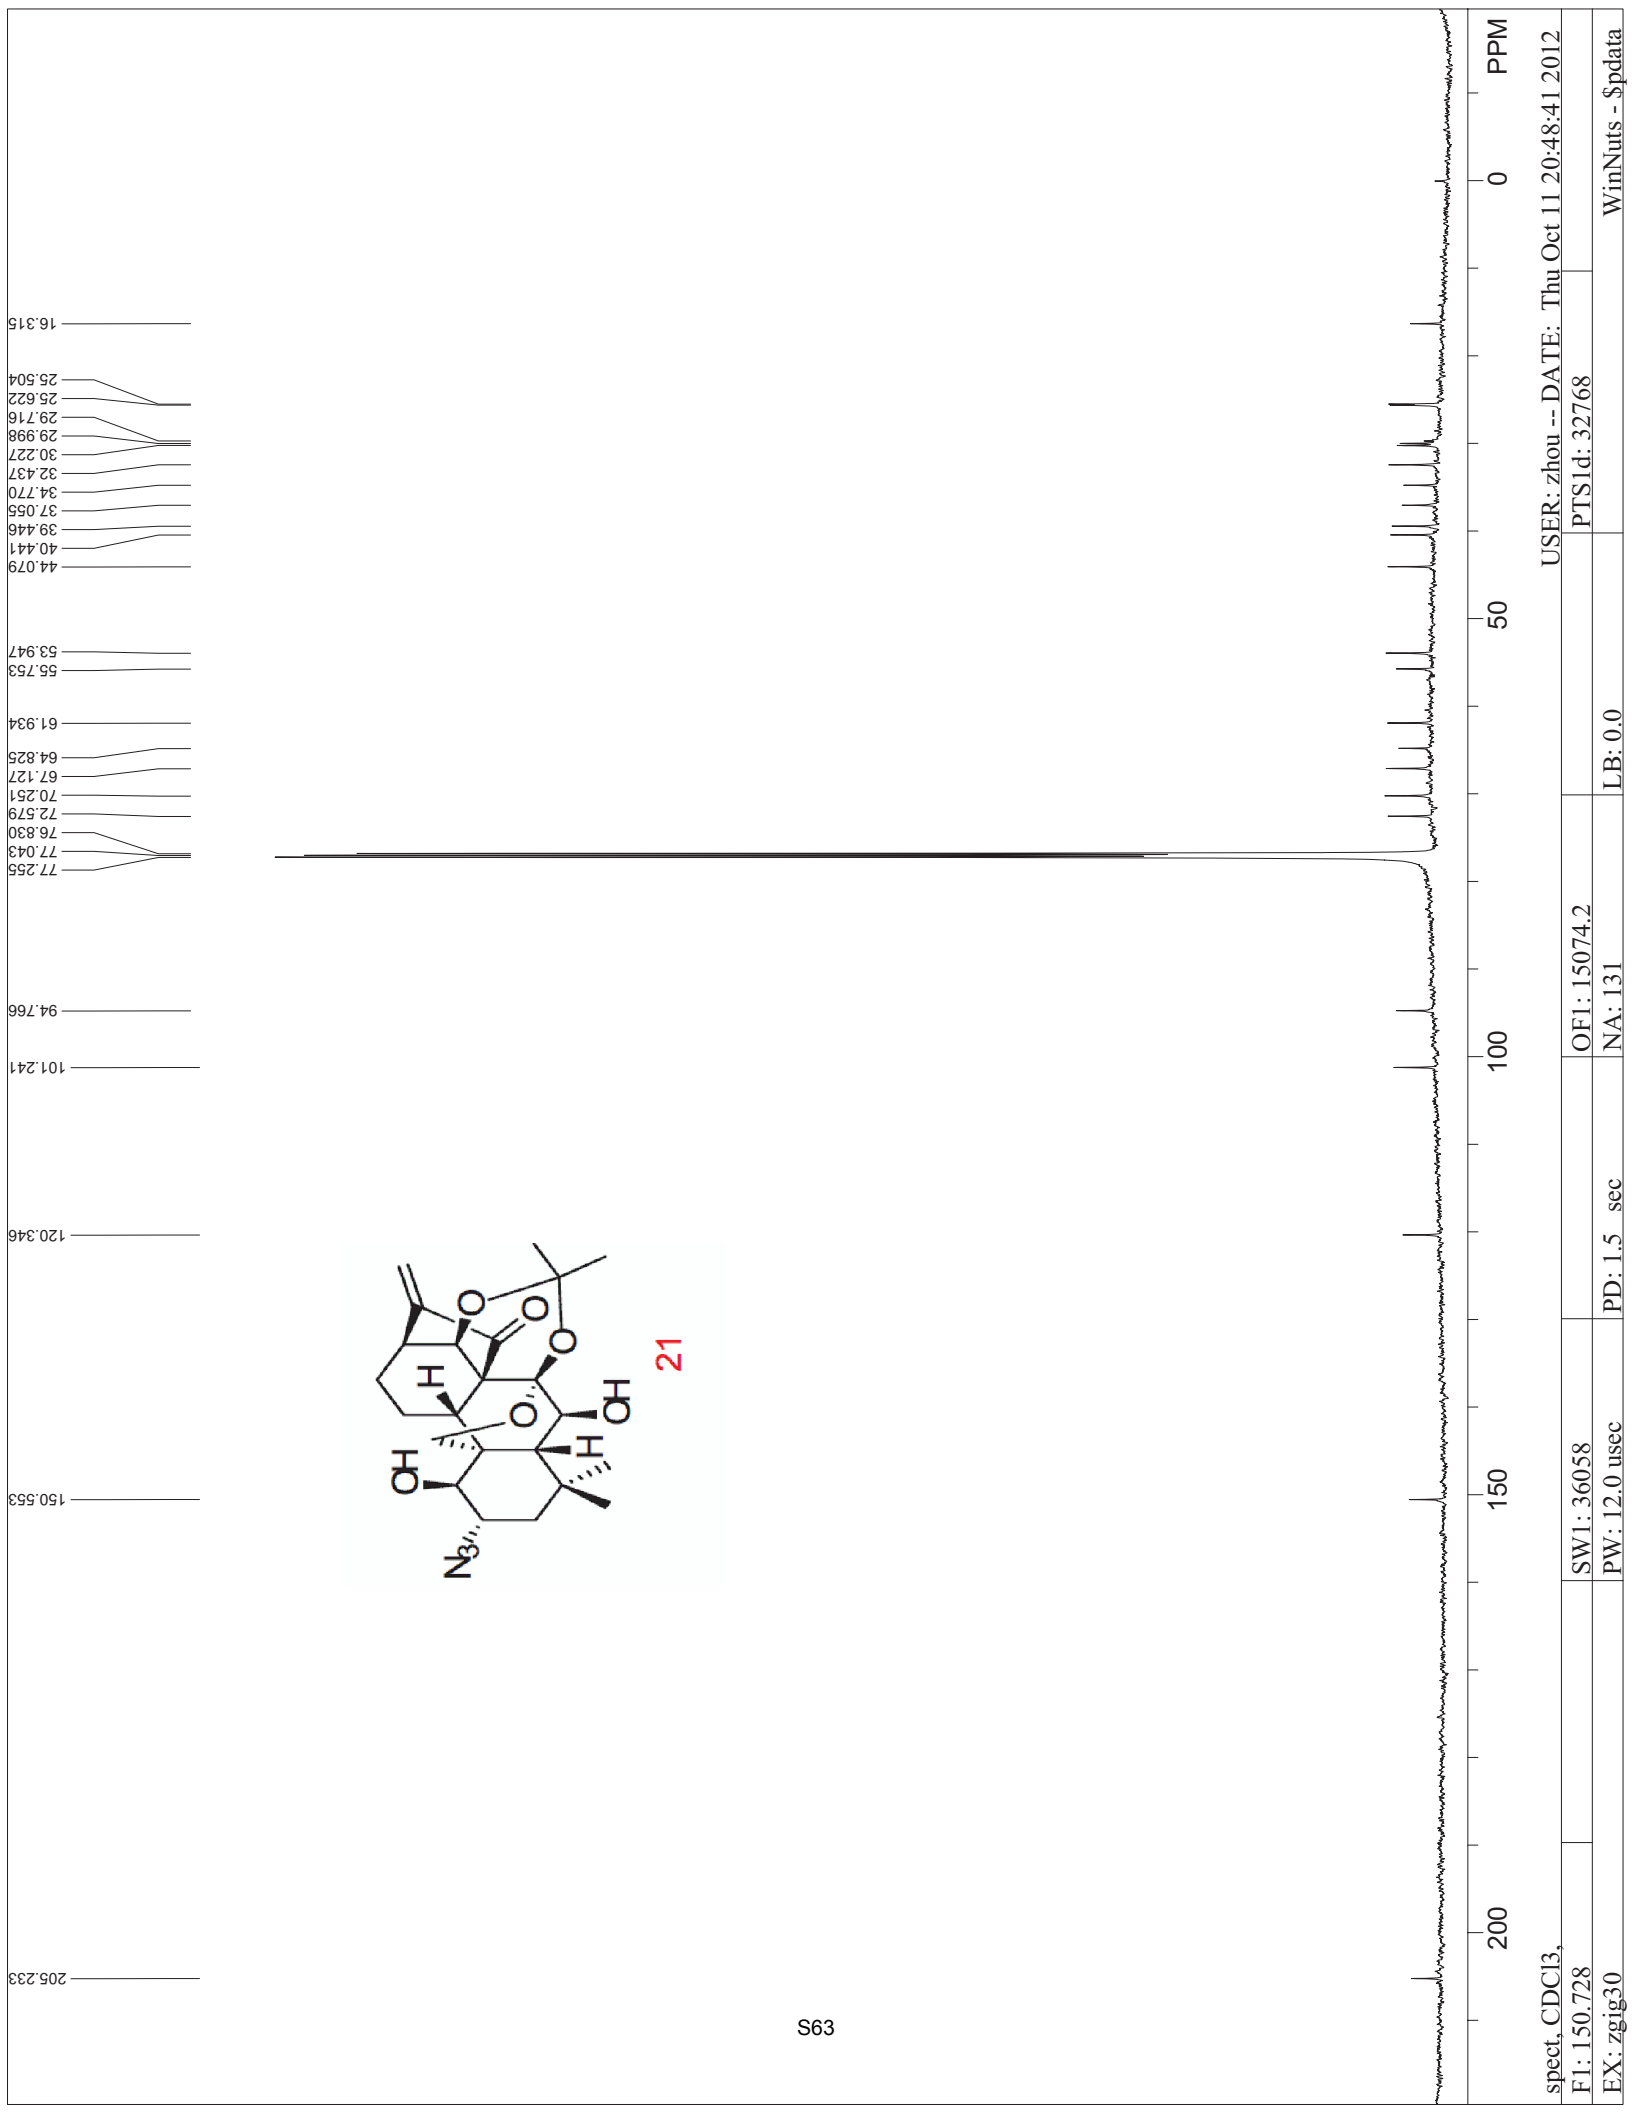

spect, CDCI3, USER: zhou -- DATE: Thu Oct 11 20:48:41 2012  
 F1: 150.728 OF1: 15074.2 PTS1d: 32768  
 EX: zgig30 PD: 1.5 sec NA: 131 LB: 0.0 WinNuts - \$pdata





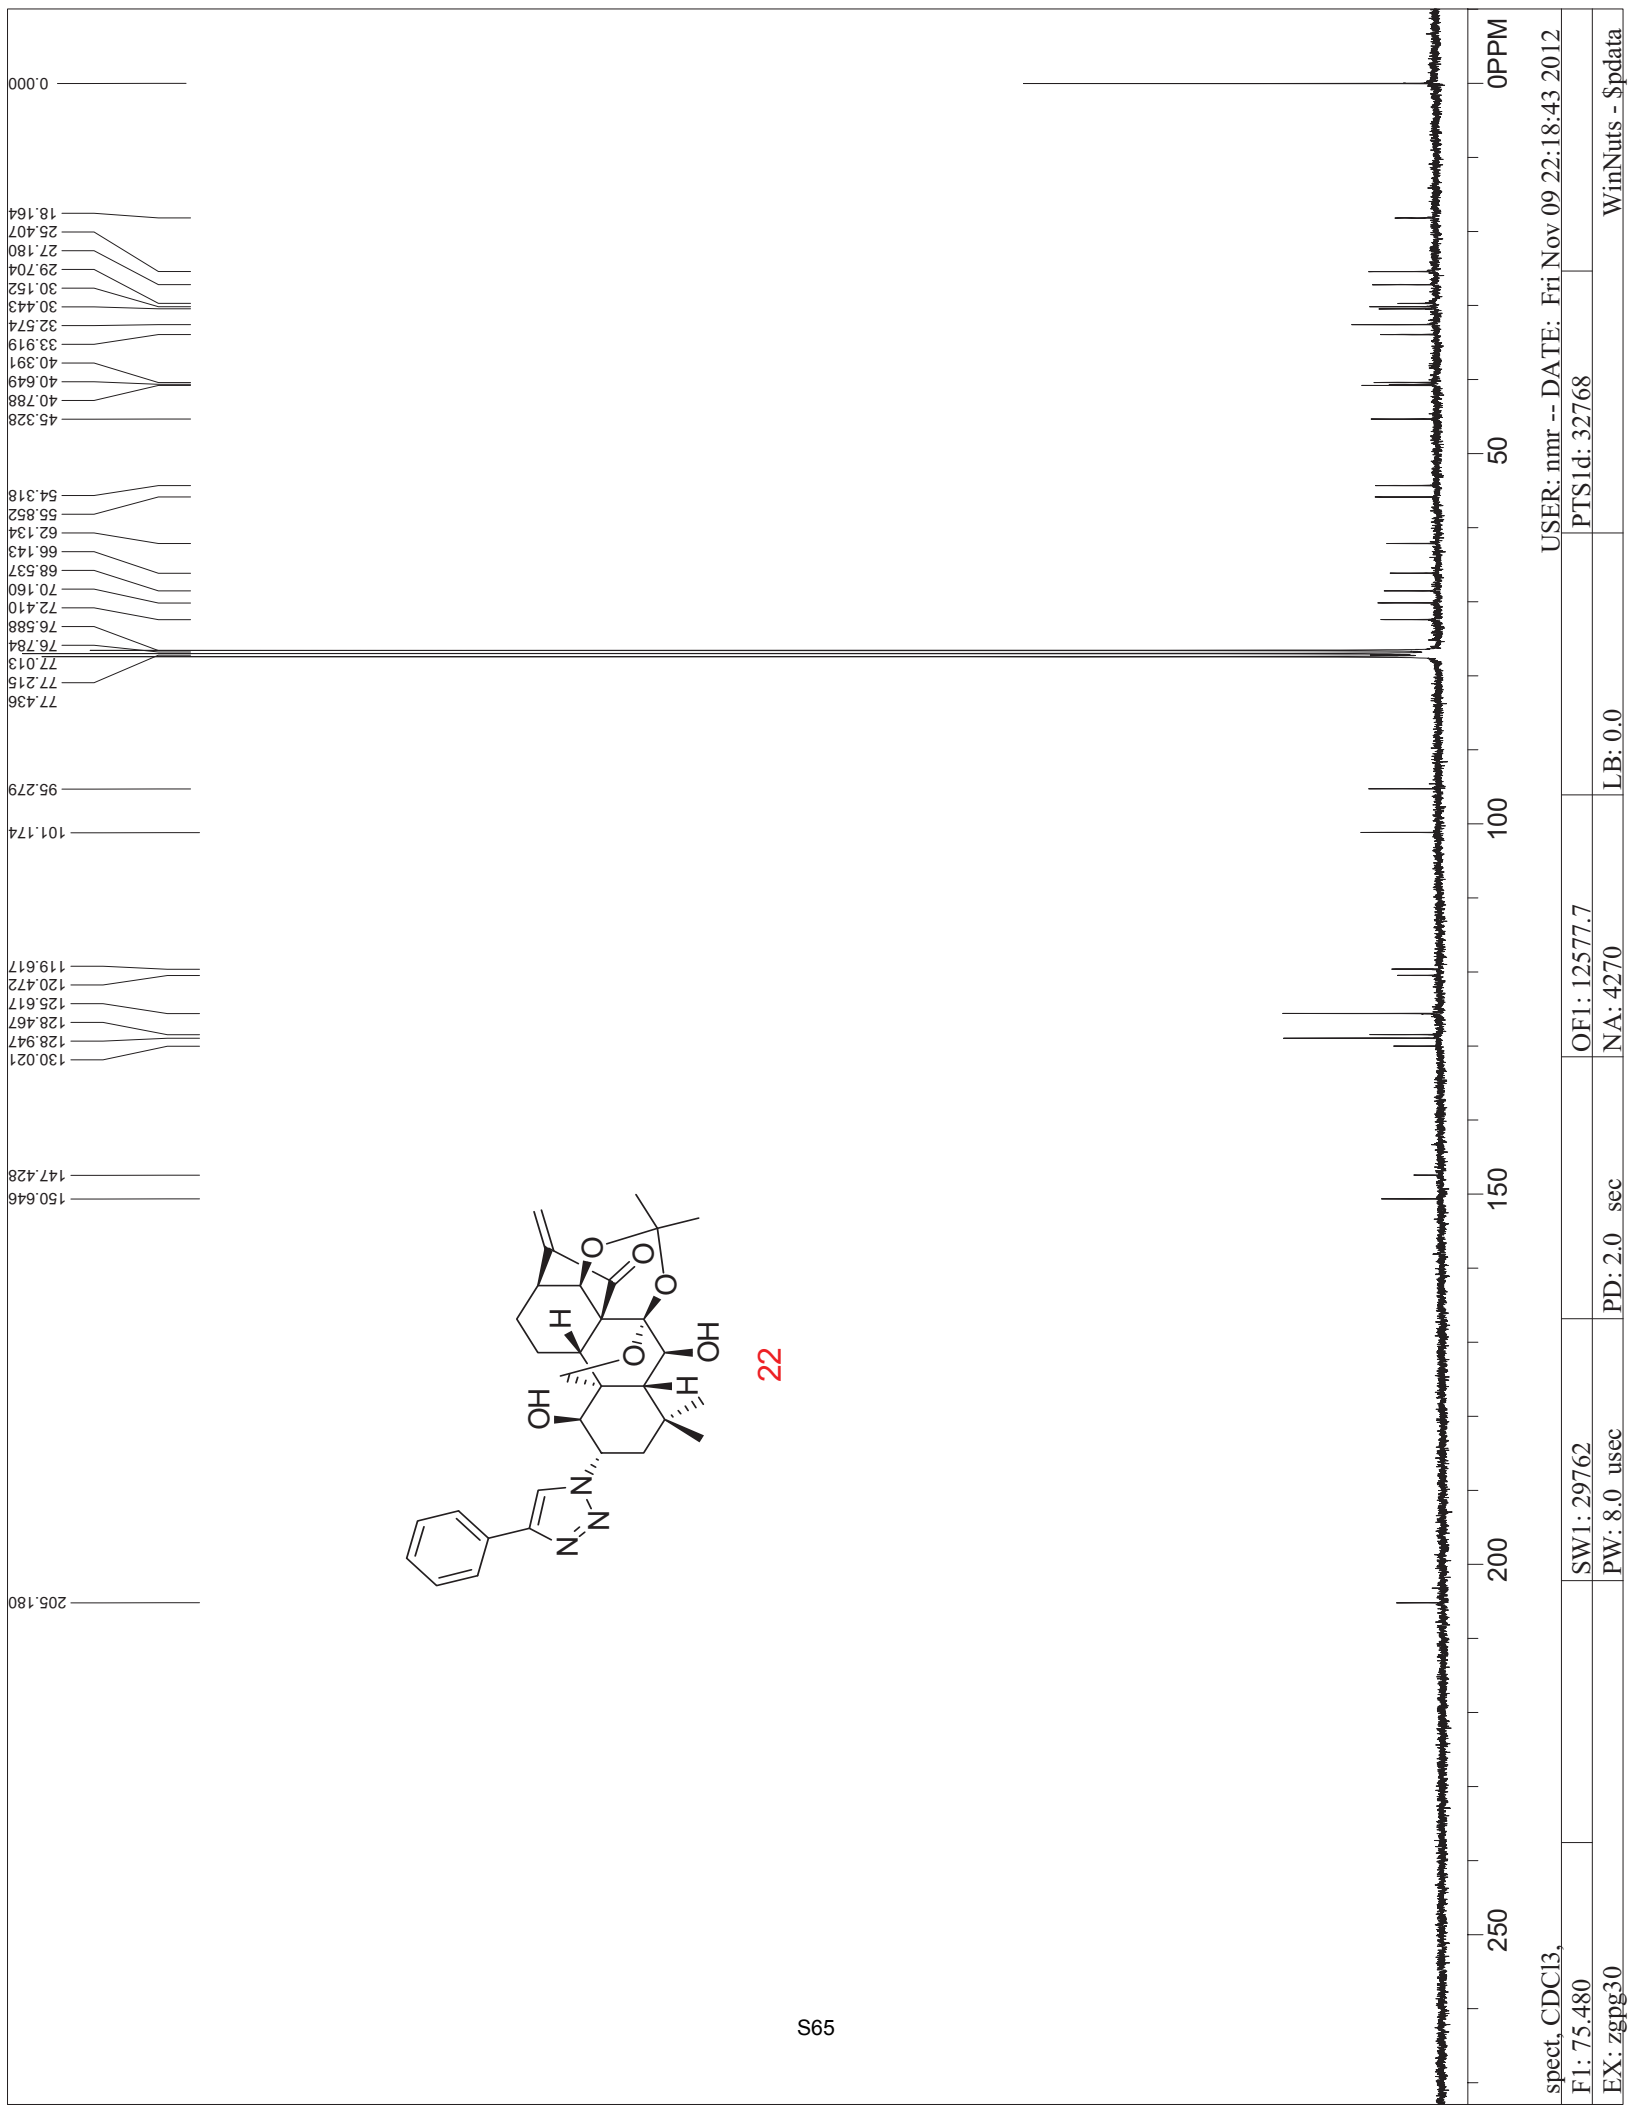

spect, CDCl3, USER: nmr -- DATE: Fri Nov 09 22:18:43 2012  
 F1: 75.480 SW1: 29762 OF1: 12577.7 PTS1d: 32768  
 EX: zgpg30 PW: 8.0 usec PD: 2.0 sec NA: 4270 LB: 0.0 WinNuts - \$pdata

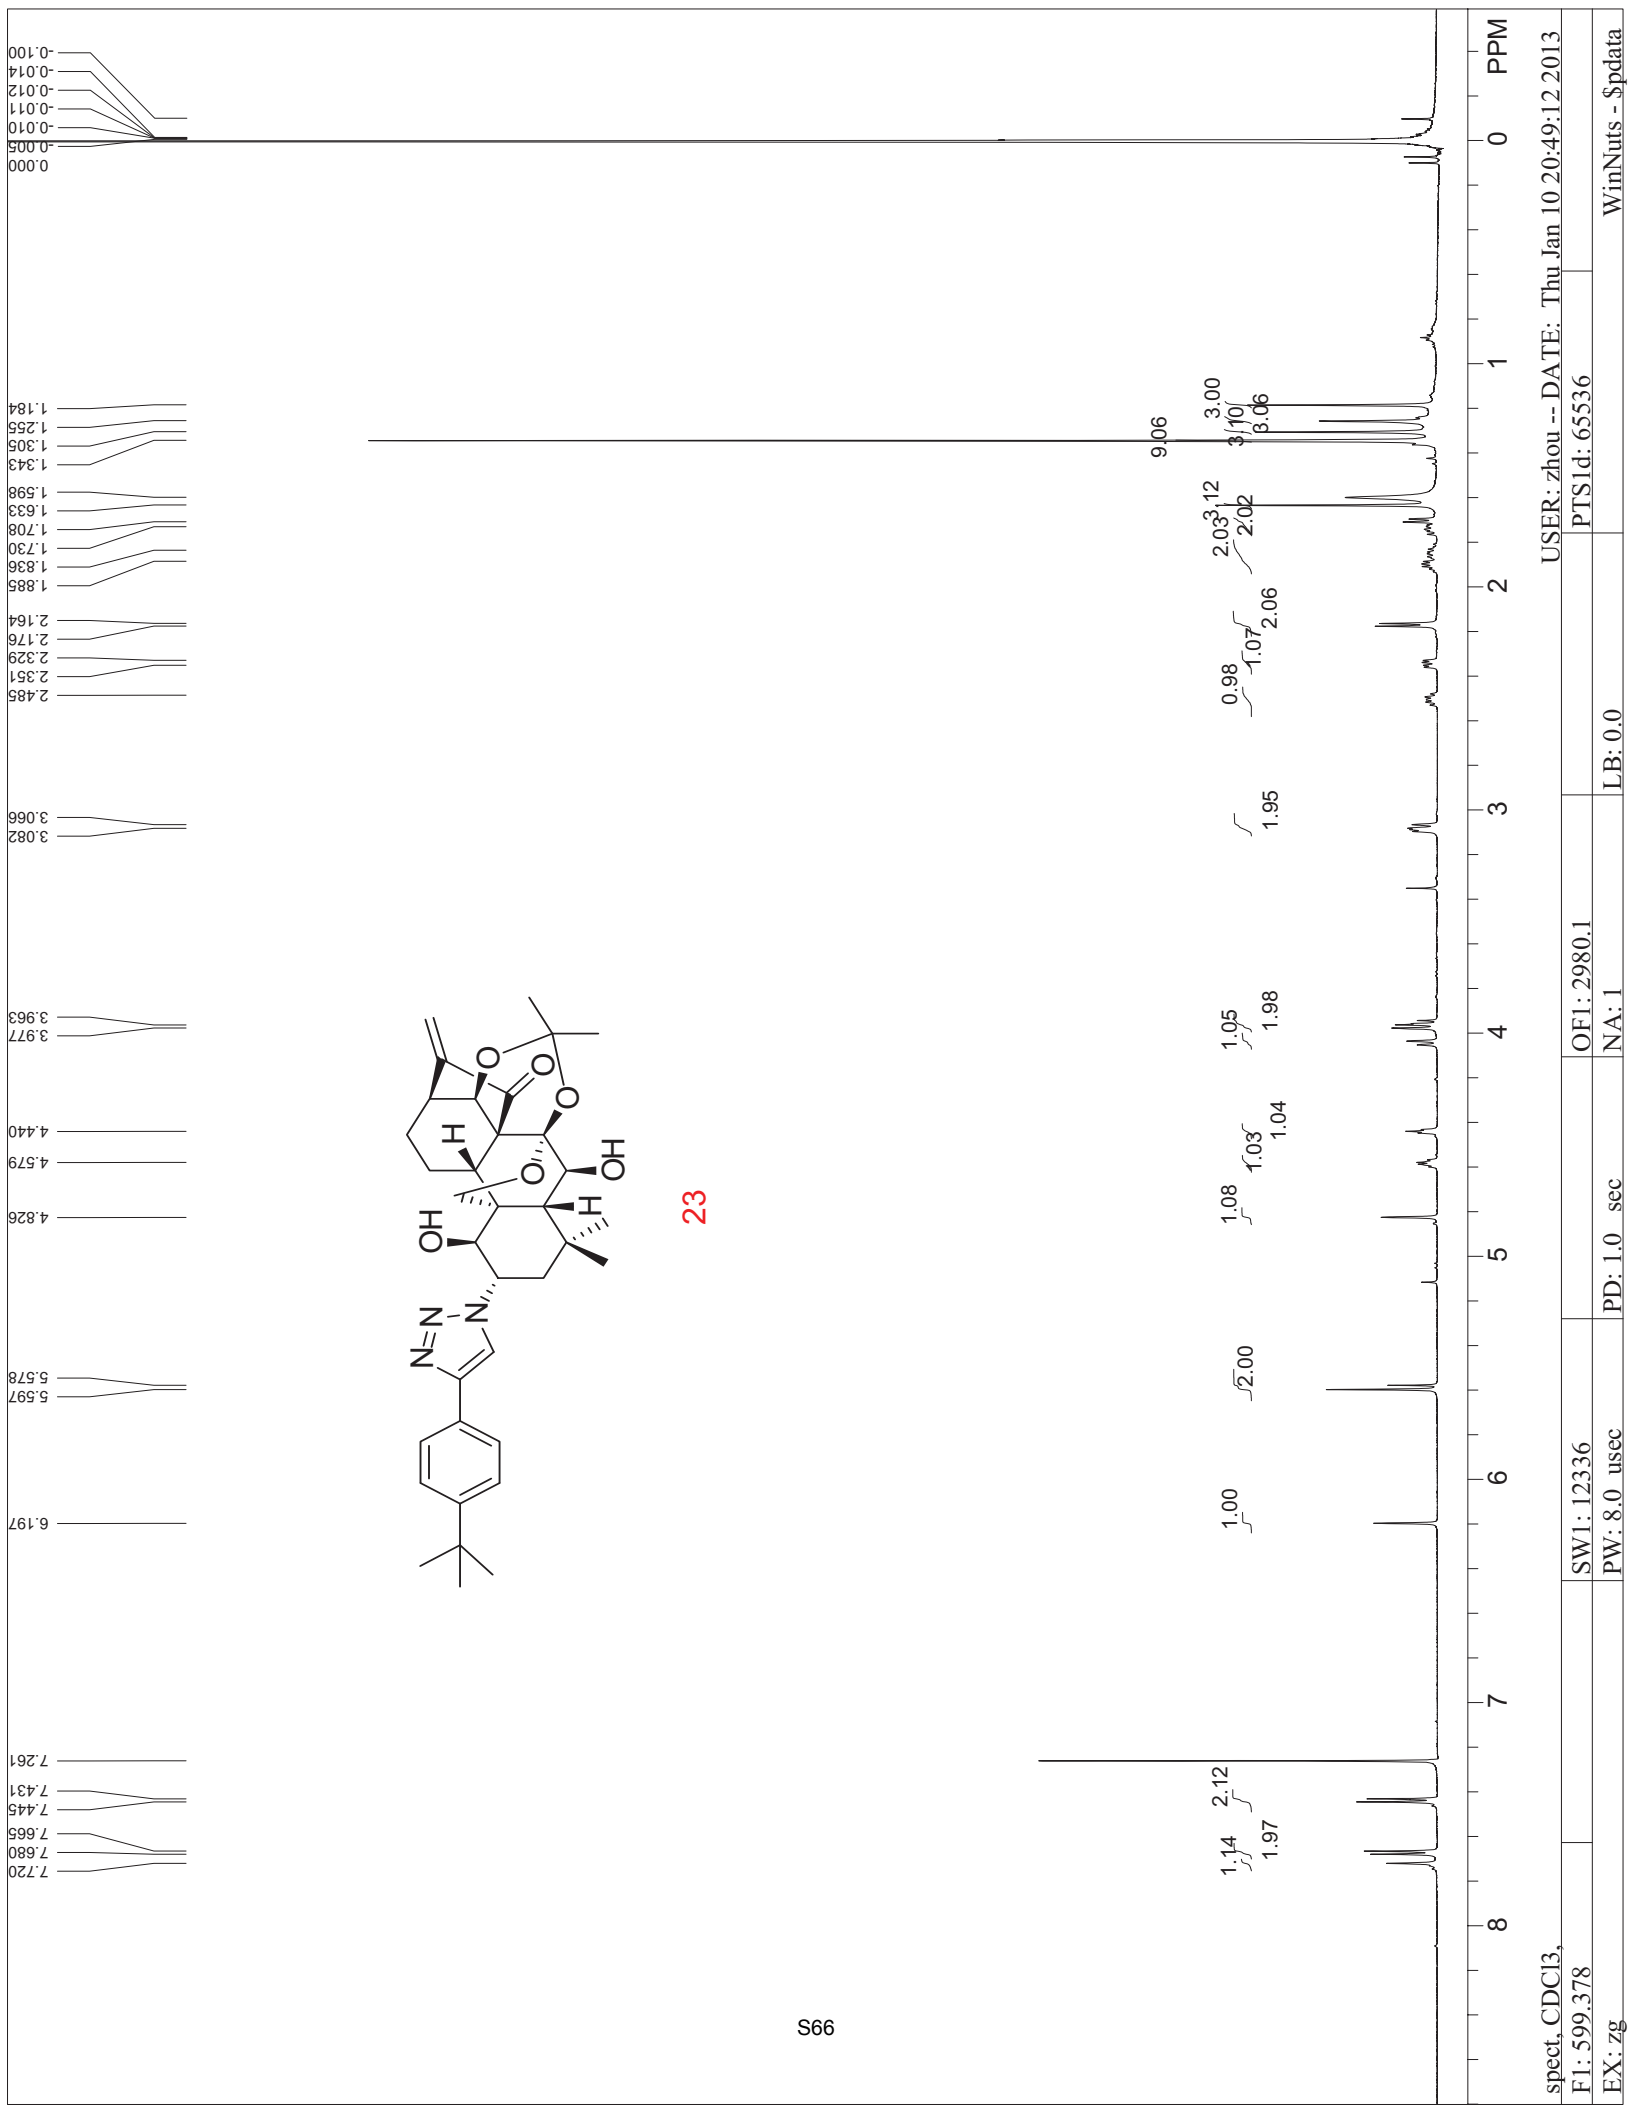

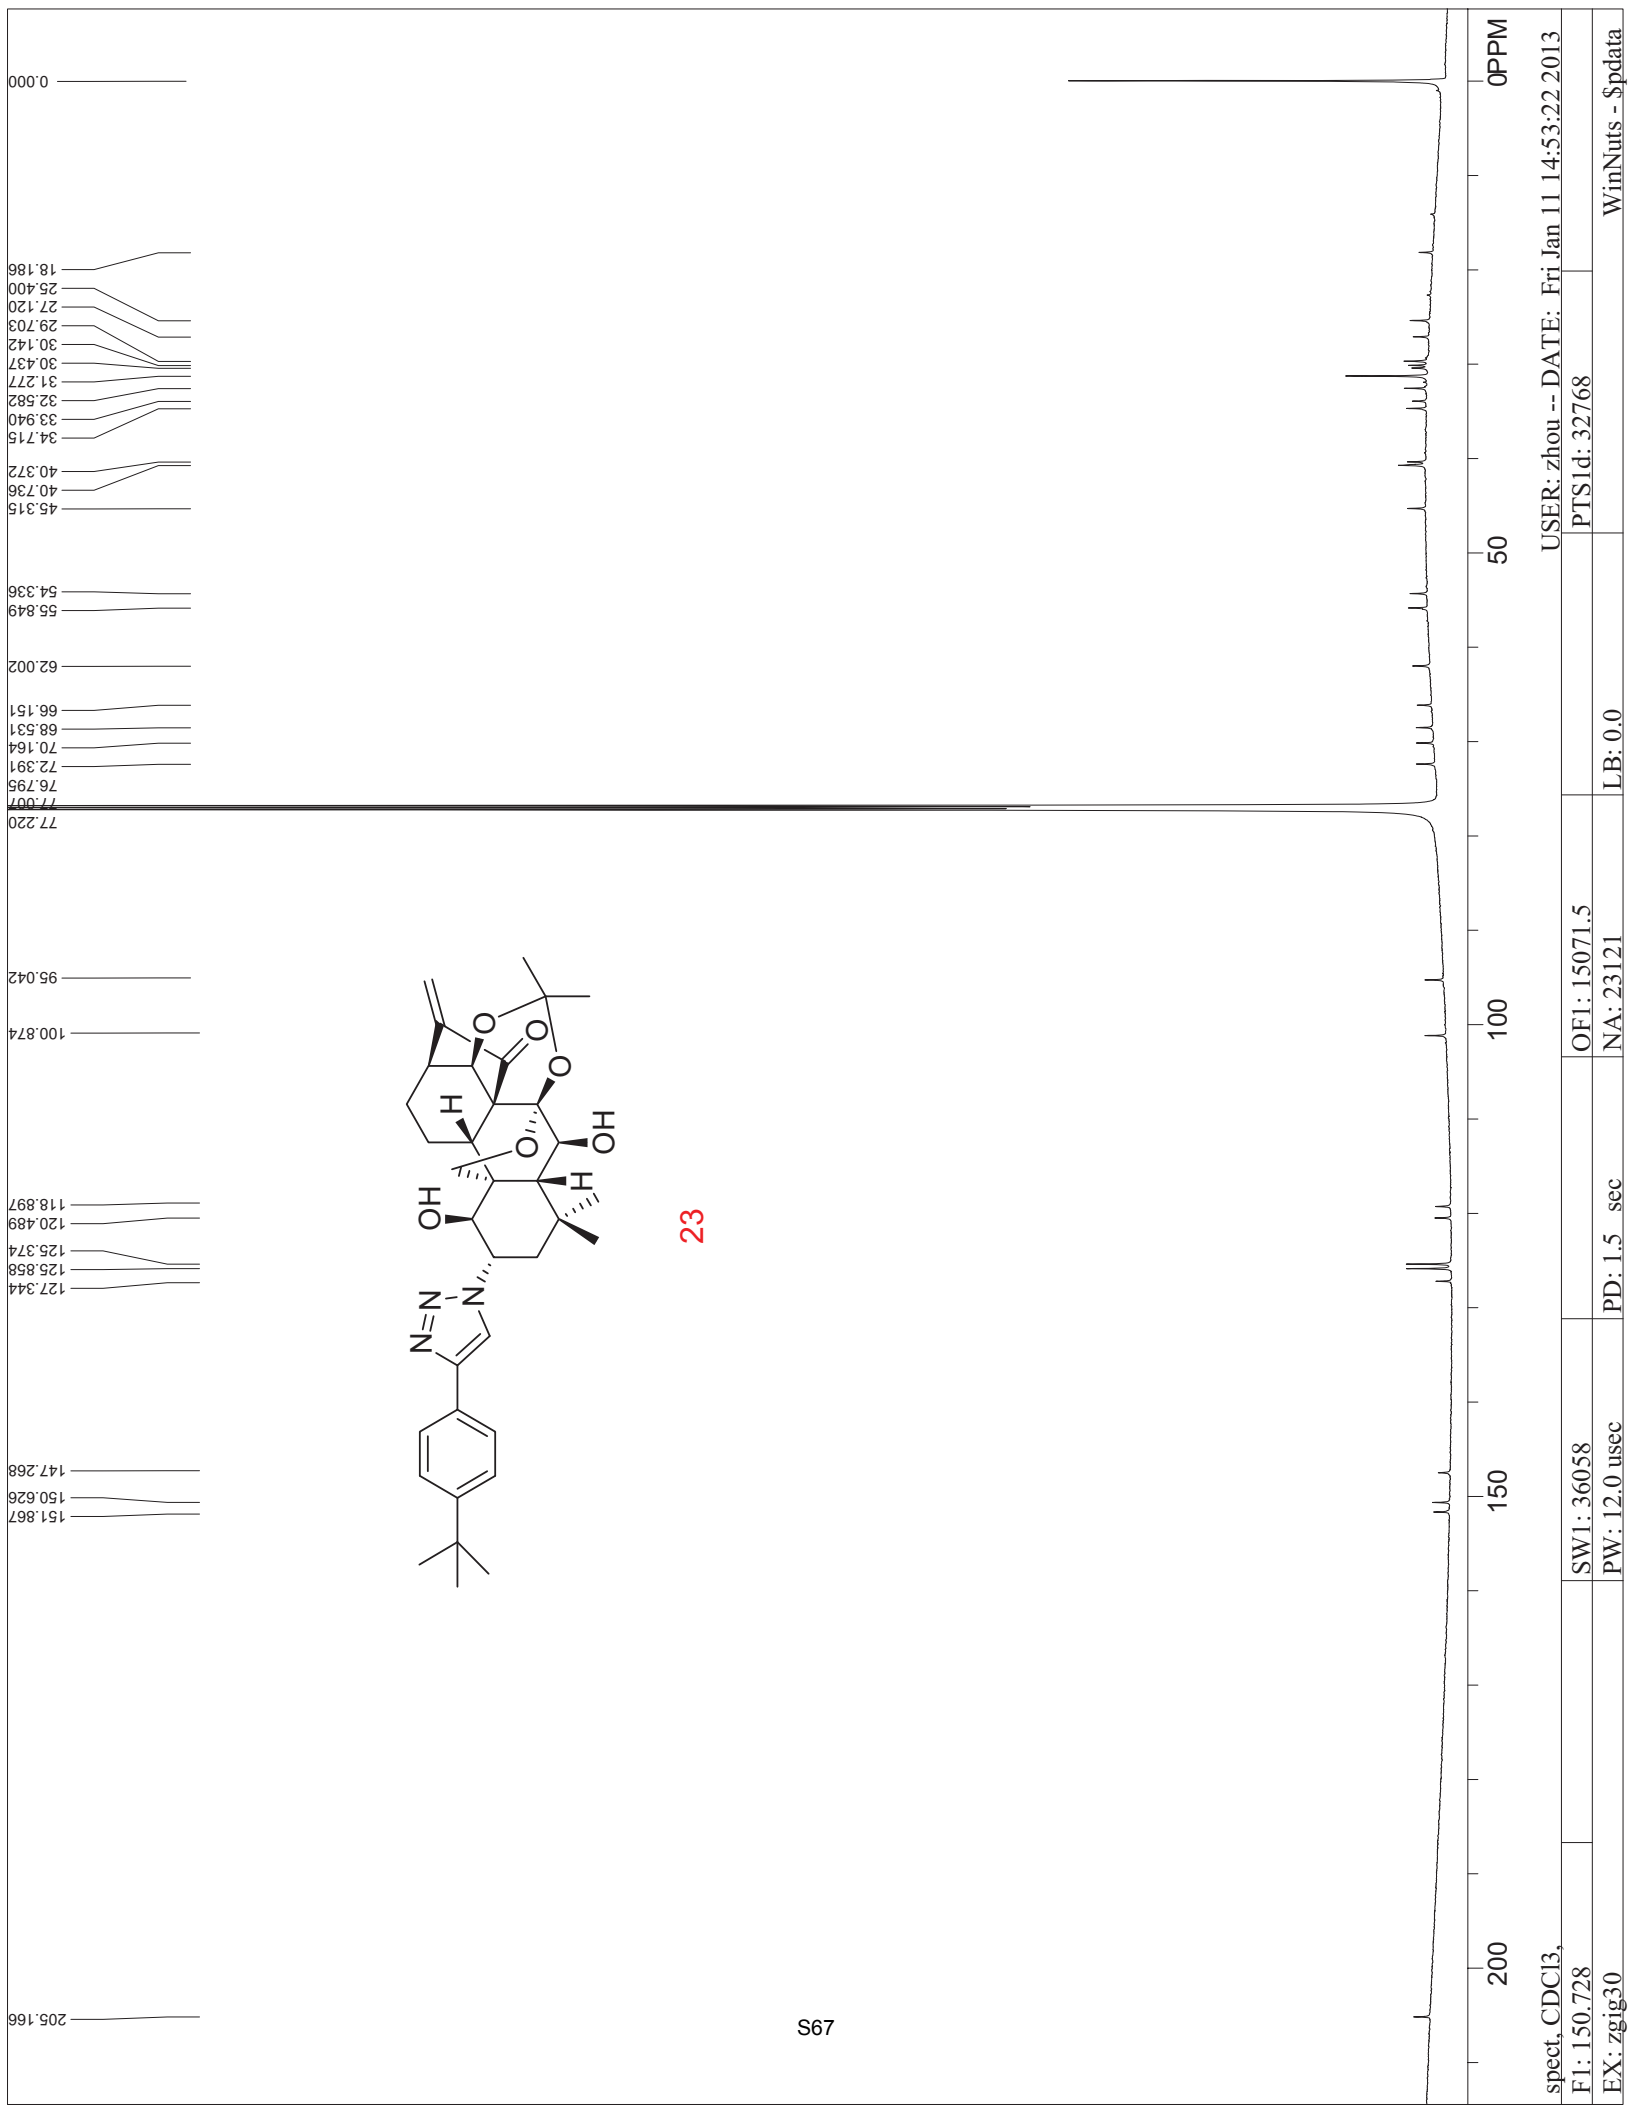

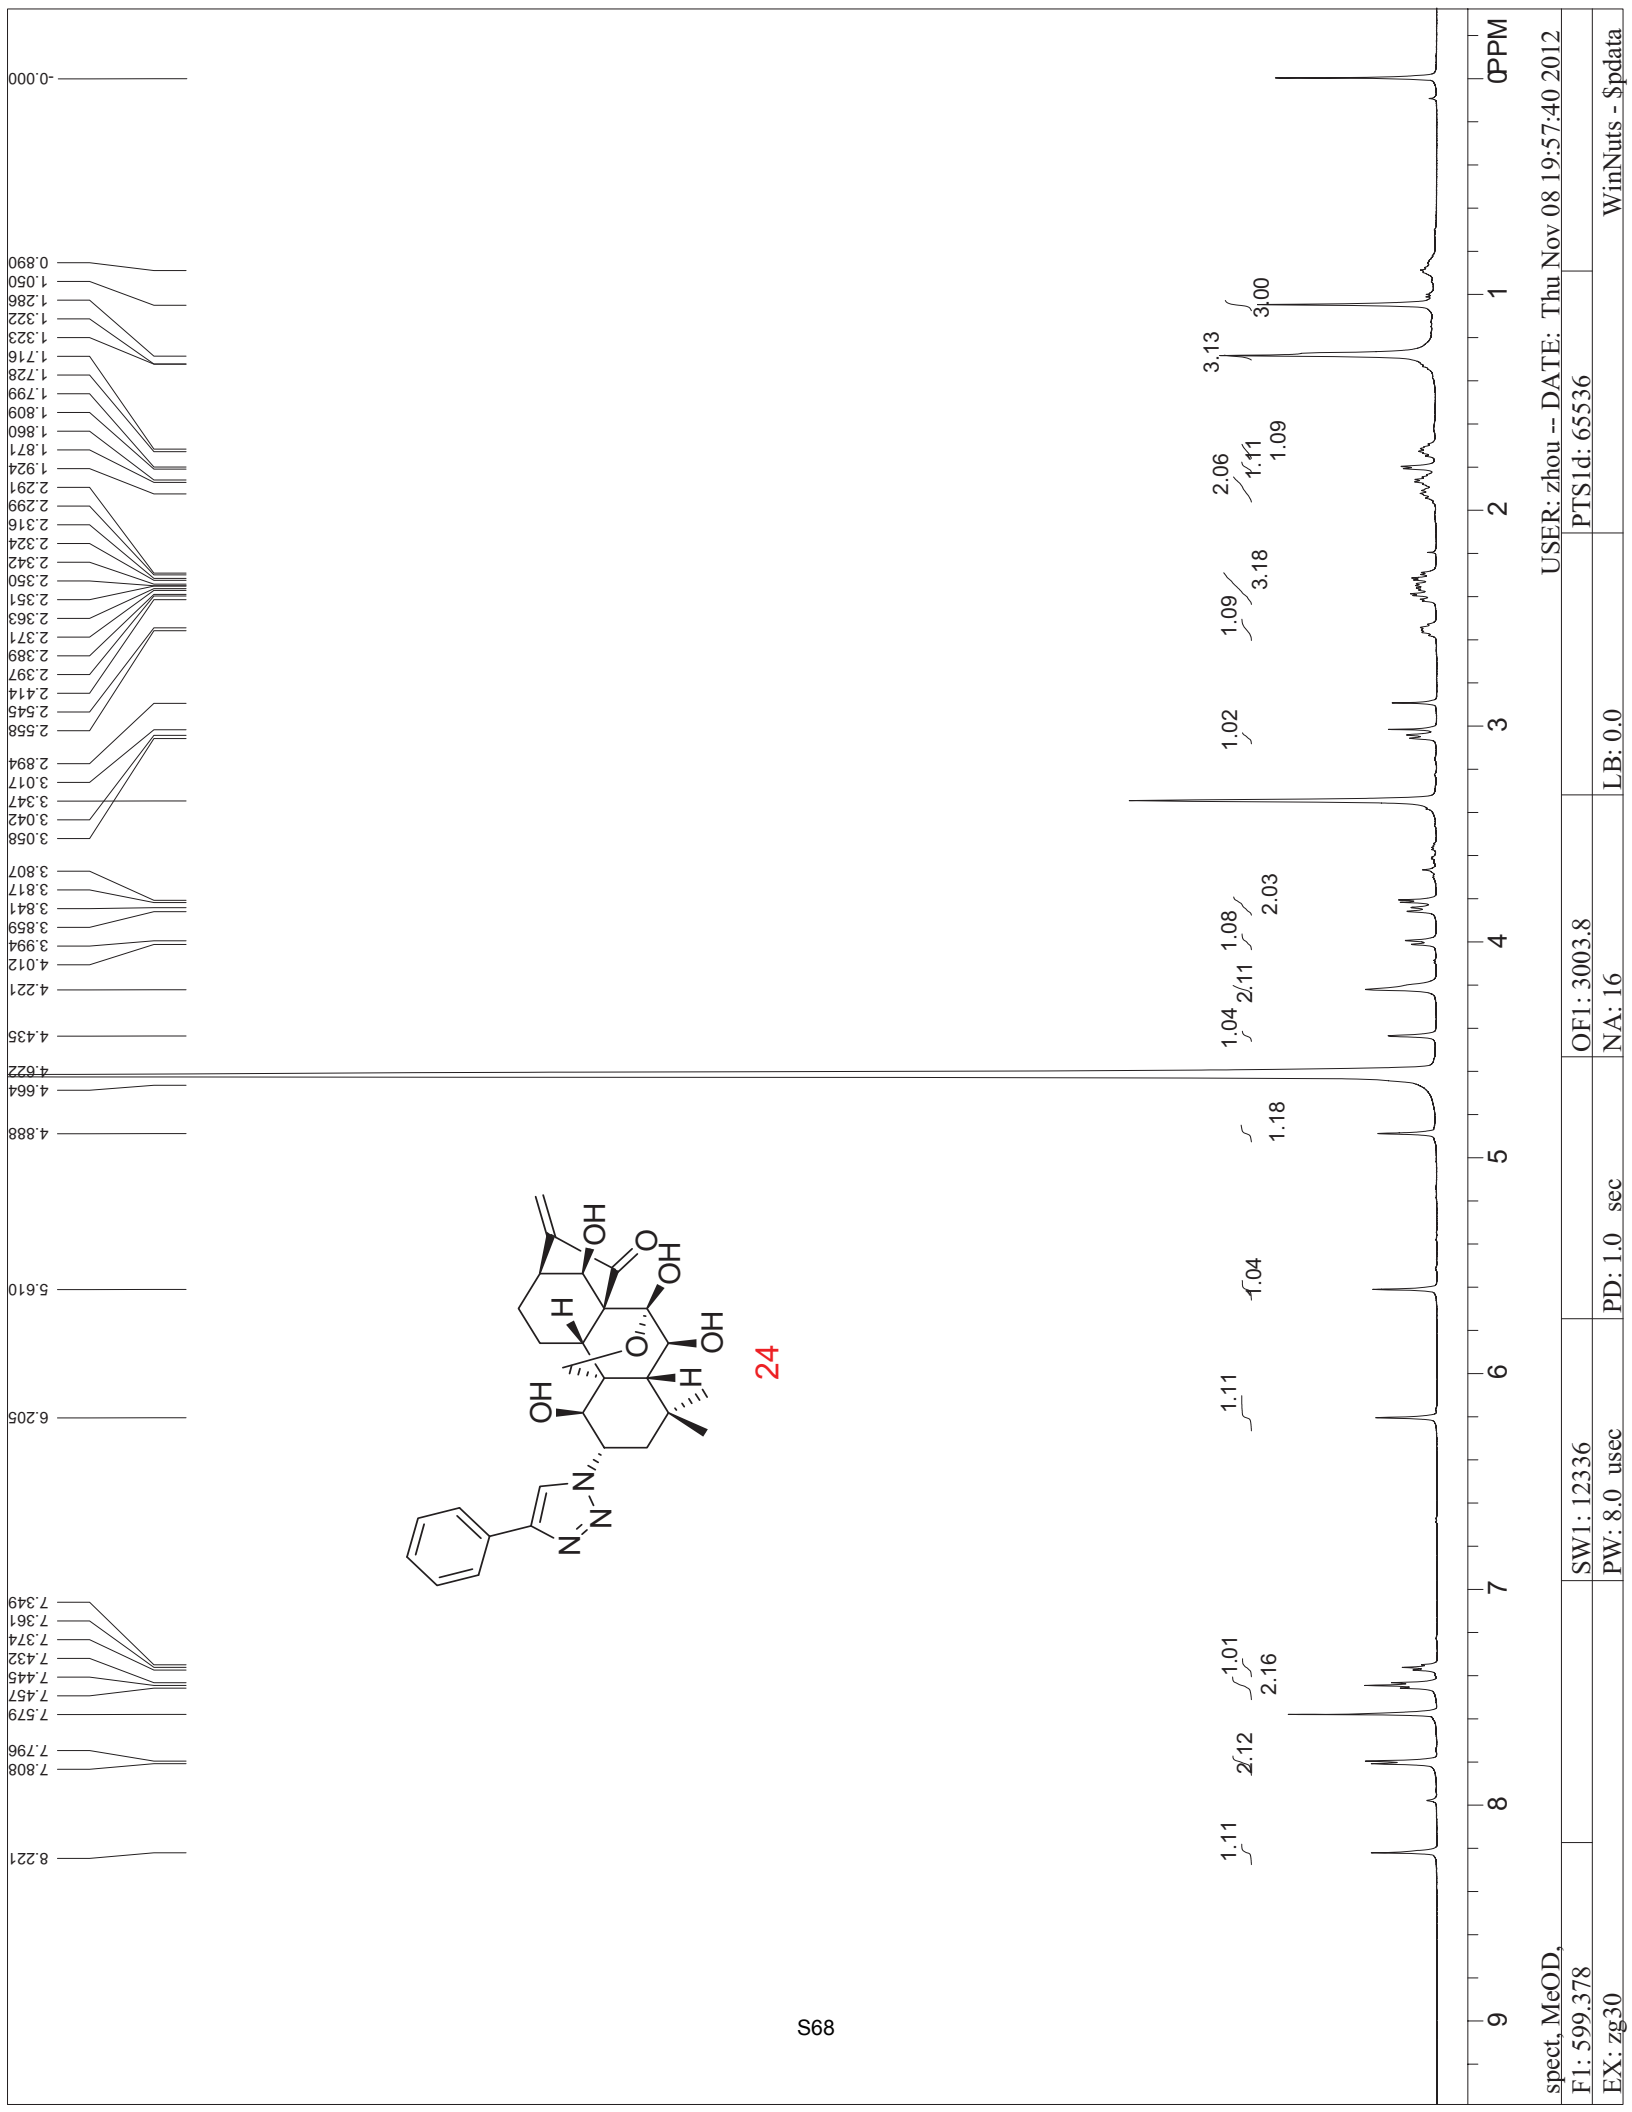

24

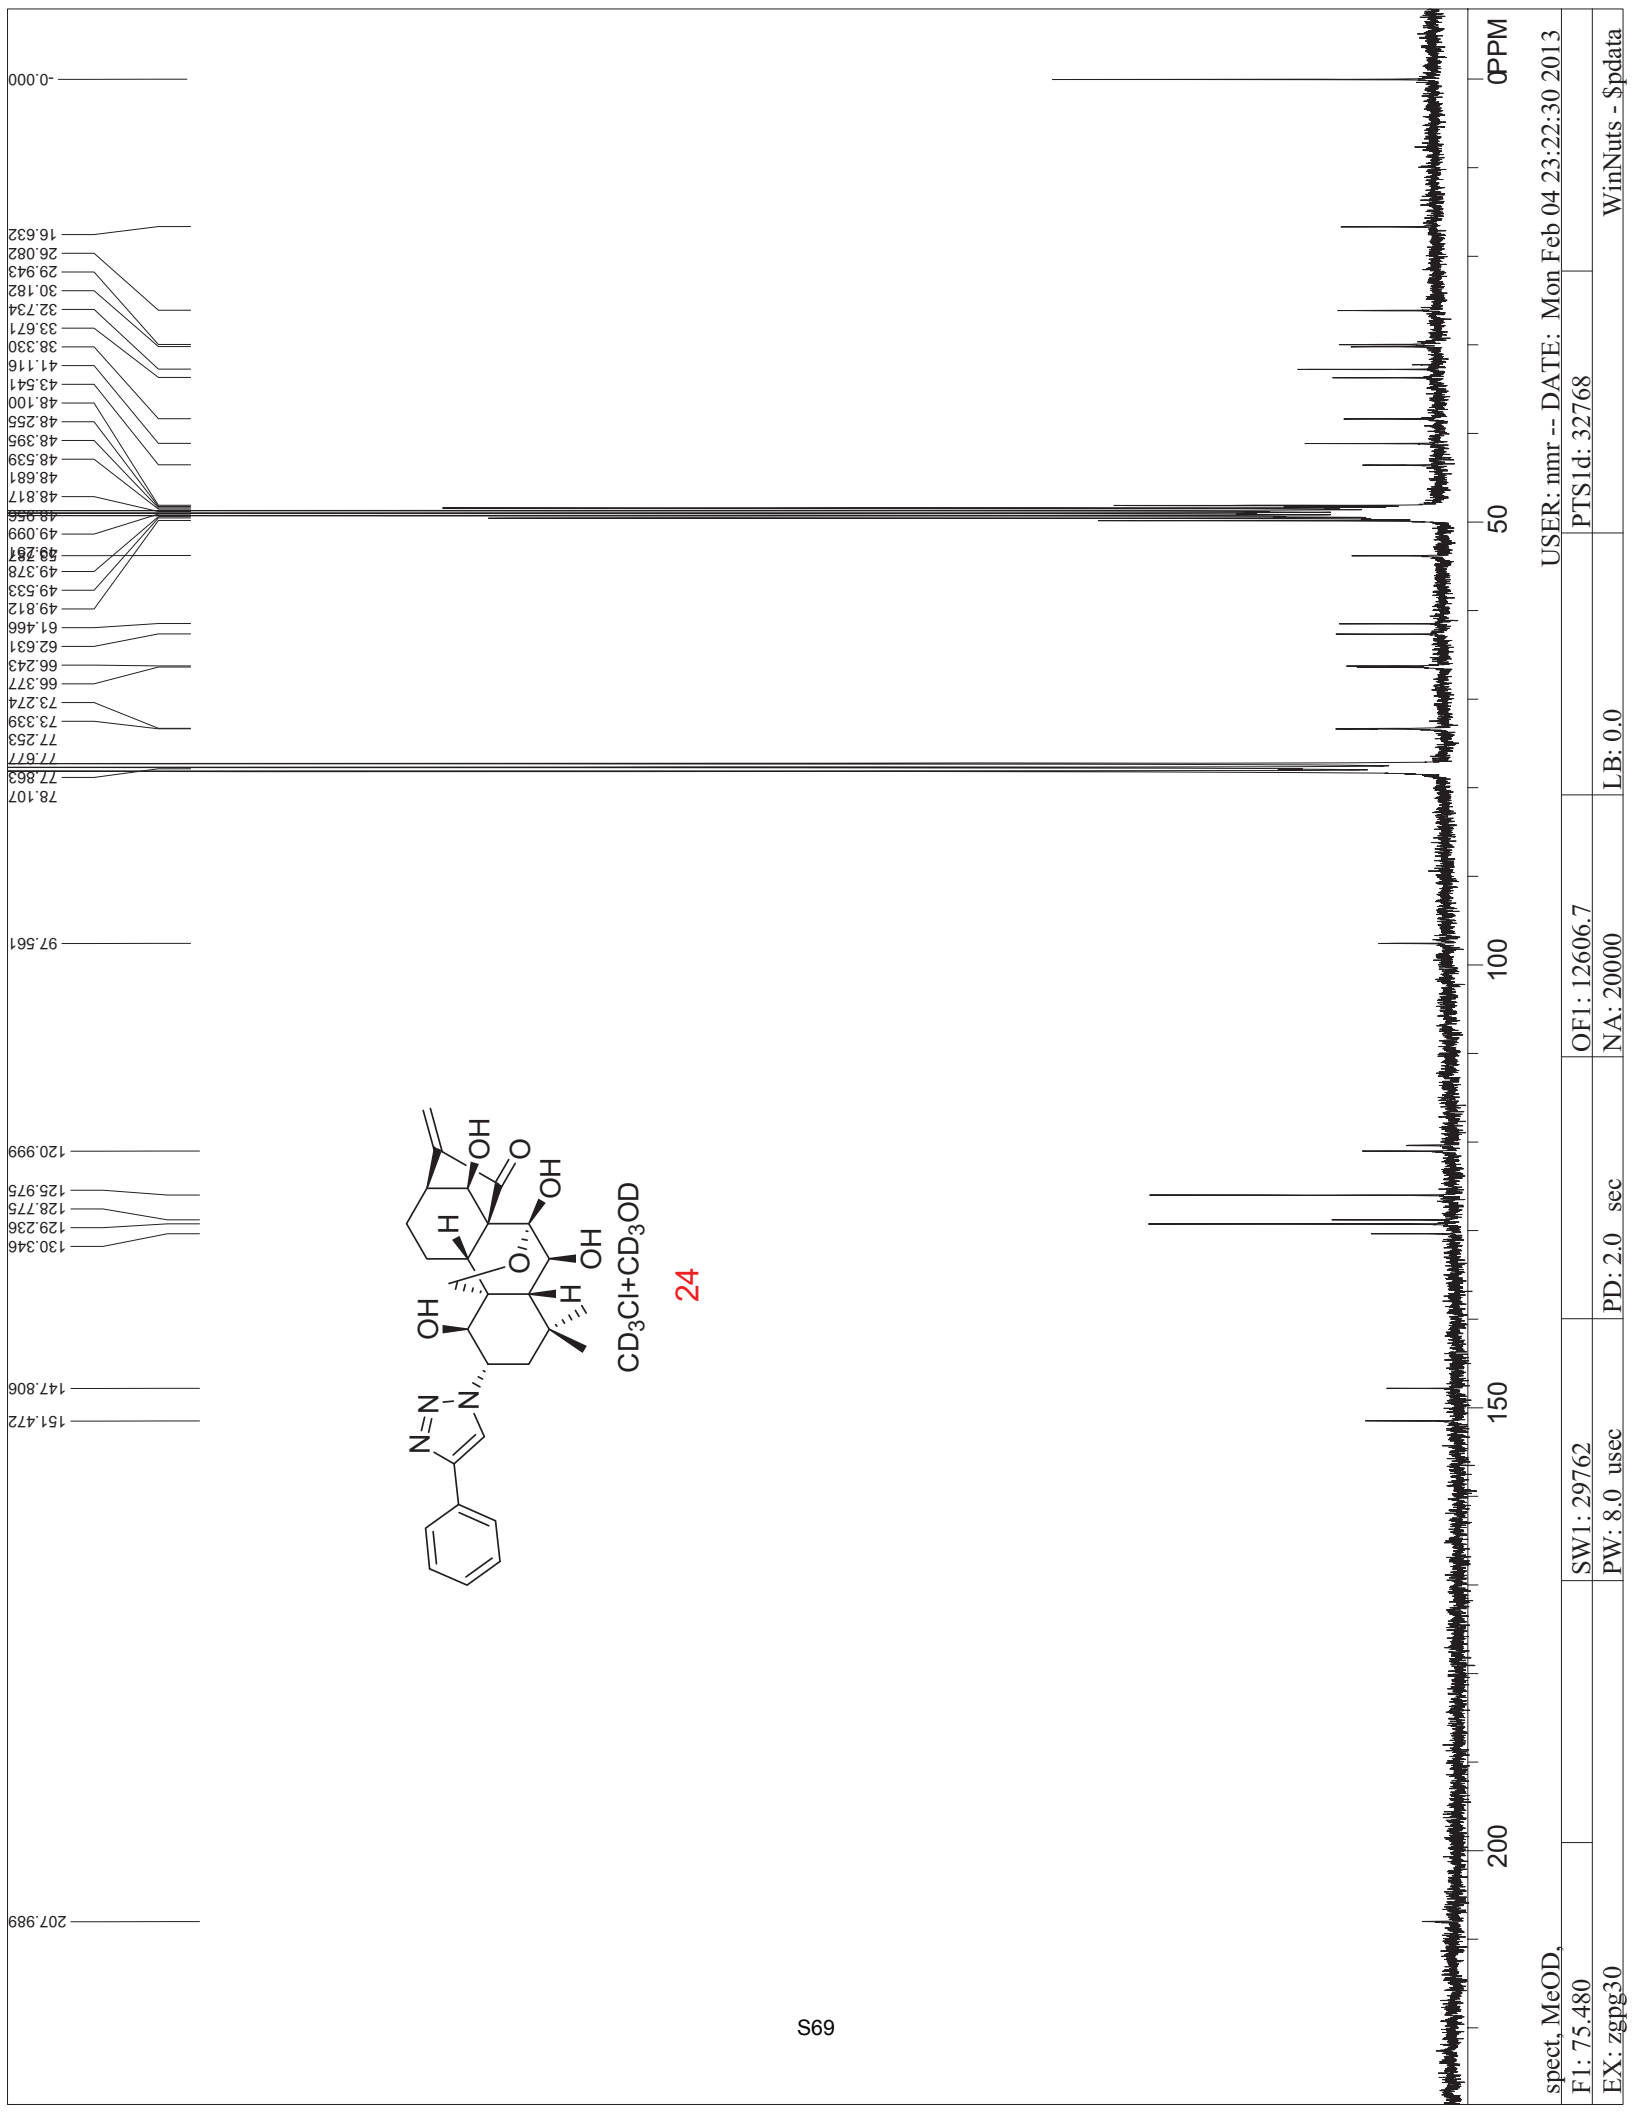

spect, MeOD, USER: nmr -- DATE: Mon Feb 04 23:22:30 2013  
 F1: 75.480 OF1: 12606.7 PTS1d: 32768  
 EX: zgpg30 PD: 2.0 sec NA: 20000 LB: 0.0 WinNuts - \$pdata

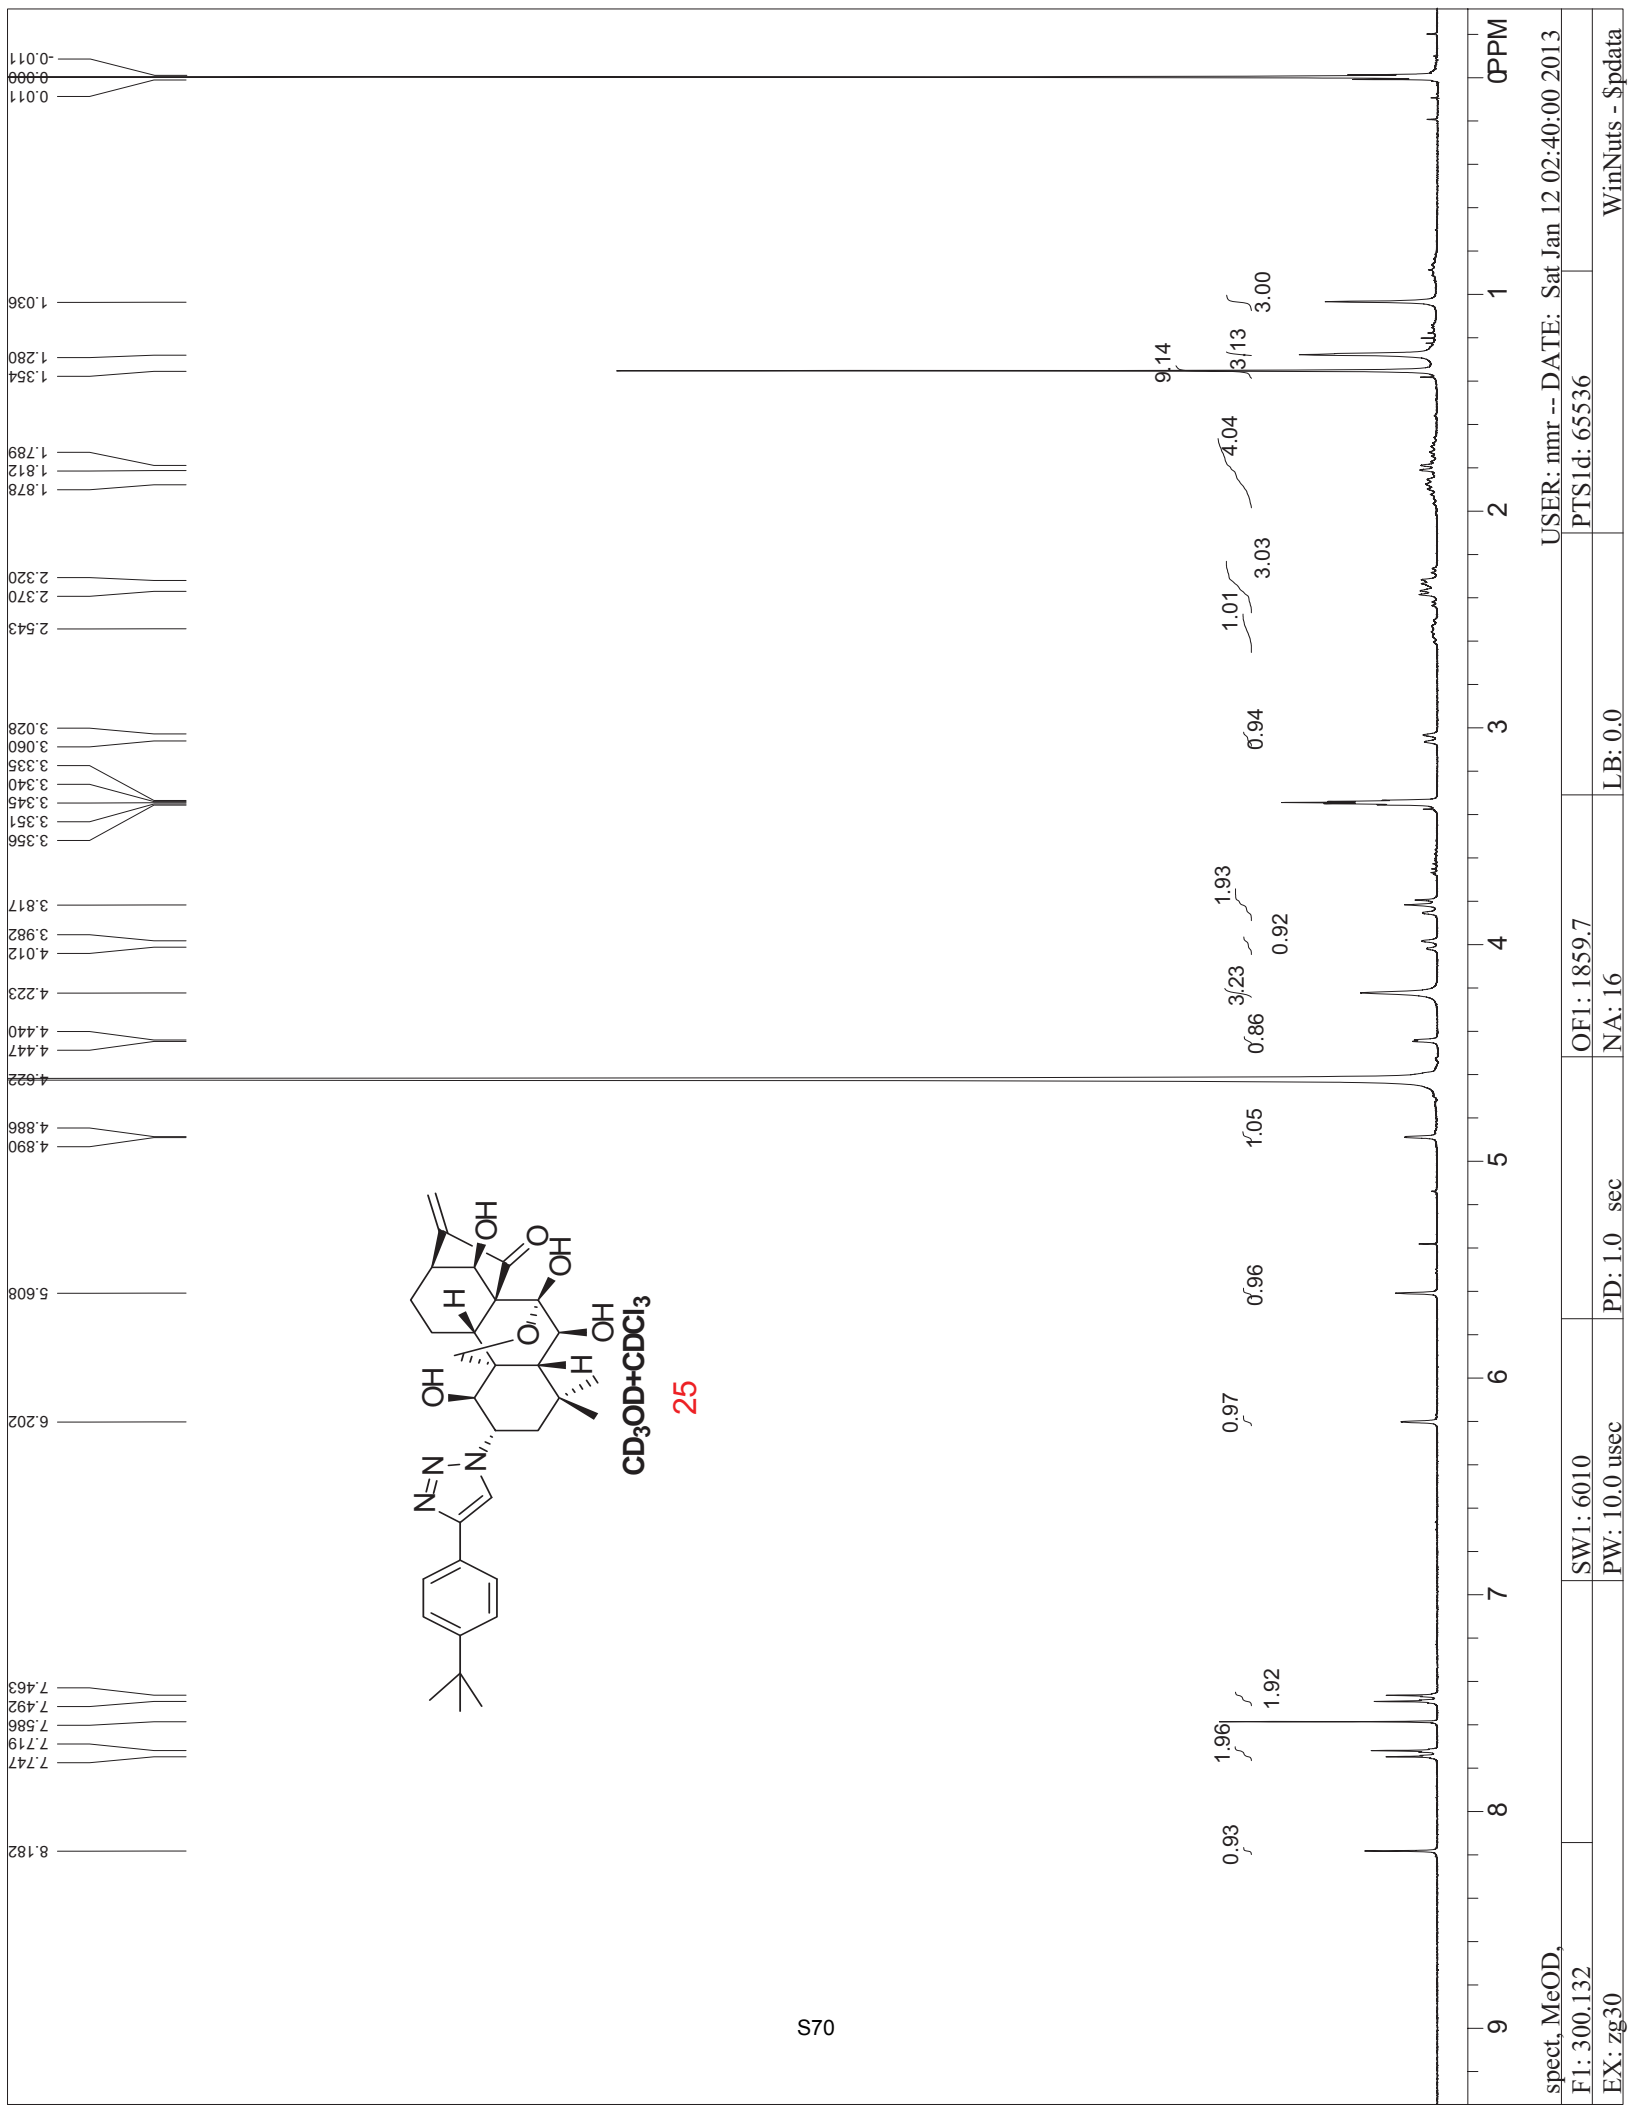

spect, MeOD, USER: nmr --- DATE: Sat Jan 12 02:40:00 2013  
 F1: 300.132 OF1: 1859.7 PTS1d: 65536  
 EX: zg30 PD: 1.0 sec NA: 16 LB: 0.0 WinNuts - \$pdata

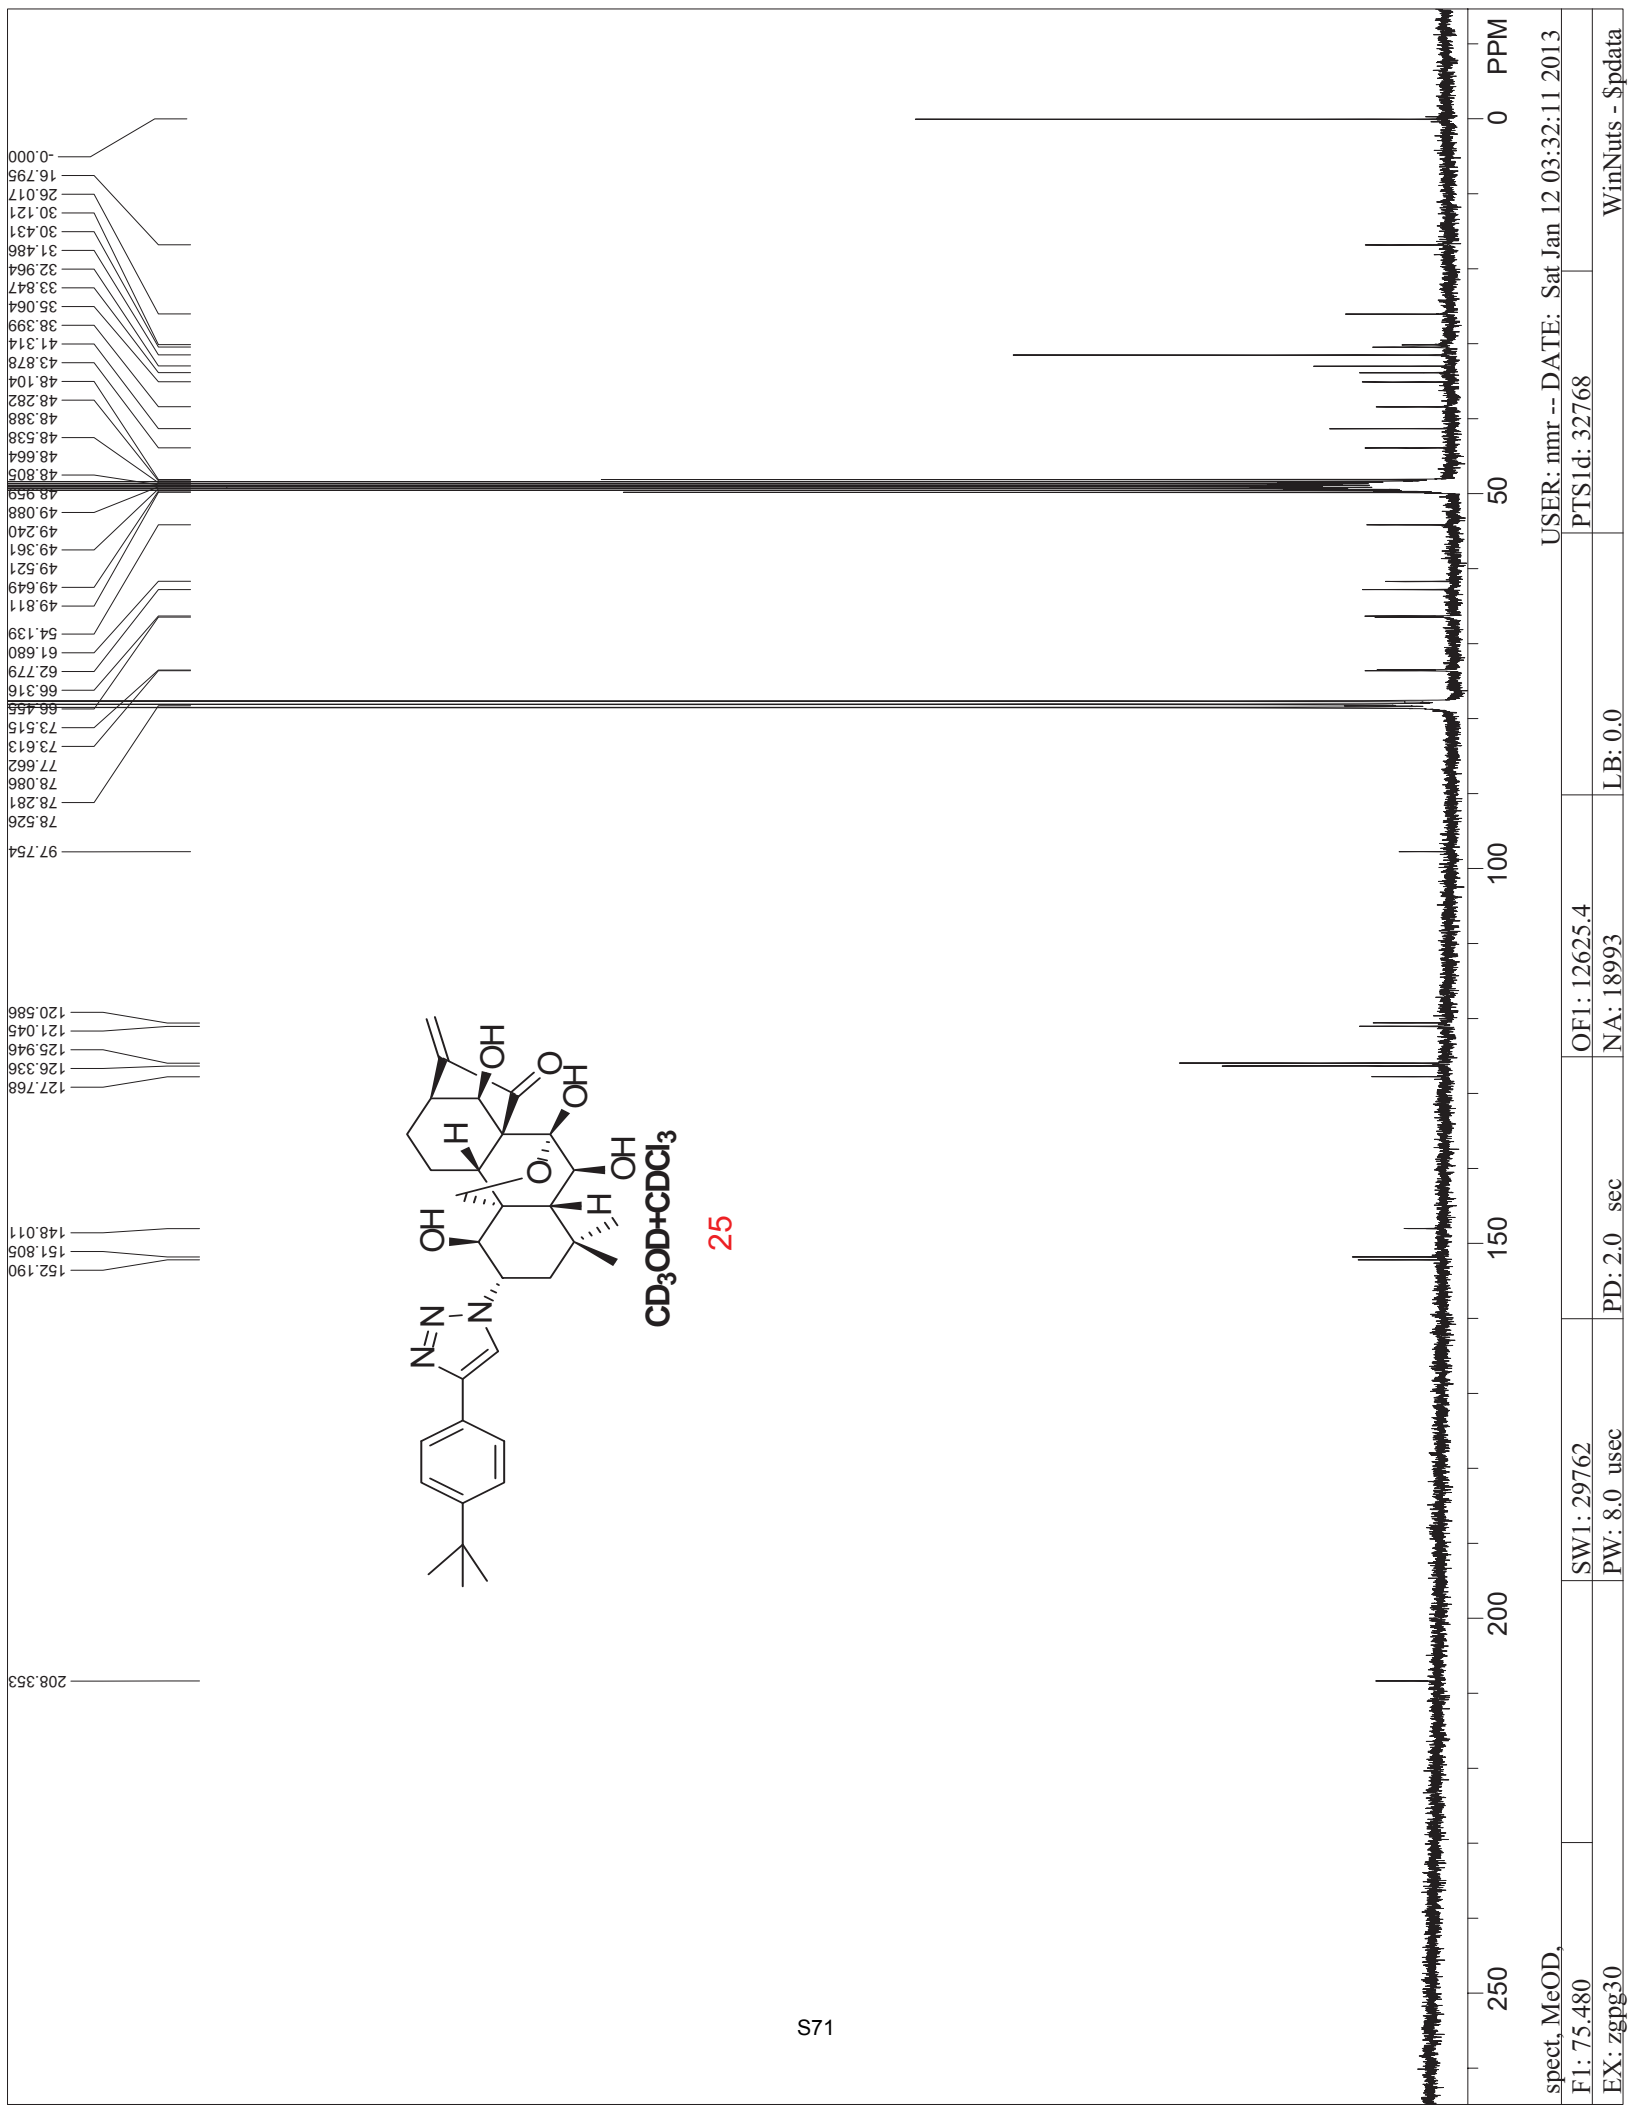

spect, MeOD, USER: nmr -- DATE: Sat Jan 12 03:32:11 2013  
 F1: 75.480 OF1: 12625.4 PTS1d: 32768  
 EX: zgpg30 PD: 2.0 sec NA: 18993 LB: 0.0 WinNuts - \$pdata
